# Supplementary material for: Regio- and stereo-selective construction of cis-indeno[1,2-c]isoxazoles via a C–H allylation/1,3-dipolar cycloaddition cascade
Source: Royal Society of Chemistry journal article supplement (doi:10.1039/d2qo01212j), 2022-01-01
Supplement: d2qo01212j1.pdf [file d2qo01212j1.pdf]

*Supporting Information*

**Regio- and stereo-selective construction of *cis*-indeno[1,2-*c*]isoxazoles  
via C–H allylation/1,3-dipolar cycloaddition cascade**

Man Zhu, Yanan Zhang, Miaomiao Tian, Xingwei Li, Bingxian Liu,\* and Junbiao Chang \*

*<sup>1</sup> NMPA Key Laboratory for Research and Evaluation of Innovative Drug, Collaborative Innovation Center of Henan Province for Green Manufacturing of Fine Chemicals, School of Chemistry and Chemical Engineering, Henan Normal University, Xinxiang, Henan 453007, China*

**Table of Contents**

|                                                              |    |
|--------------------------------------------------------------|----|
| 1. General Information.....                                  | 2  |
| 2. General Procedures for the Preparation of Substrates..... | 2  |
| 3. Experimental Section.....                                 | 6  |
| 4. Mechanistic Studies.....                                  | 13 |
| 5. X-Ray Crystal Structures.....                             | 20 |
| 6. References.....                                           | 24 |
| 7. Characterization Data.....                                | 25 |
| 8. NMR Spectrum and Mass Spectroscopy.....                   | 41 |

## 1. General Information

All chemicals were obtained from commercial sources and were used as received unless otherwise noted. All the reactions were carried out under argon atmosphere using standard Schlenk technique. The  $^1\text{H}$  NMR spectra were recorded on a 400 MHz or 600 MHz NMR spectrometer. The  $^{13}\text{C}$  NMR spectra were recorded at 100 MHz or 150 MHz. The  $^{19}\text{F}$  NMR spectra were recorded at 565 MHz. Chemical shifts were expressed in parts per million ( $\delta$ ) downfield from the internal standard TMS, and were reported as s (singlet), d (doublet), t (triplet), dd (doublet of doublet), dt (doublet of triplet), m (multiplet), brs (broad singlet), etc. The residual solvent signals were used as references and the chemical shifts were converted to the TMS scale. HRMS spectra were obtained on an Agilent Q-TOF 6540 spectrometer. Column chromatography was performed on silica gel (300-400 mesh). HPLC analysis was performed using the corresponding commercial chiral columns as stated in the experimental procedures at 30 °C with the UV detector at 254 nm. The vinylethylene carbonates **2a** and **5a** were purchased from commercial sources, and other vinylethylene carbonates **3a**, **4a**, were prepared by following a literature procedure.<sup>1</sup> The arylnitrones were prepared according to the literature report.<sup>2</sup> The azomethine imines were prepared according to the literature reports.<sup>3</sup>

## 2. General Procedures for the Preparation of Substrates

### (1) The Preparation of 3-Int

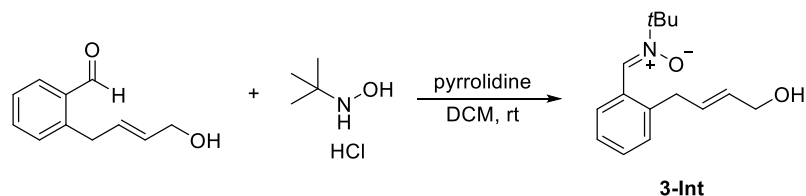

2-[(2E)-4-Hydroxy-2-buten-1-yl]benzaldehyde was prepared by following a literature procedure<sup>4</sup>. N-tert-Butylhydroxylamine hydrochloride (4.0 mmol) and the aldehyde (4.0 mmol) were dissolved in anhydrous DCM (20 mL). The reaction mixture was cooled down to 0 °C and pyrrolidine (4.8 mmol) was added dropwise. The reaction was stirred at room temperature. After the reaction was finished as judged by TLC (3 h), the solvent was then removed under reduced pressure to give a crude product. Purification by silica gel column chromatography with petroleum and ethyl acetate as eluent (PE: EA = 3: 1) to afford the pure product **3-Int**. Colourless oil, (683 mg, 69%);  $^1\text{H}$  NMR (400 MHz,  $\text{CDCl}_3$ )  $\delta$  9.08 – 8.92 (m, 1H), 7.65 (s, 1H), 7.26 – 7.21 (m, 2H), 7.13 – 7.08 (dd, m, 1H), 5.82 – 5.61 (m, 1H), 5.56 – 5.34 (m, 1H), 3.95 (dd,  $J = 5.6, 1.0$  Hz, 2H), 3.37 (dd,  $J = 6.0, 1.0$  Hz, 2H), 2.38 (s, 1H), 1.51 (s, 9H).  $^{13}\text{C}$  NMR (101 MHz,  $\text{CDCl}_3$ )  $\delta$  138.4, 131.1, 130.1, 129.8, 129.1, 128.4, 127.4, 126.8, 71.2, 62.9, 36.8, 28.3). HRMS (ESI):  $m/z$  calcd. for  $[\text{C}_{15}\text{H}_{21}\text{NNa}_2\text{O}_2, \text{M}+\text{Na}]^+$ : 270.1465; found: 270.1459.

### (2) The preparation of complex bioactive molecules

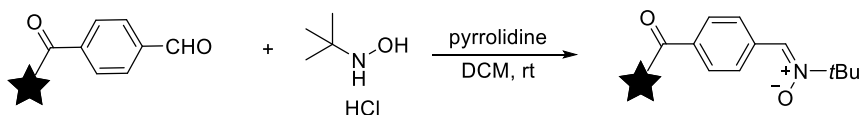

The corresponding aldehydes was prepared by following a literature<sup>5</sup> procedure, N-tert-Butylhydroxylamine hydrochloride (5.0 mmol) and the aldehydes (5.0 mmol) were dissolved in anhydrous DCM (20 mL). The reaction mixture was cooled down to 0 °C and pyrrolidine (6.0 mmol) was added dropwise. The reaction was stirred at room temperature. After the reaction was finished as judged by TLC (1-4 h), the solvent was then removed under reduced pressure to give a crude product. Purification by silica gel column chromatography with petroleum and ethyl acetate as eluent (PE: EA = 1:1-6:1) to afford the corresponding pure products.

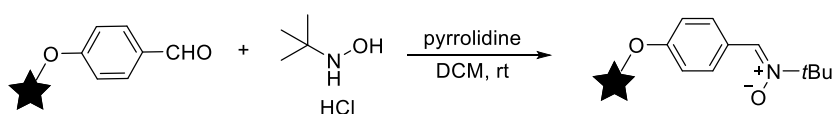

The corresponding aldehydes was prepared by following a literature<sup>5</sup> procedure, N-tert-Butylhydroxylamine hydrochloride (5.0 mmol) and the aldehydes (5.0 mmol) were dissolved in anhydrous DCM (20 mL). The reaction mixture was cooled down to 0 °C and pyrrolidine (6.0 mmol) was added dropwise. The reaction was stirred at room temperature. After the reaction was finished as judged by TLC (1-4h), the solvent was then removed under reduced pressure to give a crude product. Purification by silica gel column chromatography with petroleum and ethyl acetate as eluent (PE: EA = 1:1-6:1) to afford the corresponding pure products.

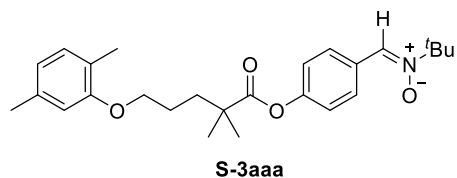

Characterizations of substrates: White solid, (5 mmol, 1.067 g, 50%); M.p.:76-79 °C. <sup>1</sup>H NMR (400 MHz, CDCl<sub>3</sub>) δ 8.35 (d, *J* = 8.8 Hz, 2H), 7.57 (s, 1H), 7.12 (d, *J* = 8.8 Hz, 2H), 7.03 (d, *J* = 7.4 Hz, 1H), 6.69 (d, *J* = 7.4 Hz, 1H), 6.65 (s, 1H), 4.01 (t, *J* = 4.8 Hz, 2H), 2.33 (s, 3H), 2.20 (s, 3H), 1.97 – 1.86 (m, 4H), 1.64 (s, 9H), 1.40 (s, 6H). <sup>13</sup>C NMR (101 MHz, CDCl<sub>3</sub>) δ 176.0, 156.8, 151.9, 136.5, 130.3, 130.0, 129.0, 128.6, 123.6, 121.6, 120.8, 111.9, 70.8, 67.7, 42.5, 37.1, 28.3, 25.2, 25.1, 21.4, 15.8. HRMS (ESI): *m/z* calcd. for [C<sub>26</sub>H<sub>35</sub>NNaO<sub>4</sub>, M+Na]<sup>+</sup>: 448.2458; found: 448.2450.

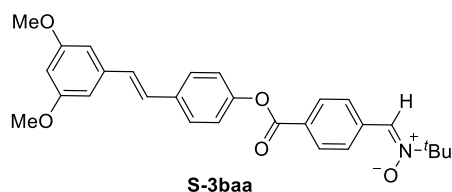

Characterizations of substrates: White solid, (3.1 mmol, 1.043 g, 74%); M.p.:137 - 139 °C. <sup>1</sup>H NMR (400 MHz, CDCl<sub>3</sub>) δ 8.43 (d, *J* = 8.4 Hz, 2H), 8.25 (d, *J* = 8.4 Hz, 2H), 7.69 (s, 1H), 7.58 (d, *J* = 8.4 Hz, 2H), 7.31 – 7.24 (m, 2H), 7.08 (q, *J* = 16.2 Hz, 2H), 6.70 (d, *J* = 2.0 Hz, 2H), 6.43 – 6.40 (m, 1H), 3.86 (s, 6H), 1.67 (s, 9H). <sup>13</sup>C NMR (101 MHz, CDCl<sub>3</sub>) δ 164.5, 161.0, 150.4, 139.2, 135.6, 135.1, 130.12, 130.1, 129.0, 128.9, 128.4, 128.2, 127.5, 121.9, 104.6, 100.1, 71.8, 55.4, 28.4. HRMS (ESI): *m/z* calcd. for [C<sub>28</sub>H<sub>29</sub>NNaO<sub>5</sub>, M+Na]<sup>+</sup> : 482.1938; found: 482.1911.

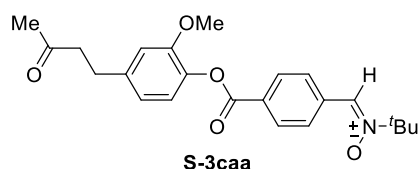

Characterizations of substrates: White solid, (4.1 mmol, 972 mg, 59%); M.p.:124 - 126 °C. <sup>1</sup>H NMR (400 MHz, CDCl<sub>3</sub>) δ 8.31 (d, *J* = 8.6 Hz, 2H), 8.15 (d, *J* = 8.6 Hz, 2H), 7.58 (s, 1H), 6.98 (d, *J* = 8.0 Hz, 1H), 6.77 (d, *J* = 1.6 Hz, 1H), 6.72 (dd, *J* = 8.0, 1.6 Hz, 1H), 3.73 (s, 3H), 2.84 (t, *J* = 7.4 Hz, 2H), 2.71 (t, *J* = 7.4 Hz, 2H), 2.09 (s, 3H), 1.57 (s, 9H). <sup>13</sup>C NMR (101 MHz, CDCl<sub>3</sub>) δ 207.7, 164.3, 151.1, 140.2, 138.2, 135.4, 130.4, 130.1, 129.0, 128.4, 122.7, 120.4, 112.8, 71.7, 55.9, 45.1, 30.1, 29.6, 28.3. HRMS (ESI): *m/z* calcd. for [C<sub>23</sub>H<sub>27</sub>NNaO<sub>5</sub>, M+Na]<sup>+</sup> : 420.1781; found: 420.1769.

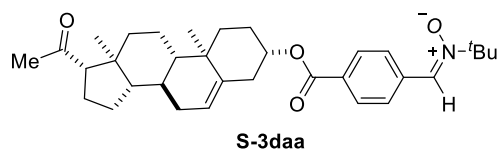

Characterizations of substrates: White solid, (3.2 mmol, 856 mg, 52%); M.p.:223 - 225 °C. <sup>1</sup>H NMR (400 MHz, CDCl<sub>3</sub>) δ 8.34 (d, *J* = 8.6 Hz, 2H), 8.08 (d, *J* = 8.6 Hz, 2H), 7.63 (s, 1H), 5.44 (d, *J* = 3.6 Hz, 1H), 5.01 – 4.78 (m, 1H), 2.56 (t, *J* = 8.8 Hz, 1H), 2.50 (d, *J* = 7.6 Hz, 2H), 2.25 – 2.16 (m, 1H), 2.15 (s, 3H), 2.12 – 2.20 (m, 3H), 1.95 (dt, *J* = 13.2, 3.4 Hz, 1H), 1.85 – 1.66 (m, 5H), 1.65 (s, 9H), 1.60 – 1.45 (m, 3H), 1.33 – 1.16 (m, 3H), 1.10 (s, 3H), 1.06 (dd, *J* = 11.6, 4.8 Hz, 1H), 0.67 (s, 3H). <sup>13</sup>C NMR (101 MHz, CDCl<sub>3</sub>) δ 209.4, 165.4, 139.6, 134.8, 131.5, 129.6, 129.0, 128.3, 122.5, 76.7, 74.7, 71.6, 63.7, 56.9, 49.9, 44.0, 38.8, 38.2, 37.1, 36.7, 31.9, 31.8, 31.5, 28.4, 27.8, 24.5, 22.9, 21.1, 19.8, 13.2. HRMS (ESI): *m/z* calcd. for [C<sub>33</sub>H<sub>45</sub>NNaO<sub>4</sub>, M+Na]<sup>+</sup> : 542.3241; found: 542.3249.

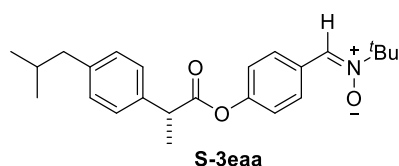

Characterizations of substrates: Colourless oil, (3.7 mmol, 392 mg, 28%). <sup>1</sup>H NMR (400 MHz, CDCl<sub>3</sub>) δ 8.21 (d, *J* = 8.8 Hz, 2H), 7.44 (s, 1H), 7.21 (d, *J* = 8.0 Hz, 2H), 7.06 (d, *J* = 8.0 Hz, 2H), 6.98 (d, *J* = 8.8 Hz, 2H), 3.85 (q, *J* = 7.2 Hz, 1H), 2.39 (d, *J* = 7.2 Hz, 2H), 1.86 – 1.74 (m, 1H), 1.51 (s, 9H), 0.83

(d,  $J = 6.6$  Hz, 6H).  $^{13}\text{C}$  NMR (101 MHz,  $\text{CDCl}_3$ )  $\delta$  172.8, 151.8, 140.9, 137.0, 130.0, 129.5, 129.2, 128.6, 127.2, 121.4, 70.8, 45.3, 45.1, 30.2, 28.3, 22.4, 18.5. HRMS (ESI):  $m/z$  calcd. for  $[\text{C}_{24}\text{H}_{31}\text{NNaO}_3, \text{M}+\text{Na}]^+$ : 404.2196; found: 404.2179.

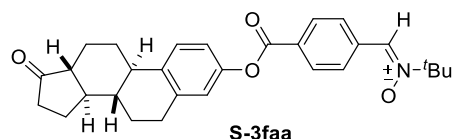

Characterizations of substrates: White solid, (5.0 mmol, 856 mg, 38%); M.p.:198 - 203 °C.  $^1\text{H}$  NMR (400 MHz,  $\text{CDCl}_3$ )  $\delta$  8.39 (d,  $J = 8$ . Hz, 2H), 8.21 (d,  $J = 8.8$  Hz, 2H), 7.66 (s, 1H), 7.33 (d,  $J = 8.4$  Hz, 1H), 6.99 (dd,  $J = 8.4, 2.4$  Hz, 1H), 6.96 (d,  $J = 2.4$  Hz, 1H), 3.04 – 2.86 (m, 2H), 2.57 – 2.47 (m, 1H), 2.46 – 2.38 (m, 1H), 2.32 (td,  $J = 10.8, 3.6$  Hz, 1H), 2.21 – 2.04 (m, 2H), 2.03 – 1.94 (m, 2H), 1.64 (s, 1.64), 1.70 – 1.58 (m, 3H), 1.55 – 1.43 (m, 3H), 0.92 (s, 3H).  $^{13}\text{C}$  NMR (101 MHz,  $\text{CDCl}_3$ )  $\delta$  220.8, 164.9, 148.9, 138.2, 137.6, 135.7, 130.4, 129.0, 128.6, 126.6, 121.8, 118.9, 77.5, 77.2, 76.8, 71.9, 50.6, 48.1, 44.3, 38.2, 35.9, 31.7, 29.6, 28.5, 26.5, 25.9, 21.7, 13.9. HRMS (ESI):  $m/z$  calcd. for  $[\text{C}_{30}\text{H}_{35}\text{NNaO}_4, \text{M}+\text{Na}]^+$ : 496.2458; found: 496.2458.

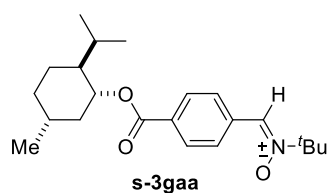

Characterizations of substrates: White solid, (3.2 mmol, 942 mg, 82%); M M.p.:98 - 102 °C.  $^1\text{H}$  NMR (400 MHz,  $\text{CDCl}_3$ )  $\delta$  8.25 (d,  $J = 8.6$  Hz, 2H), 7.99 (d,  $J = 8.6$  Hz, 2H), 7.54 (s, 1H), 4.87 (td,  $J = 10.8, 4.4$  Hz, 1H), 2.14 – 2.00 (m, 1H), 1.95 – 1.83 (m, 1H), 1.72 – 1.61 (m, 2H), 1.56 (s, 9H), 1.54 – 1.44 (m, 2H), 1.15 – 0.99 (m, 2H), 0.93 – 0.81 (m, 7H), 0.72 (d,  $J = 7.2$  Hz, 3H).  $^{13}\text{C}$  NMR (101 MHz,  $\text{CDCl}_3$ )  $\delta$  165.5, 134.7, 131.5, 129.6, 129.0, 128.3, 75.0, 71.5, 47.2, 40.9 34.3, 31.4, 28.3, 26.5, 23.7, 22.0, 20.7, 16.6. HRMS (ESI):  $m/z$  calcd. for  $[\text{C}_{22}\text{H}_{33}\text{NNaO}_3, \text{M}+\text{Na}]^+$ : 382.2353; found: 382.2339.

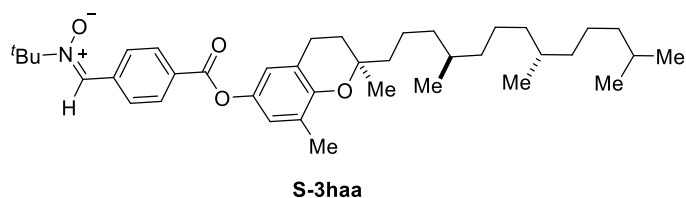

Characterizations of substrates: Yellow Oil, (1.3 mmol, 508 mg, 62%).  $^1\text{H}$  NMR (400 MHz,  $\text{CDCl}_3$ )  $\delta$  8.31 (d,  $J = 8.6$  Hz, 2H), 8.12 (d,  $J = 8.6$  Hz, 2H), 7.57 (s, 1H), 6.74 (d,  $J = 2.4$  Hz, 1H), 6.69 (d,  $J = 2.6$  Hz, 1H), 2.79 – 2.60 (m, 2H), 2.10 (s, 3H), 1.81 – 1.63 (m, 2H), 1.57 (s, 9H), 1.54 – 1.48 (m, 2H), 1.47 – 1.43 (m, 1H), 1.41 – 1.25 (m, 5H), 1.24 – 1.12 (m, 10H), 1.10 – 0.95 (m, 6H), 0.78 (t,  $J = 6.8$  Hz, 12H).  $^{13}\text{C}$  NMR (101 MHz,  $\text{CDCl}_3$ )  $\delta$  165.2, 149.9, 142.7), 135.4, 130.6, 130.2, 128.9, 128.4, 127.4, 121.2, 121.1, 119.1), 76.2, 71.72 (s, 2H), 40.2, 39.2, 37.5, 37.4, 37.3, 32.8, 32.7, 31.0, 28.4, 28.0, 24.8,

24.4, 24.2, 22.7, 22.6, 22.5, 20.9, 19.8, 19.7, 16.1. HRMS (ESI):  $m/z$  calcd. for  $[C_{39}H_{59}NNaO_4, M+Na]^+$ : 628.4336; found:628.4320.

### 3. Experimental Section

#### (1) Optimization studies for vinyl ethylene carbonate and azomethine imines

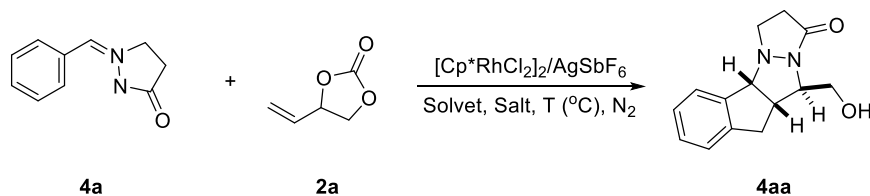

| entry           | Catalyst (mol %)                              | Solvent     | Salt                     | T ( $^\circ\text{C}$ ) | yield <sup>b</sup>         |
|-----------------|-----------------------------------------------|-------------|--------------------------|------------------------|----------------------------|
| 1               | $[\text{Cp}^*\text{RhCl}_2]_2/\text{AgSbF}_6$ | DCM         | $\text{Ag}_2\text{CO}_3$ | 80                     | Decomposition of <b>4a</b> |
| 2               | $[\text{Cp}^*\text{RhCl}_2]_2/\text{AgSbF}_6$ | PhCl        | $\text{Ag}_2\text{CO}_3$ | 80                     | Decomposition of <b>4a</b> |
| 3               | $[\text{Cp}^*\text{RhCl}_2]_2/\text{AgSbF}_6$ | THF         | $\text{Ag}_2\text{CO}_3$ | 80                     | Self-coupling of <b>4a</b> |
| 4               | $[\text{Cp}^*\text{RhCl}_2]_2/\text{AgSbF}_6$ | TFE         | $\text{Ag}_2\text{CO}_3$ | 80                     | 58%                        |
| 5               | $[\text{Cp}^*\text{RhCl}_2]_2/\text{AgSbF}_6$ | 1,4-Dioxane | $\text{Ag}_2\text{CO}_3$ | 80                     | 54%                        |
| 6               | $[\text{Cp}^*\text{RhCl}_2]_2/\text{AgSbF}_6$ | TFE         | $\text{AgOAc}$           | 80                     | 46%                        |
| 7               | $[\text{Cp}^*\text{RhCl}_2]_2/\text{AgSbF}_6$ | TFE         | -                        | 80                     | 67%                        |
| 8               | $[\text{Cp}^*\text{RhCl}_2]_2/\text{AgSbF}_6$ | TFE         | -                        | 60                     | 62%                        |
| 9               | $[\text{Cp}^*\text{RhCl}_2]_2/\text{AgSbF}_6$ | TFE         | -                        | 40                     | 50%                        |
| 10              | $[\text{Cp}^*\text{RhCl}_2]_2/\text{AgSbF}_6$ | TFE         | -                        | 100                    | 72%                        |
| 11              | $[\text{Cp}^*\text{RhCl}_2]_2/\text{AgSbF}_6$ | TFE         | 4Å (60 mg)               | 80                     | 76%                        |
| 12 <sup>c</sup> | $[\text{Cp}^*\text{RhCl}_2]_2/\text{AgSbF}_6$ | TFE         | 4Å (60 mg)/NaOAc         | 80                     | 52%                        |

<sup>a</sup>Reaction conditions: **4** (0.1 mmol), **2** (0.15 mmol),  $[\text{Cp}^*\text{RhCl}_2]_2$  (4 mol%),  $\text{AgSbF}_6$  (16 mol%), additive (0.05 mmol), solvent (1.0 mL), 24 h, under Ar, <sup>b</sup>Isolated yields. <sup>c</sup>NaOAc (0.1 mmol).

## (2) Optimization studies for the reaction of **1a** with **2c**

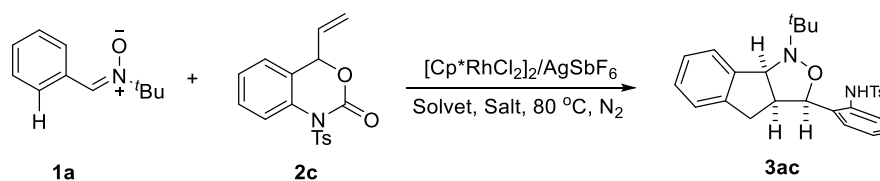

| entry          | Catalyst (mol %)                              | Solvent     | Salt                                    | yield <sup>b</sup> |
|----------------|-----------------------------------------------|-------------|-----------------------------------------|--------------------|
| 1              | $[\text{Cp}^*\text{RhCl}_2]_2/\text{AgSbF}_6$ | PhCl        | $\text{Ag}_2\text{CO}_3$                | 45%                |
| 2              | $[\text{Cp}^*\text{RhCl}_2]_2/\text{AgSbF}_6$ | DCE         | $\text{Ag}_2\text{CO}_3$                | 35%                |
| 3              | $[\text{Cp}^*\text{RhCl}_2]_2/\text{AgSbF}_6$ | TFE         | $\text{Ag}_2\text{CO}_3$                | 16%                |
| 4              | $[\text{Cp}^*\text{RhCl}_2]_2/\text{AgSbF}_6$ | 1,4-Dioxane | $\text{Ag}_2\text{CO}_3$                | 6%                 |
| 5 <sup>c</sup> | $[\text{Cp}^*\text{RhCl}_2]_2/\text{AgSbF}_6$ | PhCl        | $\text{Ag}_2\text{CO}_3 + \text{NaOAc}$ | 61%                |
| 6 <sup>d</sup> | $[\text{Cp}^*\text{RhCl}_2]_2/\text{AgSbF}_6$ | DCE         | $\text{AgOAc} + \text{KHCO}_3$          | 38%                |

<sup>a</sup>Reaction conditions: **1a** (0.1 mmol), **2c** (0.15 mmol),  $[\text{Cp}^*\text{RhCl}_2]_2$  (4 mol%),  $\text{AgSbF}_6$  (16 mol%),  $\text{Ag}_2\text{CO}_3$  (0.05 mmol), solvent (1.0 mL), 80 °C, 12 h, under Ar. <sup>b</sup>Isolated yields. <sup>c</sup> $\text{Ag}_2\text{CO}_3$  (0.05 mmol),  $\text{NaOAc}$  (0.05 mmol), <sup>d</sup> $\text{AgOAc}$  (0.05 mmol),  $\text{KHCO}_3$  (0.05 mmol).

## (3) General procedures for the synthesis of products **3**.

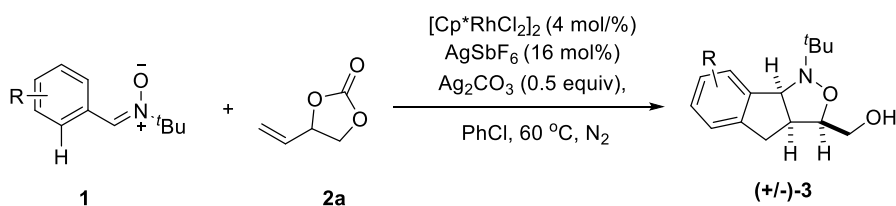

A mixture of **1** (0.1 mmol),  $[\text{Cp}^*\text{RhCl}_2]_2$  (2.5 mg, 4 mol%), and  $\text{Ag}_2\text{CO}_3$  (14 mg, 0.05 mmol), were charged into a reaction tube.  $\text{AgSbF}_6$  (5.5 mg, 16 mol%) was added in a glove box, and then to which were added **2a** (0.015 ml, 0.15 mmol) and dry PhCl (1.0 mL) under argon atmosphere. The reaction mixture was stirred at 60 °C heated by metal sand bath for 12 h. After the solvent was removed under reduced pressure, the residue was purified by silica gel chromatography (PE:EA = 2:1 – 6:1) to afford **3**.

## (4) General procedures for the synthesis of products **4aa**.

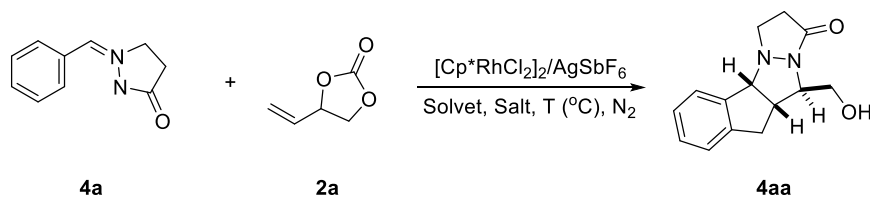

A mixture of **4** (0.1 mmol),  $[\text{Cp}^*\text{RhCl}_2]_2$  (2.5mg, 4 mol%), and 4A molecular sieve (60 mg) were charged into a reaction tube.  $\text{AgSbF}_6$  (5.5 mg, 16 mol%) was added in a glove box, and then to which were added **2a** (0.015 ml, 0.15 mmol) and TFE (1.0 mL) under argon atmosphere. The reaction mixture was stirred at 80 °C heated by metal sand bath for 24 h. After the solvent was removed under reduced pressure, the residue was purified by silica gel chromatography (DCM:Methanol =20:1) to afford **4aa**.

#### (5) Scale-up synthesis of the product **3aa**.

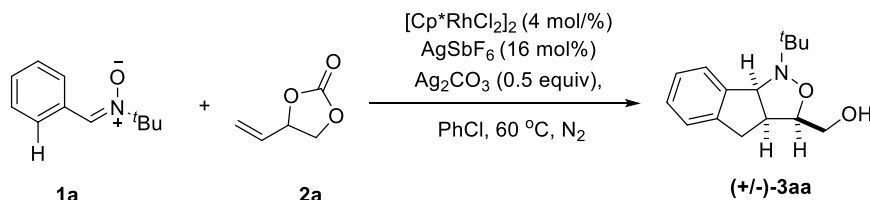

A mixture of **1a** (890 mg, 5.0 mmol),  $[\text{Cp}^*\text{RhCl}_2]_2$  (2.5mg, 4 mol%), and  $\text{Ag}_2\text{CO}_3$  (700 mg, 2.5 mmol), were charged into a round-bottom flask (100 mL).  $\text{AgSbF}_6$  (275 mg, 16 mol%) was added in a glove box, and then to which were added **2a** (0.75 ml, 7.5 mmol) and PhCl (50.0 mL) under argon atmosphere. The reaction mixture was stirred at 60 °C heated by metal sand bath for 48 h. After the solvent was removed under reduced pressure, the residue was purified by silica gel chromatography using PE: EtOAc =4:1 to afford **3aa** (778mg, 72% yielded).

#### (6) General procedures for the synthesis of product **3ab**.

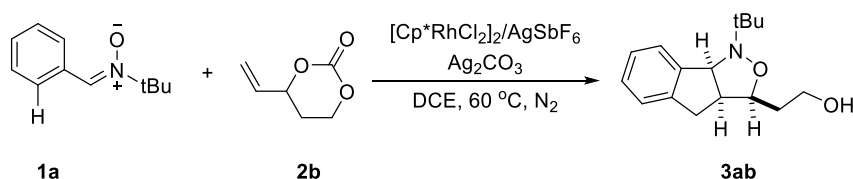

A mixture of **1a** (0.1 mmol),  $[\text{Cp}^*\text{RhCl}_2]_2$  (2.5mg, 4 mol%), and  $\text{Ag}_2\text{CO}_3$  (14 mg, 0.05 mmol) were charged into a reaction tube.  $\text{AgSbF}_6$  (5.5 mg, 16 mol%) was added in a glove box, and then to which were added **2b** (19.2 mg, 0.15 mmol) and DCE (1.0 mL) under argon atmosphere. The reaction mixture was stirred at 60 °C heated by metal sand bath for 20 h. After the solvent was removed under reduced pressure, the residue was purified by silica gel chromatography (PE:EA = 2:1) to afford **3ab**.

#### (7) General procedures for the synthesis of product **3ac**.



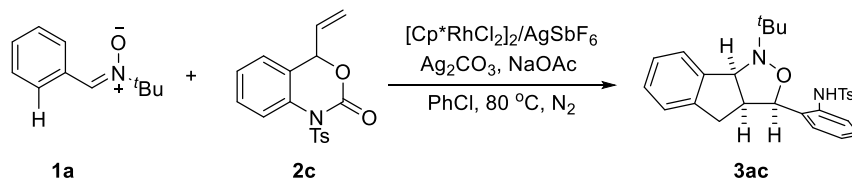

A mixture of **1a** (0.1 mmol),  $[\text{Cp}^*\text{RhCl}_2]_2$  (2.5 mg, 4 mol%),  $\text{Ag}_2\text{CO}_3$  (14 mg, 0.05 mmol) and NaOAc (5 mg, 0.05 mmol) were charged into a reaction tube.  $\text{AgSbF}_6$  (5.5 mg, 16 mol%) was added in a glove box, and then to which were added **2c** (47 mg, 0.15 mmol) and PhCl (1.0 mL) under argon atmosphere. The reaction mixture was stirred at 80 °C heated by metal sand bath for 12 h. After the solvent was removed under reduced pressure, the residue was purified by silica gel chromatography (PE:EA = 6:1) to afford **3ac**.

### (8) General procedures for the synthesis of product 3ad.

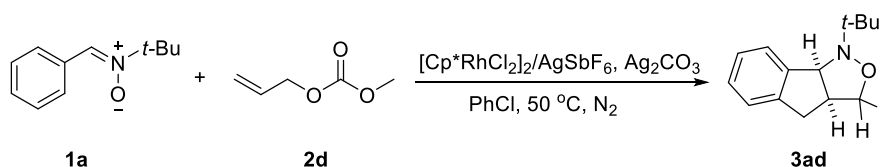

A mixture of **1a** (0.1 mmol),  $[\text{Cp}^*\text{RhCl}_2]_2$  (2.5 mg, 4 mol%), and  $\text{Ag}_2\text{CO}_3$  (14 mg, 0.05 mmol) were charged into a reaction tube.  $\text{AgSbF}_6$  (5.5 mg, 16 mol%) was added in a glove box, and then to which were added **2d** (35 mg, 0.3 mmol) and PhCl (1.0 mL) under argon atmosphere. The reaction mixture was stirred at 50 °C heated by metal sand bath for 12 h. After the solvent was removed under reduced pressure, the residue was purified by silica gel chromatography (PE:EA = 4:1) to afford **3ad**.

### (9) Synthetic transformation of the products.

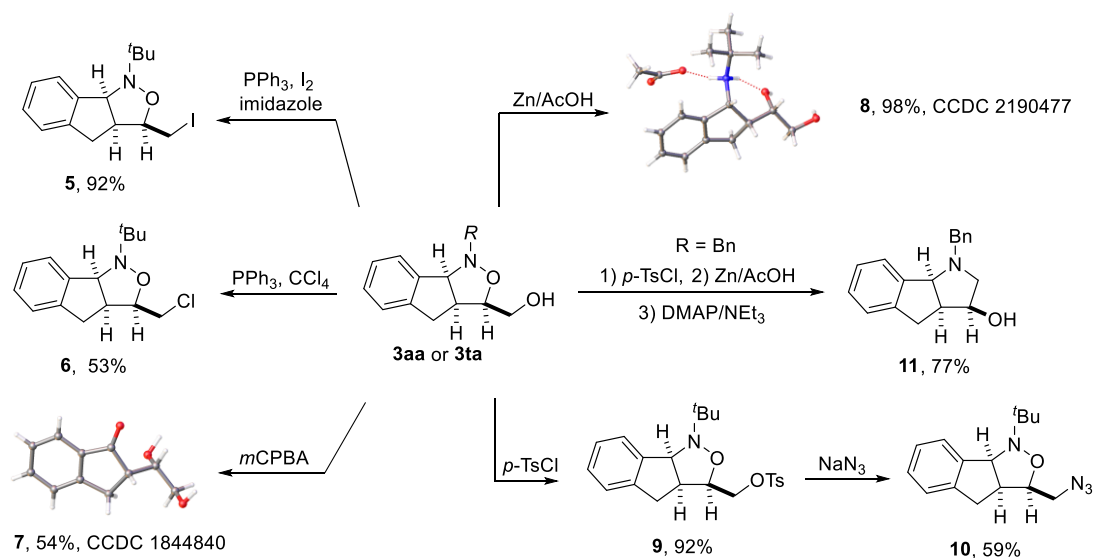

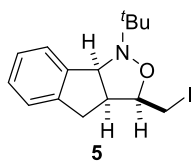

### 1-(tert-butyl)-3-(iodomethyl)-3,3a,4,8b-tetrahydro-1H-indeno[1,2-c]isoxazole

To a solution of **3aa** (0.2 mmol, 50 mg) in toluene (10 mL) was added iodine (0.4 mmol, 103 mg), triphenylphosphine (0.6 mmol, 157 mg) and imidazole (0.6 mmol, 40 mg) under Ar. The solution was heated to reflux for 6 h at 110 °C with stirring. After evaporation of the solvent, the residual oil was purified by silica gel chromatography (PE:EA = 10:1) to give **5** (65 mg, 92%) as a white solid. M.p.:79-83 °C. <sup>1</sup>H NMR (400 MHz, CDCl<sub>3</sub>) δ 7.25 – 7.18 (m, 1H), 7.18 – 7.03 (m, 3H), 4.85 (d, *J* = 7.6 Hz, 1H), 4.58 (dd, *J* = 14.0, 7.2 Hz, 1H), 3.49 (ddd, *J* = 15.6, 7.6, 4.4 Hz, 1H), 3.10 (dd, *J* = 16.8, 4.4 Hz, 1H), 3.05 (dd, *J* = 10.0, 6.0 Hz, 1H), 2.95 (dd, *J* = 16.8, 8.4 Hz, 1H), 2.85 (dd, *J* = 10.0, 8.0 Hz, 1H), 1.19 (s, 9H). <sup>13</sup>C NMR (101 MHz, CDCl<sub>3</sub>) δ 144.0, 142.6, 128.7, 127.8, 125.9, 124.8, 83.1, 70.5, 60.5, 52.0, 32.1, 27.5, 3.0. HRMS (ESI): *m/z* calcd. for [C<sub>15</sub>H<sub>20</sub>NINO, M+Na]<sup>+</sup> : 358.0662; found: 358.0670.

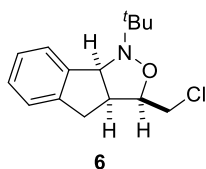

### 1-(tert-butyl)-3-(chloromethyl)-3,3a,4,8b-tetrahydro-1H-indeno[1,2-c]isoxazole

To a solution of **3aa** (0.1 mmol, 25 mg) in Carbon tetrachloride (2 mL) was added triphenylphosphine (0.3 mmol, 80 mg) under Ar. The solution was heated to reflux overnight at 90 °C with stirring. After evaporation of the solvent, the residual oil was purified by silica gel chromatography (PE:EA = 8:1) to give **6** (13 mg, 53%) as a yellow solid. M.p.:53-57 °C. <sup>1</sup>H NMR (600 MHz, ) δ 7.27 – 7.22 (m, 1H), 7.16 – 7.13 (m, 2H), 7.11 (dd, *J* = 8.4, 4.8 Hz, 1H), 4.86 (d, *J* = 7.7 Hz, 1H), 4.48 – 4.44 (m, 1H), 3.52 – 4.47 (m, 3.0 Hz, 1H), 3.36 (dd, *J* = 11.4, 5.4 Hz, 1H), 3.19 (dd, *J* = 10.8, 7.8 Hz, 1H), 3.14 (dd, *J* = 16.8, 3.0 Hz, 1H), 2.97 (dd, *J* = 16.8, 8.4 Hz, 1H), 1.19 (s, 9H). <sup>13</sup>C NMR (101 MHz, CDCl<sub>3</sub>) δ 143.3, 141.8, 128.1, 127.3, 125.4, 124.1, 80.4, 69.5, 59.5, 51.2, 50.4, 31.6, 26.9. HRMS (ESI): *m/z* calcd. for [C<sub>15</sub>H<sub>21</sub>ClNO, M+H]<sup>+</sup> : 266.1306; found: 266.1310.

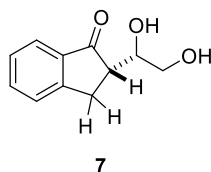

### 2-(1,2-dihydroxyethyl)-2,3-dihydro-1H-inden-1-one

A solution of the **3aa** (50 mg, 0.2 mmol) in diethyl ether (2 mL) was cooled in ice bath, and *m*-Chloroperoxybenzoic acid (138 mg, 0.8 mmol, 4.0 equiv) was added portionwise to the solution under Ar, The clear and blue solution was stirred at this temperature for 2 h and then quenched by addition of an aqueous 10% sodium bicarbonate (2 ml)/10% sodium thiosulfate (2 ml) solution and vigorous stirring for 20 min. The mixture was decanted and extracted with DCM (5 mL), the organic phase was washed with saturated sodium carbonate solution and then with brine, dried (Na<sub>2</sub>SO<sub>4</sub>),

filtered, and concentrated in vacuo to give the crude product, which was used immediately in the next reaction.

The crude product was dissolved in THF (2 mL) with stirring in ice bath, and 2N hydrochloric acid solution (2 mL) was added (exothermic reaction). The solution was stirred in ice bath for 30 min whereupon it was neutralized with saturated sodium carbonate solution and extracted with DCM. The organic phase was washed with water and brine, dried (Na<sub>2</sub>SO<sub>4</sub>), filtered, and concentrated in vacuo. The crude product was purified by silica gel (DCM:Methanol = 20:1) to give **7** as white solid (22 mg, 54%). M.p.:102-104 °C. <sup>1</sup>H NMR (400 MHz, CDCl<sub>3</sub>) δ 7.67 (d, *J* = 7.7 Hz, 1H), 7.59 – 7.48 (m, 1H), 7.41 (d, *J* = 7.6 Hz, 1H), 7.29 (t, *J* = 7.6 Hz, 1H), 4.24 (dt, *J* = 7.2, 4.0 Hz, 1H), 3.72 (dd, *J* = 11.2, 3.6 Hz, 1H), 3.65 (dd, *J* = 11.2, 7.2 Hz, 1H) 3.24 – 3.06 (m, 2H), 2.81 – 2.73 (m, 1H), 2.35 (s, 1H), 1.65 (s, 1H). <sup>13</sup>C NMR (101 MHz, CDCl<sub>3</sub>) δ 207.5, 154.6, 136.7, 135.1, 127.4, 126.6, 123.9, 71.6, 65.3, 50.2, 27.8. HRMS (ESI): *m/z* calcd. for [C<sub>15</sub>H<sub>23</sub>NNaO<sub>2</sub>, M+Na]<sup>+</sup> : 215.0679; found: 215.0679.

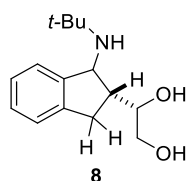

#### 1-(1-(tert-butylamino)-2,3-dihydro-1H-inden-2-yl)ethane-1,2-diol

To a vial under Ar atmosphere were added **3aa** (0.2 mmol, 50 mg.) and THF (1.0 mL). To the mixture were added Zn (2.0 mmol, 130 mg), AcOH (2.0 mL), and H<sub>2</sub>O (1.0 mL). The reaction mixture was stirred at 80 °C overnight. After dried by MgSO<sub>4</sub>, the mixture was filtered through a pad of celite eluting with ethyl acetate, concentrated, and purified by silica gel chromatography (DCM:Methanol = 10:1) to give the indicated product **8** as a white solid (47 mg, 95%). M.p.:123-126 °C. <sup>1</sup>H NMR (400 MHz, CDCl<sub>3</sub>) δ 7.24 – 7.20 (m, 1H), 7.19 – 7.15 (m, 1H), 7.15 – 7.09 (m, 2H), 4.35 (d, *J* = 6.6 Hz, 1H), 4.24 – 4.14 (m, 1H), 3.53 – 3.49 (m, 2H), 3.20 (dd, *J* = 16.0, 10.0 Hz, 1H), 2.63 (dd, *J* = 16.0, 8.0 Hz, 1H), 2.36 – 2.24 (m, 1H), 1.19 (s, 9H). <sup>13</sup>C NMR (101 MHz, CDCl<sub>3</sub>) δ 145.5, 144.0, 127.9, 126.9, 125.3, 124.0, 72.2, 66.3, 60.3, 51.6, 44.9, 29.9, 29.6. HRMS (ESI): *m/z* calcd. for [C<sub>15</sub>H<sub>23</sub>NNaO<sub>2</sub>, M+Na]<sup>+</sup> : 272.1621; found: 272.1610.

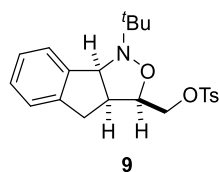

#### (1-(tert-butyl)-3,3a,4,8b-tetrahydro-1H-indeno[1,2-c]isoxazol-3-yl)methyl-4-methylbenzenesulfonate

**3aa** (0.3 mmol), *p*-TsCl (0.45 mmol, 1.5 equiv), and DMAP (0.06 mmol, 0.2 equiv) were taken into a 25 mL round bottom flask and dry DCM (6 mL) was added with stirring under nitrogen atmosphere. The flask was cooled with ice-water and distilled Et<sub>3</sub>N (0.9 mmol, 3.0 equiv) was added. The reaction was allowed to stir for 6h at room temperature. After complete consumption of starting material (monitored by TLC), volatiles were evaporated to dryness and the crude reaction mixture was loaded directly onto silica gel column (PE:EA = 6:1) and purified to give **9** (112 mg, 92%) as a yellow solid. M.p.:78-81 °C. <sup>1</sup>H NMR (400 MHz, CDCl<sub>3</sub>) δ 7.65 (d, *J* = 8.3 Hz, 2H), 7.23 (d, *J* = 8.0 Hz, 2H), 7.20 – 7.15 (m, 1H), 7.13 – 7.05 (m, 2H), 7.01 – 6.89 (m, 1H), 4.78 (d, *J* = 7.6 Hz, 1H), 4.42 (dt, *J* = 7.8, 6.2

Hz, 1H), 3.77 (d,  $J = 6.2$  Hz, 2H), 3.43 – 3.39 (m, 1H), 3.01 – 2.78 (m, 2H), 2.36 (s, 3H), 1.12 (s, 9H).  $^{13}\text{C}$  NMR (101 MHz,  $\text{CDCl}_3$ )  $\delta$  144.9, 143.1, 141.5, 132.7, 129.8, 128.1, 127.9, 127.3, 125.3, 124.1, 78.8, 69.6, 68.9, 59.7, 50.1, 31.5, 26.8, 21.6. HRMS (ESI):  $m/z$  calcd. for  $[\text{C}_{22}\text{H}_{28}\text{NO}_4\text{S}, \text{M}+\text{H}]^+$  : 402.1734; found: 402.1727.

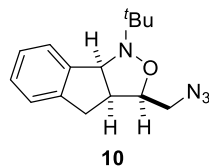

### 3-(azidomethyl)-1-(tert-butyl)-3,3a,4,8b-tetrahydro-1H-indeno[1,2-c]isoxazole

A 10 mL a Schlenk tube was charged with **9** (80 mg, 0.2 mmol, 1 equiv.),  $\text{NaN}_3$  (52 mg, 0.8 mmol, 4 equiv.) and DMF (2 mL). The reaction was allowed to stir overnight at 70 °C. The vial was allowed to cool to room temperature. The solvent was then removed in vacuo and the residue was further purified with flash column chromatography (Hex/EA/DCM = 10:1:3) to give **10** as yellow solid (32 mg, 59%). M.p.: 79-83 °C.  $^1\text{H}$  NMR (400 MHz,  $\text{CDCl}_3$ )  $\delta$  7.28 – 7.22 (m, 1H), 7.17 – 7.12 (m, 2H), 7.10 (dd,  $J = 8.0, 4.0$  Hz, 1H), 4.82 (d,  $J = 8.0$  Hz, 1H), 4.41 – 4.37 (m, 1H), 3.45 – 3.41 (m, 1H), 3.18 (dd,  $J = 12.8, 7.6$  Hz, 1H), 3.04 – 2.88 (m, 3H), 1.20 (s, 9H).  $^{13}\text{C}$  NMR (101 MHz,  $\text{CDCl}_3$ )  $\delta$  143.3, 141.8, 128.2, 127.3, 125.3, 124.1, 82.1, 69.8, 59.8, 50.5, 42.4, 31.5, 26.9. HRMS (ESI):  $m/z$  calcd. for  $[\text{C}_{15}\text{H}_{20}\text{NNaO}, \text{M}+\text{Na}]^+$  : 295.1529; found: 295.1520.

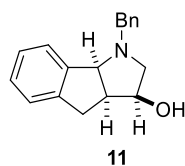

### 1-benzyl-1,2,3,3a,4,8b-hexahydroindeno[1,2-b]pyrrol-3-ol

**3aa** (0.2 mmol), *p*-TsCl (0.3 mmol, 1.5 equiv), and DMAP (0.04 mmol, 0.2 equiv) were taken into a 25 mL round bottom flask and dry DCM (5 mL) was added with stirring under nitrogen atmosphere. The flask was cooled with ice-water and distilled  $\text{Et}_3\text{N}$  (0.6 mmol, 3.0 equiv) was added. The reaction was allowed to stir for 6 h at room temperature. After complete consumption of starting material (monitored by TLC), volatiles were evaporated to dryness and the crude reaction mixture was loaded directly onto silica gel column (PE:EA = 4:1) and purified to give the pure product, which was used immediately in the next reaction.

To a vial under Ar atmosphere were added the above product (0.2 mmol, 1.0 equiv) and THF (1.0 mL). To the mixture were added Zn (2.0 mmol, 130 mg), AcOH (2.0 mL), and  $\text{H}_2\text{O}$  (1.0 mL). The reaction mixture was stirred at 80 °C overnight. After dried by  $\text{MgSO}_4$ , the mixture was filtered through a pad of celite eluting with ethyl acetate, concentrated, and purified by silica gel chromatography (DCM:Methanol = 10:1) to give the product as a white solid, which was used in the next step without further purification.

The above product (0.2 mmol), DMAP (0.1 mmol, 0.5 equiv) were taken into a Schlenk tube and dry DCM (2 mL) was added with stirring under nitrogen atmosphere. The flask was cooled with ice-water and distilled  $\text{Et}_3\text{N}$  (0.6 mmol, 3.0 equiv) was added. The reaction was allowed to stir for 6h at room

temperature. After complete consumption of starting material (monitored by TLC), volatiles were evaporated to dryness and the crude reaction mixture was loaded directly onto silica gel column (Hex/DCM/ Methanol = 10:10:1) and purified to give the pure product **11** as colourless oil (41 mg, 77%). <sup>1</sup>H NMR (400 MHz, CDCl<sub>3</sub>) δ 7.31 – 7.21 (m, 4H), 7.21 – 7.14 (m, 2H), 7.14 – 7.05 (m, 3H), 4.56 (d, *J* = 8.0 Hz, 1H), 3.95 (dd, *J* = 7.2, 4.0 Hz, 1H), 3.89 (d, *J* = 13.2 Hz, 1H), 3.83 (d, *J* = 13.2 Hz, 1H), 3.13 (dd, *J* = 16.8, 9.8 Hz, 1H), 2.92 (ddd, *J* = 10.0, 7.6, 3.6 Hz, 1H), 2.75 (dd, *J* = 16.8, 4.2 Hz, 1H), 2.67 (dd, *J* = 9.8, 4.4 Hz, 1H), 2.51 (dd, *J* = 10.0, 4.0 Hz, 1H), 2.07 (s, 1H). <sup>13</sup>C NMR (101 MHz, CDCl<sub>3</sub>) δ 143.3, 141.3, 139.3, 128.8, 128.4, 127.9, 127.0, 126.3, 125.8, 125.0, 77.8, 70.7, 59.1, 57.3, 50.8, 36.3. HRMS (ESI): *m/z* calcd. for [C<sub>18</sub>H<sub>20</sub>NO, M+H]<sup>+</sup>: 266.1539; found: 266.1539.

## 4. Mechanistic Studies

### (1) H/D Exchange experiment of **1a** with **2a**

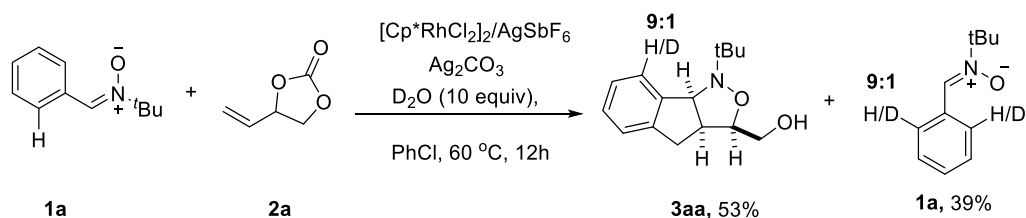

A mixture of **1** (0.1 mmol), [Cp<sup>\*</sup>RhCl<sub>2</sub>]<sub>2</sub> (2.5mg, 4 mol%), and Ag<sub>2</sub>CO<sub>3</sub> (14 mg, 0.05 mmol) were charged into a Schlenk tube. AgSbF<sub>6</sub> (5.5 mg, 16 mol%) was added in a glove box, and then to which were added **2a** (0.015 ml, 0.15 mmol), D<sub>2</sub>O (18.0 mg, 1.0 mmol, 10.0 eq) and dry PhCl (1.0 mL) under argon atmosphere. The reaction mixture was stirred at 60 °C heated in metal sand bath for 12 h. After the solvent was removed under reduced pressure, the residue was purified by silica gel chromatography using PE/EtOAc = (8:1 to 4:1) to afford **3aa** in 53% yield and **1a** in 39% yield. <sup>1</sup>H NMR analysis indicated 10% deuteration at the *ortho* position of **3aa** and 10% deuteration at the *ortho* position of **1a**.

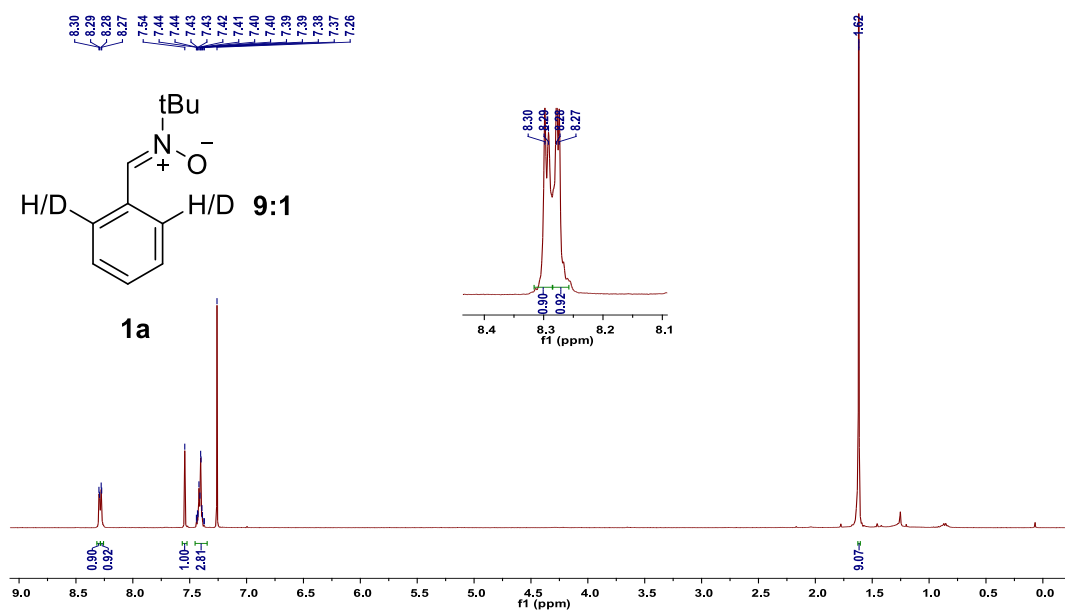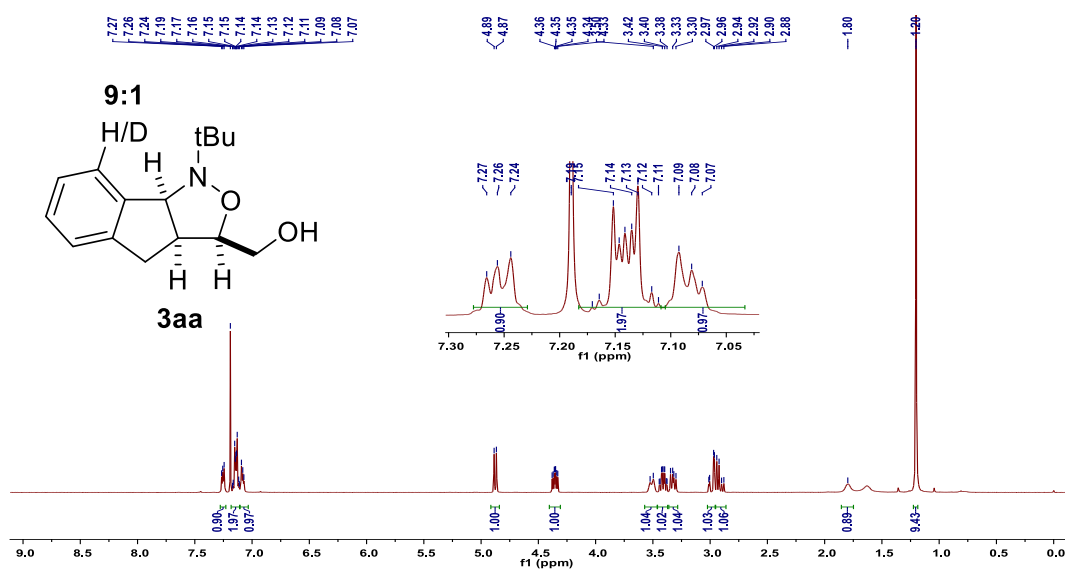

## (2) Determination of Kinetic Isotope Effects

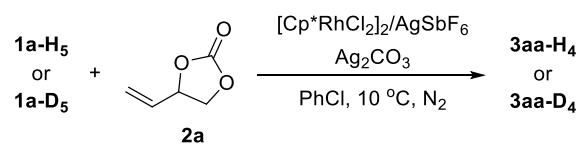

For the cyclization of [**1a-H5**]: a 25-mL a Schlenk tube equipped with a magnetic stir bar was charged with **1a-H5** (17.7 mg, 0.1 mmol, 1.0 eq), [Cp<sup>\*</sup>RhCl<sub>2</sub>]<sub>2</sub> (2.5mg, 4 mol%), and Ag<sub>2</sub>CO<sub>3</sub> (14 mg, 0.05 mmol), AgSbF<sub>6</sub> (5.5 mg, 16 mol%) was added in a glove box, and then to which was added dry PhCl (1.0 mL) under argon atmosphere, the reaction tube stand for 5 minutes in a low temperature reaction bath at 10 °C, and then **2a** was added to the mixture whit striing. After 20 minutes of reaction, the tube was removed from the bath, the resulting solution was filtered through a Celite filter and the solvent was removed under reduced pressure. the resulting mixture were diluted with CDCl<sub>3</sub>, 7 μL of dibromomethane was added and The mixed solution was transferred to an NMR tube and the sample was analyzed by <sup>1</sup>H NMR. The amount of **3aa-H4** was determined by the relative integration of the characteristic signals of dibromomethane and **3aa-H4**, The experiment was repeated at 30, 40, 50 and 60 minutes.

For the cyclization of [**1a-D5**]: a 25-mL a Schlenk tube equipped with a magnetic stir bar was charged with **1a-D5** (18.5 mg, 0.1 mmol, 1.0 eq), [Cp<sup>\*</sup>RhCl<sub>2</sub>]<sub>2</sub> (2.5mg, 4 mol%), and Ag<sub>2</sub>CO<sub>3</sub> (14 mg, 0.05 mmol), AgSbF<sub>6</sub> (5.5 mg, 16 mol%) was added in a glove box, and then to which was added dry PhCl (1.0 mL) under argon atmosphere, the reaction tube stand for 5 minutes in a low temperature reaction bath at 10 °C, and then **2a** was added to the mixture whit striing. After 20 minutes of reaction, the tube was removed from the bath, the resulting solution was filtered through a Celite filter and the solvent was removed under reduced pressure. the resulting mixture were diluted with CDCl<sub>3</sub>, 7 μL of dibromomethane was added and The mixed solution was transferred to an NMR tube and the sample was analyzed by <sup>1</sup>H NMR. The amount of **3aa-D4** was determined by the relative integration of the characteristic signals of dibromomethane and **3aa-D4**, The experiment was repeated at 40, 80, 120 and 170 minutes.

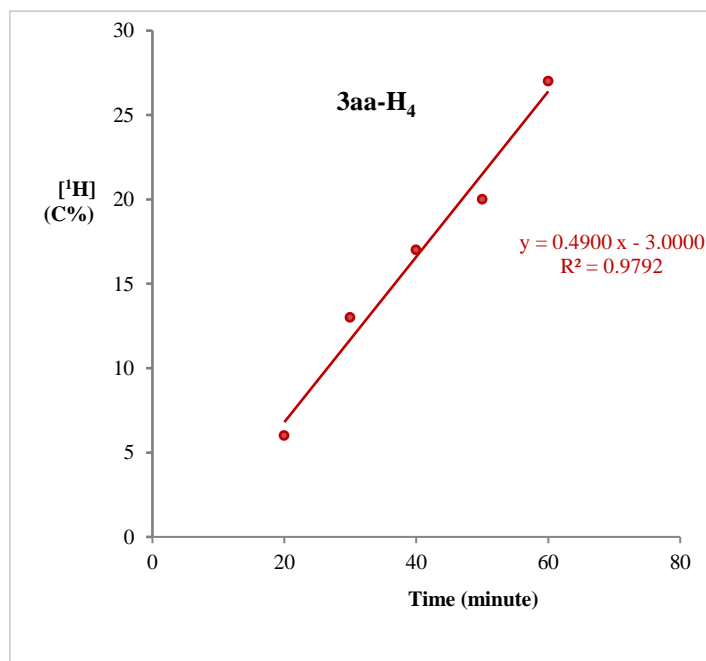

Initial rates determined by plots of [**3aa-H4**] versus time, which gave the value of  $0.4900 \times 10^{-4}$  M/min.

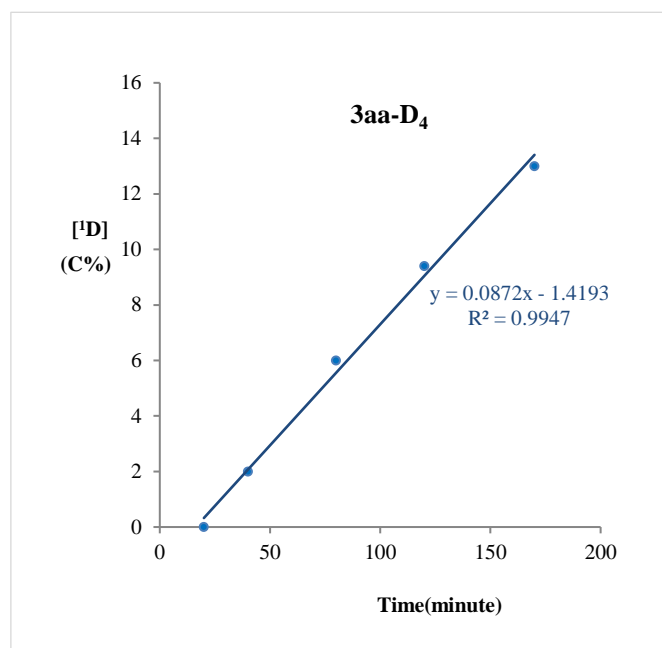

Initial rates determined by plots of [**3aa-D<sub>4</sub>**] versus time, which gave the value of  $0.0872 \times 10^{-4}$  M/min.

The KIE value measured based on the above experiments is **5.6**.

### (3) Verification of the intermediate

#### 1) Experiments using the intermediate as a substrate

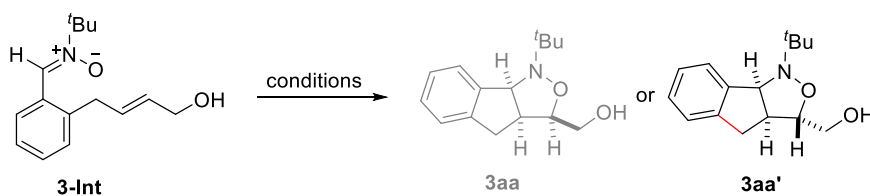

| entry | conditions                                    | yield of 3aa/% | yield of 3aa'/% |
|-------|-----------------------------------------------|----------------|-----------------|
| a     | Ag <sub>2</sub> CO <sub>3</sub> , PhCl, 60 °C | n.d.           | 60              |
| b     | Ag <sub>2</sub> CO <sub>3</sub> , PhCl, r.t.  | n.d.           | 28              |
| c     | PhCl, 60 °C                                   | n.d.           | 50              |
| d     | standard conditons                            | n.d.           | 60              |

standard conditons: **3-Int** (0.1 mmol), [Cp\***RhCl**<sub>2</sub>]<sub>2</sub> (4 mol%), AgSbF<sub>6</sub> (16 mol%), Ag<sub>2</sub>CO<sub>3</sub> (0.05 equiv), PhCl (1.0 mL), 60 °C, 12 h, under Ar, n.d. = no detection. [Cp\***RhCl**<sub>2</sub>]<sub>2</sub> (4 mol%, 2.5 mg),



---

Condition a: A 25 mL Schlenk tube was charged with **3-Int** (25 mg, 0.1 mmol, 1 equiv.), Ag<sub>2</sub>CO<sub>3</sub> (14 mg) and PhCl (1.0 ml). and then the reaction was allowed to stir for 12h at 60 °C under N<sub>2</sub>. the tube was removed from the bath, the resulting solution was filtered through a Celite filter and the solvent was removed under reduced pressure. the resulting mixture were diluted with CDCl<sub>3</sub>, 7 μL of dibromomethane was added and The mixed solution was transferred to an NMR tube and the sample was analyzed by <sup>1</sup>H NMR.

Condition b: A 25 mL Schlenk tube was charged with **3-Int** (25 mg, 0.1 mmol, 1 equiv.), Ag<sub>2</sub>CO<sub>3</sub> (14 mg) and PhCl (1.0 ml). and then the reaction was allowed to stir for 12h at rt under N<sub>2</sub>. the tube was removed from the bath, the resulting solution was filtered through a Celite filter and the solvent was removed under reduced pressure. the resulting mixture were diluted with CDCl<sub>3</sub>, 7 μL of dibromomethane was added and The mixed solution was transferred to an NMR tube and the sample was analyzed by <sup>1</sup>H NMR.

Condition c: A 25 mL Schlenk tube was charged with **3-Int** (25 mg, 0.1 mmol, 1 equiv.) and PhCl (1.0 ml). and then the reaction was allowed to stir for 12h at rt under N<sub>2</sub>. the tube was removed from the bath, the resulting solution was filtered through a Celite filter and the solvent was removed under reduced pressure. the resulting mixture were diluted with CDCl<sub>3</sub>, 7 μL of dibromomethane was added and The mixed solution was transferred to an NMR tube and the sample was analyzed by <sup>1</sup>H NMR.

Condition d: A 25 mL Schlenk tube was charged with **3-Int** (25 mg, 0.1 mmol, 1 equiv.), [Cp\*RhCl<sub>2</sub>]<sub>2</sub> (4 mol%, 2.5 mg), AgSbF<sub>6</sub> (16 mol%, 5.5 mg), Ag<sub>2</sub>CO<sub>3</sub> (14 mg) and PhCl (1.0 ml). and then the reaction was allowed to stir for 12h at 60 °C under N<sub>2</sub>. the tube was removed from the bath, the resulting solution was filtered through a Celite filter and the solvent was removed under reduced pressure. the resulting mixture were diluted with CDCl<sub>3</sub>, 7 μL of dibromomethane was added and The mixed solution was transferred to an NMR tube and the sample was analyzed by <sup>1</sup>H NMR.

## 2) Data analysis for the product 3aa'

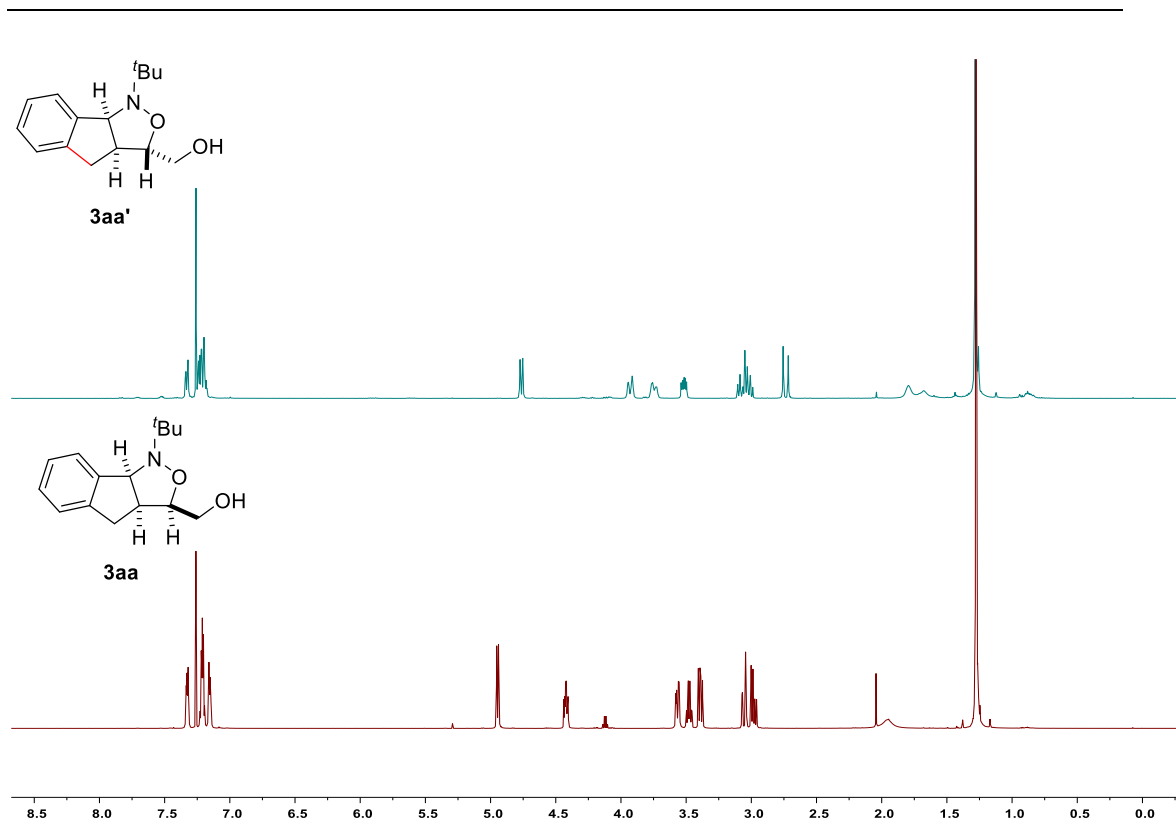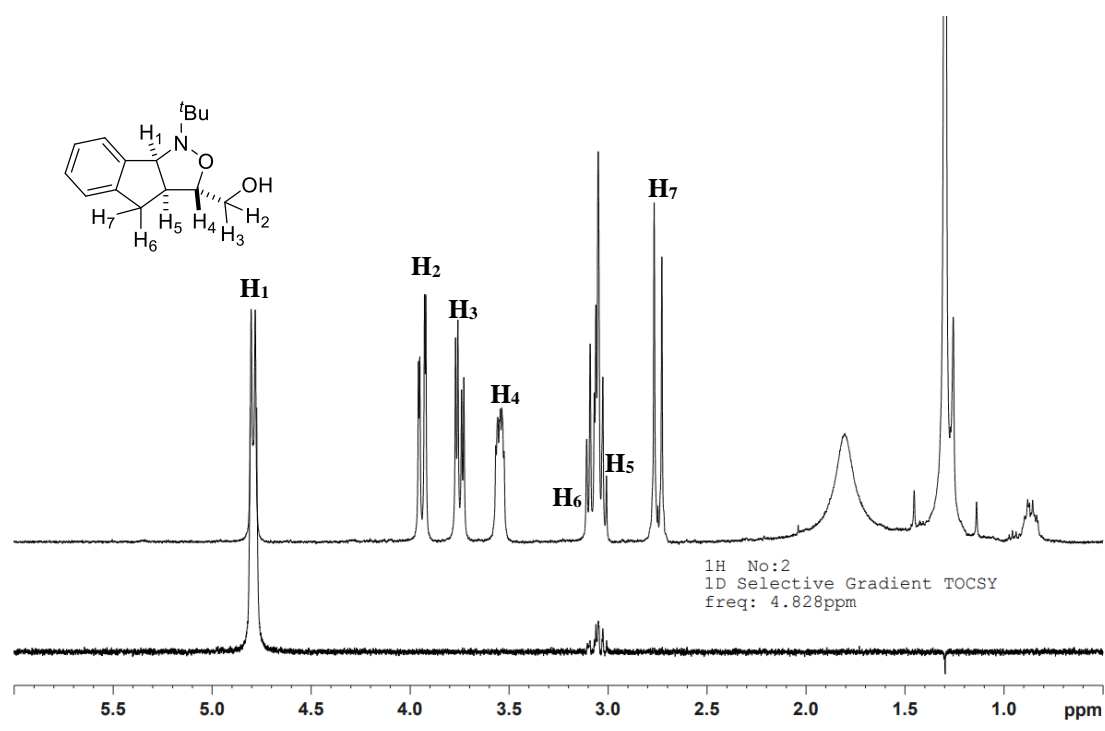

<sup>1</sup>H NMR of H-H tocsy

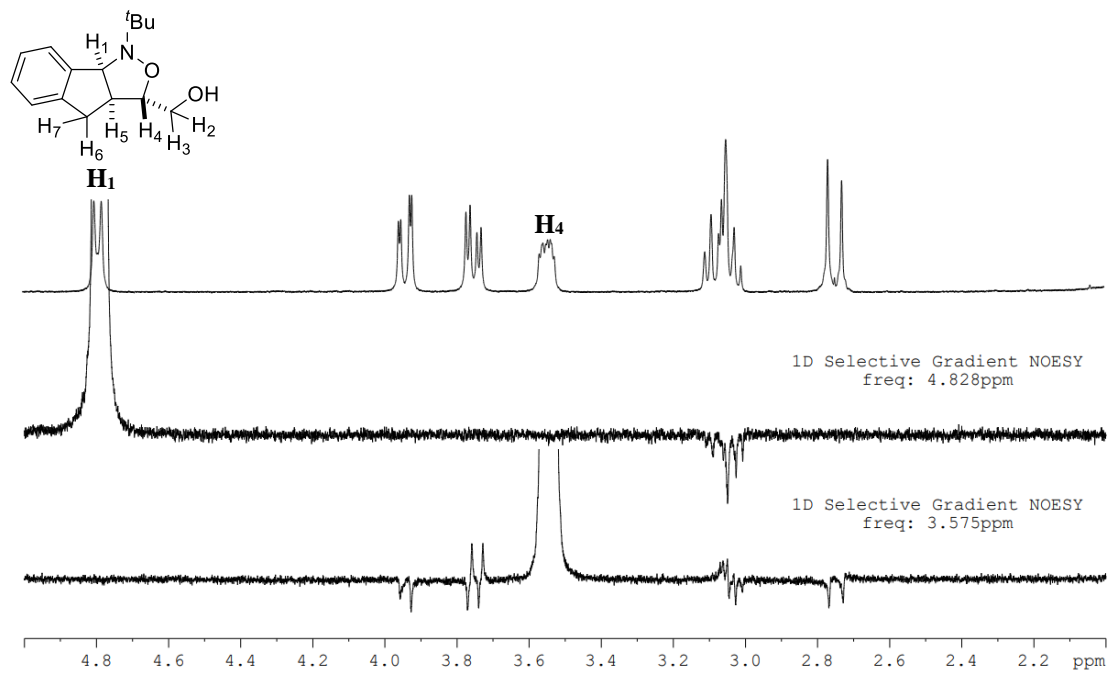

<sup>1</sup>H NMR of H-H noesy

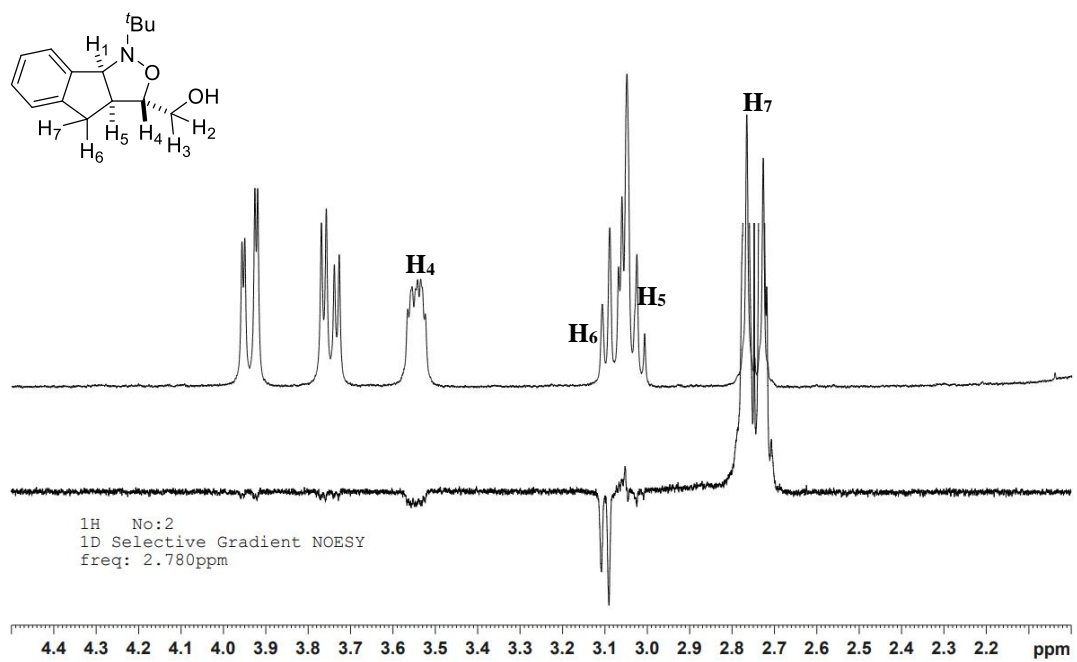

<sup>1</sup>H NMR of H-H noesy

---

## 5. X-Ray Crystal Structures

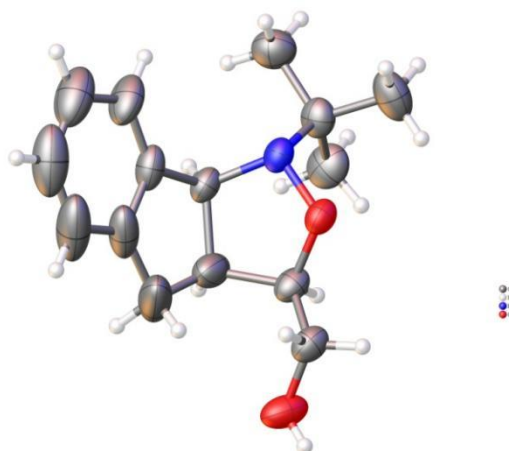

Thermal ellipsoids are set at the 50% probability level.

**Table 1 Crystal data and structure refinement for 3aa.**

|                                        |                                                 |
|----------------------------------------|-------------------------------------------------|
| Identification code                    | 1_sq                                            |
| Empirical formula                      | C <sub>15</sub> H <sub>21</sub> NO <sub>2</sub> |
| Formula weight                         | 247.33                                          |
| Temperature/K                          | 293(2)                                          |
| Crystal system                         | trigonal                                        |
| Space group                            | R-3                                             |
| a/Å                                    | 30.683(2)                                       |
| b/Å                                    | 30.683(2)                                       |
| c/Å                                    | 9.8677(17)                                      |
| $\alpha$ /°                            | 90                                              |
| $\beta$ /°                             | 90                                              |
| $\gamma$ /°                            | 120                                             |
| Volume/Å <sup>3</sup>                  | 8045.5(17)                                      |
| Z                                      | 18                                              |
| $\rho_{\text{calc}}$ /cm <sup>3</sup>  | 0.919                                           |
| $\mu$ /mm <sup>-1</sup>                | 0.480                                           |
| F(000)                                 | 2412.0                                          |
| Crystal size/mm <sup>3</sup>           | 0.23 × 0.21 × 0.18                              |
| Radiation                              | CuK $\alpha$ ( $\lambda$ = 1.54178)             |
| 2 $\theta$ range for data collection/° | 9.986 to 147.364                                |
| Index ranges                           | -22 ≤ h ≤ 37, -28 ≤ k ≤ 23, -12 ≤ l ≤ 11        |

---

|                                                |                                                                  |
|------------------------------------------------|------------------------------------------------------------------|
| Reflections collected                          | 7442                                                             |
| Independent reflections                        | 3440 [ $R_{\text{int}} = 0.0940$ , $R_{\text{sigma}} = 0.1028$ ] |
| Data/restraints/parameters                     | 3440/30/167                                                      |
| Goodness-of-fit on $F^2$                       | 1.039                                                            |
| Final R indexes [ $I \geq 2\sigma(I)$ ]        | $R_1 = 0.0952$ , $wR_2 = 0.2361$                                 |
| Final R indexes [all data]                     | $R_1 = 0.1390$ , $wR_2 = 0.2894$                                 |
| Largest diff. peak/hole / $e \text{ \AA}^{-3}$ | 0.41/-0.53                                                       |

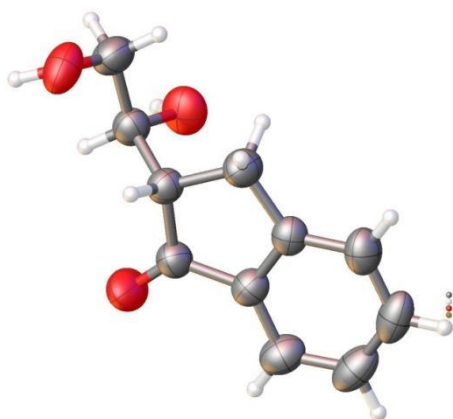

Thermal ellipsoids are set at the 50% probability level.

**Table 1 Crystal data and structure refinement for 7.**

|                                  |                |
|----------------------------------|----------------|
| Identification code              | ZM-2-20220413  |
| Empirical formula                | $C_{11}H_9O_3$ |
| Formula weight                   | 192.22         |
| Temperature/K                    | 293(2)         |
| Crystal system                   | monoclinic     |
| Space group                      | $P2_1/c$       |
| $a/\text{\AA}$                   | 10.3910(3)     |
| $b/\text{\AA}$                   | 8.8427(3)      |
| $c/\text{\AA}$                   | 10.6292(3)     |
| $\alpha/^\circ$                  | 90             |
| $\beta/^\circ$                   | 98.559(3)      |
| $\gamma/^\circ$                  | 90             |
| Volume/ $\text{\AA}^3$           | 965.78(5)      |
| Z                                | 4              |
| $\rho_{\text{calc}}/\text{cm}^3$ | 1.3219         |
| $\mu/\text{mm}^{-1}$             | 0.791          |

|                                             |                                                               |
|---------------------------------------------|---------------------------------------------------------------|
| F(000)                                      | 409.4                                                         |
| Crystal size/mm <sup>3</sup>                | 0.35 × 0.25 × 0.25                                            |
| Radiation                                   | Cu Kα (λ = 1.54184)                                           |
| 2θ range for data collection/°              | 8.6 to 142.44                                                 |
| Index ranges                                | -12 ≤ h ≤ 12, -6 ≤ k ≤ 10, -12 ≤ l ≤ 12                       |
| Reflections collected                       | 3834                                                          |
| Independent reflections                     | 1838 [R <sub>int</sub> = 0.0173, R <sub>sigma</sub> = 0.0236] |
| Data/restraints/parameters                  | 1838/0/143                                                    |
| Goodness-of-fit on F <sup>2</sup>           | 1.060                                                         |
| Final R indexes [I >= 2σ (I)]               | R <sub>1</sub> = 0.0440, wR <sub>2</sub> = 0.1194             |
| Final R indexes [all data]                  | R <sub>1</sub> = 0.0502, wR <sub>2</sub> = 0.1251             |
| Largest diff. peak/hole / e Å <sup>-3</sup> | 0.25/-0.18                                                    |

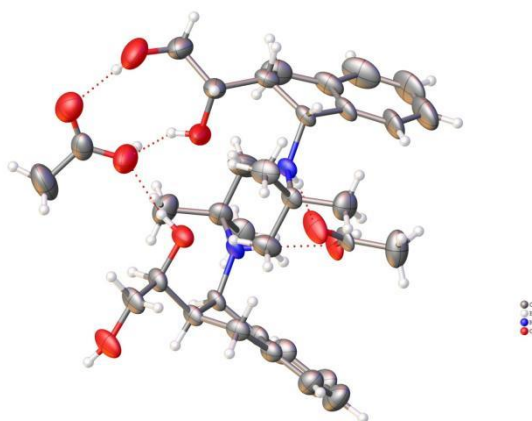

Thermal ellipsoids are set at the 50% probability level.

**Table 1 Crystal data and structure refinement for 8.**

|                     |                                                                 |
|---------------------|-----------------------------------------------------------------|
| Identification code | ZM-1-20220413                                                   |
| Empirical formula   | C <sub>68</sub> H <sub>108</sub> N <sub>4</sub> O <sub>16</sub> |
| Formula weight      | 1237.58                                                         |
| Temperature/K       | 298(2)                                                          |
| Crystal system      | monoclinic                                                      |
| Space group         | P2 <sub>1</sub> /n                                              |
| a/Å                 | 9.0611(2)                                                       |
| b/Å                 | 9.8268(2)                                                       |
| c/Å                 | 38.9367(6)                                                      |
| α/°                 | 90                                                              |
| β/°                 | 93.796(2)                                                       |
| γ/°                 | 90                                                              |

|                                             |                                                               |
|---------------------------------------------|---------------------------------------------------------------|
| Volume/Å <sup>3</sup>                       | 3459.38(12)                                                   |
| Z                                           | 2                                                             |
| ρ <sub>calc</sub> /cm <sup>3</sup>          | 1.188                                                         |
| μ/mm <sup>-1</sup>                          | 0.679                                                         |
| F(000)                                      | 1344.0                                                        |
| Crystal size/mm <sup>3</sup>                | 0.5 × 0.5 × 0.5                                               |
| Radiation                                   | Cu Kα (λ = 1.54184)                                           |
| 2θ range for data collection/°              | 9.104 to 142.95                                               |
| Index ranges                                | -10 ≤ h ≤ 11, -11 ≤ k ≤ 4, -47 ≤ l ≤ 47                       |
| Reflections collected                       | 14315                                                         |
| Independent reflections                     | 6581 [R <sub>int</sub> = 0.0408, R <sub>sigma</sub> = 0.0573] |
| Data/restraints/parameters                  | 6581/9/422                                                    |
| Goodness-of-fit on F <sup>2</sup>           | 1.055                                                         |
| Final R indexes [I ≥ 2σ (I)]                | R <sub>1</sub> = 0.0838, wR <sub>2</sub> = 0.2223             |
| Final R indexes [all data]                  | R <sub>1</sub> = 0.1150, wR <sub>2</sub> = 0.2347             |
| Largest diff. peak/hole / e Å <sup>-3</sup> | 0.62/-0.51                                                    |

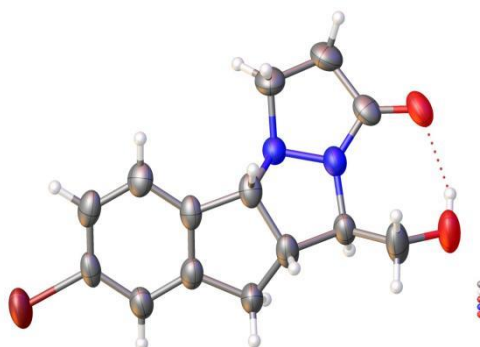

Thermal ellipsoids are set at the 50% probability level.

**Table 1 Crystal data and structure refinement for 4ba.**

|                     |                                                                 |
|---------------------|-----------------------------------------------------------------|
| Identification code | ZM-2-20220510                                                   |
| Empirical formula   | C <sub>14</sub> H <sub>15</sub> BrN <sub>2</sub> O <sub>2</sub> |
| Formula weight      | 323.19                                                          |
| Temperature/K       | 293(2)                                                          |
| Crystal system      | monoclinic                                                      |
| Space group         | P2 <sub>1</sub> /c                                              |
| a/Å                 | 7.18110(10)                                                     |
| b/Å                 | 21.3904(4)                                                      |

|                                             |                                                               |
|---------------------------------------------|---------------------------------------------------------------|
| c/Å                                         | 9.2071(2)                                                     |
| $\alpha$ /°                                 | 90                                                            |
| $\beta$ /°                                  | 107.427(2)                                                    |
| $\gamma$ /°                                 | 90                                                            |
| Volume/Å <sup>3</sup>                       | 1349.36(5)                                                    |
| Z                                           | 4                                                             |
| $\rho_{\text{calc}}$ /cm <sup>3</sup>       | 1.5908                                                        |
| $\mu$ /mm <sup>-1</sup>                     | 4.157                                                         |
| F(000)                                      | 655.0                                                         |
| Crystal size/mm <sup>3</sup>                | 0.1 × 0.1 × 0.1                                               |
| Radiation                                   | Cu K $\alpha$ ( $\lambda$ = 1.54184)                          |
| 2 $\theta$ range for data collection/°      | 8.26 to 142.9                                                 |
| Index ranges                                | -6 ≤ h ≤ 8, -25 ≤ k ≤ 25, -11 ≤ l ≤ 11                        |
| Reflections collected                       | 6467                                                          |
| Independent reflections                     | 2583 [R <sub>int</sub> = 0.0255, R <sub>sigma</sub> = 0.0252] |
| Data/restraints/parameters                  | 2583/0/173                                                    |
| Goodness-of-fit on F <sup>2</sup>           | 1.044                                                         |
| Final R indexes [I ≥ 2 $\sigma$ (I)]        | R <sub>1</sub> = 0.0503, wR <sub>2</sub> = 0.1361             |
| Final R indexes [all data]                  | R <sub>1</sub> = 0.0539, wR <sub>2</sub> = 0.1403             |
| Largest diff. peak/hole / e Å <sup>-3</sup> | 0.64/-1.05                                                    |

## 6. References

- (a) H. Hu, W.-H. Xu, W.-X. Kang, W. Su, R. Sun, X.-H. Wei, M. Sun., *Org. Chem. Front.* 2021, **8**, 4459-4465. (b) B. Song, P. Xie, Y. Li, J. Hao, L. Wang, X. Chen, Z. Xu, Ha. Quan, L. Lou, Y. Xia, K. N. Houk, W. Yang., *J. Am. Chem. Soc.*, 2020, **142**, 9982-9992.
- S. Morales, F. G. Guijarro. I. Alonso, J. L. G. Ruano, M. B. Cid., *ACS Catal.*, 2016, **6**, 84–91.
- (a) H. Kawai, A. Kusuda, S. Nakamura, M. Shiro, N. Shibata., *Angew. Chem. Int. Ed.*, 2009, **48**, 6324-6327. (b) S. E. Winterton, J. M. Ready., *Org. Lett.*, 2016, **18**, 2608-2611.
- (a) S. Vabatino, J. G. Rebelein, T. R. Ward., *J. Am. Chem. Soc.*, 2019, **141**, 17048-17052. (b) S. Raghavan, P. Senapati., *J. Org. Chem.*, 2016, **81**, 6201-6210.
- (a) M. S. M. Pearson, D. R. Carbery., *J. Org. Chem.*, 2009, **74**, 5320–5325. (b) A. R. H. Narayan, G. Jiménez-Osés, P. Liu, S. Negretti, W. Zhao, R. O. Ramabhadra, L. Furan, Z. Li, Y.-F. Yang, M. Gilbert, L. M. Podust, J. Montgomery, K. N. Houk, D. H. Sherman., *Nat. Chem.*, 2015, **7**, 653–660. (c) S. Mukherjee, T. Patra, F. Glorius., *ACS Catal.*, 2018, **87**, 5842–5846. (d) J. Cao, G. Wang, L. Gao, X. Cheng, S. Li., *Chem. Sci.*, 2018, **9**, 3664-3671. (e) J. Yan, H. Cheo, W. Teo, X. Shi, H. Wu, S. B. Idres, L.-W. Deng, J. Wu., *J. Am. Chem. Soc.*, 2020, **142**, 11357–11362. (f) L. -F. Tao, S. Zhang, F. Huang, W.-T. Wang, Z.-H. Luo, L. Qian, J.-Y. Liao., *Angew. Chem. Int. Ed.*, 2022, **61**, e202202679.



## 7. Characterization Data

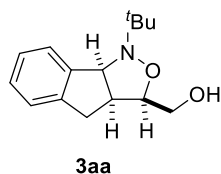

### (1-(tert-butyl)-3,3a,4,8b-tetrahydro-1H-indeno[1,2-c]isoxazol-3-yl)methanol.

Eluent: PE: EA = 4:1, white solid (20.0 mg, 81%, m.p. 81 - 84 °C); <sup>1</sup>H NMR (600 MHz, CDCl<sub>3</sub>) δ 7.37 - 7.29(m, 1H), 7.24 - 7.18 (m, 2H), 7.18 - 7.13 (m, 1H), 4.95 (d, *J* = 8.0 Hz, 1H), 4.42 (m, , 1H), 3.57 (dd, *J* = 11.6, 3.6 Hz, 1H), 4.44 - 4.39 (m, 1H), 3.39 (dd, *J* = 11.4, 7.2 Hz, 1H), 3.06 (dd, *J* = 16.6, 2.4 Hz, 1H), 2.98 (dd, *J* = 16.6, 8.4 Hz, 1H), 1.95 (s, 1H), 1.28 (s, 9H). <sup>13</sup>C NMR (101 MHz, CDCl<sub>3</sub>) δ 143.0, 142.2, 128.1, 127.2, 125.2, 124.0, 82.0, 77.4, 70.1, 62.4, 59.7, 49.2, 31.9, 26.9. HRMS (ESI): *m/z* calcd. for [C<sub>15</sub>H<sub>21</sub>NNaO<sub>2</sub>, M+Na]<sup>+</sup> : 270.1465; found: 270.1457.

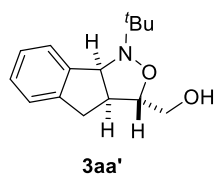

### (1-(tert-butyl)-3,3a,4,8b-tetrahydro-1H-indeno[1,2-c]isoxazol-3-yl)methanol.

Eluent: PE: EA = 4:1, white solid (15.0 mg, 60%, m.p. 107 - 109 °C); <sup>1</sup>H NMR (400 MHz, CDCl<sub>3</sub>) δ 7.40 - 7.32 (m, 1H), 7.27 - 7.18 (m, 3H), 4.79 (d, *J* = 8.2 Hz, 1H), 3.95 (dd, *J* = 12.4, 2.8 Hz, 1H), 3.77 (dd, *J* = 12.4, 4.8 Hz, 1H), 3.55 (ddd, *J* = 9.6, 4.8, 2.8 Hz, 1H), 3.17 - 3.00 (m, 2H), 2.76 (d, *J* = 15.7 Hz, 1H), 1.82 (s, 1H), 1.31 (s, 9H). <sup>13</sup>C NMR (101 MHz, CDCl<sub>3</sub>) δ 144.14, 140.4, 127.9, 127.4, 125.8, 125.2, 82.5, 69.3, 61.9, 58.7, 46.8, 32.8, 26.3. HRMS (ESI): *m/z* calcd. for [C<sub>15</sub>H<sub>21</sub>NNaO<sub>2</sub>, M+Na]<sup>+</sup> : 270.1465; found: 270.1458.

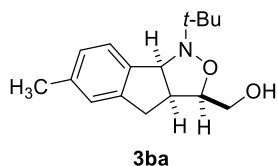

### (1-(tert-butyl)-6-methyl-3,3a,4,8b-tetrahydro-1H-indeno[1,2-c]isoxazol-3-yl)methanol.

Eluent: Ether: DCM = 2:5, white solid (23.0 mg, 88%, m.p. 117 - 120 °C); <sup>1</sup>H NMR (400 MHz, CDCl<sub>3</sub>) δ 7.12 (d, *J* = 7.6 Hz, 1H), 6.95 (d, *J* = 7.6 Hz, 1H), 6.89 (s, 1H), 4.82 (d, *J* = 8.0 Hz, 1H), 4.37 - 4.25 (m, 1H), 3.49 (dd, *J* = 11.6, 3.6 Hz, 1H), 3.39 (ddd, *J* = 16.4, 8.0, 3.6 Hz, 1H), 3.35 - 3.28 (m, 1H), 2.93 (dd, *J* = 16.8, 2.8 Hz, 1H), 2.85 (dd, *J* = 16.8, 8.0 Hz, 1H), 2.24 (s, 3H), 1.88 (s, 1H), 1.19 (s, 9H).

$^{13}\text{C}$  NMR (101 MHz,  $\text{CDCl}_3$ )  $\delta$  142.4, 140.1, 137.8, 128.1, 124.9, 124.6, 81.8, 69.8, 62.5, 59.5, 49.5, 31.7, 26.9, 21.3. HRMS (ESI):  $m/z$  calcd. for  $[\text{C}_{16}\text{H}_{23}\text{NNaO}_2, \text{M}+\text{Na}]^+$  : 284.1621; found: 284.1618.

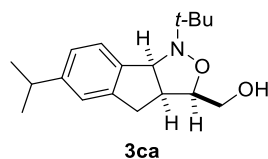

**(1-(tert-butyl)-6-isopropyl-3,3a,4,8b-tetrahydro-1H-indeno[1,2-c]isoxazol-3-yl)methanol.**

Eluent: PE: EA = 4:1, yellow solid (21.1 mg, 73%, m.p. 75 - 78 °C).  $^1\text{H}$  NMR (600 MHz,  $\text{CDCl}_3$ )  $\delta$  7.16 (d,  $J = 7.8$  Hz, 1H), 7.01 (d,  $J = 7.8$  Hz, 1H), 6.93 (s, 1H), 4.83 (d,  $J = 7.8$  Hz, 1H), 4.36 – 4.32 (m, 1H), 3.50 (dd,  $J = 11.4, 3.6$  Hz, 1H), 3.43 – 3.37 (m, 1H), 3.34 (dd,  $J = 11.4, 7.8$  Hz, 1H), 2.95 (dd,  $J = 16.8, 2.4$  Hz, 1H), 2.87 (dd,  $J = 16.8, 8.4$  Hz, 1H), 2.79 (dt,  $J = 13.8, 7.2$  Hz, 1H), 1.97 (s, 1H), 1.19 (s, 9H), 1.14 (d,  $J = 7.2$  Hz, 6H).  $^{13}\text{C}$  NMR (101 MHz,  $\text{CDCl}_3$ )  $\delta$  149.2, 142.4, 140.5, 125.7, 124.9, 121.9, 81.9, 69.8, 62.5, 59.63 (s, 2H), 49.6, 34.1, 31.8, 26.9, 24.2, 24.1. HRMS (ESI):  $m/z$  calcd. for  $[\text{C}_{18}\text{H}_{27}\text{NNaO}_2, \text{M}+\text{Na}]^+$  : 312.1934; found: 312.1926.

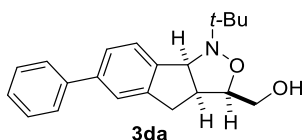

**(1-(tert-butyl)-6-phenyl-3,3a,4,8b-tetrahydro-1H-indeno[1,2-c]isoxazol-3-yl)methanol.**

Eluent: PE: EA = 2:1, white solid (21.3 mg, 65%, m.p. 118 - 120 °C);  $^1\text{H}$  NMR (600 MHz,  $\text{CDCl}_3$ )  $\delta$  7.58 - 7.54 (m, 2H), 7.46 (d,  $J = 7.8$  Hz, 1H), 7.42 (t,  $J = 7.8$  Hz, 2H), 7.39 (d,  $J = 7.8$  Hz, 1H), 7.37 (s, 1H), 7.35 – 7.31 (m, 1H), 4.98 (d,  $J = 7.8$  Hz, 1H), 4.46 – 4.42 (m, 1H), 3.60 (dd,  $J = 11.4, 3.6$  Hz, 1H), 3.54 – 3.49 (m, 1H), 3.45 (dd,  $J = 11.4, 7.8$  Hz, 1H), 3.12 (dd,  $J = 16.8, 2.4$  Hz, 1H), 3.03 (dd,  $J = 16.8, 8.4$  Hz, 1H), 2.07 (s, 1H), 1.30 (s, 9H).  $^{13}\text{C}$  NMR (101 MHz,  $\text{CDCl}_3$ )  $\delta$  143.0, 142.3, 141.4, 141.3, 128.7, 127.2, 128.1, 126.5, 125.5, 122.8, 82.0, 69.8, 62.5, 59.7, 49.6, 31.9, 27.0. HRMS (ESI):  $m/z$  calcd. for  $[\text{C}_{21}\text{H}_{25}\text{NNaO}_2, \text{M}+\text{Na}]^+$  : 351.1778; found: 346.1768.

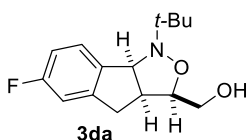

**(1-(tert-butyl)-6-fluoro-3,3a,4,8b-tetrahydro-1H-indeno[1,2-c]isoxazol-3-yl)methanol.**

Eluent: DCM: Methanol = 20:1, colorless oil (15.1 mg, 57%);  $^1\text{H}$  NMR (600 MHz,  $\text{CDCl}_3$ )  $\delta$  7.17 (dd,  $J = 8.4, 5.4$  Hz, 1H), 6.82 (td,  $J = 9.0, 1.8$  Hz, 1H), 6.76 (d,  $J = 8.4$  Hz, 1H), 4.82 (d,  $J = 8.4$  Hz, 1H), 4.39 – 4.25 (m, 1H), 3.48 (dd,  $J = 11.4, 4.8$  Hz, 1H), 3.45 – 3.41 (m, 2.4 Hz, 1H), 3.33 (dd,  $J = 12.0, 6.8$  Hz, 1H), 2.98 (dd,  $J = 16.8, 1.8$  Hz, 1H), 2.87 (dd,  $J = 16.8, 8.4$  Hz, 1H), 2.29 (s, 1H), 1.18 (s, 9H).

<sup>13</sup>C NMR (101 MHz, CDCl<sub>3</sub>) δ 163.1(d, J = 245.8 Hz), 144.6 (d, J = 8.3 Hz), 138.59 (d, J = 1.7 Hz), 126.38 (d, J = 9.0 Hz), 114.2 (d, J = 22.6 Hz), 110.8 (d, J = 22.1 Hz), 82.0, 69.4, 62.2, 59.8, 49.8, 31.9 (d, J = 2.0 Hz), 26.9. <sup>19</sup>F NMR (377 MHz, CDCl<sub>3</sub>) δ -115.25. HRMS (ESI): m/z calcd. for [C<sub>15</sub>H<sub>20</sub>NFNaO<sub>2</sub>, M+Na]<sup>+</sup> : 288.1370; found: 288.1362.

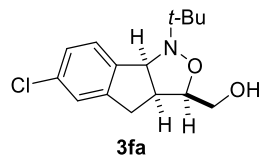

**(1-(tert-butyl)-6-chloro-3,3a,4,8b-tetrahydro-1H-indeno[1,2-c]isoxazol-3-yl)methanol**

Eluent: DCM: Methanol = 20:1, white solid (16.3 mg, 68%, m.p. 88 - 91 °C); <sup>1</sup>H NMR (400 MHz, CDCl<sub>3</sub>) δ 7.17 (d, J = 8.8 Hz, 1H), 7.11 (d, J = 9.2 Hz, 1H), 7.07 (s, 1H), 4.84 (d, J = 7.6 Hz, 1H), 4.46 – 4.29 (m, 1H), 3.52 (dd, J = 11.6, 3.6 Hz, 1H), 3.43 (ddd, J = 16.4, 8.4, 2.8 Hz, 1H), 3.36 (dd, J = 11.6, 7.2 Hz, 1H), 2.99 (dd, J = 16.8, 2.4 Hz, 1H), 2.89 (dd, J = 16.8, 8.4 Hz, 1H), 1.81 (s, 1H), 1.20 (s, 9H). <sup>13</sup>C NMR (101 MHz, CDCl<sub>3</sub>) δ 144.2, 141.6, 133.9, 127.4, 126.3, 124.2, 81.9, 69.5, 62.3, 59.8, 49.4, 31.8, 26.9. HRMS (ESI): m/z calcd. for [C<sub>15</sub>H<sub>20</sub>NCINaO<sub>2</sub>, M+Na]<sup>+</sup> :304.1075; found: 304.1070.

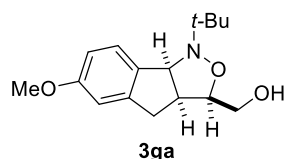

**(1-(tert-butyl)-6-methoxy-3,3a,4,8b-tetrahydro-1H-indeno[1,2-c]isoxazol-3-yl)methanol**

Eluent: PE: EA = 2:1, yellow solid (25.0 mg, 90%, m.p. 109 - 112 °C); <sup>1</sup>H NMR (400 MHz, CDCl<sub>3</sub>) δ 7.14 (d, J = 8.4 Hz, 1H), 6.70 (dd, J = 8.4, 2.4 Hz, 1H), 6.61 (s, 1H), 4.82 (d, J = 8.0 Hz, 1H), 4.36 – 4.32 (m, 1H), 3.70 (s, 3H), 3.52 (dd, J = 11.6, 3.6 Hz, 1H), 3.47 – 3.32 (m, 2H), 2.95 (dd, J = 16.8, 2.8 Hz, 1H), 2.87 (dd, J = 16.8, 8.0 Hz, 1H), 1.91 (s, 1H), 1.19 (s, 9H). <sup>13</sup>C NMR (101 MHz, CDCl<sub>3</sub>) δ 160.1, 143.9, 125.9, 113.6, 108.9, 81.9, 69.5, 62.4, 59.7, 55.4, 49.78, 31.9, 26.9. HRMS (ESI): m/z calcd. for [C<sub>16</sub>H<sub>23</sub>NNaO<sub>3</sub>, M+Na]<sup>+</sup> :300.1570; found: 300.1577.

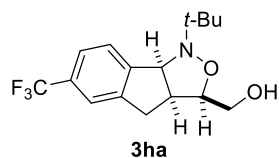

**(1-(tert-butyl)-6-(trifluoromethyl)-3,3a,4,8b-tetrahydro-1H-indeno[1,2-c]isoxazol-3-yl)methanol**

Eluent: PE: EA = 2:1, white solid (17.6 mg, 56%, m.p. 110 - 112 °C); <sup>1</sup>H NMR (600 MHz, CDCl<sub>3</sub>) δ 7.40 (d, J = 7.8 Hz, 1H), 7.35 (d, J = 8.4 Hz, 2H), 4.90 (d, J = 8.4 Hz, 1H), 4.40 – 4.31 (m, 1H), 3.51 (dd, J = 11.4, 4.8 Hz, 1H), 3.49 – 3.45 (m, 1H), 3.33 (dd, J = 12.0, 6.8 Hz, 1H), 3.06 (dd, J = 16.8, 1.8

Hz, 1H), 2.95 (dd,  $J = 16.8, 8.4$  Hz, 1H), 1.96 (s, 1H), 1.20 (s, 9H).  $^{13}\text{C}$  NMR (101 MHz,  $\text{CDCl}_3$ )  $\delta$  147.1, 143.1, 130.5 (q,  $J = 32.3$  Hz), 125.7, 124.4 (q,  $J = 4.0$  Hz), 124.3 (q,  $J = 274.0$  Hz), 121.0 (q,  $J = 7.0$  Hz), 82.1, 69.8, 62.1, 59.9, 49.3, 31.9, 26.9.  $^{19}\text{F}$  NMR (377 MHz,  $\text{CDCl}_3$ )  $\delta$  -62.15 HRMS (ESI):  $m/z$  calcd. For  $[\text{C}_{16}\text{H}_{20}\text{NF}_3\text{NaO}_2, \text{M}+\text{Na}]^+$ : 338.1338; found: 338.1332.

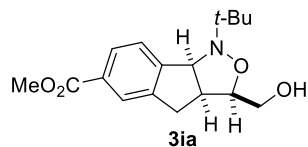

**Methyl-1-(tert-butyl)-3-(hydroxymethyl)-3,3a,4,8b-tetrahydro-1H-indeno[1,2-c]isoxazole-6-carboxylate.**

Eluent: PE: EA = 4:1, brown oil (27.4 mg, 90%);  $^1\text{H}$  NMR (400 MHz,  $\text{CDCl}_3$ )  $\delta$  7.82 (d,  $J = 8.0$  Hz, 1H), 7.76 (s, 1H), 7.30 (d,  $J = 8.0$  Hz, 1H), 4.89 (d,  $J = 8.0$  Hz, 1H), 4.36 (d,  $J = 4.0$  Hz, 1H), 3.82 (s, 3H), 3.50 – 3.41 (m, 2H), 3.31 (dd,  $J = 11.6, 7.2$  Hz, 1H), 3.08 – 3.00 (m, 1H), 2.95 (d,  $J = 8.4$  Hz, 1H), 2.45 (1H), 1.21 (s, 9H).  $^{13}\text{C}$  NMR (101 MHz,  $\text{CDCl}_3$ )  $\delta$  167.1, 148.2, 142.8, 130.2, 128.8, 125.4, 125.2, 82.2, 69.9, 62.1, 60.1, 52.0, 49.4, 31.6, 26.9. HRMS (ESI):  $m/z$  calcd. For  $[\text{C}_{17}\text{H}_{23}\text{NNaO}_4, \text{M}+\text{Na}]^+$ : 328.1519; found: 328.1514.

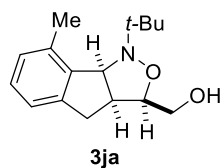

**(1-(tert-butyl)-8-methyl-3,3a,4,8b-tetrahydro-1H-indeno[1,2-c]isoxazol-3-yl)methanol.**

Eluent: PE: EA = 4:1, white solid (20.4 mg, 78%, m.p. 80 - 83 °C);  $^1\text{H}$  NMR (400 MHz,  $\text{CDCl}_3$ )  $\delta$  7.02 (t,  $J = 7.6$  Hz, 1H), 6.89 (t,  $J = 6.8$  Hz, 2H), 5.11 (d,  $J = 7.2$  Hz, 1H), 4.34 (ddd,  $J = 9.6, 7., 3.9$  Hz, 1H), 3.52 (dd,  $J = 11.4, 3.4$  Hz, 1H), 3.39 – 3.25 (m, 2H), 2.96 – 2.80 (m, 2H), 2.42 (s, 3H), 1.75 (s, 1H), 1.23 (s, 9H).  $^{13}\text{C}$  NMR (101 MHz,  $\text{CDCl}_3$ )  $\delta$  142.3, 140.0, 136.1, 129.2, 128.3, 121.4, 82.2, 71.2, 63.2, 61.1, 48.0, 32.1, 27.7, 19.6. HRMS (ESI):  $m/z$  calcd. For  $[\text{C}_{16}\text{H}_{23}\text{NNaO}_2, \text{M}+\text{Na}]^+$ : 284.1621; found: 284.1615.

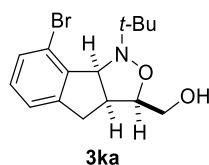

**(8-bromo-1-(tert-butyl)-3,3a,4,8b-tetrahydro-1H-indeno[1,2-c]isoxazol-3-yl)methanol.**

Eluent: PE: EA = 4:1, white solid (21.8 mg, 68%, m.p. 106 - 109 °C);  $^1\text{H}$  NMR (400 MHz,  $\text{CDCl}_3$ )  $\delta$  7.35 (d,  $J = 7.6$  Hz, 1H), 7.13 – 6.99 (m, 2H), 5.16 (d,  $J = 7.2$  Hz, 1H), 4.41 (dd,  $J = 12.4, 6.8$  Hz, 1H),

3.61 (d,  $J = 10.8$  Hz, 1H), 3.50 – 3.35 (m, 2H), 3.06 (d,  $J = 16.8$  Hz, 1H), 2.96 (dd,  $J = 16.8, 8.0$  Hz, 1H), 1.80 (s, 1H), 1.34 (s, 9H).  $^{13}\text{C}$  NMR (101 MHz,  $\text{CDCl}_3$ )  $\delta$  145.3, 140.8, 131.9, 129.8, 122.9, 120.9, 82.0, 72.3, 62.9, 61.6, 48.0, 32.5, 28.0. HRMS (ESI):  $m/z$  calcd. For  $[\text{C}_{15}\text{H}_{20}\text{NBrNaO}_2, \text{M}+\text{Na}]^+$ : 348.0570; found: 348.0570.

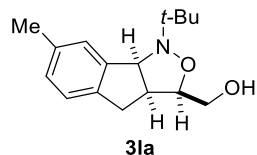

**(1-(tert-butyl)-7-methyl-3,3a,4,8b-tetrahydro-1H-indeno[1,2-c]isoxazol-3-yl)methanol**

Eluent: PE: EA = 4:1, white solid (19.5 mg, 73%, m.p. 130 - 133 °C);  $^1\text{H}$  NMR (600 MHz,  $\text{CDCl}_3$ )  $\delta$  7.13 (s, 1H), 7.02 (q,  $J = 7.8$  Hz, 2H), 4.92 (d,  $J = 7.8$  Hz, 1H), 4.46 – 4.37 (m, 1H), 3.60 – 3.52 (m, 1H), 3.50 – 3.41 (m, 1H), 3.36 (dd,  $J = 11.4, 7.8$  Hz, 1H), 3.04 – 2.90 (m, 2H), 2.33 (s, 3H), 1.83 (s, 1H), 1.27 (s, 9H).  $^{13}\text{C}$  NMR (101 MHz,  $\text{CDCl}_3$ )  $\delta$  143.3, 139.1, 136.8, 129.0, 125.6, 123.7, 82.0, 70.1, 62.6, 59.6, 49.2, 31.5, 27.1, 21.3. HRMS (ESI):  $m/z$  calcd. For  $[\text{C}_{16}\text{H}_{23}\text{NNaO}_2, \text{M}+\text{Na}]^+$ : 284.1621; found: 284.1612.

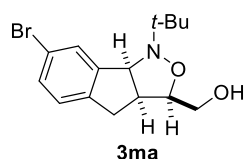

**(7-bromo-1-(tert-butyl)-3,3a,4,8b-tetrahydro-1H-indeno[1,2-c]isoxazol-3-yl)methanol.**

Eluent: PE: EA = 4:1, white solid (24.0 mg, 74%, m.p. 133 - 135 °C);  $^1\text{H}$  NMR (600 MHz,  $\text{CDCl}_3$ )  $\delta$  7.42 (s, 1H), 7.32 (d,  $J = 7.8$  Hz, 1H), 7.02 (d,  $J = 7.8$  Hz, 1H), 4.92 (d,  $J = 7.8$  Hz, 1H), 4.43 – 4.38 (m, 1H), 3.63 – 3.54 (m, 1H), 3.52 – 3.45 (m, 1H), 3.39 (dd,  $J = 11.4, 6.6$  Hz, 1H), 3.01 (d,  $J = 16.8$  Hz, 1H), 2.92 (dd,  $J = 16.8, 8.4$  Hz, 1H), 1.88 (s, 1H), 1.26 (s, 9H).  $^{13}\text{C}$  NMR (101 MHz,  $\text{CDCl}_3$ )  $\delta$  145.7, 141.2, 131.2, 128.4, 125.5, 120.9, 82.0, 69.9, 62.3, 59.7, 49.4, 31.6, 27.0. HRMS (ESI):  $m/z$  calcd. For  $[\text{C}_{15}\text{H}_{20}\text{NBrNaO}_2, \text{M}+\text{Na}]^+$ : 348.0570; found: 348.0561.

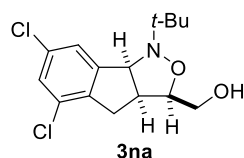

**(1-(tert-butyl)-5,7-dichloro-3,3a,4,8b-tetrahydro-1H-indeno[1,2-c]isoxazol-3-yl)methanol.**

Eluent: PE: EA = 4:1, white solid (17.9 mg, 57%, m.p. 107 - 109 °C);  $^1\text{H}$  NMR (600 MHz,  $\text{CDCl}_3$ )  $\delta$  7.15 (s, 1H), 7.11 (s, 1H), 4.89 (d,  $J = 7.8$  Hz, 1H), 4.38 – 4.33 (m, 1H), 3.54 (dd,  $J = 12.0, 3.6$  Hz, 1H), 3.47 – 3.42 (m, 1H), 3.38 (dd,  $J = 11.4, 6.6$  Hz, 1H), 3.03 (dd,  $J = 17.4, 1.8$  Hz, 1H), 2.85 (dd,  $J = 17.4, 8.4$  Hz, 1H), 1.89 (s, 1H), 1.19 (s, 9H).  $^{13}\text{C}$  NMR (101 MHz,  $\text{CDCl}_3$ )  $\delta$  146.4, 139.2, 133.6, 130.6,

128.0, 124.0, 82.1, 70.6, 62.0, 60.1, 48.8, 30.9, 26.9. HRMS (ESI):  $m/z$  calcd. For  $[C_{15}H_{29}NCl_2NaO_2, M+Na]^+$ : 338.0685; found: 338.0678.

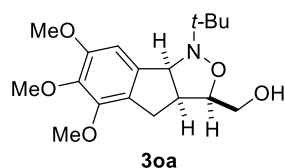

**(1-(tert-butyl)-5,6,7-trimethoxy-3,3a,4,8b-tetrahydro-1H-indeno[1,2-c]isoxazol-3-yl)methanol**

Eluent: PE: EA = 1:2, orange solid (20.0 mg, 59%, m.p. 93 - 96 °C);  $^1H$  NMR (600 MHz,  $CDCl_3$ )  $\delta$  6.54 (s, 1H), 4.83 (d,  $J$  = 7.8 Hz, 1H), 4.40 – 4.30 (m, 1H), 3.80 (s, 3H), 3.79 (s, 3H), 3.74 (s, 3H), 3.54 (dd,  $J$  = 11.4, 4.8 Hz, 1H), 3.43 – 3.35 (m, 2H), 2.96 (dd,  $J$  = 16.8, 1.8 Hz, 1H), 2.79 (dd,  $J$  = 16.8, 8.4 Hz, 1H), 1.89 (s, 1H), 1.19 (s, 9H).  $^{13}C$  NMR (101 MHz,  $CDCl_3$ )  $\delta$  153.7, 148.8, 141.7, 138.6, 126.7, 103.6, 82.2, 70.6, 62.5, 60.9, 60.4, 59.7, 56.0, 49.2, 28.6, 26.9. HRMS (ESI):  $m/z$  calcd. For  $[C_{18}H_{27}NNaO_5, M+Na]^+$ : 360.1781; found: 360.1777.

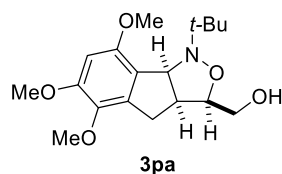

**(1-(tert-butyl)-5,6,8-trimethoxy-3,3a,4,8b-tetrahydro-1H-indeno[1,2-c]isoxazol-3-yl)methanol.**

Eluent: PE: EA = 1:2, yellow solid (28.0 mg, 83%, m.p. 111 - 114 °C);  $^1H$  NMR (400 MHz,  $CDCl_3$ )  $\delta$  6.25 (s, 1H), 5.01 (d,  $J$  = 7.6 Hz, 1H), 4.32 (ddd,  $J$  = 8.8, 6.8, 3.6 Hz, 1H), 3.77 (s, 3H), 3.70 (s, 3H), 3.67 (s, 3H), 3.65 – 3.57 (m, 1H), 3.47 (dd,  $J$  = 10.8, 6.4 Hz, 1H), 3.38 – 3.34 (m, 1H), 3.06 (dd,  $J$  = 17.2, 2.4 Hz, 1H), 2.75 (dd,  $J$  = 17.2, 8.8 Hz, 1H), 1.19 (s, 9H).  $^{13}C$  NMR (101 MHz,  $CDCl_3$ )  $\delta$  153.2, 152.9, 138.3, 137.4, 122.7, 96.6, 81.9, 69.4, 62.8, 60.5, 60.4, 56.5, 55.2, 49.1, 29.3, 27.3. HRMS (ESI):  $m/z$  calcd. For  $[C_{18}H_{27}NNaO_5, M+Na]^+$ : 360.1781; found: 360.1780.

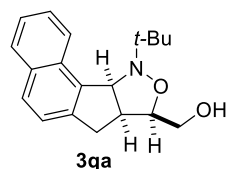

**(10-(tert-butyl)-7a,8,10,10a-tetrahydro-7H-benzo[6,7]indeno[1,2-c]isoxazol-8-yl)methanol.**

Eluent: PE: EA = 4:1, white solid (23.1 mg, 78%, m.p. 86 - 88 °C);  $^1H$  NMR (400 MHz,  $CDCl_3$ )  $\delta$  8.51 (d,  $J$  = 8.4 Hz, 1H), 7.82 (d,  $J$  = 8.0 Hz, 1H), 7.72 (d,  $J$  = 8.4 Hz, 1H), 7.49 (t,  $J$  = 7.2 Hz, 1H), 7.41 (t,  $J$  = 7.2 Hz, 1H), 7.28 (s, 1H), 5.52 (d,  $J$  = 7.2 Hz, 1H), 4.56 – 4.42 (m, 1H), 3.64 (dd,  $J$  = 11.6, 3.6 Hz, 1H), 3.53 (dd,  $J$  = 15.6, 7.6 Hz, 1H), 3.39 (dd,  $J$  = 11.6, 7.2 Hz, 1H), 3.22 – 3.02 (m, 2H), 1.89 (s, 1H),

1.43 (s, 9H). <sup>13</sup>C NMR (101 MHz, CDCl<sub>3</sub>) δ 140.0, 136.2, 133.6, 130.9, 129.4, 128.5, 126.1, 124.9, 124.2, 122.3, 82.4, 71.8, 63.2, 61.2, 48.1, 32.7, 27.9. HRMS (ESI): m/z calcd. For [C<sub>19</sub>H<sub>23</sub>NNaO<sub>2</sub>, M+Na]<sup>+</sup> 320.1621; found: 320.1619.

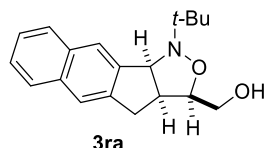

**(1-(tert-butyl)-3,3a,4,10b-tetrahydro-1H-benzo[5,6]indeno[1,2-c]isoxazol-3-yl)methanol.**

Eluent: PE: EA = 4:1, yellow solid (17.0 mg, 57%, m.p. 117 - 119 °C); <sup>1</sup>H NMR (400 MHz, CDCl<sub>3</sub>) δ 7.78 – 7.62 (m, 3H), 7.52 (s, 1H), 7.38 – 7.26 (m, 2H), 4.98 (d, *J* = 8.0 Hz, 1H), 4.42 – 4.37 (m, 1H), 3.55 – 3.40 (m, 2H), 3.26 (dd, *J* = 11.6, 7.6 Hz, 1H), 3.17 – 2.99 (m, 2H), 1.77 (s, 1H), 1.25 (s, 9H). <sup>13</sup>C NMR (101 MHz, CDCl<sub>3</sub>) δ 142.5, 140.8, 133.9, 133.3, 128.2, 127.4, 125.6, 125.1, 124.0, 122.2, 81.9, 69.5, 62.5, 59.8, 49.7, 31.5, 27.0. HRMS (ESI): m/z calcd. For [C<sub>19</sub>H<sub>23</sub>NNaO<sub>2</sub>, M+Na]<sup>+</sup> 320.1621; found: 320.1610.

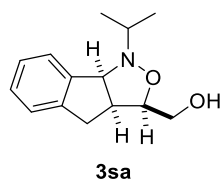

**(1-isopropyl-3,3a,4,8b-tetrahydro-1H-indeno[1,2-c]isoxazol-3-yl)methanol**

Eluent: PE: EA = 2:1, white solid (20.1 mg, 86%, m.p. 78 - 81 °C); <sup>1</sup>H NMR (400 MHz, CDCl<sub>3</sub>) δ 7.31 – 7.23 (m, 1H), 7.17 – 7.11 (m, 2H), 7.11 – 7.05 (m, 1H), 4.87 (d, *J* = 7.6 Hz, 1H), 4.24 (ddd, *J* = 8.4, 6.8, 3.6 Hz, 1H), 3.69 (dd, *J* = 11.6, 3.6 Hz, 1H), 3.53 (dd, *J* = 11.6, 6.6 Hz, 1H), 3.40 (ddd, *J* = 16.4, 8.4, 2.6 Hz, 1H), 3.06 – 2.96 (m, 2H), 2.90 (dd, *J* = 16.8, 8.6 Hz, 1H), 1.73 (s, 1H), 1.18 (d, *J* = 6.2 Hz, 3H), 1.15 (d, *J* = 6.2 Hz, 3H). <sup>13</sup>C NMR (101 MHz, CDCl<sub>3</sub>) δ 142.7, 142.1, 128.2, 127.1, 125.1, 124.1, 78.7, 74.1, 61.9, 54.1, 46.6, 31.9, 21.3, 20.1. HRMS (ESI): m/z calcd. For [C<sub>14</sub>H<sub>19</sub>NNaO<sub>2</sub>, M+Na]<sup>+</sup> 256.1308; found: 256.1305.

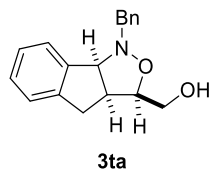

**(1-benzyl-3,3a,4,8b-tetrahydro-1H-indeno[1,2-c]isoxazol-3-yl)methanol**

Eluent: PE: EA = 4:1, colorless oil (23.4 mg, 83%); <sup>1</sup>H NMR (600 MHz, CDCl<sub>3</sub>) δ 7.40 (d, *J* = 7.8 Hz, 2H), 7.30 (t, *J* = 7.8 Hz, 2H), 7.23 (t, *J* = 7.2 Hz, 1H), 7.16 – 7.11 (m, 1H), 7.11 – 7.07 (m, 3H), 4.69 (d,

$J = 7.8$  Hz, 1H), 4.45 (ddd,  $J = 8.4, 6.0, 3.6$  Hz, 1H), 4.15 (d,  $J = 12.6$  Hz, 1H), 3.99 (d,  $J = 12.6$  Hz, 1H), 3.72 (dd,  $J = 11.4, 3.6$  Hz, 1H), 3.62 – 3.48 (m, 2H), 3.06 (dd,  $J = 16.8, 2.4$  Hz, 1H), 2.92 (dd,  $J = 16.8, 9.0$  Hz, 1H), 1.83 (s, 1H).  $^{13}\text{C}$  NMR (101 MHz,  $\text{CDCl}_3$ )  $\delta$  143.1, 141.1, 137.1, 129.2, 128.5, 128.4, 127.6, 126.9, 125.1, 124.2, 79.0, 76.1, 62.2, 61.3, 46.6, 31.9. HRMS (ESI):  $m/z$  calcd. For  $[\text{C}_{18}\text{H}_{19}\text{NNaO}_2, \text{M}+\text{Na}]^+$  304.1308 found: 304.1301.

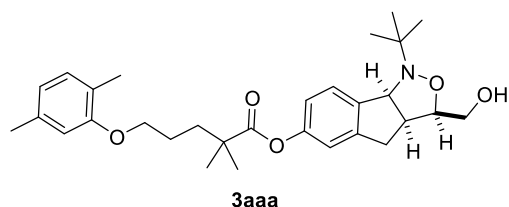

**1-(tert-butyl)-3-(hydroxymethyl)-3,3a,4,8b-tetrahydro-1H-indeno[1,2-c]isoxazol-6-yl-5-(2,5-dimethylphenoxy)-2,2-dimethylpentanoate**

Eluent: PE: EA = 4:1, white solid (35.0 mg, 65%, m.p. 78 - 81 °C);  $^1\text{H}$  NMR (400 MHz,  $\text{CDCl}_3$ )  $\delta$  7.22 (d,  $J = 8.0$  Hz, 1H), 6.93 (d,  $J = 7.6$  Hz, 1H), 6.79 (dd,  $J = 8.0, 2.0$  Hz, 1H), 6.75 (s, 1H), 6.59 (d,  $J = 7.6$  Hz, 1H), 6.56 (s, 1H), 4.84 (d,  $J = 8.0$  Hz, 1H), 4.35 (ddd,  $J = 8.4, 7.6, 3.7$  Hz, 1H), 3.91 (d,  $J = 2.8$  Hz, 2H), 3.52 (dd,  $J = 11.6, 3.6$  Hz, 1H), 3.45 – 3.41 (m, 1H), 3.35 (dd,  $J = 11.6, 7.2$  Hz, 1H), 2.93 (qd,  $J = 16.8, 5.2$  Hz, 2H), 2.23 (s, 3H), 2.10 (s, 3H), 1.80 (d,  $J = 2.8$  Hz, 4H), 1.64 (s, 1H), 1.28 (s, 6H), 1.19 (s, 9H).  $^{13}\text{C}$  NMR (101 MHz,  $\text{CDCl}_3$ )  $\delta$  176.5, 156.9, 151.2, 143.7, 136.5, 130.3, 125.9, 123.6, 120.7, 120.4, 117.2, 112.0, 81.9, 69.6, 67.8, 62.4, 59.7, 49.6, 42.4, 37.2, 31.8, 26.9, 25.3, 25.2, 25.1, 21.4, 15.8. HRMS (ESI):  $m/z$  calcd. For  $[\text{C}_{30}\text{H}_{42}\text{NO}_5, \text{M}+\text{H}]^+$  496.3057, found: 496.3070.

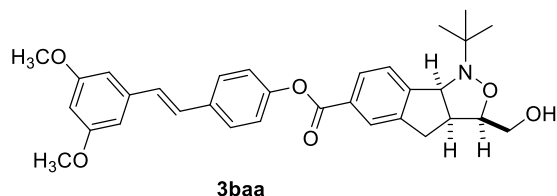

**4-((E)-3,5-dimethoxystyryl)phenyl-1-(tert-butyl)-3-(hydroxymethyl)-3,3a,4,8b-tetrahydro-1H-indeno[1,2-c]isoxazole-6-carboxylate**

Eluent: PE: EA = 1:1, yellow solid (15.0 mg, 28%, m.p. 111 - 114 °C);  $^1\text{H}$  NMR (400 MHz,  $\text{CDCl}_3$ )  $\delta$  8.00 (d,  $J = 8.0$  Hz, 1H), 7.93 (s, 1H), 7.48 (d,  $J = 8.8$  Hz, 2H), 7.38 (d,  $J = 8.0$  Hz, 1H), 7.14 (d,  $J = 8.8$  Hz, 2H), 7.02 (d,  $J = 16.4$  Hz, 1H), 6.93 (d,  $J = 16.4$  Hz, 1H), 6.60 (d,  $J = 2.4$  Hz, 2H), 6.33 (t,  $J = 2.4$  Hz, 1H), 4.92 (d,  $J = 8.0$  Hz, 1H), 4.38 (ddd,  $J = 8.4, 7.2, 3.6$  Hz, 1H), 3.76 (s, 6H), 3.61 – 3.44 (m, 2H), 3.36 (dd,  $J = 11.6, 6.8$  Hz, 1H), 3.10 (dd,  $J = 16.8, 2.0$  Hz, 1H), 3.00 (dd,  $J = 17.0, 8.3$  Hz, 1H), 1.74 (s, 1H), 1.22 (s, 9H).  $^{13}\text{C}$  NMR (101 MHz,  $\text{CDCl}_3$ )  $\delta$  165.2, 161.0, 150.5, 149.5, 142.9, 139.3, 134.9, 129.4, 128.9, 128.3, 127.5, 125.9, 125.4, 121.9, 104.6, 100.1, 82.0, 69.9, 62.3, 59.8, 55.4, 49.3,



31.8, 27.0. HRMS (ESI):  $m/z$  calcd. For  $[C_{32}H_{36}NO_6, M+H]^+$  530.2537, found: 530.2525.

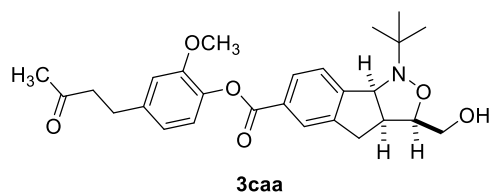

**2-methoxy-4-(3-oxobutyl)phenyl-1-(tert-butyl)-3-(hydroxymethyl)-3,3a,4,8b-tetrahydro-1H-indeno[1,2-c]isoxazole-6-carboxylate**

<sup>1</sup> Eluent: DCM: Methanol = 20:1, yellow oil (15.0 mg, 28%); <sup>1</sup>H NMR (400 MHz, CDCl<sub>3</sub>) δ 7.99 (d,  $J$  = 8.0 Hz, 1H), 7.93 (s, 1H), 7.36 (d,  $J$  = 8.0 Hz, 1H), 6.96 (d,  $J$  = 8.0 Hz, 1H), 6.76 (s, 1H), 6.71 (d,  $J$  = 8.0 Hz, 1H), 4.91 (d,  $J$  = 8.0 Hz, 1H), 4.46 – 4.31 (m, 1H), 3.71 (s, 3H), 3.58 – 3.44 (m, 2H), 3.35 (dd,  $J$  = 11.2, 7.2 Hz, 1H), 3.08 (d,  $J$  = 16.8 Hz, 1H), 2.98 (dd,  $J$  = 16.8, 8.0 Hz, 1H), 2.83 (t,  $J$  = 7.6 Hz, 2H), 2.71 (t,  $J$  = 7.2 Hz, 2H), 2.08 (s, 3H), 1.80 (s, 1H), 1.21 (s, 9H). <sup>13</sup>C NMR (101 MHz, CDCl<sub>3</sub>) δ 207.7, 164.9, 151.1, 149.2, 142.8, 140.0, 138.3, 129.6, 129.4, 126.1, 125.3, 122.8, 120.4, 112.8, 81.9, 69.9, 62.3, 59.8, 55.9, 49.3, 45.2, 31.7, 30.1, 29.6, 27.0. HRMS (ESI):  $m/z$  calcd. For  $[C_{27}H_{33}NNaO_6, M+Na]^+$  490.2200, found: 490.2194.

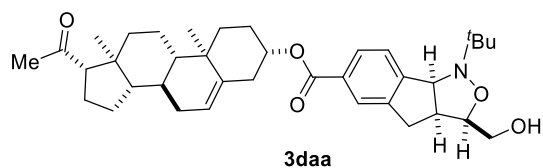

**(3S,8S,9S,10R,13S,14S,17S)-17-acetyl-10,13-dimethyl-2,3,4,7,8,9,10,11,12,13,14,15,16,17-tetradecahydro-1H-cyclopenta[a]phenanthren-3-yl-1-(tert-butyl)-3-(hydroxymethyl)-3,3a,4,8b-tetrahydro-1H-indeno[1,2-c]isoxazole-6-carboxylate**

Eluent: PE: EA = 2:1, white solid (42.0 mg, 72%); Following the general procedure, the product (42.0 mg) was obtained in 72% yield as an inseparable mixture of 2 diastereomers (1:1, estimated by HPLC with a Daicel Chiralpak AD-H, n-hexane/2-propanol = 80/20,  $v = 1.0 \text{ mL}\cdot\text{min}^{-1}$ ,  $\lambda = 254 \text{ nm}$ ,  $t_1 = 6.8 \text{ min}$ ,  $t_2 = 12.7 \text{ min}$ ; signals of the 2 isomers cannot be distinguished by <sup>1</sup>H NMR). <sup>1</sup>H NMR (400 MHz, CDCl<sub>3</sub>) δ 7.83 (d,  $J$  = 8.0 Hz, 1H), 7.76 (s, 1H), 7.30 (d,  $J$  = 8.0 Hz, 1H), 5.34 (d,  $J$  = 4.4 Hz, 1H), 4.88 (d,  $J$  = 8.0 Hz, 1H), 4.77 (ddd,  $J$  = 16.2, 9.0, 4.6 Hz, 1H), 4.36 (dd,  $J$  = 3.8, 1.2 Hz, 1H), 3.59 – 3.40 (m, 2H), 3.34 (dd,  $J$  = 11.6, 7.2 Hz, 1H), 3.03 (dd,  $J$  = 17.2, 2.0 Hz, 1H), 2.97 (d,  $J$  = 16.8, 8.4 Hz, 1H), 2.47 (t,  $J$  = 8.8 Hz, 1H), 2.39 (d,  $J$  = 7.6 Hz, 2H), 2.16 – 2.07 (m, 1H), 2.06 (s, 3H), 1.99 (dd,  $J$  = 8.4, 2.4 Hz, 1H), 1.97 – 1.88 (m, 2H), 1.85 (dt,  $J$  = 13.6, 3.2 Hz, 1H), 1.78 (s, 1H), 1.70 – 1.51 (m, 5H), 1.47 – 1.32 (m, 3H), 1.20 (s, 9H), 1.18 – 1.04 (m, 3H), 1.00 (s, 3H), 0.97 – 0.92 (m, 1H), 0.57 (s, 3H). <sup>13</sup>C NMR (151 MHz, CDCl<sub>3</sub>) δ 209.6, 166.1, 142.5, 139.7, 130.8, 128.8, 125.3, 125.1, 122.4, 82.0, 74.4, 69.9, 63.7, 62.3, 59.8, 56.8, 49.9, 49.3, 44.0, 38.8, 38.1, 37.1, 36.7, 31.9, 31.8, 31.7, 31.6, 27.8, 27.0, 24.5, 22.8, 21.0, 19.4, 13.2. HRMS (ESI):  $m/z$  calcd. For  $[C_{37}H_{52}NO_5, M+H]^+$  590.3840, found: 590.3850.

<Chromatogram>

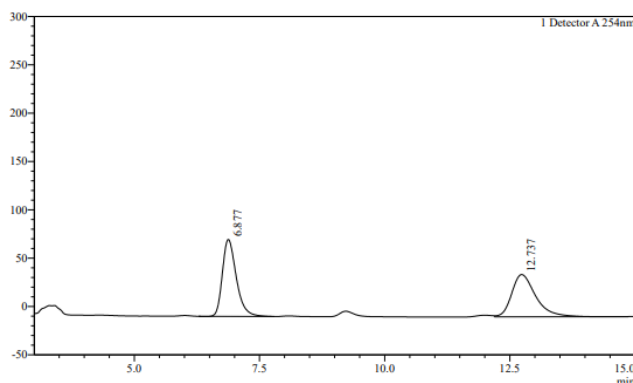

<Peak Table>

| Peak# | Ret. Time | Area    | Height | Conc.  | Area%   |
|-------|-----------|---------|--------|--------|---------|
| 1     | 6.877     | 1539407 | 79606  | 51.344 | 51.344  |
| 2     | 12.737    | 1458817 | 43785  | 48.656 | 48.656  |
| Total |           | 2998223 | 123391 |        | 100.000 |

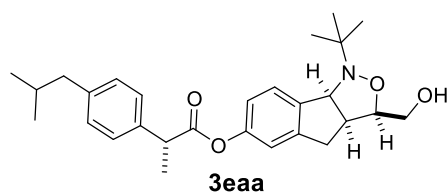

**1-(tert-butyl)-3-(hydroxymethyl)-3,3a,4,8b-tetrahydro-1H-indeno[1,2-c]isoxazol-6-yl-(2R)-2-(4-isobutylphenyl)propanoate**

Eluent: PE: EA = 2:1, white solid (21.0 mg, 46%); Following the general procedure, the product (21.0 mg) was obtained in 46% yield as an inseparable mixture of 2 diastereomers (1:1, estimated by <sup>1</sup>H NMR). <sup>1</sup>H NMR (400 MHz, CDCl<sub>3</sub>) δ 7.25 – 7.17 (m, 3H), 7.06 (d, *J* = 8.0 Hz, 2H), 6.80 – 6.65 (m, 2H), 4.81 (d, *J* = 8.0 Hz, 1H), 4.37 – 4.25 (m, 1H), 3.83 (q, *J* = 7.2 Hz, 1H), 3.48 (ddd, *J* = 11.6, 5.2, 4.0 Hz, 1H), 3.45 – 3.36 (m, 1H), 3.32 (dt, *J* = 11.6, 7.2 Hz, 1H), 3.02 – 2.80 (m, 2H), 2.39 (d, *J* = 7.2 Hz, 2H), 1.87 – 1.72 (m, 1H), 1.55 – 1.47 (m, 2H), 1.17 (s, 9H), 0.84 (d, *J* = 6.8 Hz, 6H). <sup>13</sup>C NMR (101 MHz, CDCl<sub>3</sub>) δ 173.41, 173.38, 151.01, 143.70, 140.79, 140.59, 140.57, 137.29, 137.26, 129.51, 127.22, 125.83, 120.43, 120.33, 117.11, 117.06, 81.9, 69.54, 62.39, 59.68, 49.65, 49.61, 45.27, 45.25, 45.06, 31.84, 30.19, 26.96, 22.4, 18.57. HRMS (ESI): *m/z* calcd. For [C<sub>28</sub>H<sub>37</sub>NNaO<sub>4</sub>, M+Na]<sup>+</sup> 474.2615, found: 474.2607.

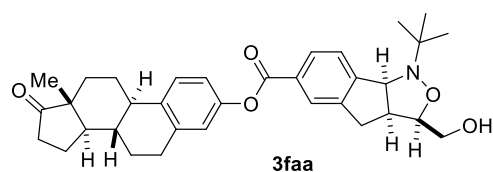

**(8S,9R,13R,14R)-13-methyl-17-oxo-7,8,9,11,12,13,14,15,16,17-decahydro-6H-cyclopenta[a]phenanthren-3-yl-(3R)-1-(tert-butyl)-3-(hydroxymethyl)-3,3a,4,8b-tetrahydro-1H-indeno[1,2-c]isoxazole-6-carboxylate**

Eluent: PE: EA = 1:1, white solid (39.4 mg, 76%); Following the general procedure, the product (39.4 mg) was obtained in 76% yield as an inseparable mixture of 2 diastereomers (1:1, estimated by HPLC with a Daicel Chiralpak AD-H, n-hexane/2-propanol = 80/20,  $v = 1.0 \text{ mL}\cdot\text{min}^{-1}$ ,  $\lambda = 254 \text{ nm}$ ,  $t_1 = 17.3 \text{ min}$ ,  $t_2 = 31.3 \text{ min}$ ; signals of the 2 isomers cannot be distinguished by  $^1\text{H NMR}$ ).  $^1\text{H NMR}$  (400 MHz,  $\text{CDCl}_3$ )  $\delta$  8.05 (d,  $J = 8.0 \text{ Hz}$ , 1H), 7.98 (s, 1H), 7.44 (d,  $J = 8.0 \text{ Hz}$ , 1H), 7.32 (d,  $J = 8.0 \text{ Hz}$ , 1H), 6.97 (dd,  $J = 8.4, 2.4 \text{ Hz}$ , 1H), 6.94 (d,  $J = 1.6 \text{ Hz}$ , 1H), 4.99 (d,  $J = 8.0 \text{ Hz}$ , 1H), 4.5 - 4.4 (m, 1H), 3.67 - 3.50 (m, 2H), 3.43 (dd,  $J = 11.6, 6.8 \text{ Hz}$ , 1H), 3.20 - 3.12 (m, 1H), 3.10 - 3.02 (m, 1H), 2.99 - 2.87 (m, 2H), 2.56 - 2.46 (m, 1H), 2.45 - 2.38 (m, 1H), 2.36 - 2.46 (m, 1H), 2.21 - 2.04 (m, 2H), 2.03 - 1.92 (m, 2H), 1.70 - 1.54 (m, 4H), 1.50 - 1.43 (m, 2H), 1.29 (s, 9H), 0.92 (s, 3H).  $^{13}\text{C NMR}$  (151 MHz,  $\text{CDCl}_3$ )  $\delta$  220.5, 165.6, 148.9, 143.0, 138.2, 137.5, 129.7, 129.5, 126.5, 126.0, 125.5, 121.8, 119.0, 82.1, 70.1, 62.4, 60.0, 50.5, 49.4, 48.1, 44.3, 38.1, 35.9, 31.9, 31.7, 29.5, 27.1, 26.5, 25.9, 21.7, 13.9. HRMS (ESI):  $m/z$  calcd. For  $[\text{C}_{34}\text{H}_{42}\text{NO}_5, \text{M}+\text{H}]^+$  544.3057, found: 544.3052.

<Chromatogram>

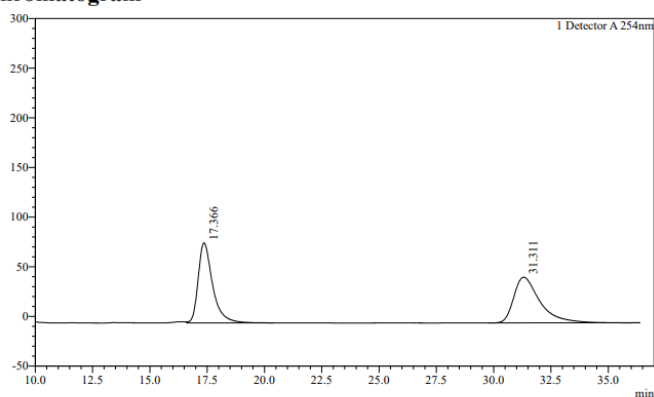

<Peak Table>

| Detector A 254nm |           |         |        |        |         |
|------------------|-----------|---------|--------|--------|---------|
| Peak#            | Ret. Time | Area    | Height | Conc.  | Area%   |
| 1                | 17.366    | 3532465 | 80603  | 49.181 | 49.181  |
| 2                | 31.311    | 3650112 | 46036  | 50.819 | 50.819  |
| Total            |           | 7182577 | 126638 |        | 100.000 |

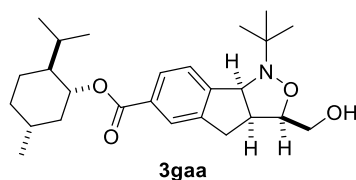

**(1R,2S,5R)-2-isopropyl-5-methylcyclohexyl-1-(tert-butyl)-3-(hydroxymethyl)-3,3a,4,8b-tetrahydro-1H-indeno[1,2-c]isoxazole-6-carboxylate**

Eluent: DCM: Methanol = 20:1, white solid (33.5 mg, 78%); Following the general procedure, the product (33.5 mg) was obtained in 78% yield as an inseparable mixture of 2 diastereomers (1:1, estimated by  $^1\text{H}$  NMR).  $^1\text{H}$  NMR (600 MHz,  $\text{CDCl}_3$ )  $\delta$  7.88 – 7.80 (m, 1H), 7.76 (s, 1H), 7.30 (d,  $J$  = 7.8 Hz, 1H), 4.88 (t,  $J$  = 7.2 Hz, 1H), 4.86 – 4.80 (m, 1H), 4.40 – 4.32 (m, 1H), 3.55 – 3.49 (m, 1H), 3.47 – 3.42 (m, 1H), 3.35 – 3.31 (m, 1H), 3.04 (ddd,  $J$  = 16.8, 7.8, 2.24 Hz, 1H), 2.95 (dt,  $J$  = 16.8, 7.8 Hz, 1H), 2.09 – 2.00 (m, 1H), 1.91 – 1.82 (m, 1H), 1.79 (s, 1H), 1.65 (dd,  $J$  = 11.4, 1.8 Hz, 2H), 1.53 – 1.44 (m, 2H), 1.20 (s, 9H), 1.11 – 0.99 (m, 2H), 0.88 – 0.82 (m, 6H), 0.72 – 0.68 (m, 3H).  $^{13}\text{C}$  NMR (101 MHz,  $\text{CDCl}_3$ )  $\delta$  166.18, 166.15, 148.33, 148.26, 142.57, 142.54, 130.94, 130.87, 128.88, 128.79, 125.33, 125.31, 125.09, 125.06, 81.94, 74.82, 69.89, 62.38, 59.77, 49.37, 49.30, 47.34, 47.39, 41.01, 40.97, 34.36, 31.76, 31.71, 31.46, 27.00, 26.97, 26.60, 26.52, 23.78, 23.70, 22.03, 20.76, 20.71, 16.62, 16.53. HRMS (ESI):  $m/z$  calcd. For  $[\text{C}_{26}\text{H}_{40}\text{NO}_5, \text{M}+\text{H}]^+$  430.2952, found: 430.2938.

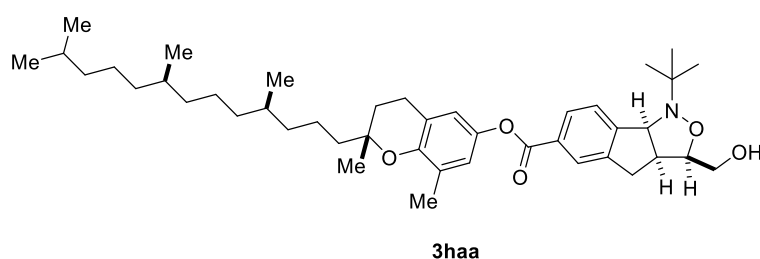

**(R)-2,8-dimethyl-2-((4R,8R)-4,8,12-trimethyltridecyl)chroman-6-yl-1-(tert-butyl)-3-(hydroxymethyl)-3,3a,4,8b-tetrahydro-1H-indeno[1,2-c]isoxazole-6-carboxylate**

Eluent: PE: EA = 3:1, white solid (47.0 mg, 70%); Following the general procedure, the product (47.0 mg) was obtained in 70% yield as an inseparable mixture of 2 diastereomers (1:1, estimated by HPLC with a Daicel Chiralpak AD-H, n-hexane/2-propanol = 90/10,  $v = 0.8 \text{ mL}\cdot\text{min}^{-1}$ ,  $\lambda = 254 \text{ nm}$ ,  $t_1 = 3.7 \text{ min}$ ,  $t_2 = 4.4 \text{ min}$ ; signals of the 2 isomers cannot be distinguished by  $^1\text{H}$  NMR).  $^1\text{H}$  NMR (400 MHz,  $\text{CDCl}_3$ )  $\delta$  8.04 (d,  $J$  = 8.0 Hz, 1H), 7.97 (s, 1H), 7.43 (d,  $J$  = 8.0 Hz, 1H), 6.79 (d,  $J$  = 2.4 Hz, 1H), 6.74 (d,  $J$  = 2.6 Hz, 1H), 4.99 (d,  $J$  = 8.0 Hz, 1H), 4.5 – 4.35 (m, 1H), 3.70 – 3.49 (m, 2H), 3.20 – 2.95 (dd,  $J$  = 11.6, 6.8 Hz, 1H), 3.20 – 2.95 (m, 2H), 2.87 – 2.65 (m, 2H), 2.17 (s, 3H), 1.90 – 1.70 (m, 3H), 1.63 – 1.49 (m, 3H), 1.44 – 1.33 (m, 4H), 1.29 (s, 9H), 1.28 (s, 3H), 1.32 – 1.20 (m, 7H), 1.17 – 1.03 (m, 6H), 0.86 (t,  $J$  = 6.8 Hz, 12H).  $^{13}\text{C}$  NMR (151 MHz,  $\text{CDCl}_3$ )  $\delta$  166.0, 149.9, 142.9, 142.8, 130.0, 129.5, 127.5, 125.9, 125.4, 121.4, 121.1, 119.3, 82.1, 76.2, 70.1, 62.4, 59.9, 49.4, 40.3, 40.2, 39.5, 37.6, 37.4, 32.9, 32.8, 31.9, 31.2, 28.1, 27.1, 24.9, 24.6, 24.4, 24.3, 22.8, 22.7, 22.6, 21.1, 19.8, 19.7, 16.2. HRMS (ESI):  $m/z$  calcd. For  $[\text{C}_{43}\text{H}_{66}\text{NO}_5, \text{M}+\text{H}]^+$  676.4936, found: 676.4935.

<Chromatogram>

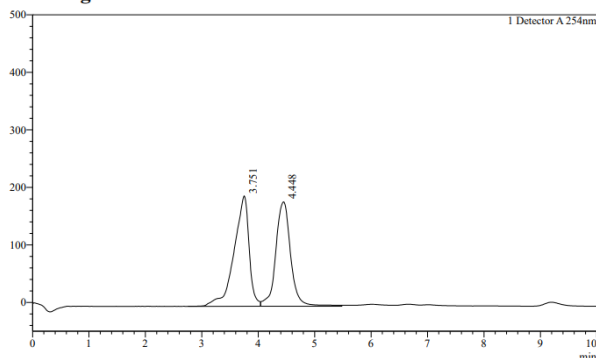

<Peak Table>

| Peak# | Ret. Time | Area    | Height | Conc.  | Area%   |
|-------|-----------|---------|--------|--------|---------|
| 1     | 3.751     | 3565131 | 191750 | 51.645 | 51.645  |
| 2     | 4.448     | 3338006 | 181596 | 48.355 | 48.355  |
| Total |           | 6903136 | 373346 |        | 100.000 |

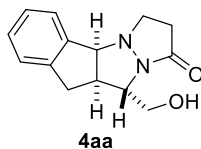

**10-(hydroxymethyl)-2,3,4a,9,9a,10-hexahydro-1H-indeno[1,2-c]pyrazolo[1,2-a]pyrazol-1-one**

Eluent: DCM: Methanol = 20:1, white solid (18.5 mg, 76%, m.p. 124 - 126 °C); <sup>1</sup>H NMR (400 MHz, CDCl<sub>3</sub>) δ 7.26 – 7.15 (m, 4H), 5.31 (s, 1H), 4.12 (d, *J* = 8.4 Hz, 1H), 3.92 (d, *J* = 12.4 Hz, 1H), 3.83 (dd, *J* = 12.4, 8.8 Hz, 1H), 3.74 – 3.69 (m, 1H), 3.55 – 3.48 (m, 1H), 3.15 (dd, *J* = 16.0, 8.8 Hz, 1H), 3.10 – 3.01 (m, 2H), 2.91 (dd, *J* = 16.4, 4.0 Hz, 1H), 2.88 – 2.78 (m, 1H), 2.69 (ddd, *J* = 16.0, 8.4, 2.0 Hz, 1H). <sup>13</sup>C NMR (151 MHz, CDCl<sub>3</sub>) δ 165.1, 142.3, 139.9, 129.1, 127.4, 125.6, 124.8, 74.9, 64.4, 62.6, 52.7, 48.1, 36.3, 36.2. HRMS (ESI): *m/z* calcd. For [C<sub>14</sub>H<sub>16</sub>N<sub>2</sub>O<sub>2</sub>, M+H]<sup>+</sup> 267.1104, found: 267.1100.

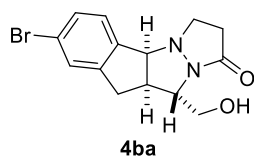

**7-bromo-10-(hydroxymethyl)-2,3,4a,9,9a,10-hexahydro-1H-indeno[1,2-c]pyrazolo[1,2-a]pyrazol-1-one**

Eluent: DCM: Methanol = 20:1, brown solid (22.6 mg, 70%, m.p. 178 - 180 °C); <sup>1</sup>H NMR (400 MHz, CDCl<sub>3</sub>) δ 7.32 (d, *J* = 8.4 Hz, 2H), 7.08 (d, *J* = 8.0 Hz, 1H), 5.22 (s, 1H), 4.05 (d, *J* = 8.0 Hz, 1H), 3.98 – 3.88 (m, 1H), 3.86 – 3.78 (m, 1H), 3.70 (t, *J* = 8.8 Hz, 1H), 3.49 (t, *J* = 7.2 Hz, 1H), 3.18 – 3.01 (m, 3H), 2.93 – 2.78 (m, 2H), 2.69 (dd, *J* = 16.0, 8.4 Hz, 1H). <sup>13</sup>C NMR (151 MHz, CDCl<sub>3</sub>) δ 165.2, 144.6,

139.2, 130.6, 128.7, 126.3, 123.1, 74.2, 64.2, 62.4, 52.7, 48.2, 36.3, 35.9. HRMS (ESI):  $m/z$  calcd. For  $[C_{15}H_{15}BrN_2NaO_2, M+Na]^+$  345.0209, found: 345.0204.

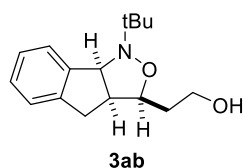

### 2-(1-(tert-butyl)-3,4,8b-tetrahydro-1H-indeno[1,2-c]isoxazol-3-yl)ethan-1-ol

Eluent: PE: EA = 2:1, yellow oil (8.0 mg, 31%);  $^1H$  NMR (400 MHz,  $CDCl_3$ )  $\delta$  7.23 (dt,  $J = 8.0, 4.0$  Hz, 1H), 7.15 – 7.07 (m, 3H), 4.80 (d,  $J = 8.0$  Hz, 1H), 4.39 (ddd,  $J = 10.0, 7.2, 3.2$  Hz, 1H), 3.66 (ddd,  $J = 16.4, 9.2, 4.8$  Hz, 2H), 3.40 (ddd,  $J = 15.6, 7.6, 4.0$  Hz, 1H), 3.03 (dd,  $J = 16.2, 4.4$  Hz, 1H), 2.88 (dd,  $J = 16.4, 8.4$  Hz, 1H), 1.69 – 1.62 (m, 1H), 1.56 – 1.46 (m, 1H), 1.19 (s, 9H).  $^{13}C$  NMR (151 MHz,  $CDCl_3$ )  $\delta$  143.4, 142.5, 127.9, 127.0, 125.3, 124.2, 80.9, 69.4, 61.6, 59.6, 51.7, 33.4, 32.0, 27.0. HRMS (ESI):  $m/z$  calcd. For  $[C_{16}H_{23}NNaO_2, M+Na]^+$  284.1621, found: 284.1611.

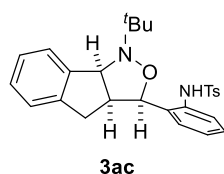

### N-(2-(1-(tert-butyl)-3,4,8b-tetrahydro-1H-indeno[1,2-c]isoxazol-3-yl)phenyl)-4-methylbenzenesulfonamide

Eluent: PE: EA = 6:1, yellow oil (28.2 mg, 61%);  $^1H$  NMR (400 MHz,  $CDCl_3$ )  $\delta$  8.19 (s, 1H), 7.56 (d,  $J = 7.6$  Hz, 1H), 7.50 (d,  $J = 8.8$  Hz, 2H), 7.32 – 7.28 (m, 1H), 7.26 – 7.20 (m, 3H), 7.10 – 7.06 (m, 1H), 7.04 – 6.99 (m, 2H), 6.96 (d,  $J = 8.0$  Hz, 2H), 4.75 (d,  $J = 8.4$  Hz, 1H), 3.94 (d,  $J = 10.0$  Hz, 1H), 3.04 (dd,  $J = 17.2, 8.0$  Hz, 1H), 2.89 (dd,  $J = 16.8, 7.6$  Hz, 1H), 2.43 – 2.37 (m, 1H), 2.24 (s, 3H), 1.27 (s, 9H).  $^{13}C$  NMR (101 MHz,  $CDCl_3$ )  $\delta$  143.4, 140.4, 137.1, 137.0, 129.4, 129.3, 128.0, 127.7, 127.6, 127.3, 126.9, 126.4, 125.9, 125.3, 124.3, 121.7, 81.7, 69.0, 58.6, 49.2, 32.3, 26.4, 21.5. HRMS (ESI):  $m/z$  calcd. For  $[C_{27}H_{31}N_2O_2S, M+H]^+$  463.2050, found: 463.2050.

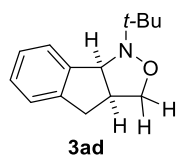

### 1-(tert-butyl)-3,4,8b-tetrahydro-1H-indeno[1,2-c]isoxazole

Eluent: PE: EA = 4:1, yellow oil (15.0 mg, 69%);  $^1H$  NMR (400 MHz,  $CDCl_3$ )  $\delta$  7.32 – 7.23 (m, 1H), 7.19 – 7.07 (m, 3H), 4.71 (d,  $J = 8.0$  Hz, 1H), 4.20 (t,  $J = 7.6$  Hz, 1H), 3.32 (t,  $J = 8.0$  Hz, 1H), 3.28 –

---

3.17 (m, 1H), 3.05 (dd,  $J = 16.4, 7.2$  Hz, 1H), 2.76 (d,  $J = 16.4$  Hz, 1H), 1.18 (s, 9H).  $^{13}\text{C}$  NMR (101 MHz,  $\text{CDCl}_3$ )  $\delta$  143.8, 140.9, 127.9, 127.4, 125.8, 125.0, 73.7, 68.9, 58.9, 47.2, 34.6, 26.7. HRMS (ESI):  $m/z$  calcd. For  $[\text{C}_{14}\text{H}_{20}\text{NO}, \text{M}+\text{H}]^+$  281.1539, found: 281.1539

## 8. NMR Spectrum and Mass Spectrogr

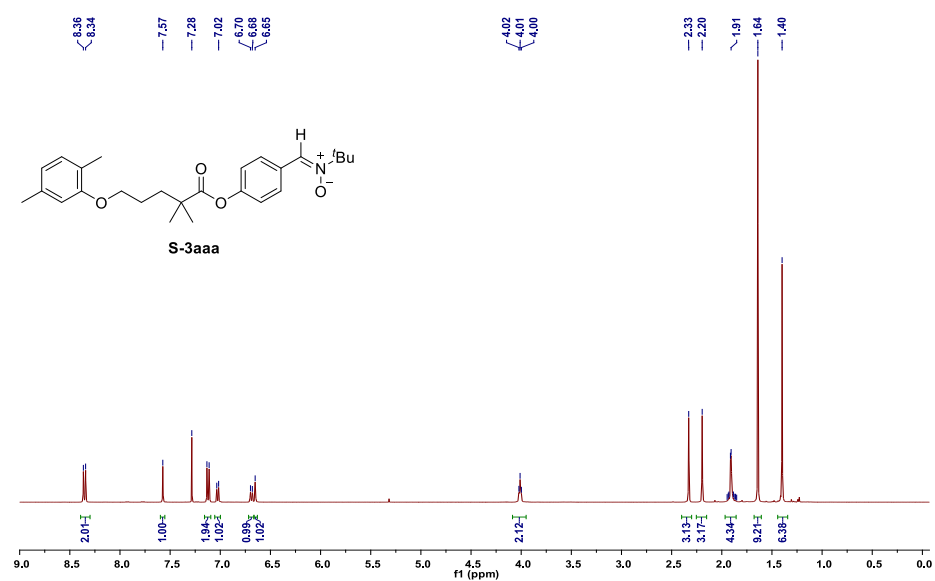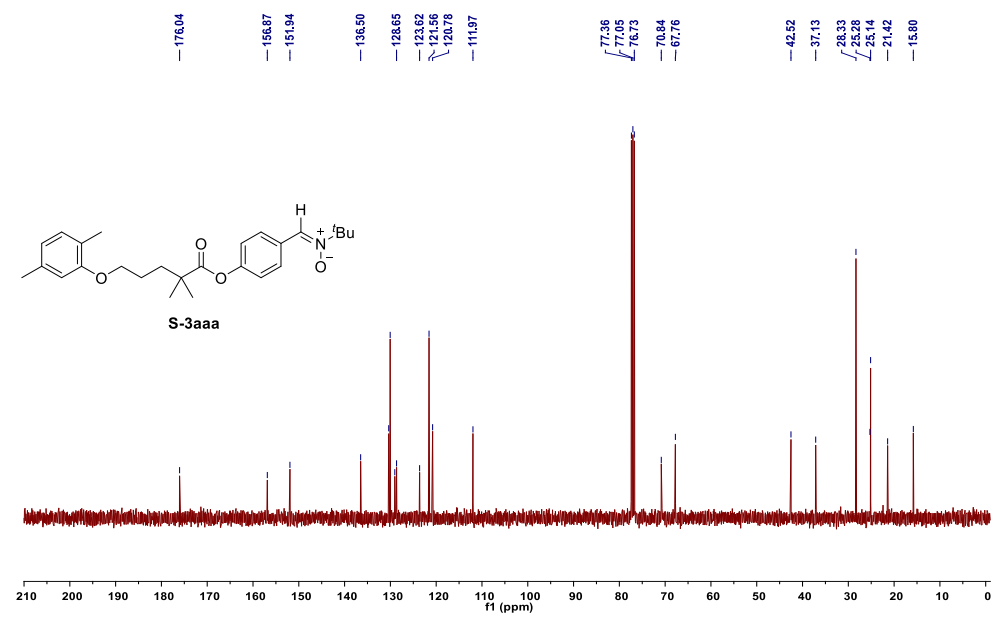



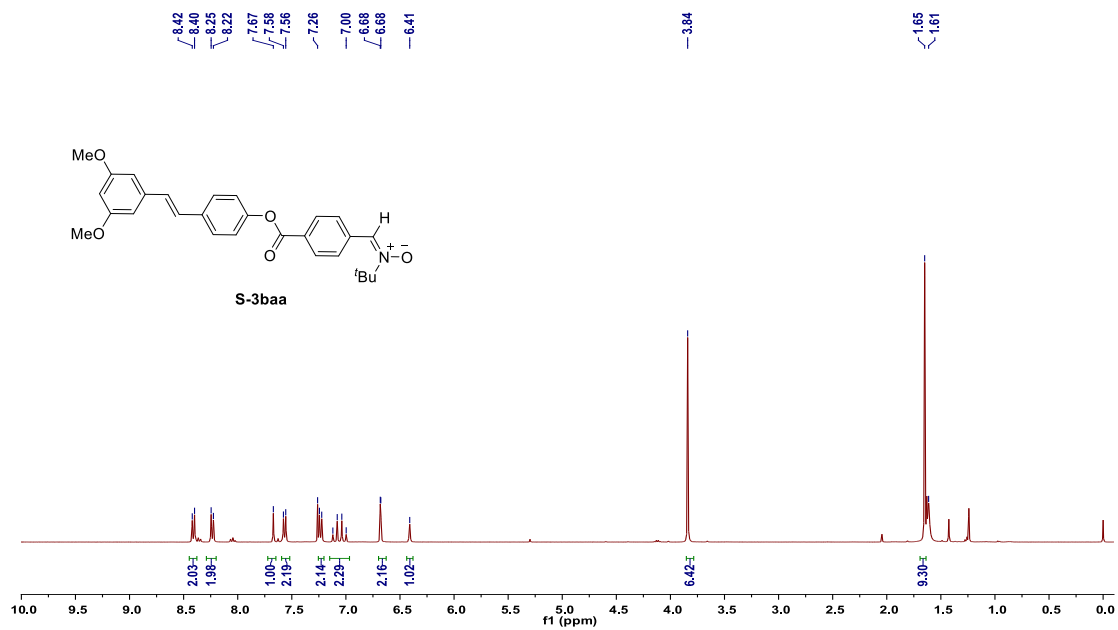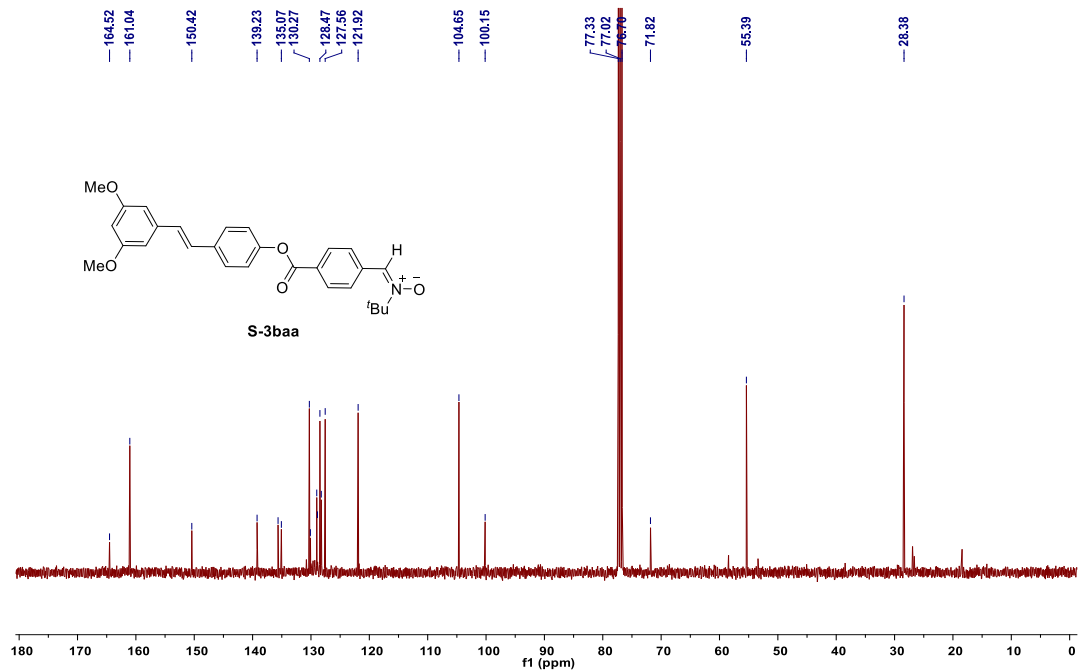

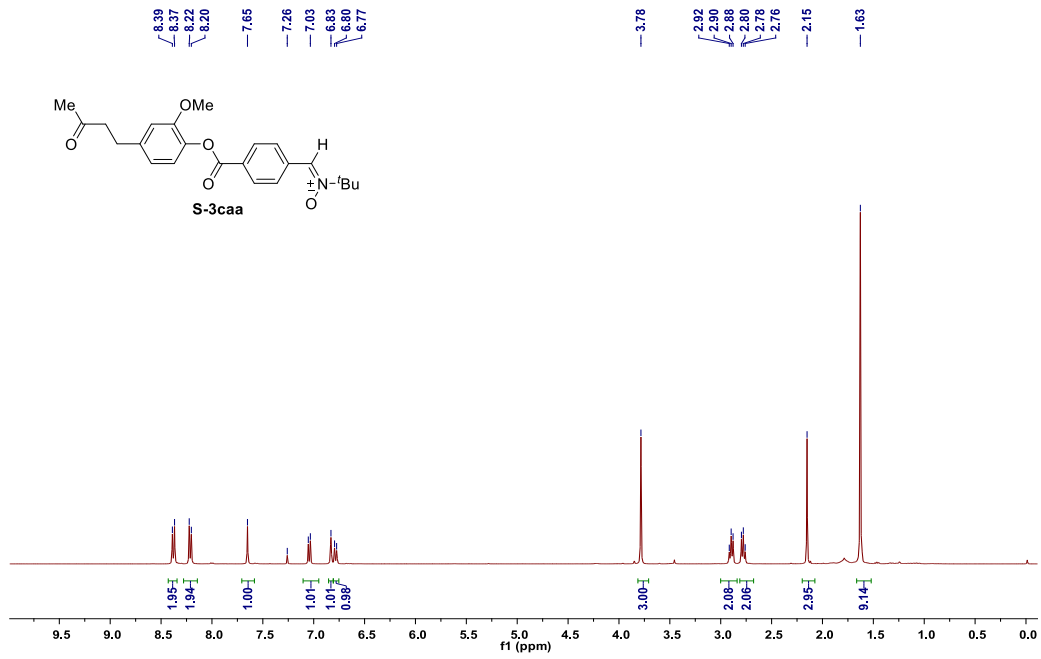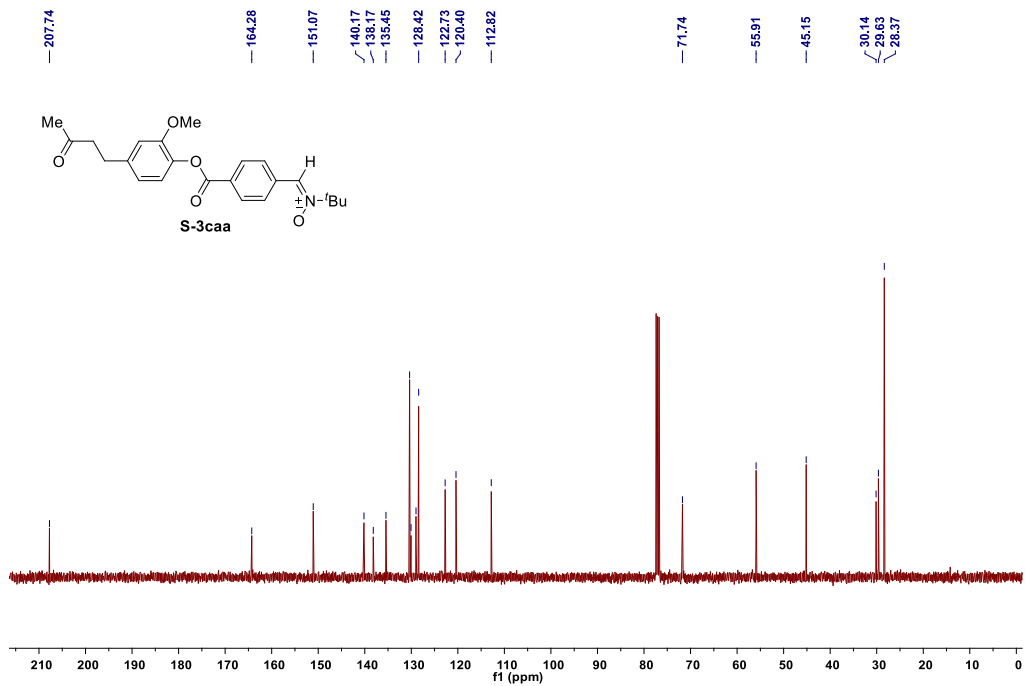

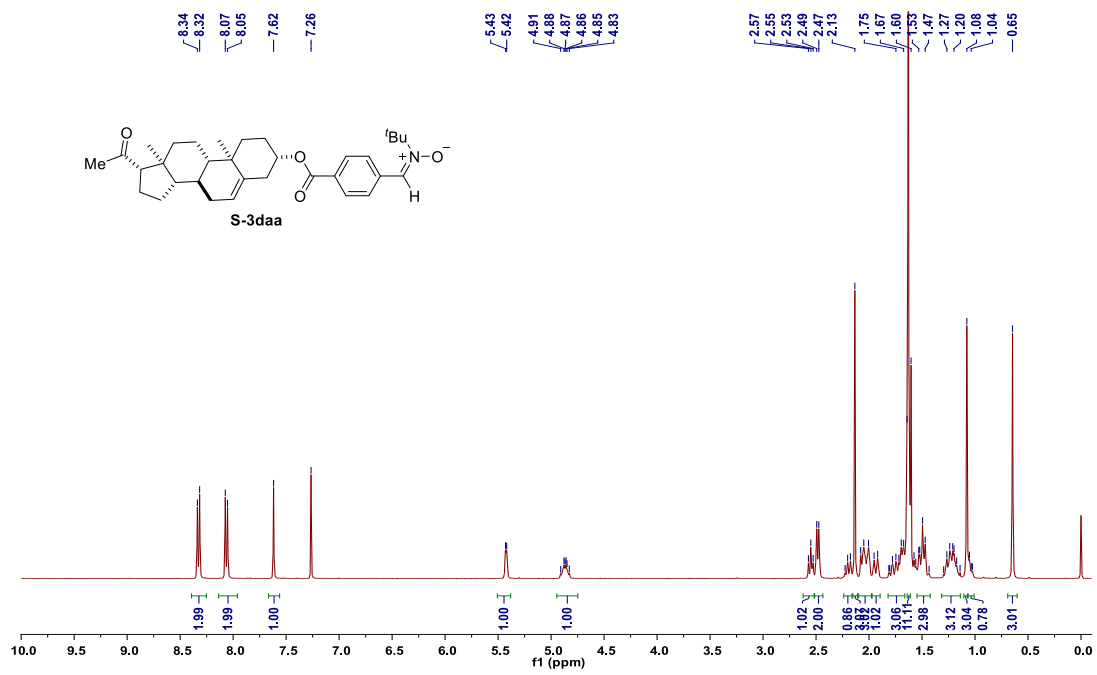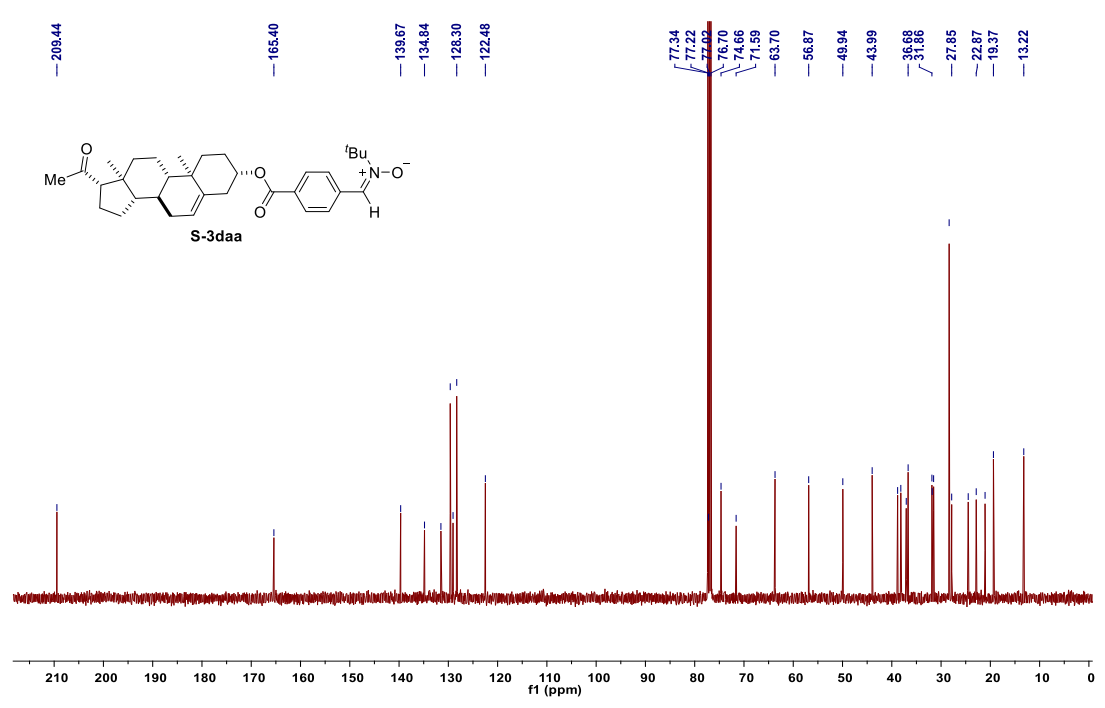

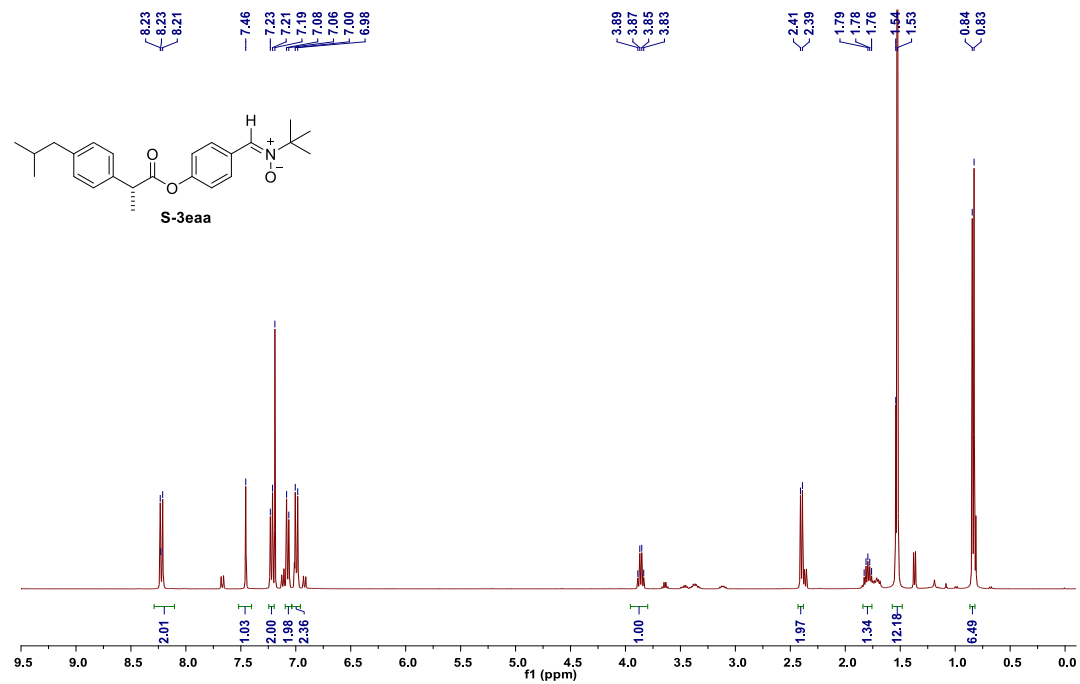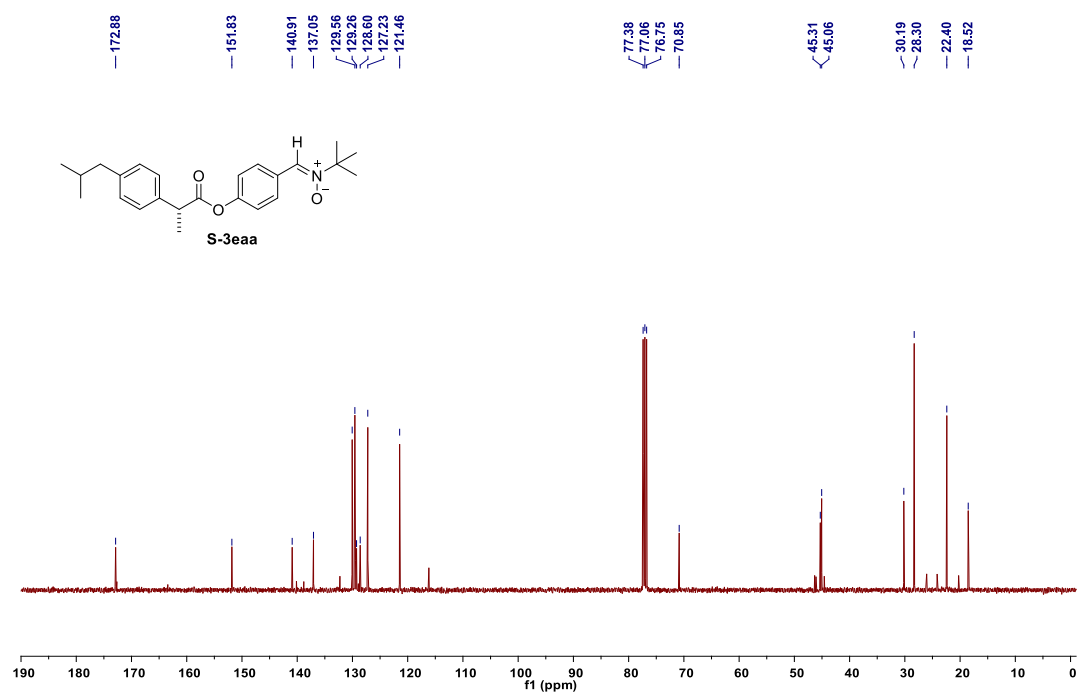

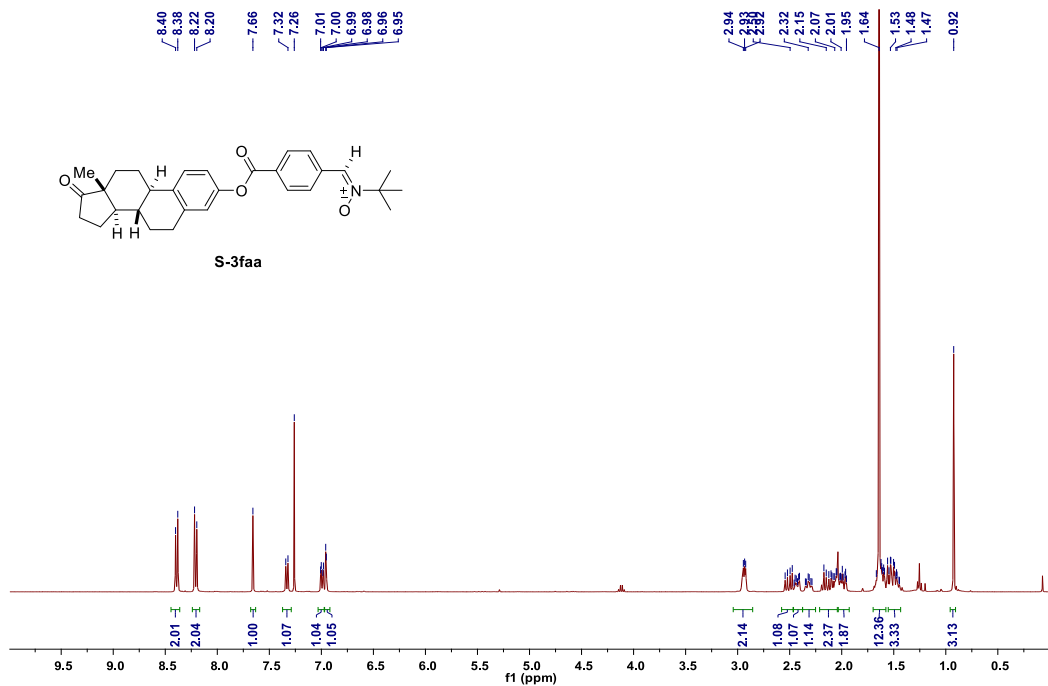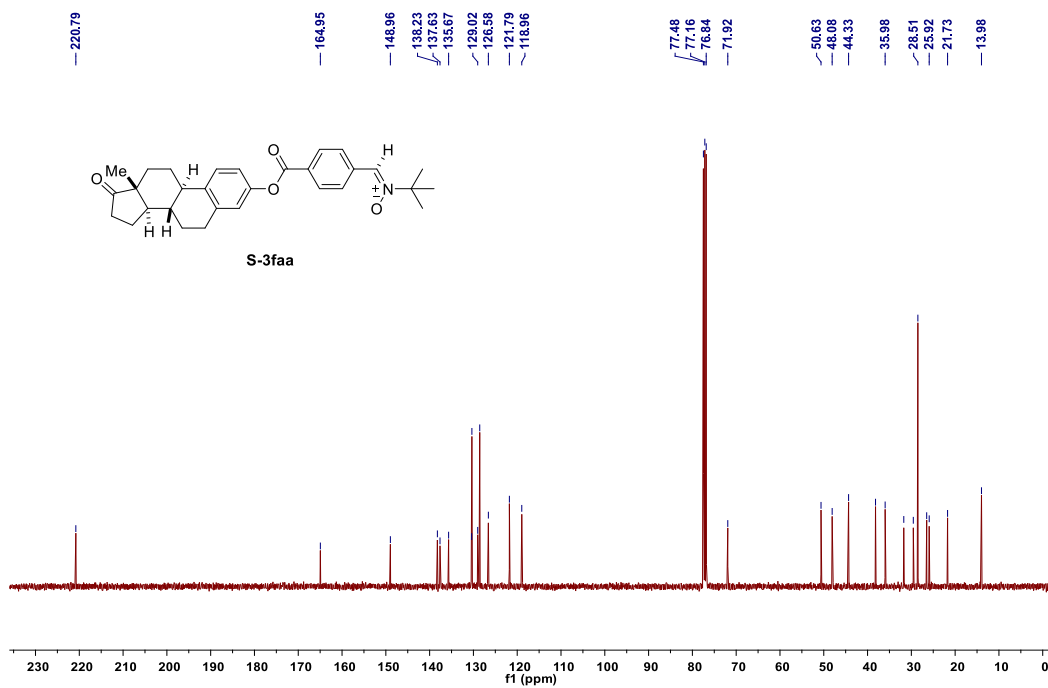

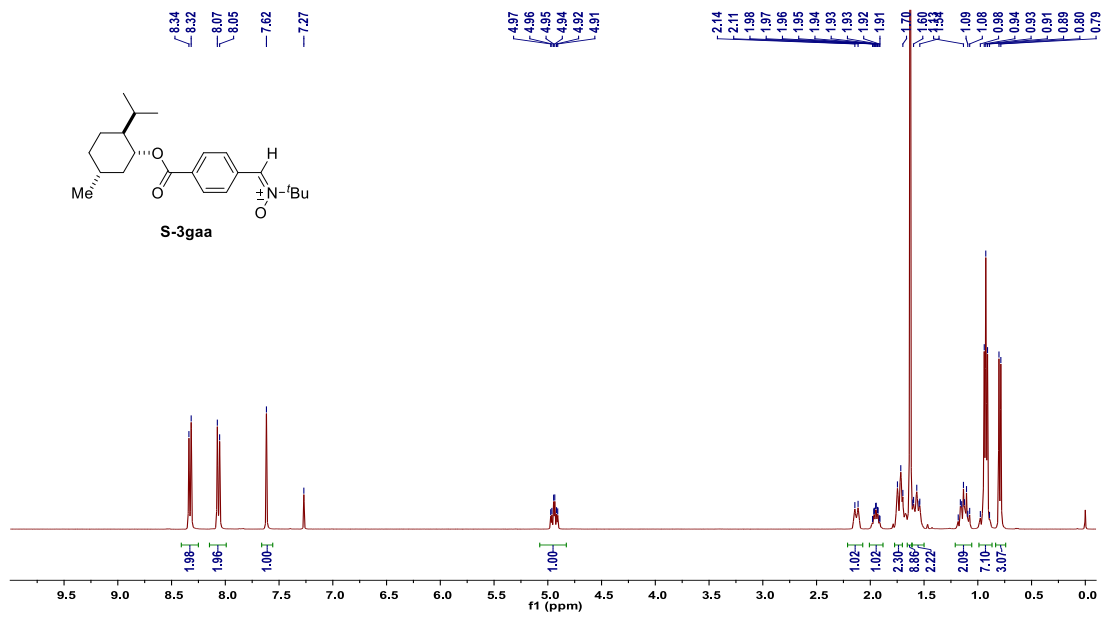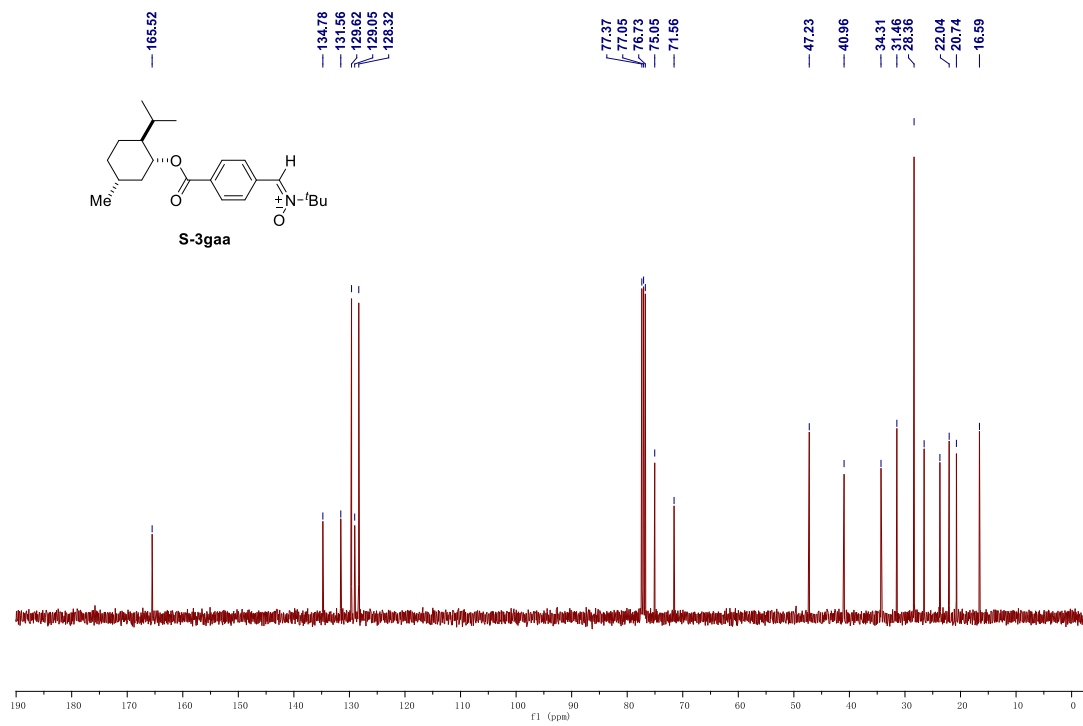

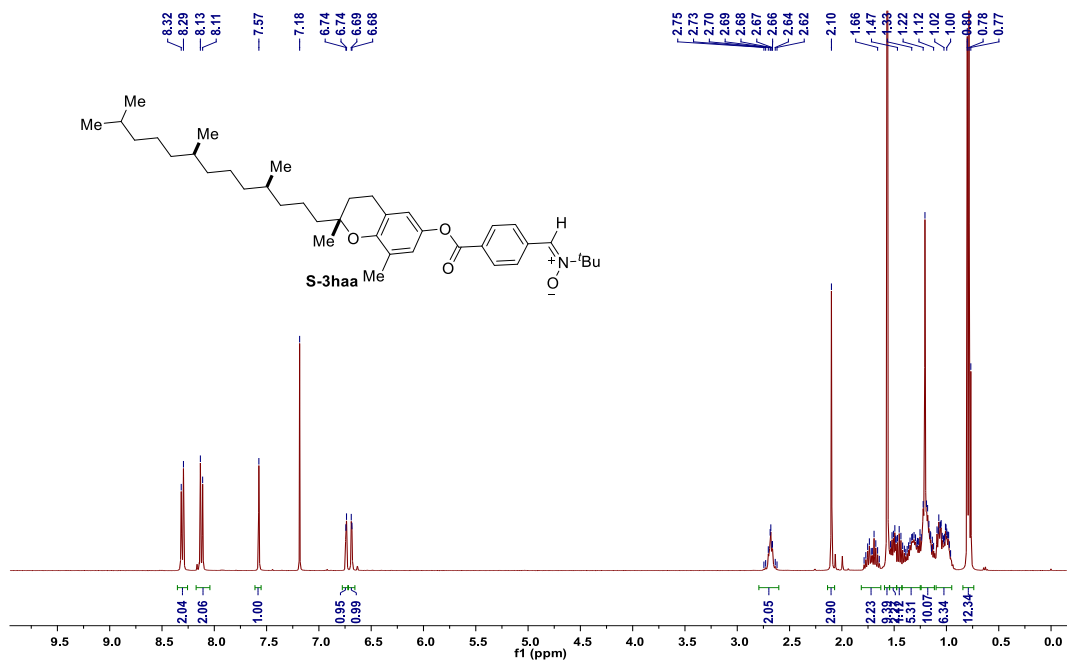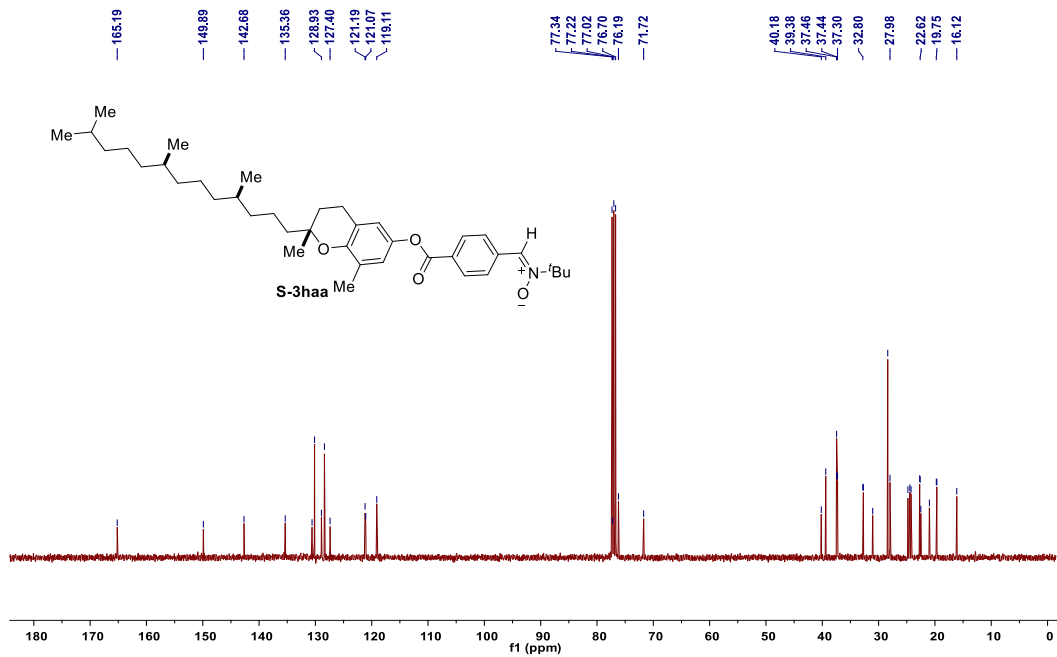

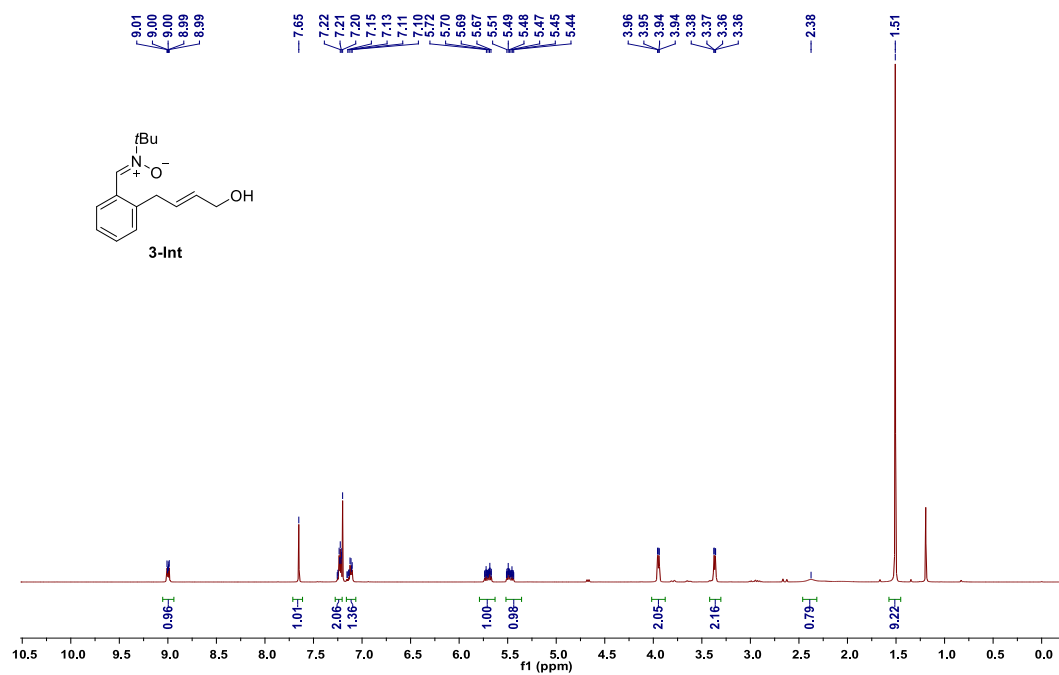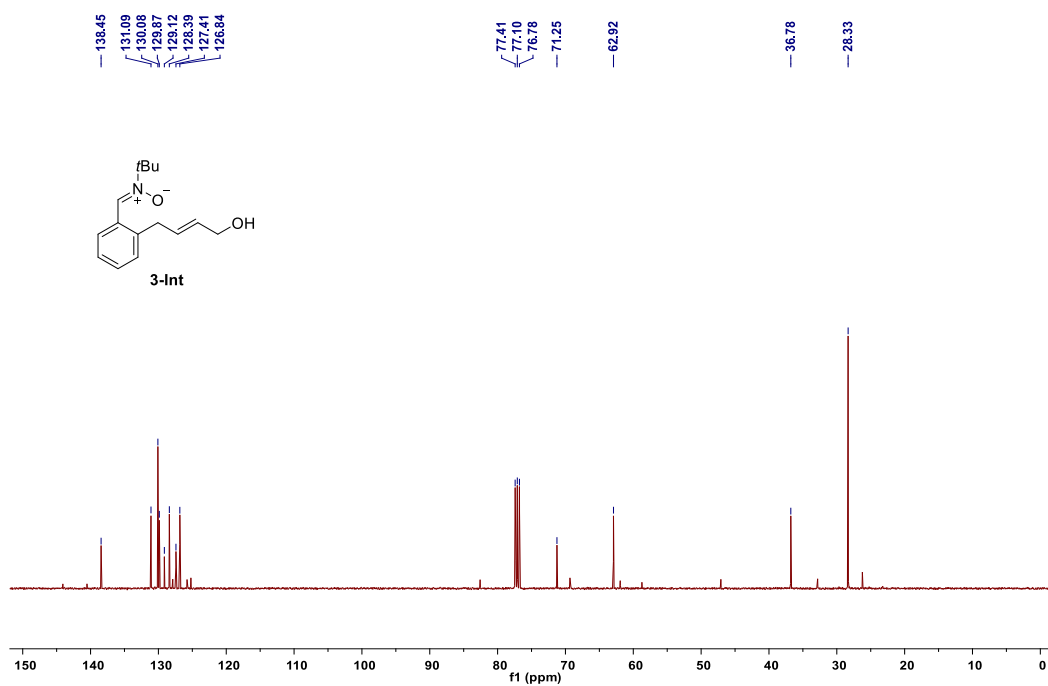



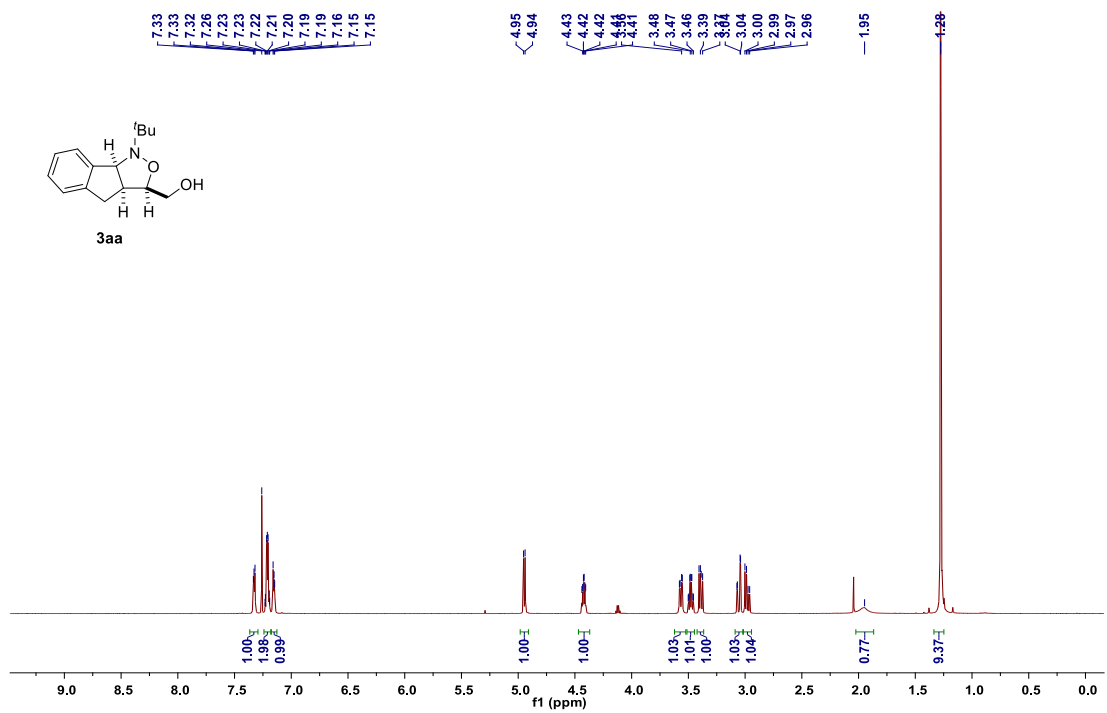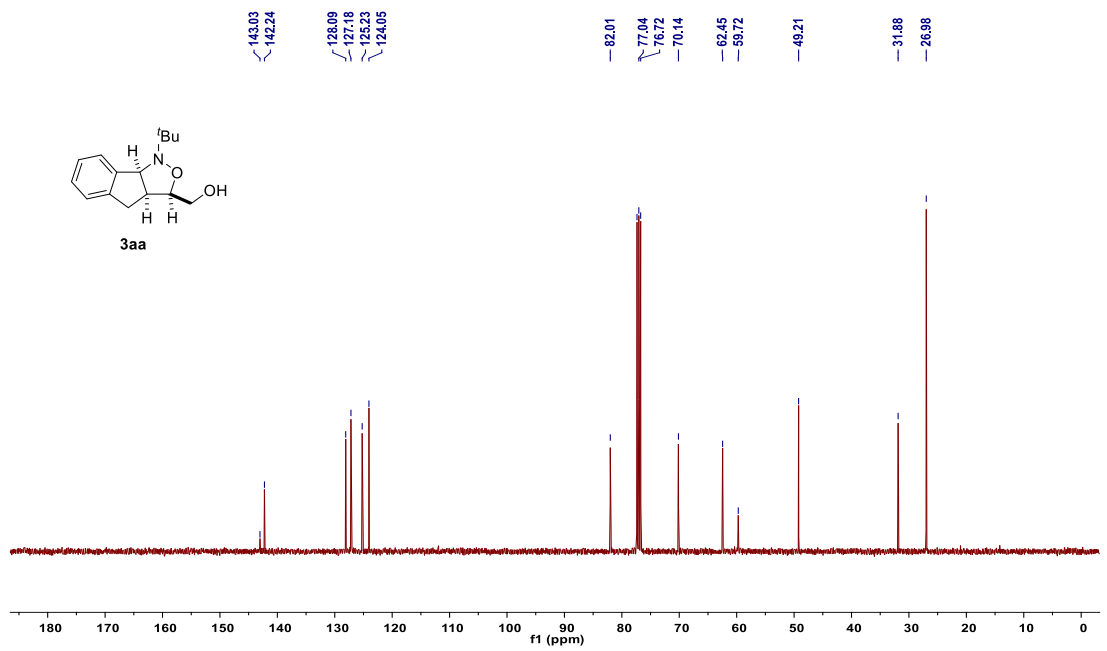

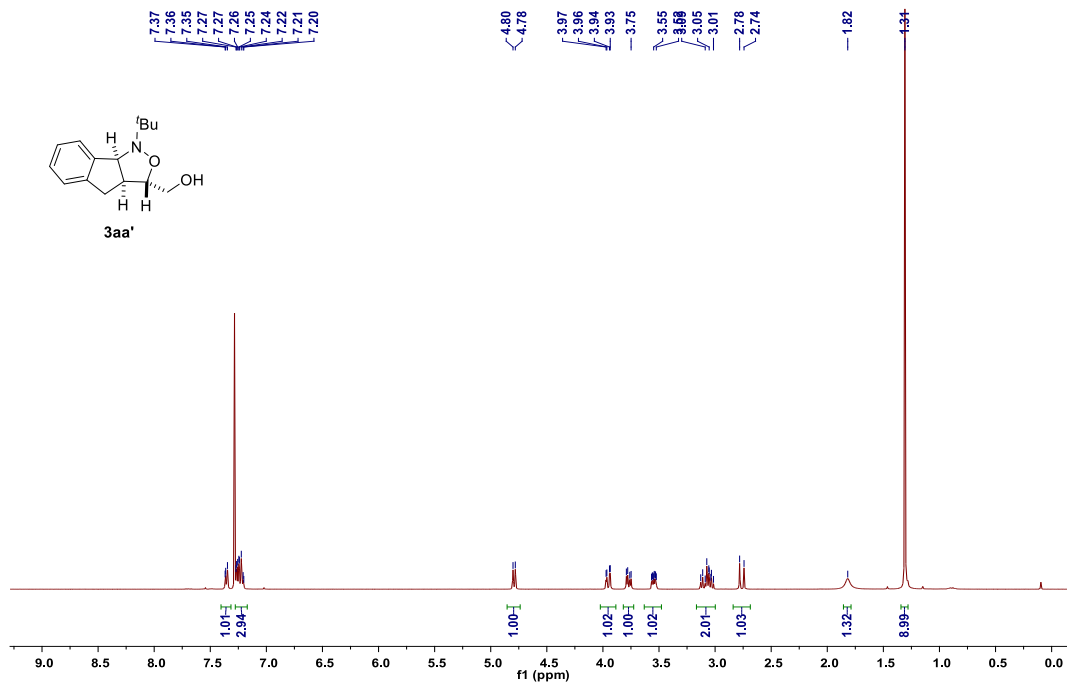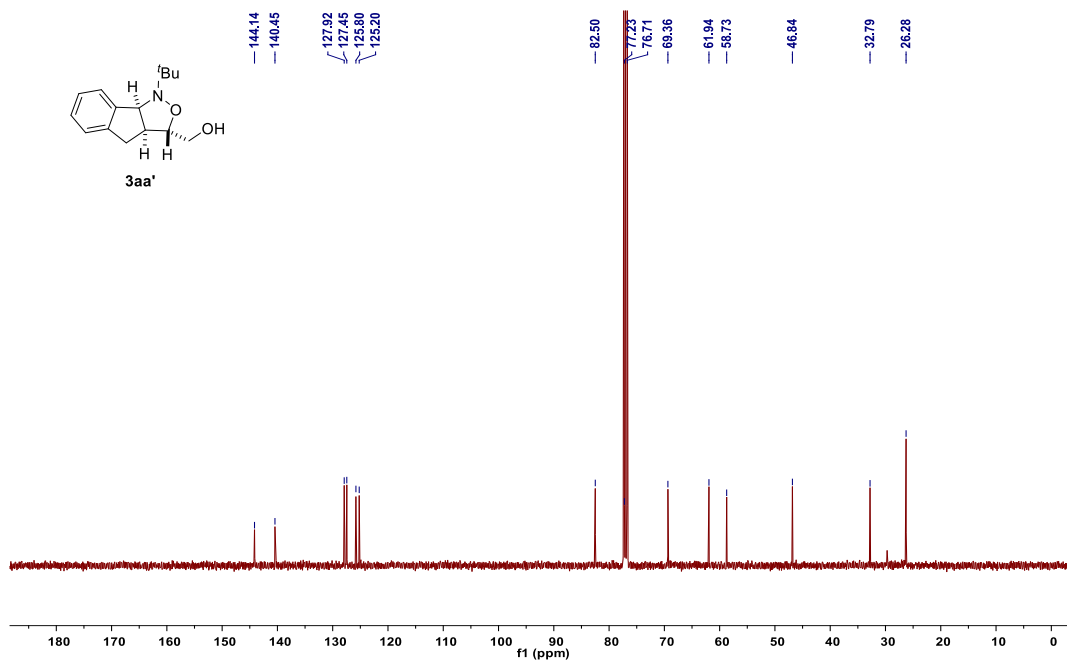

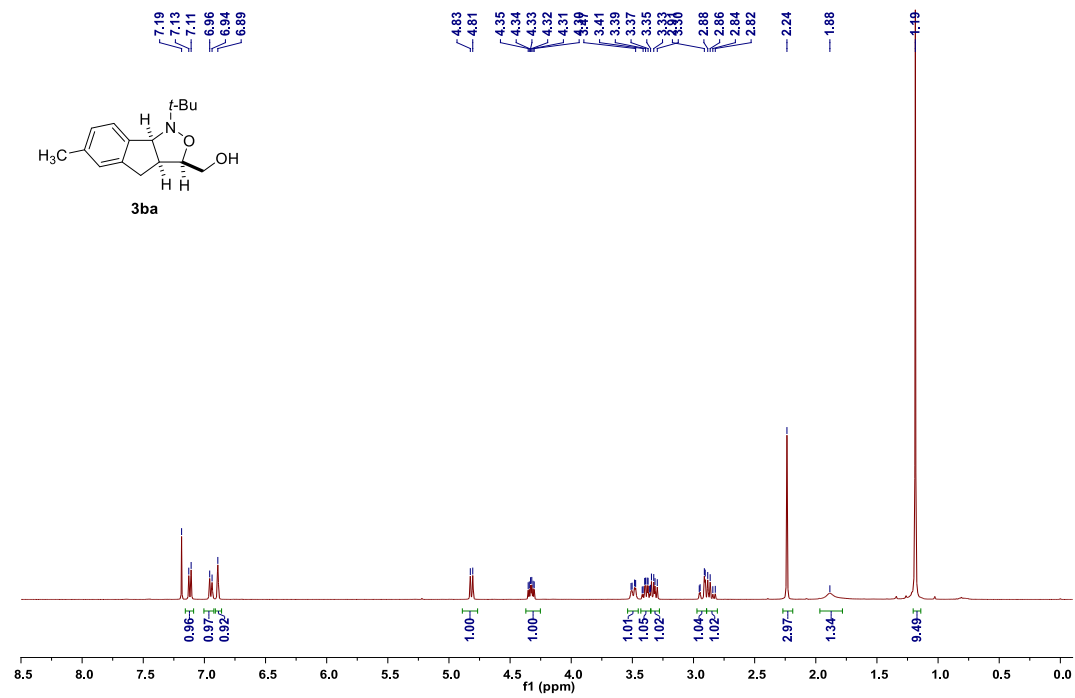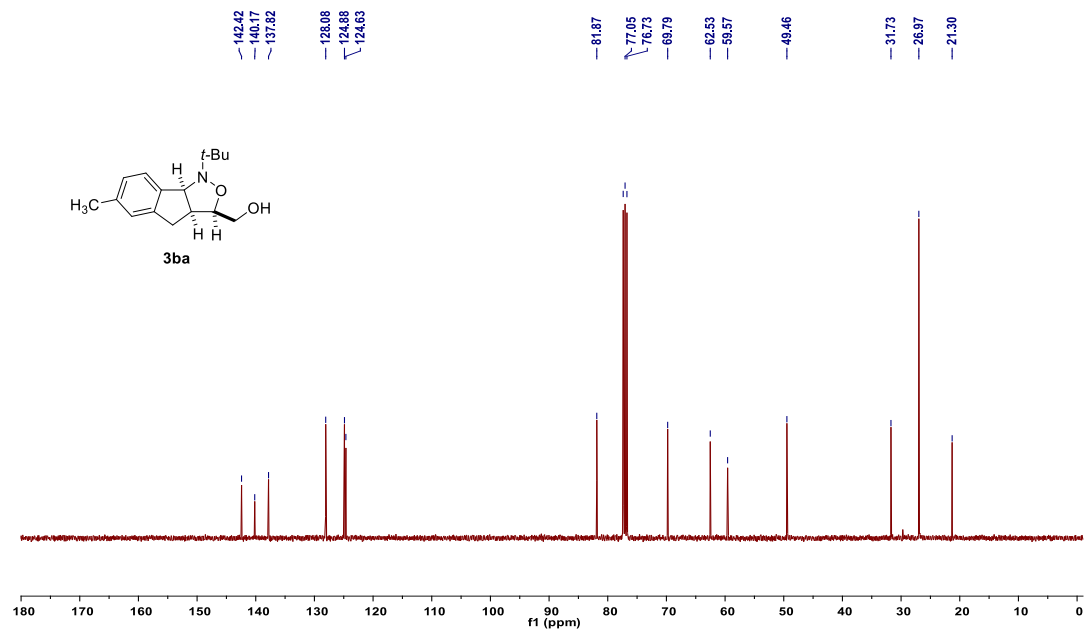

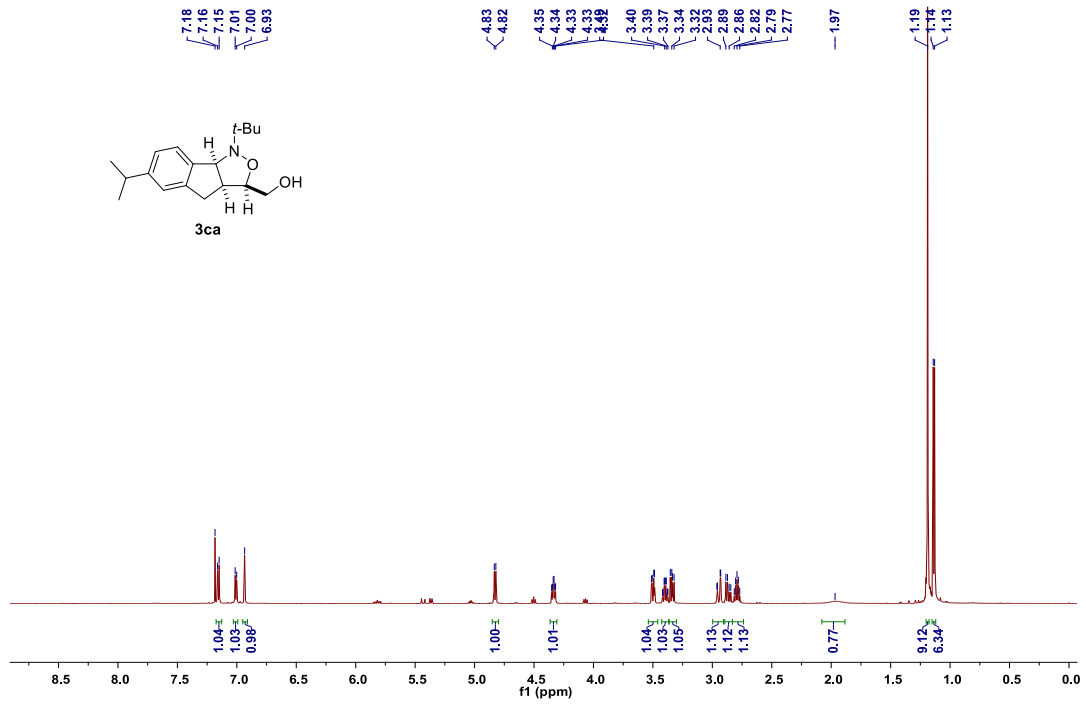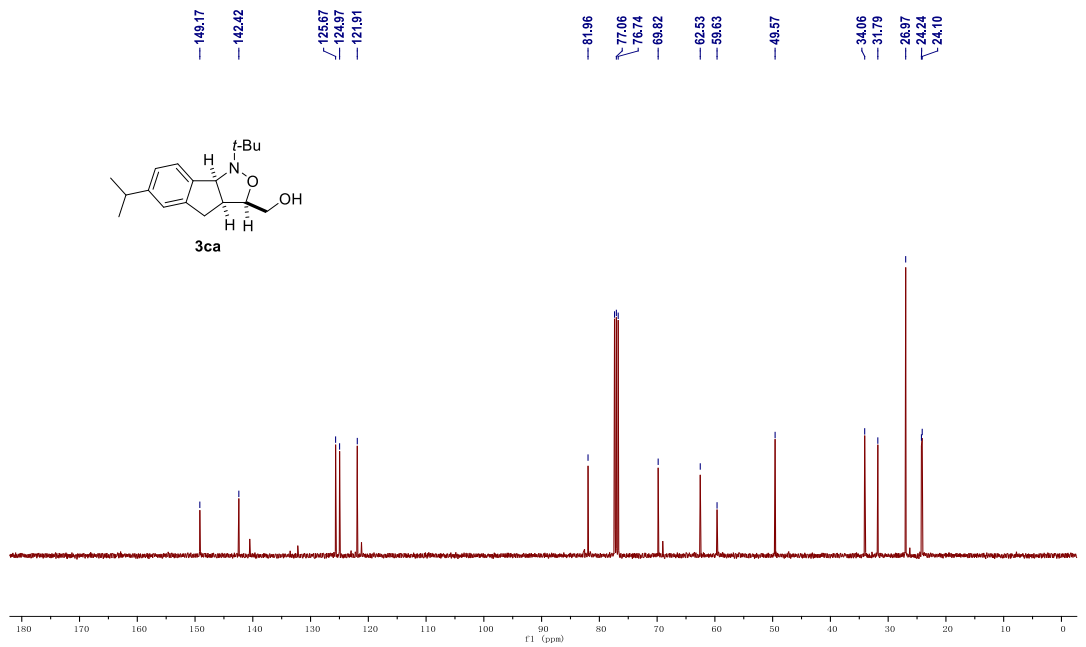

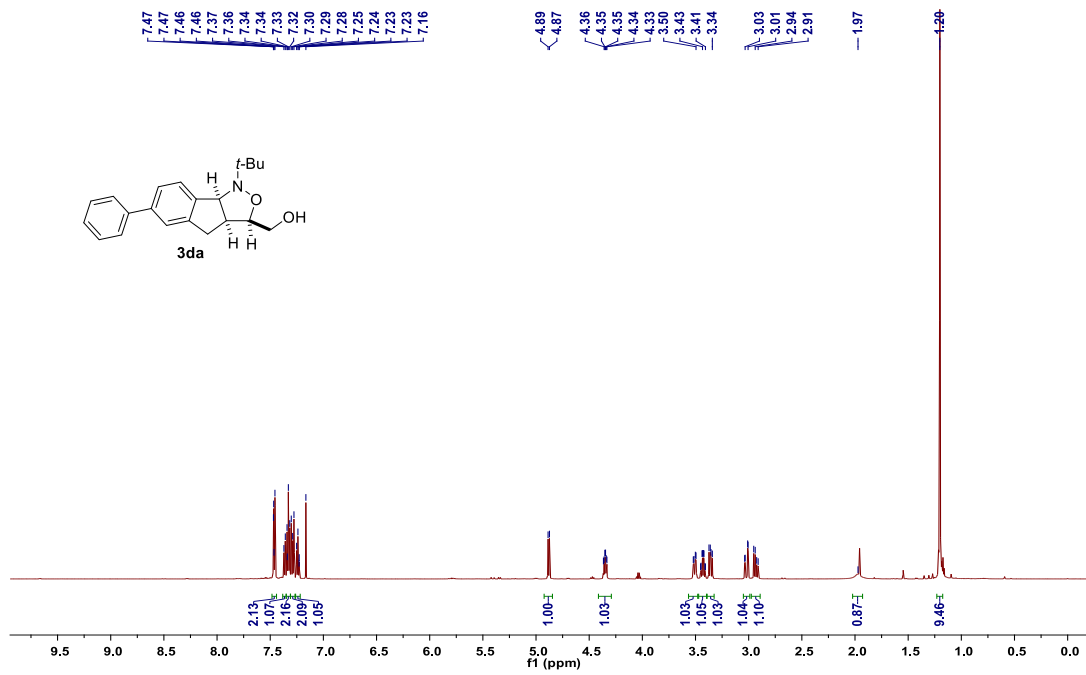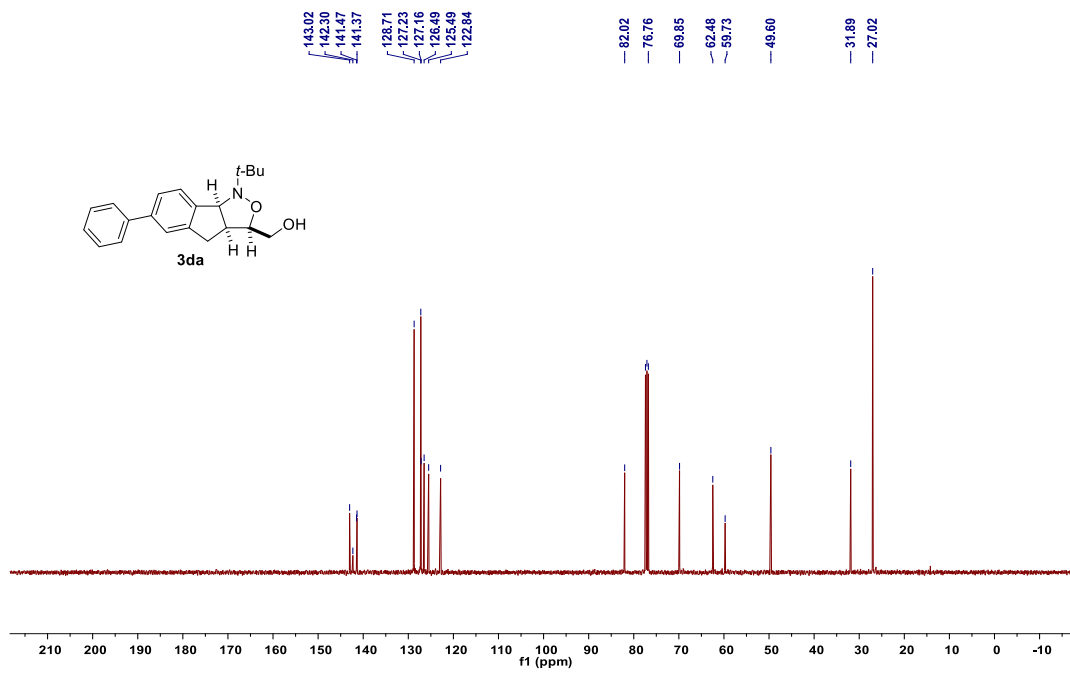

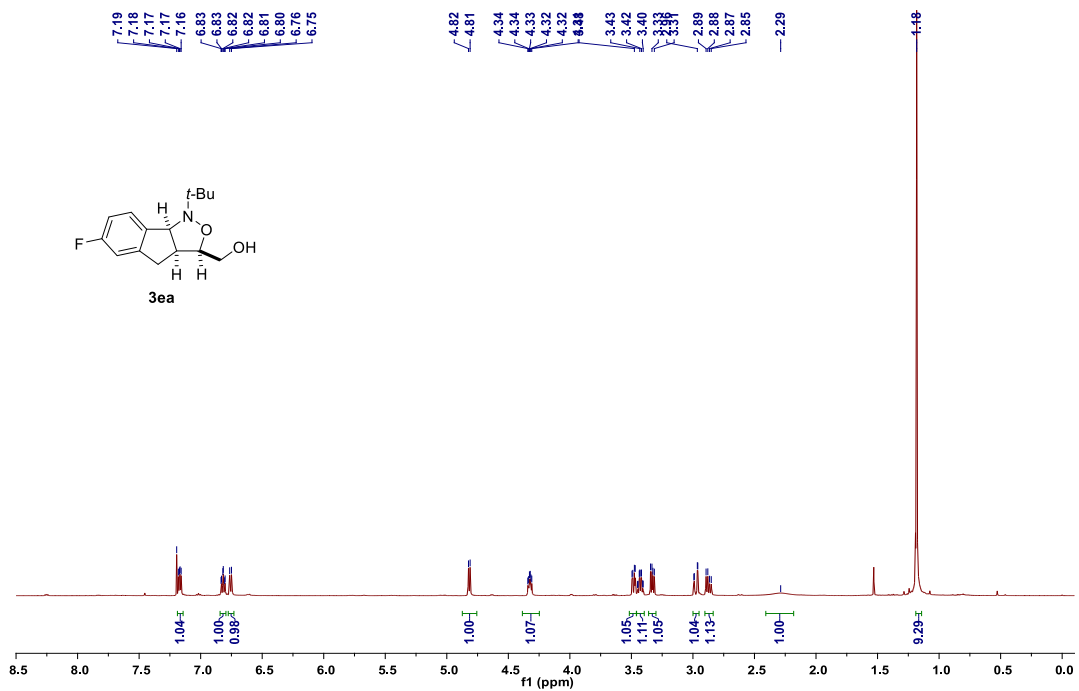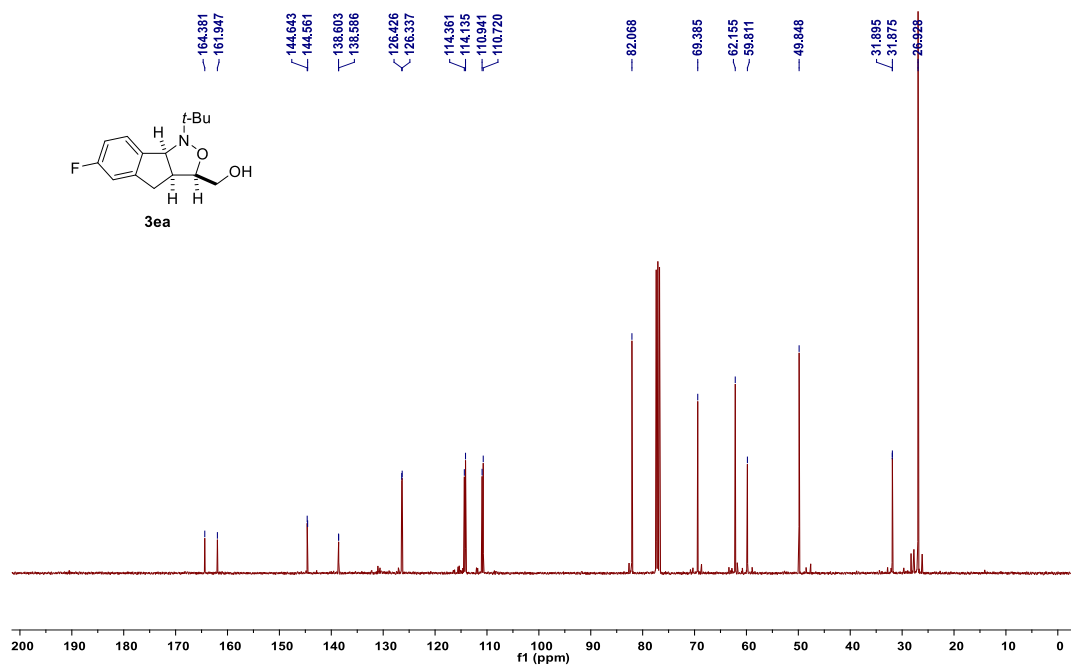

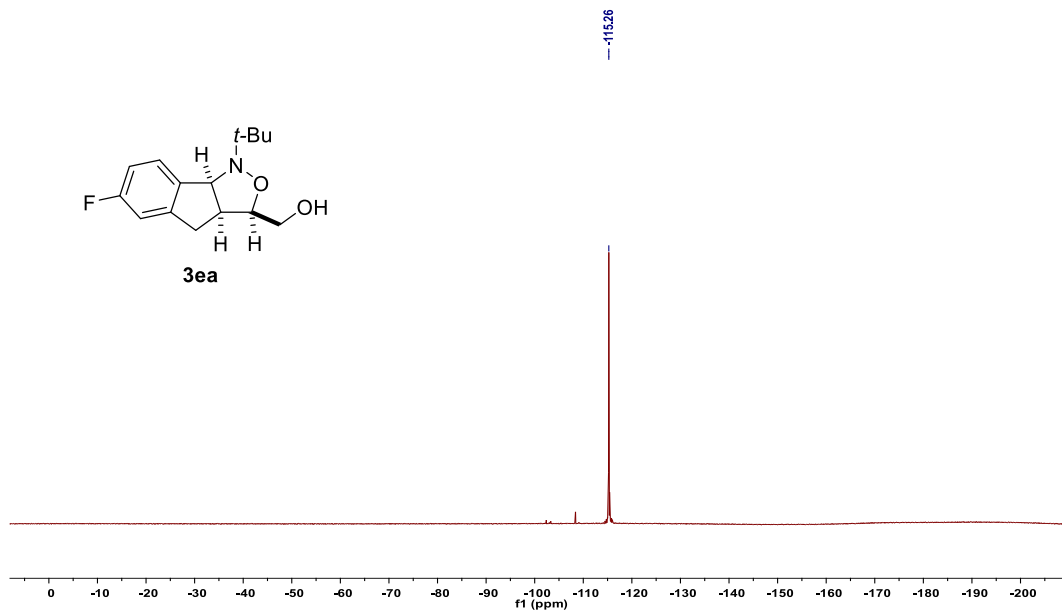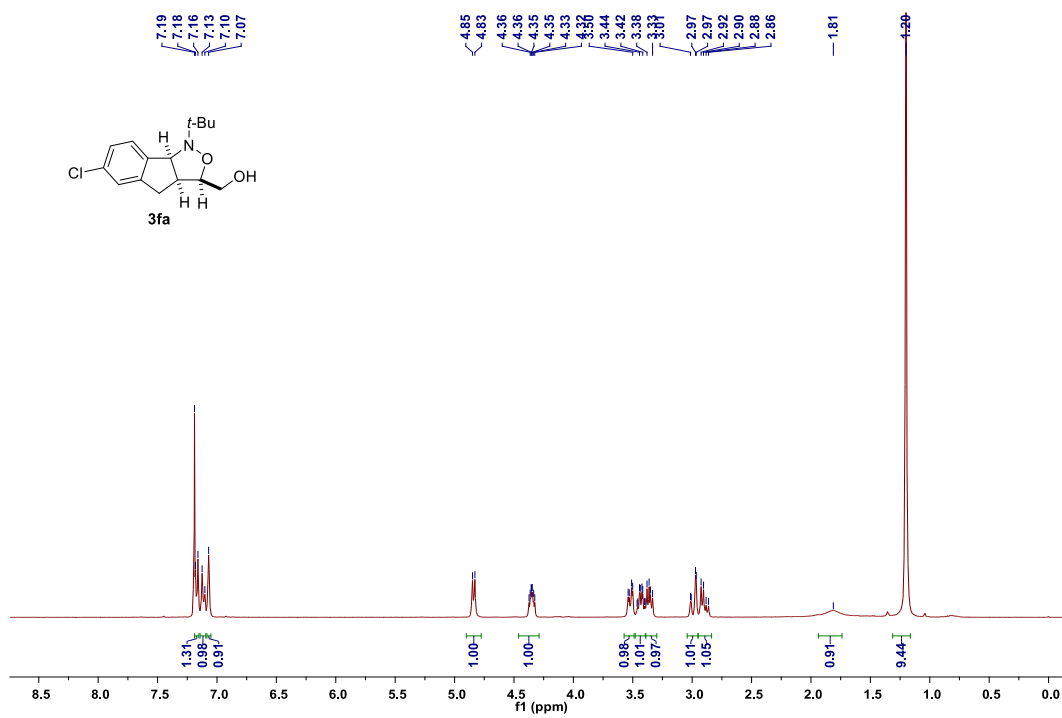

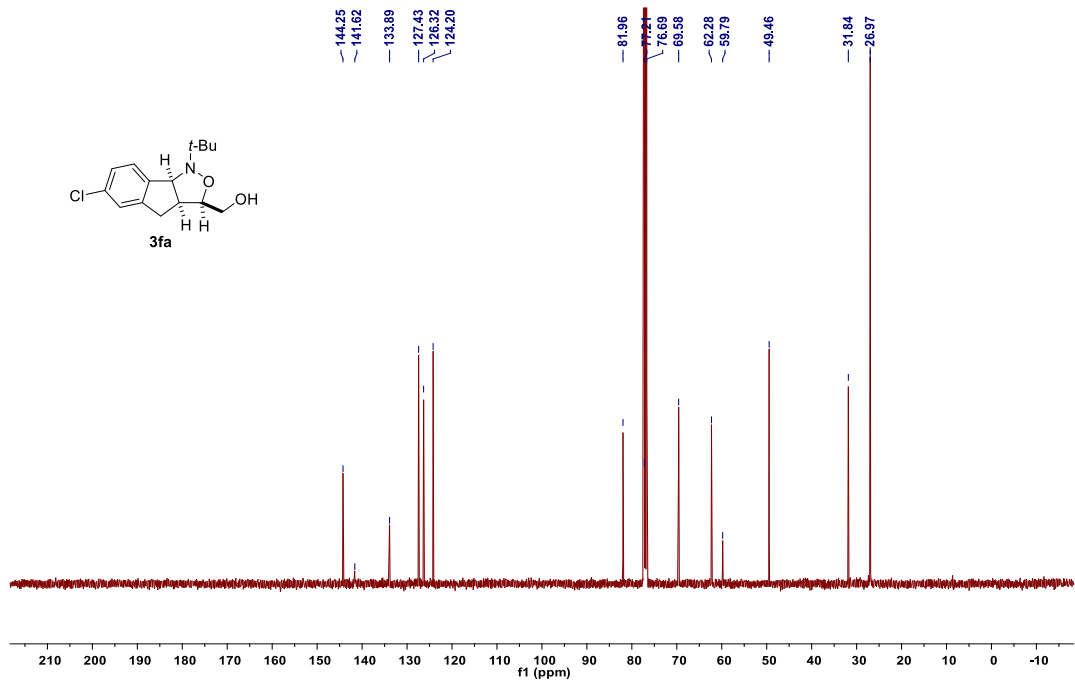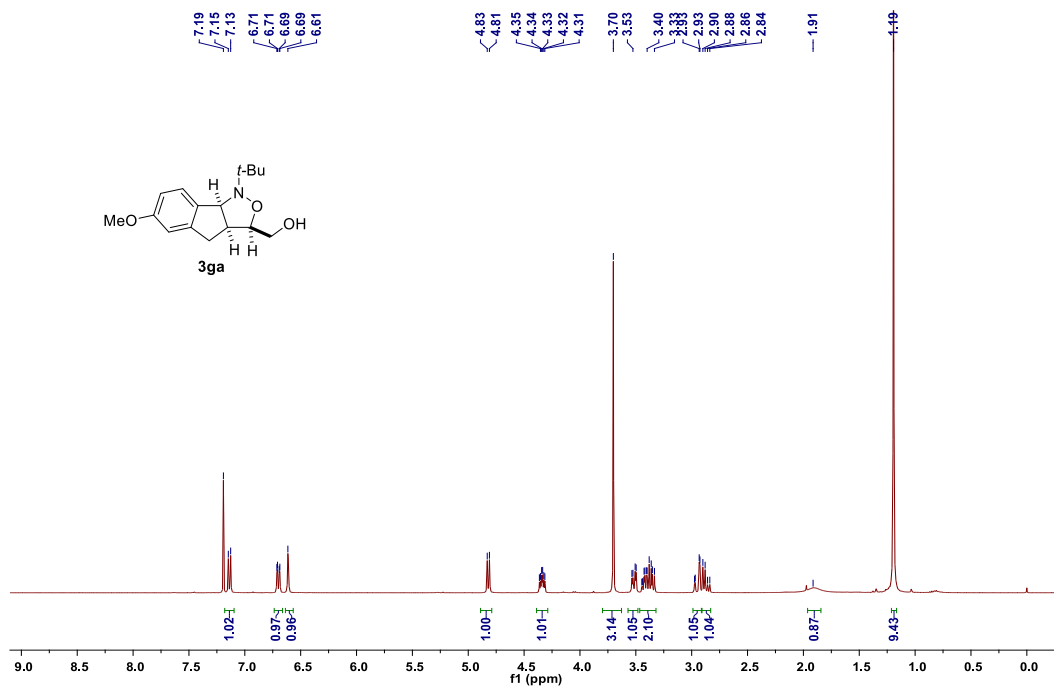



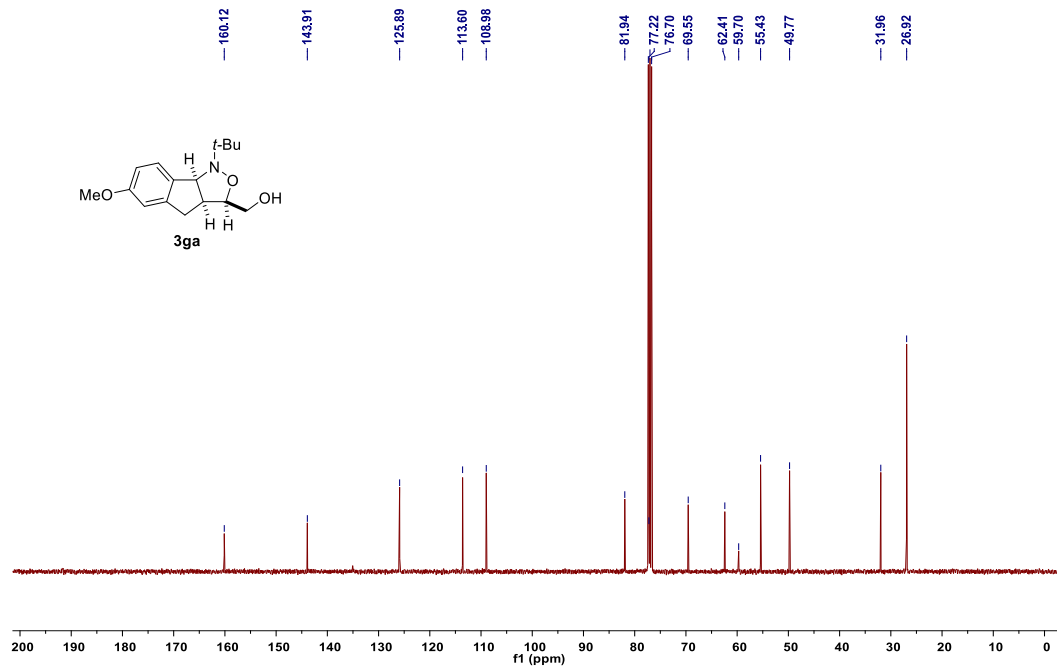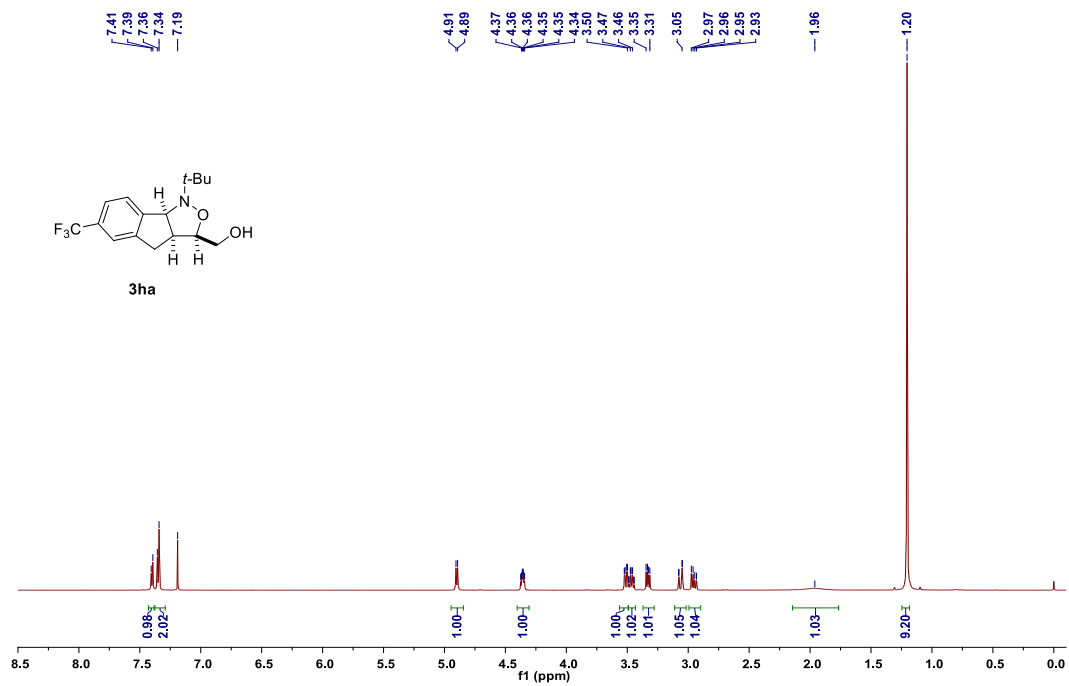

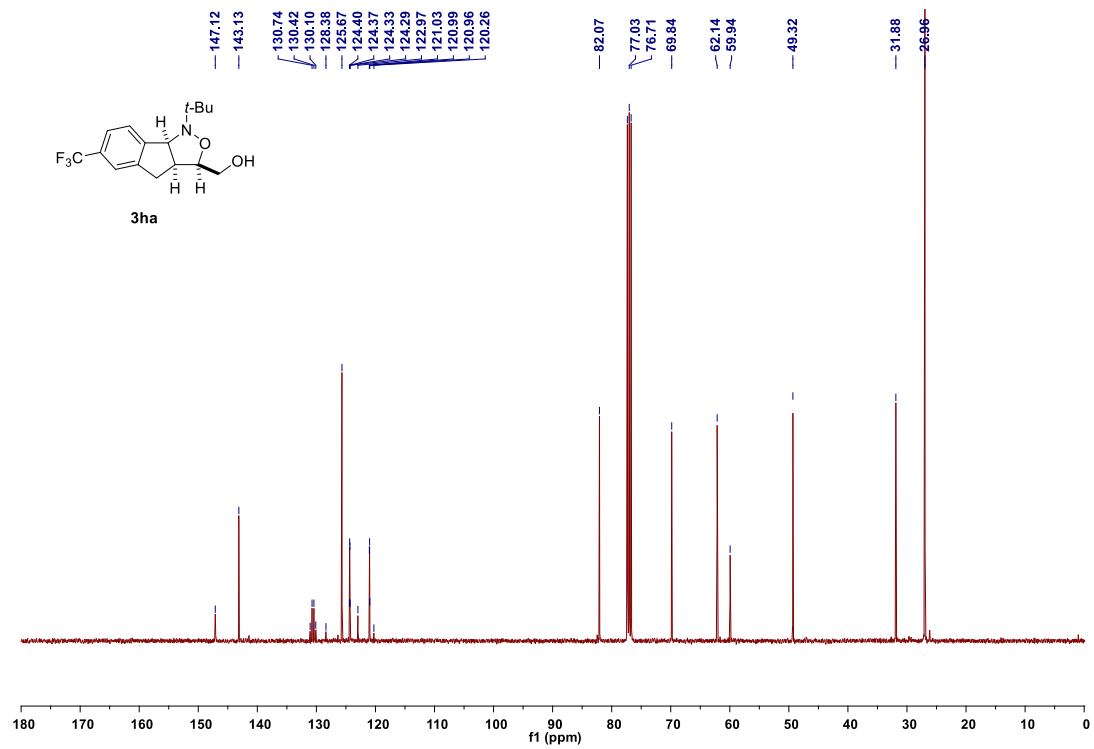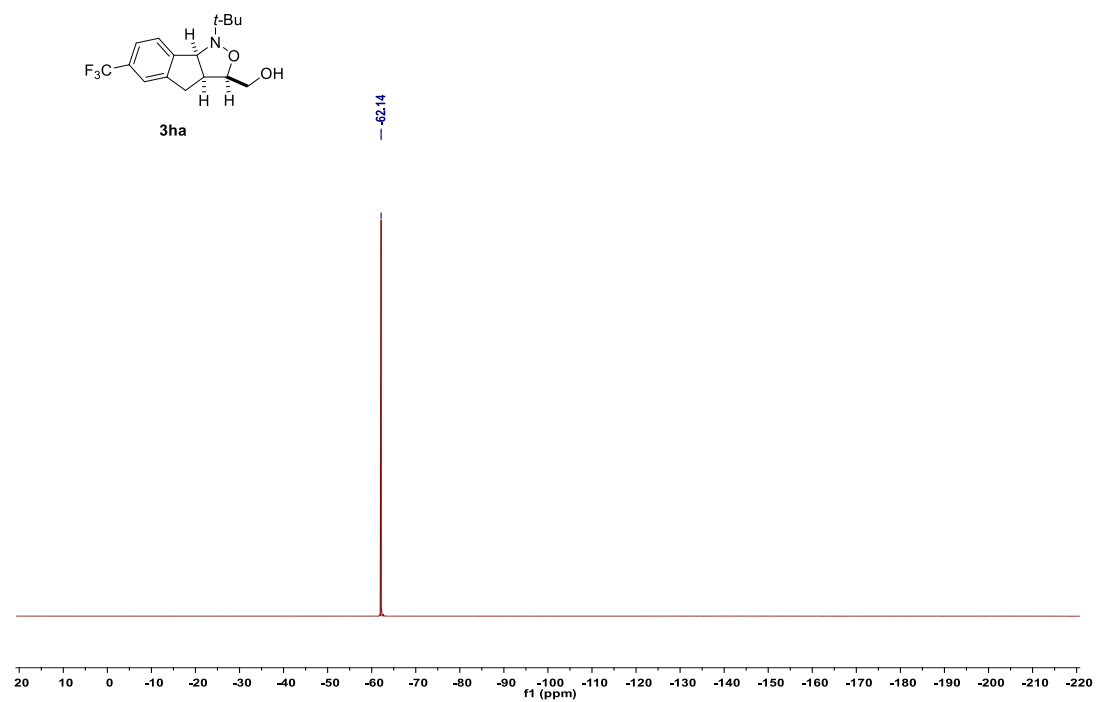

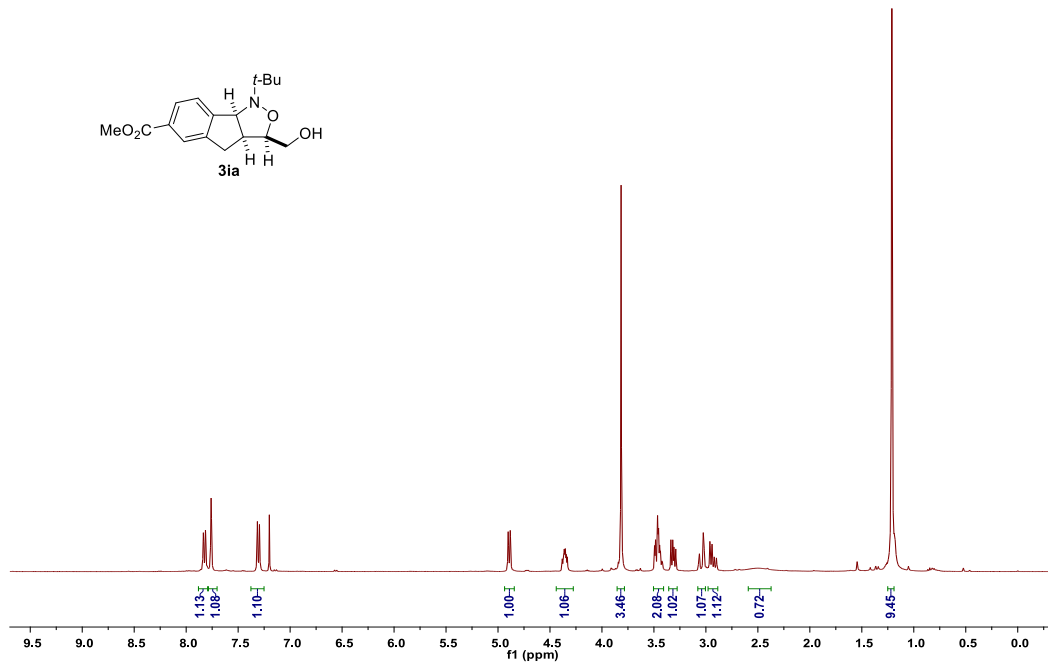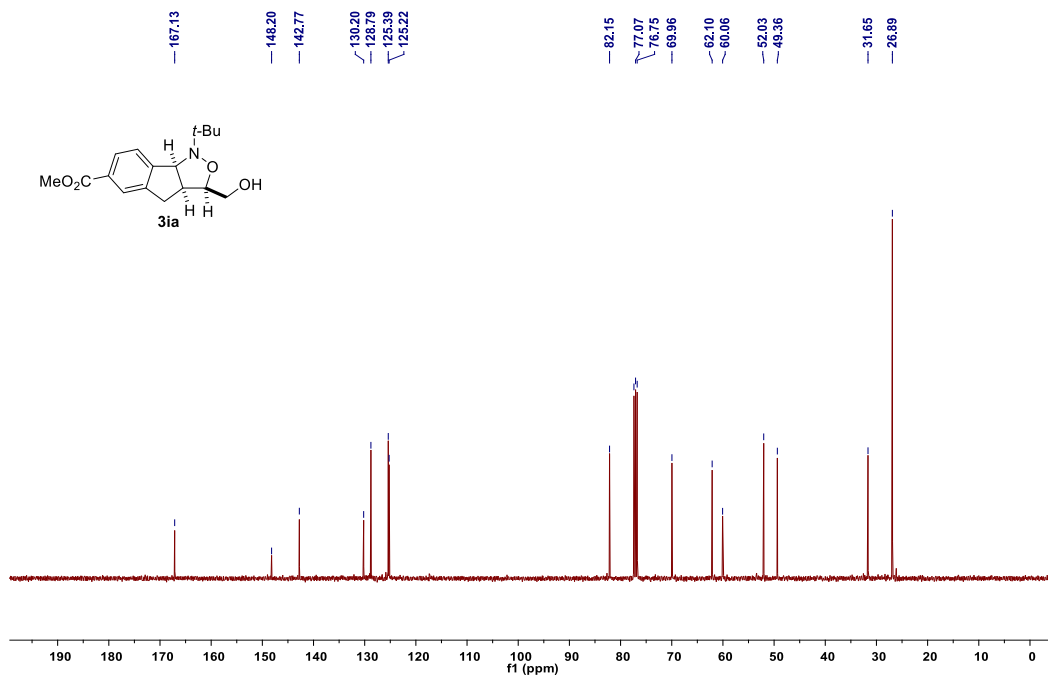

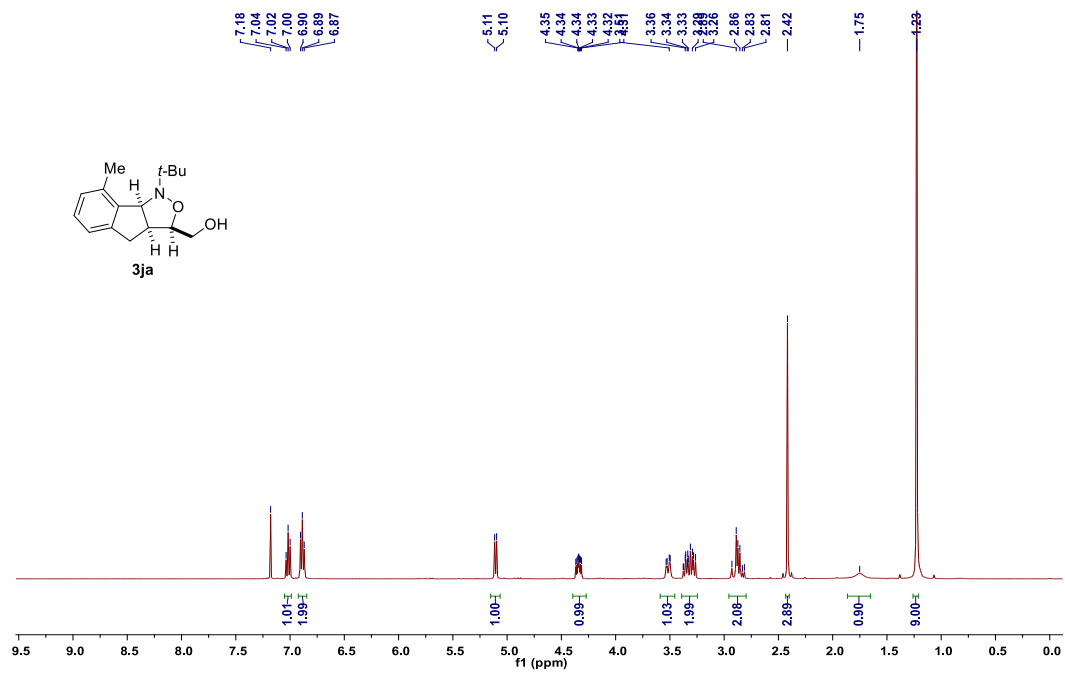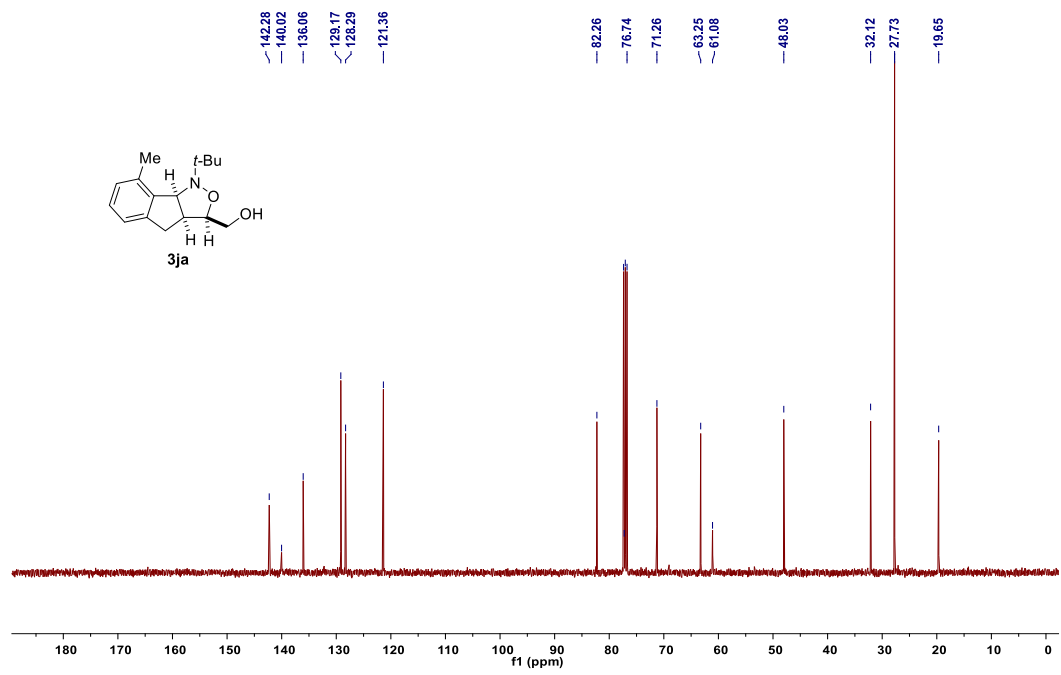

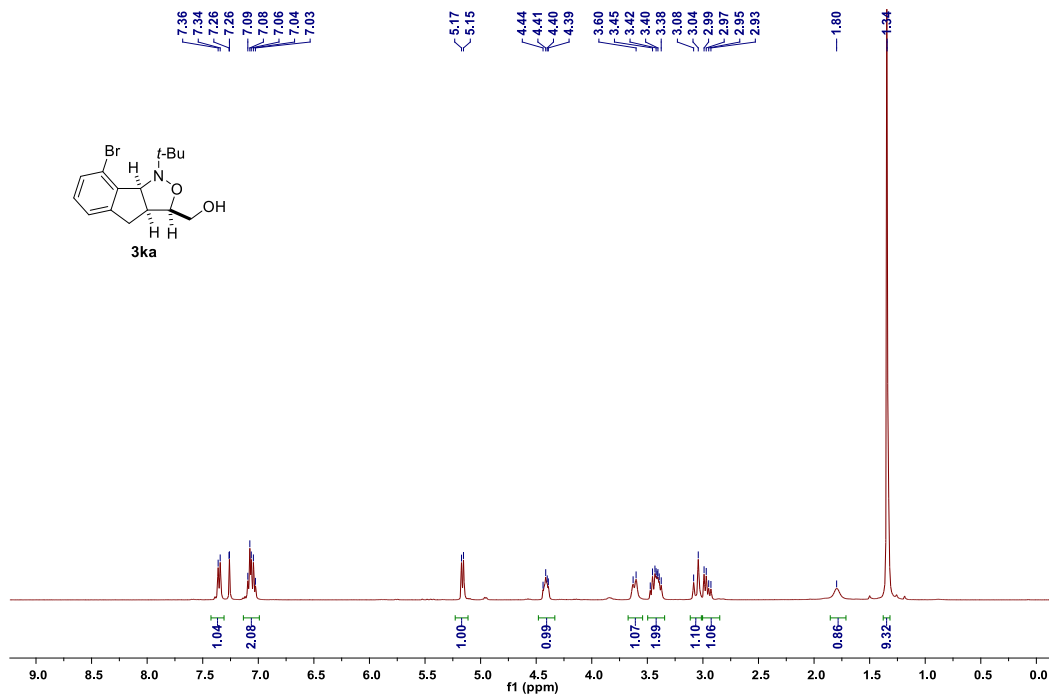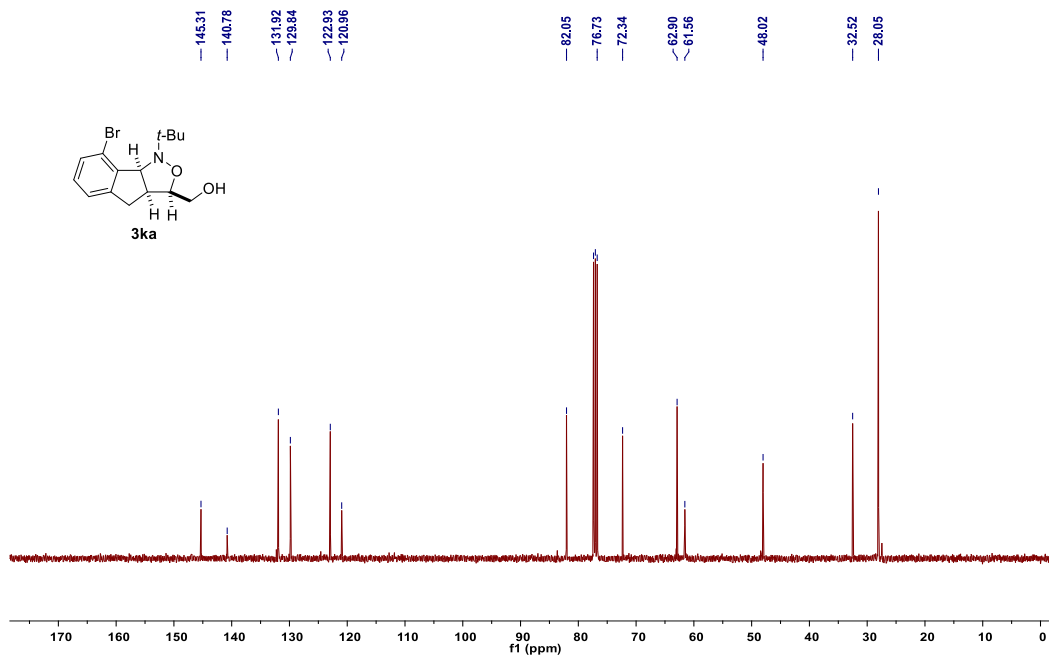

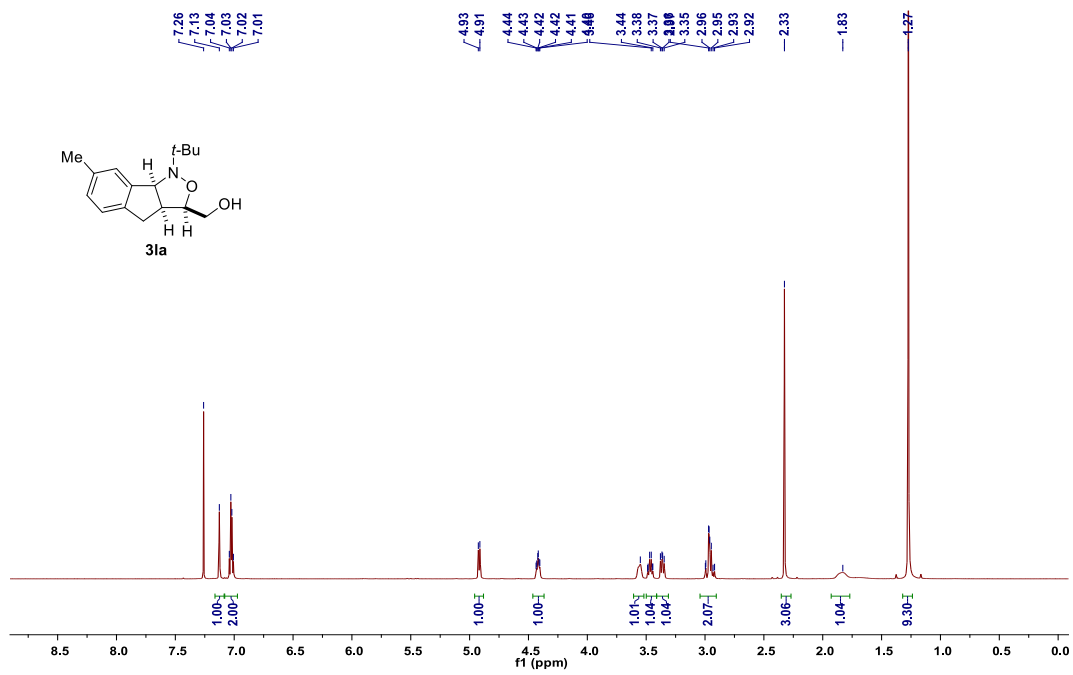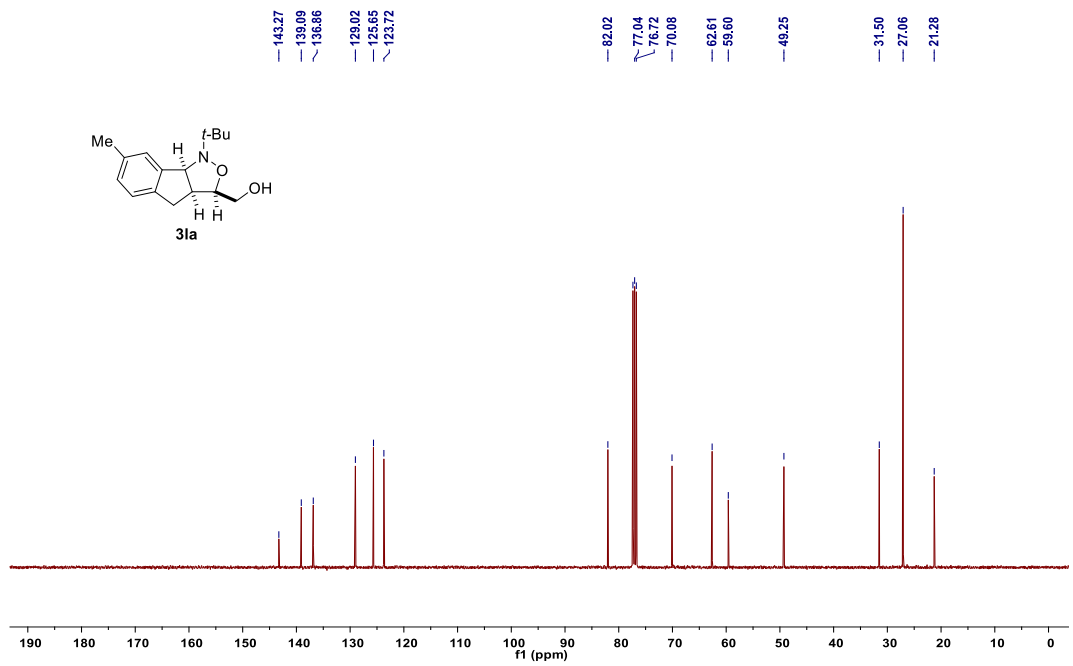

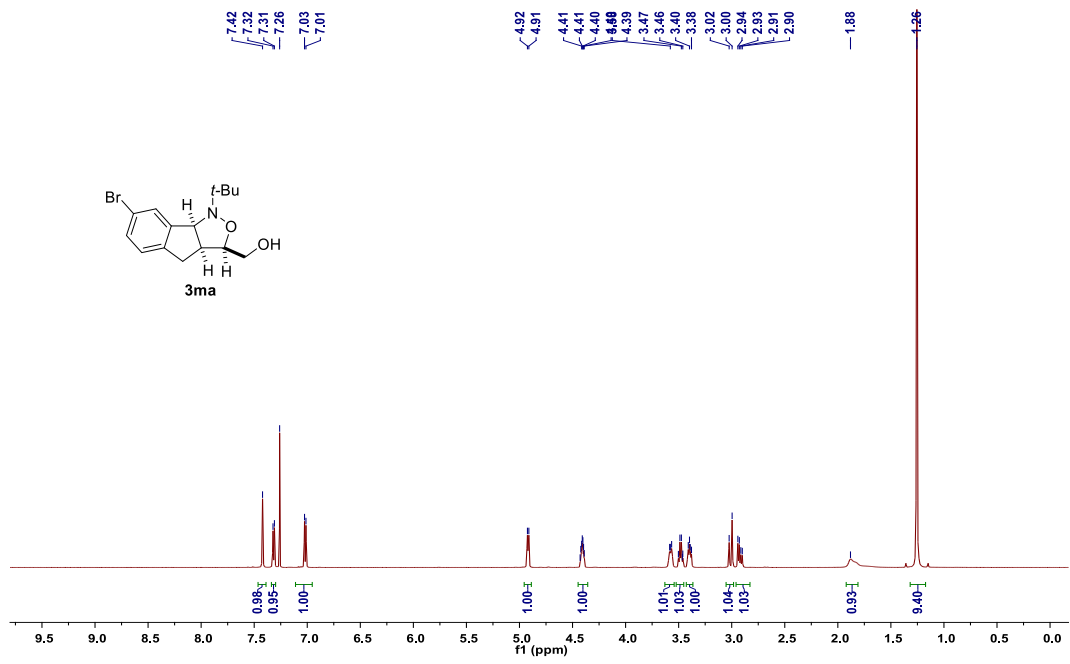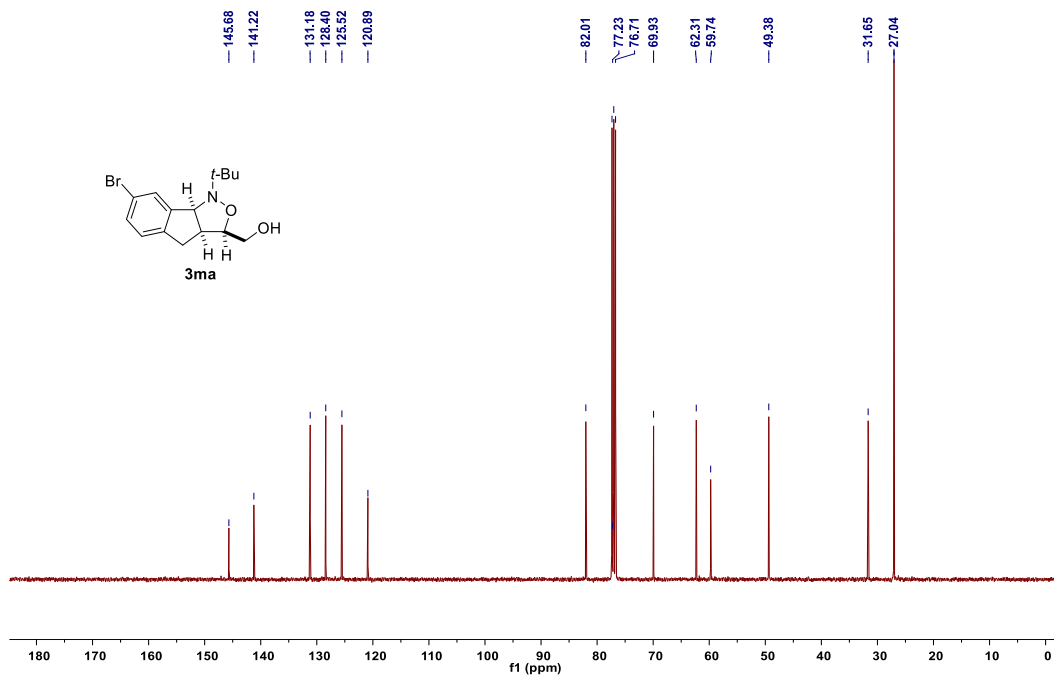

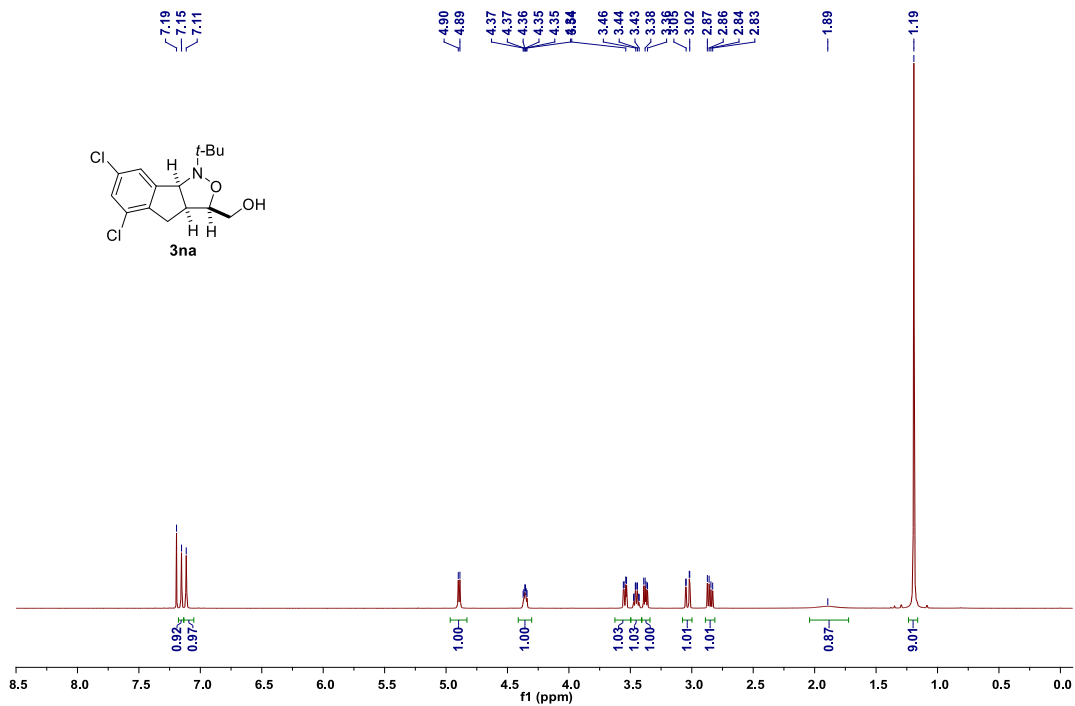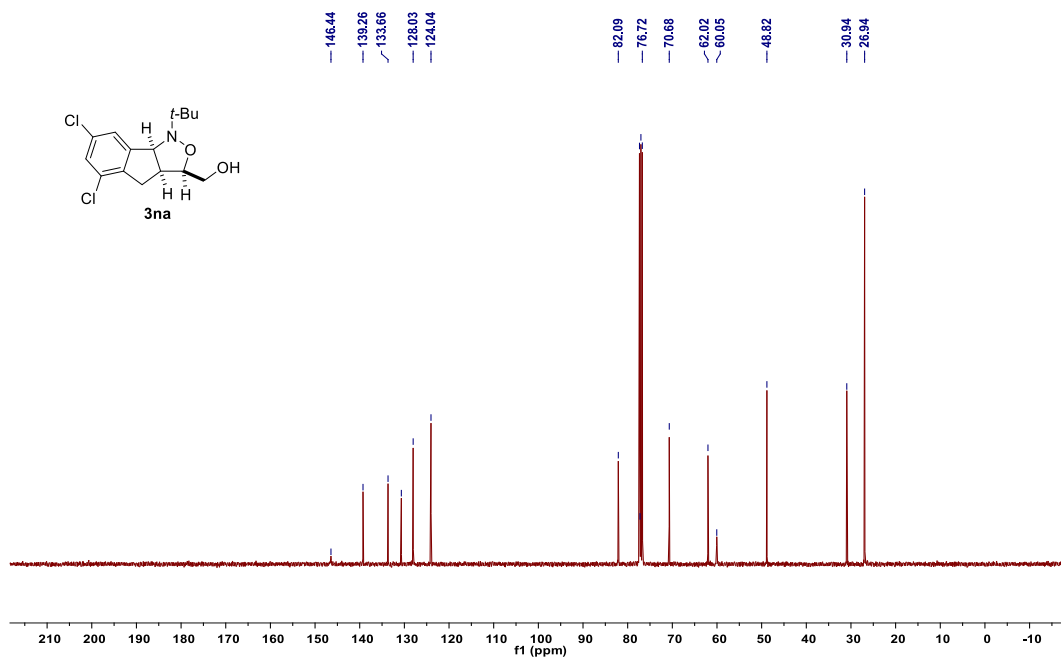



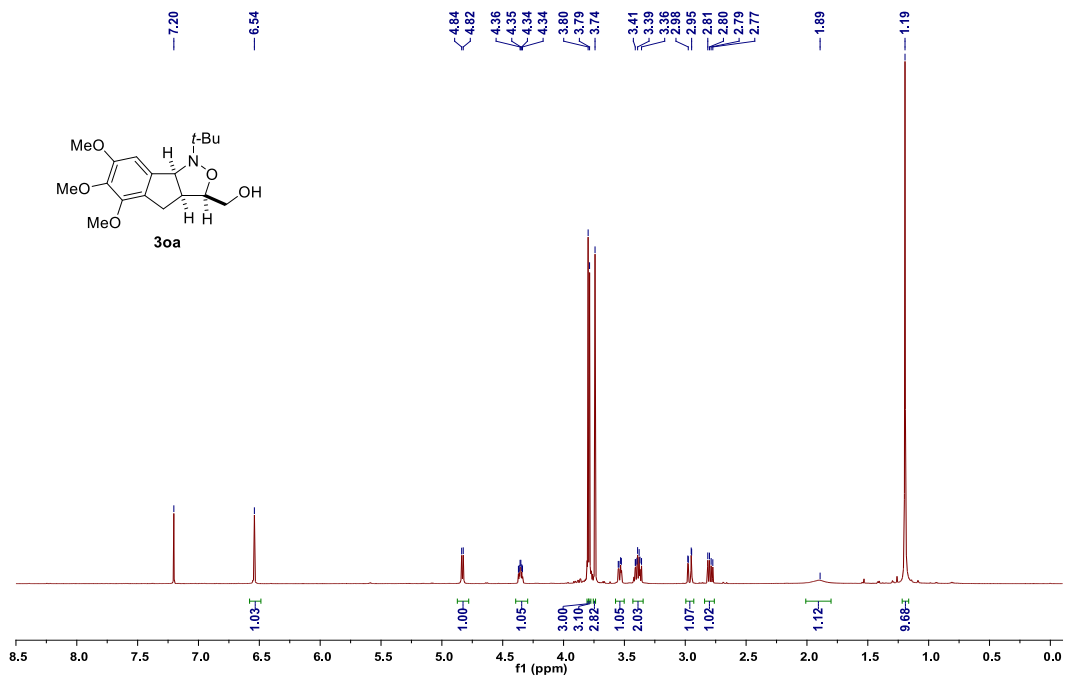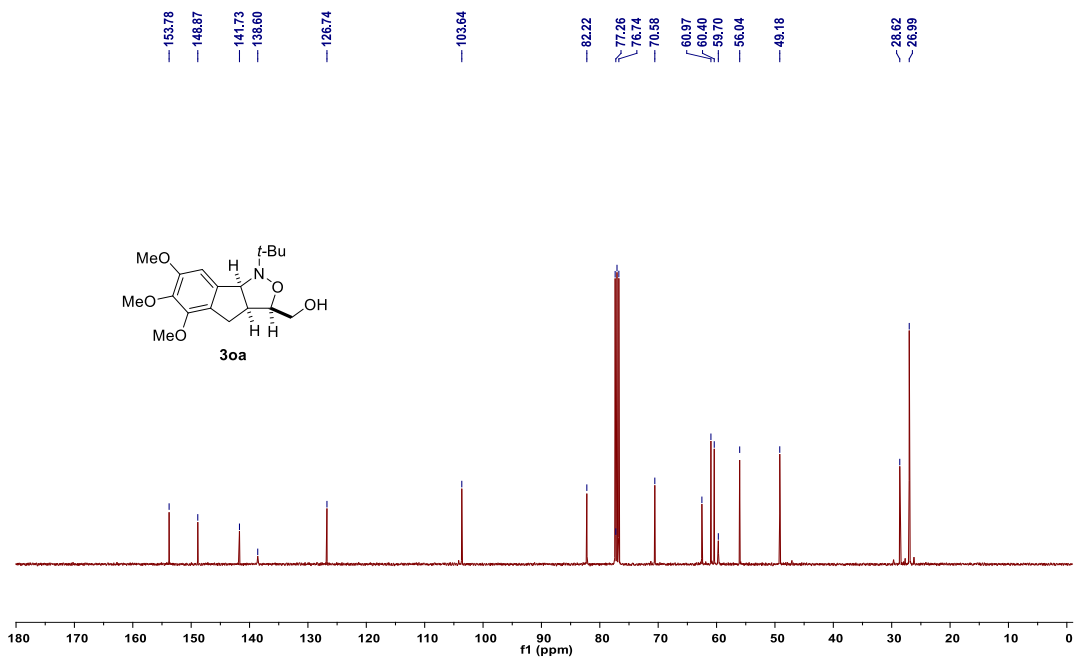

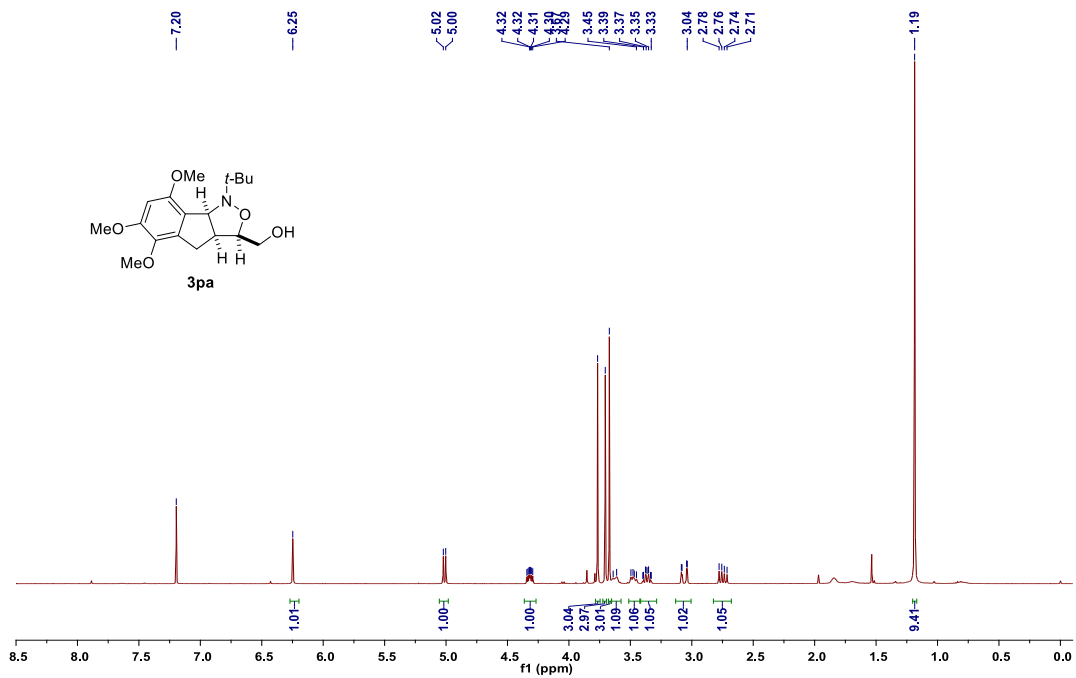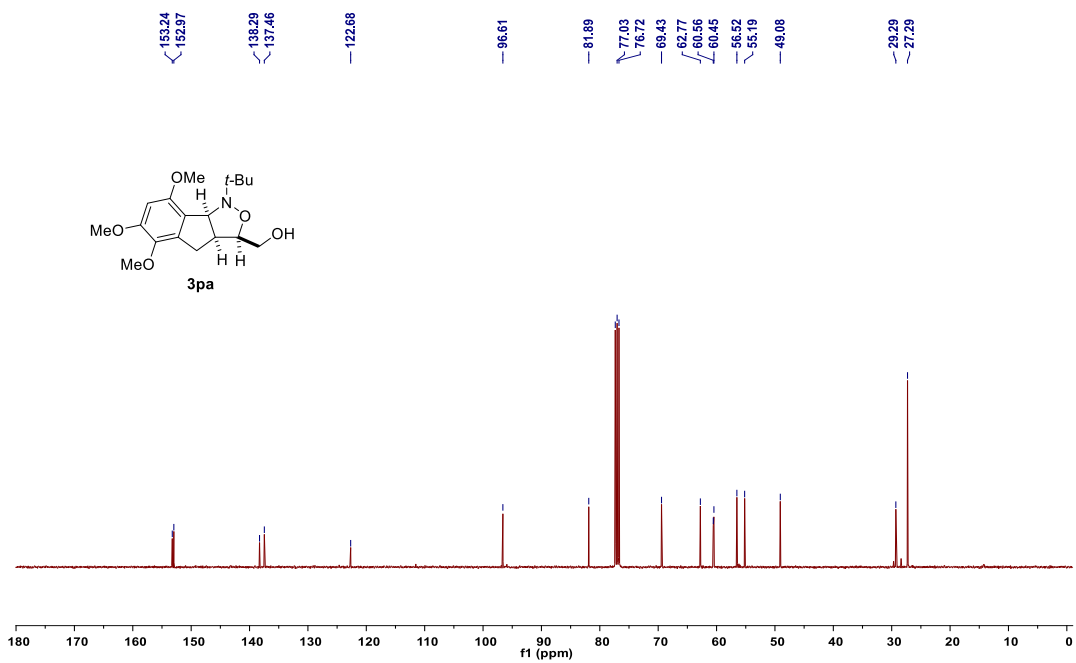

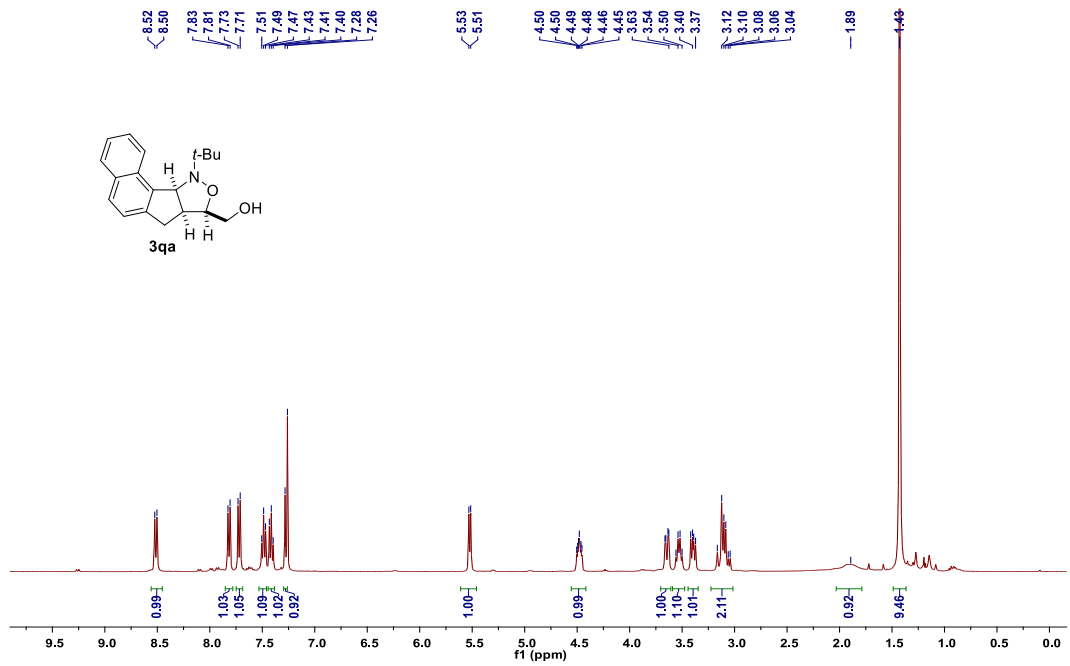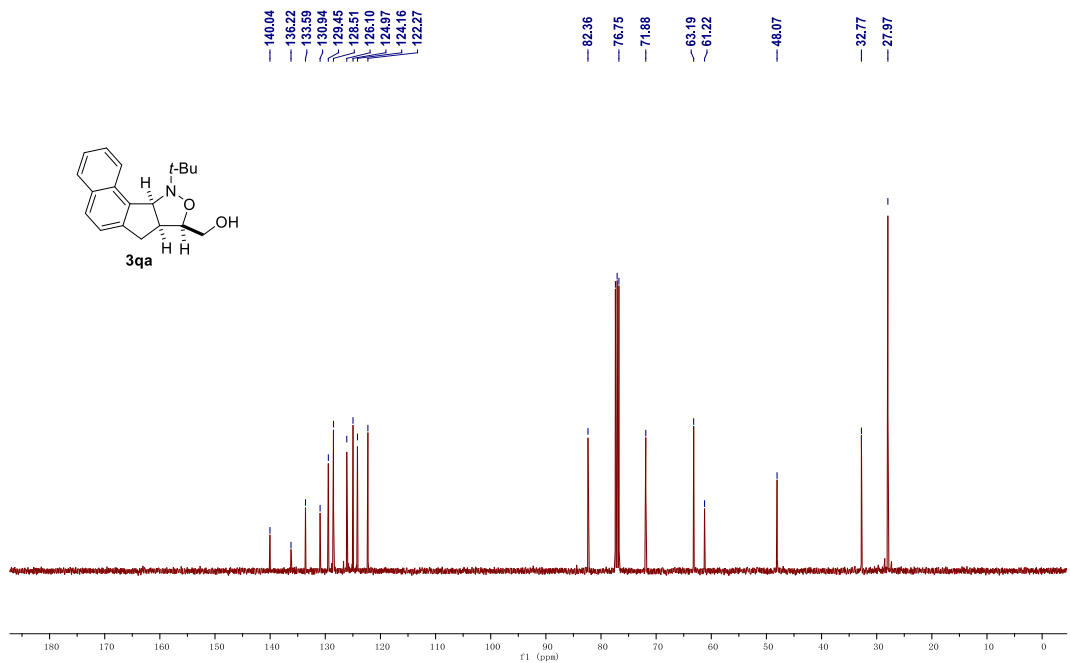

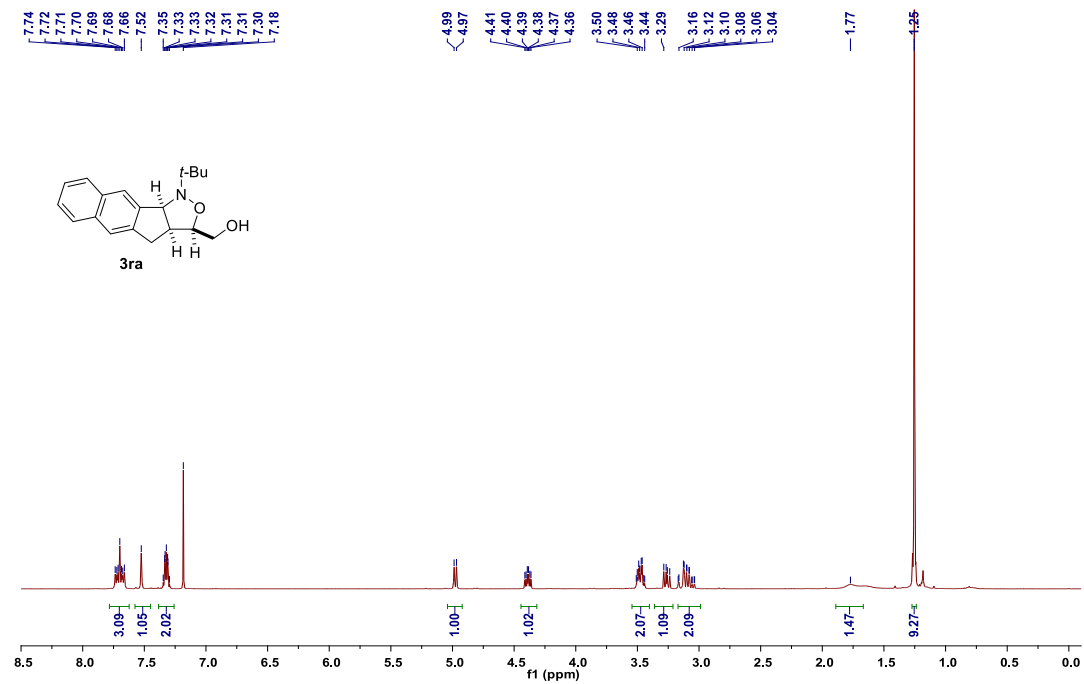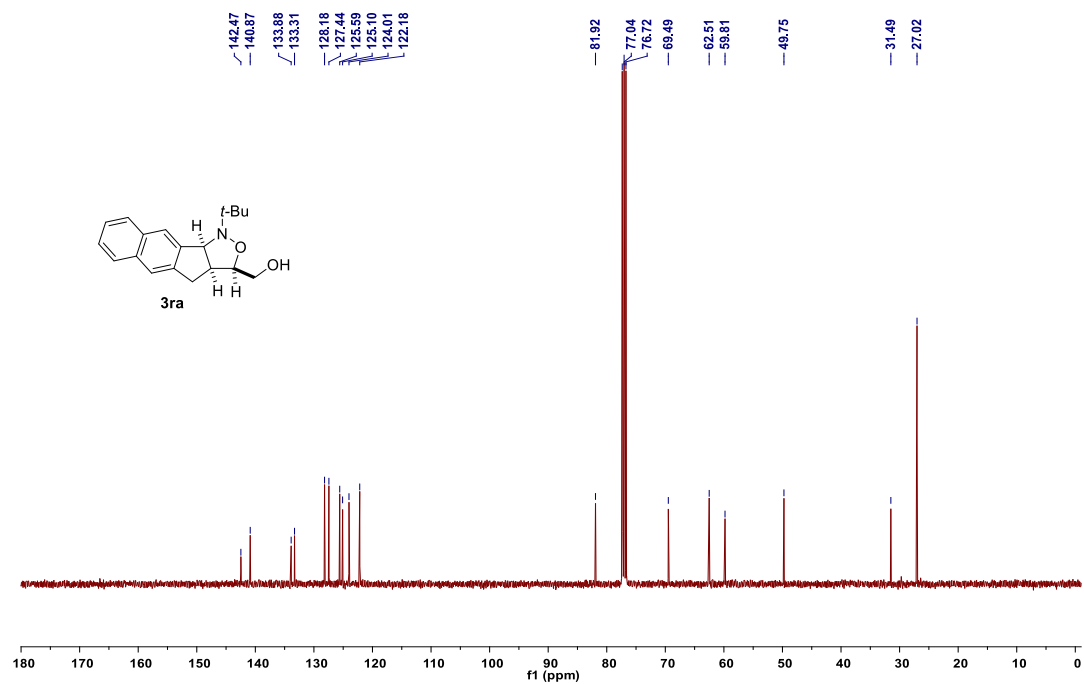

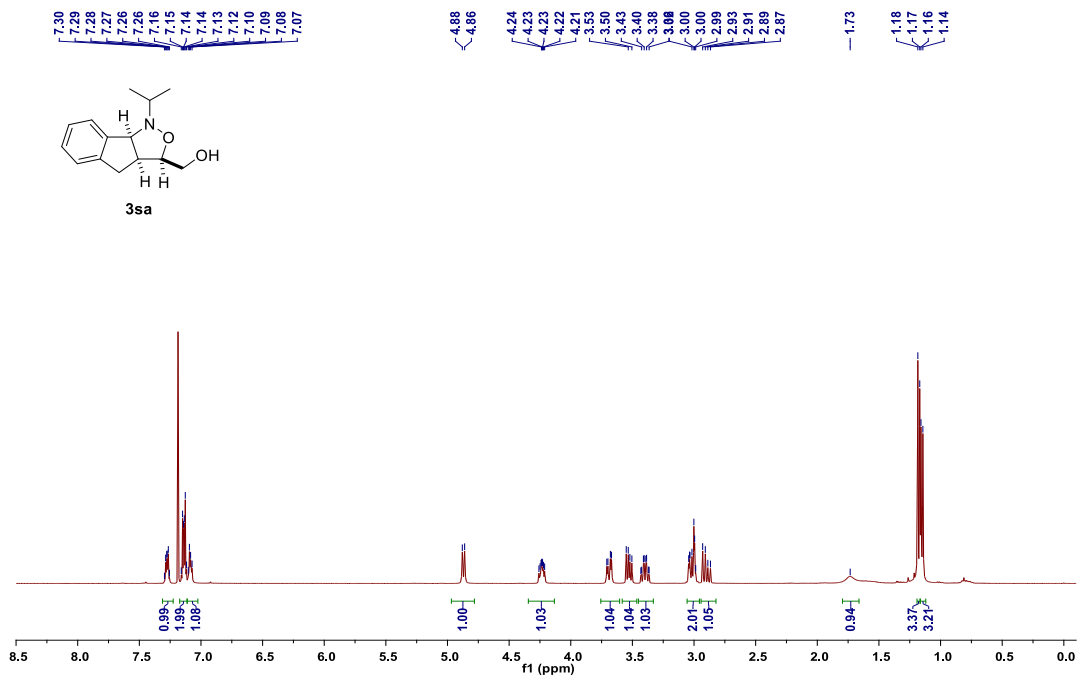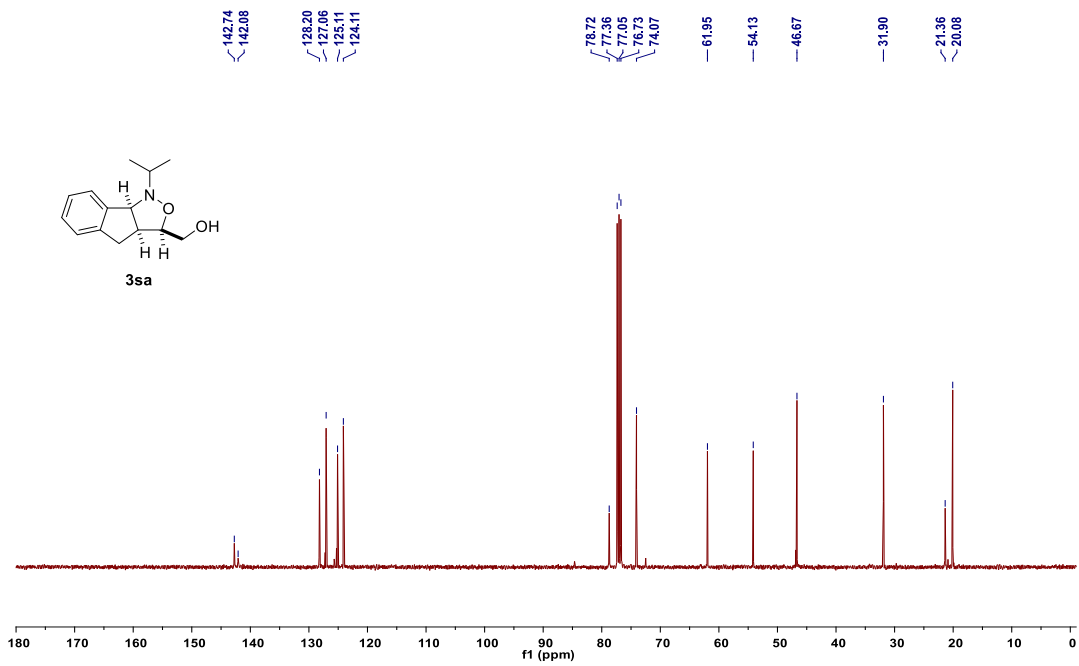

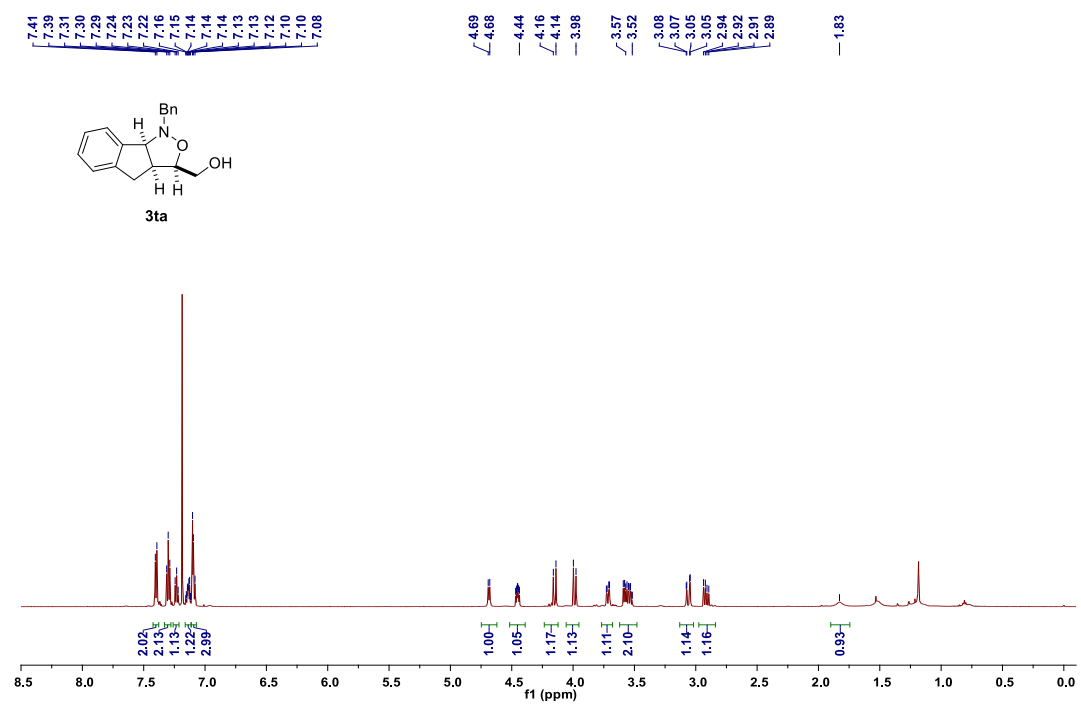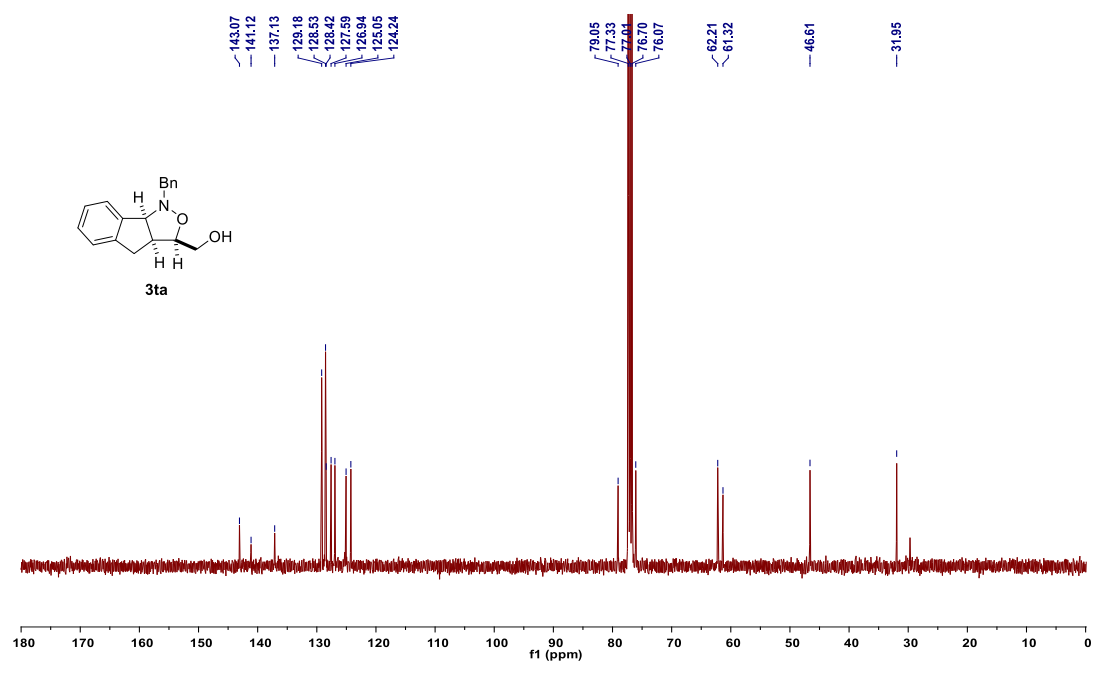

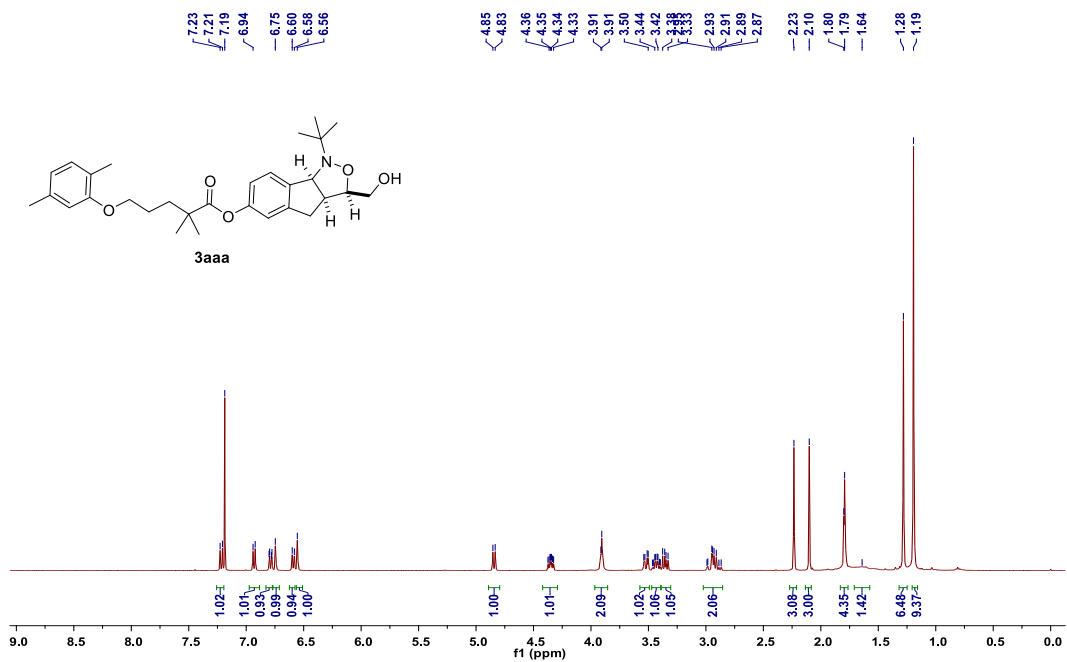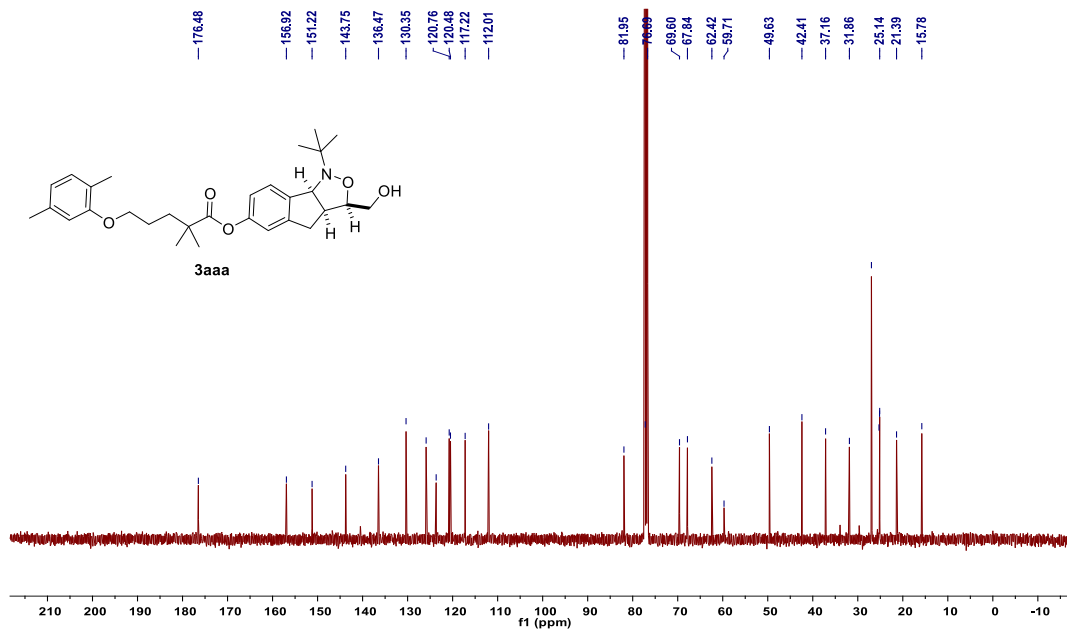

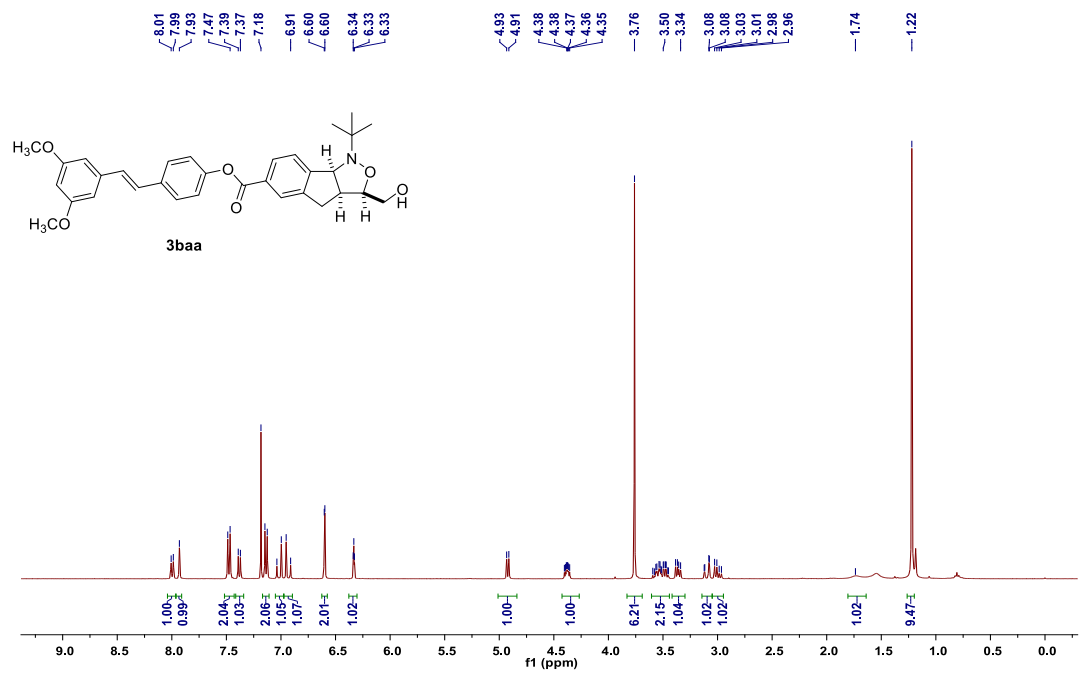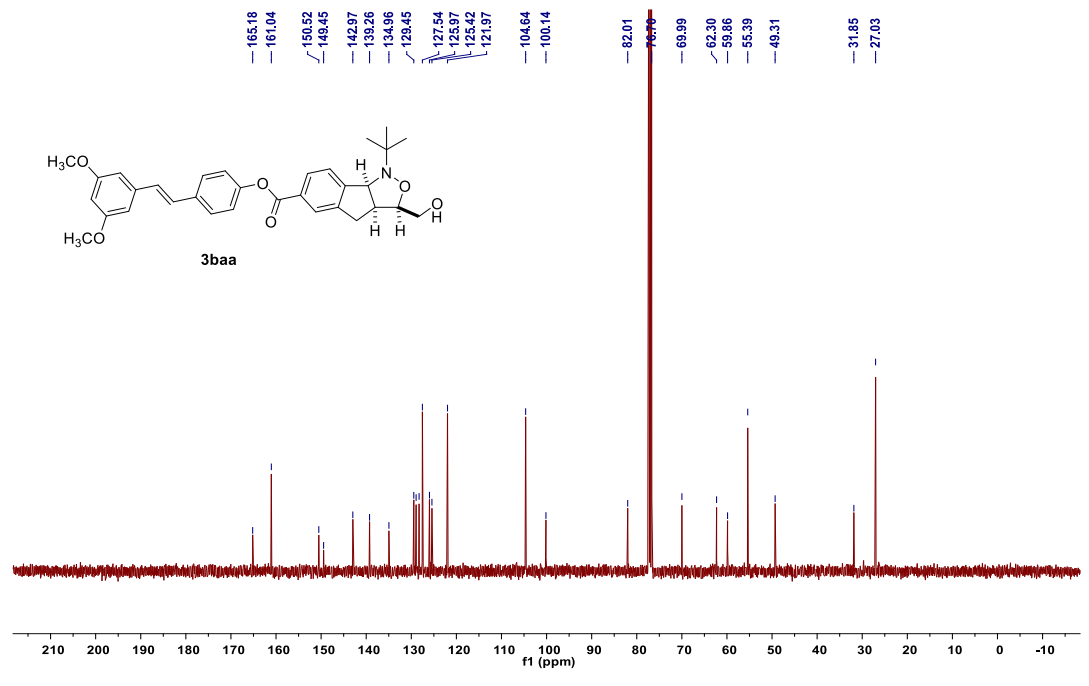



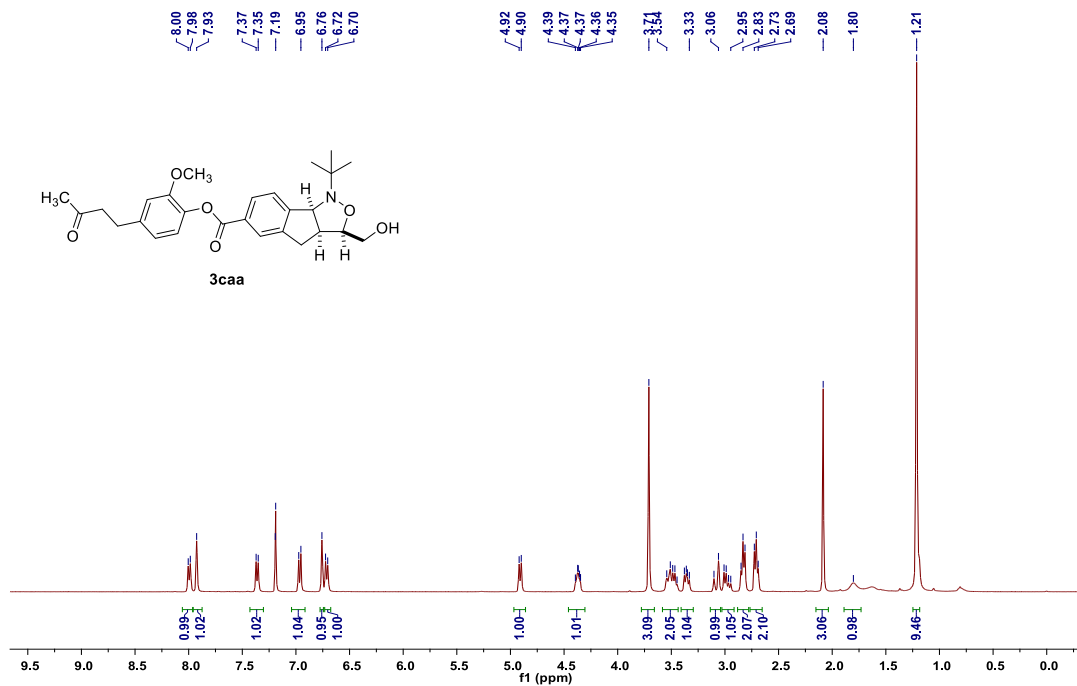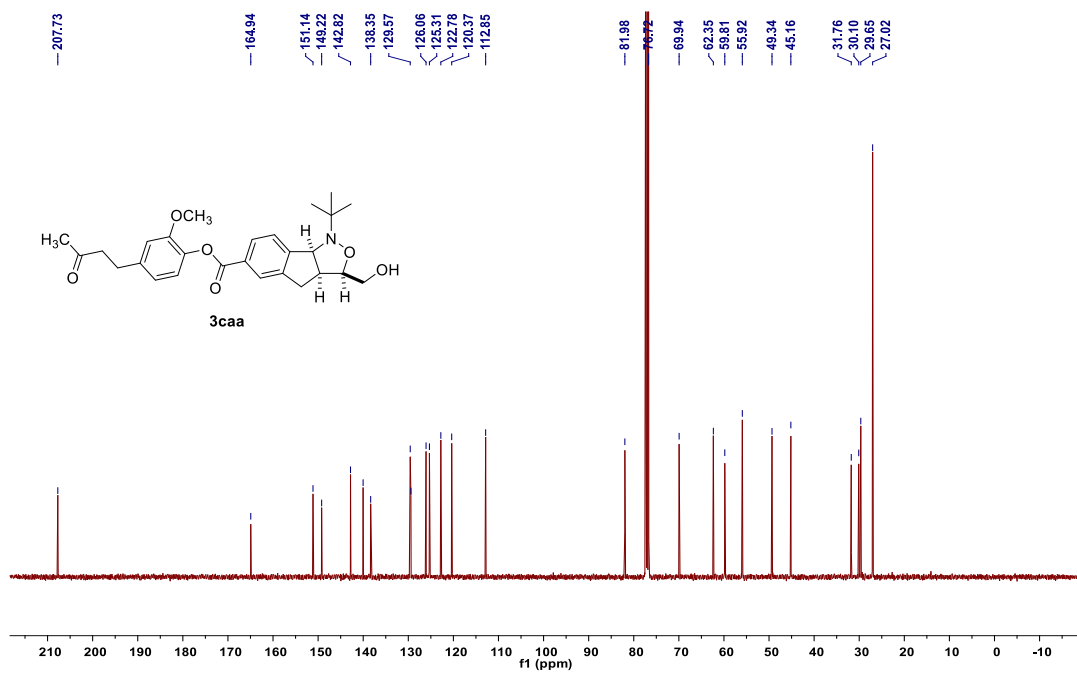

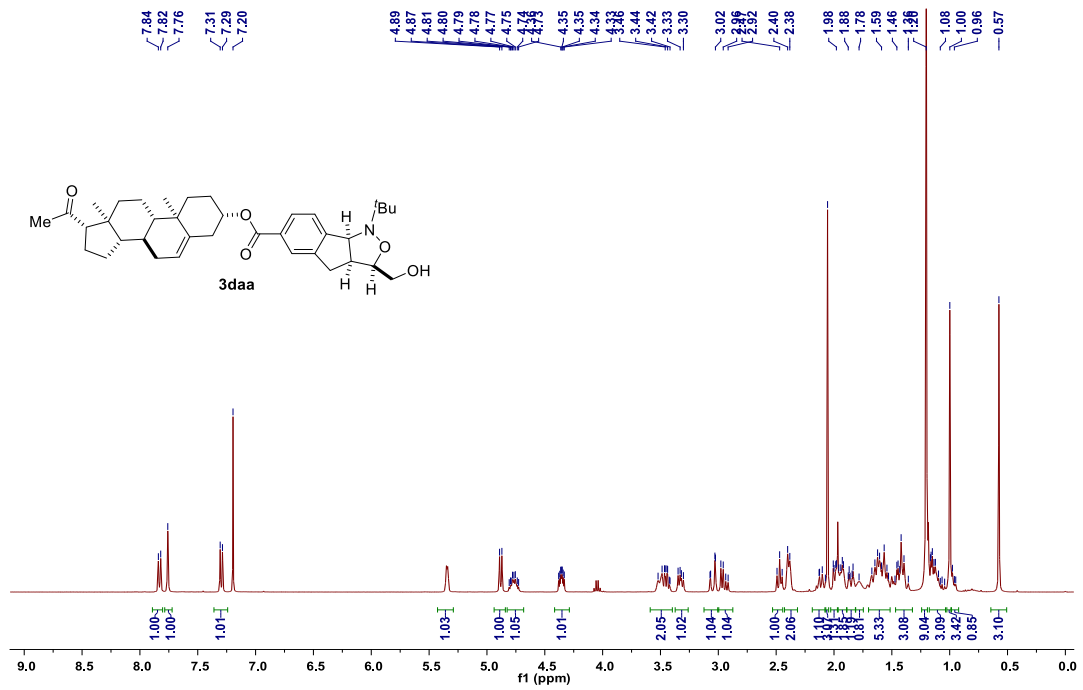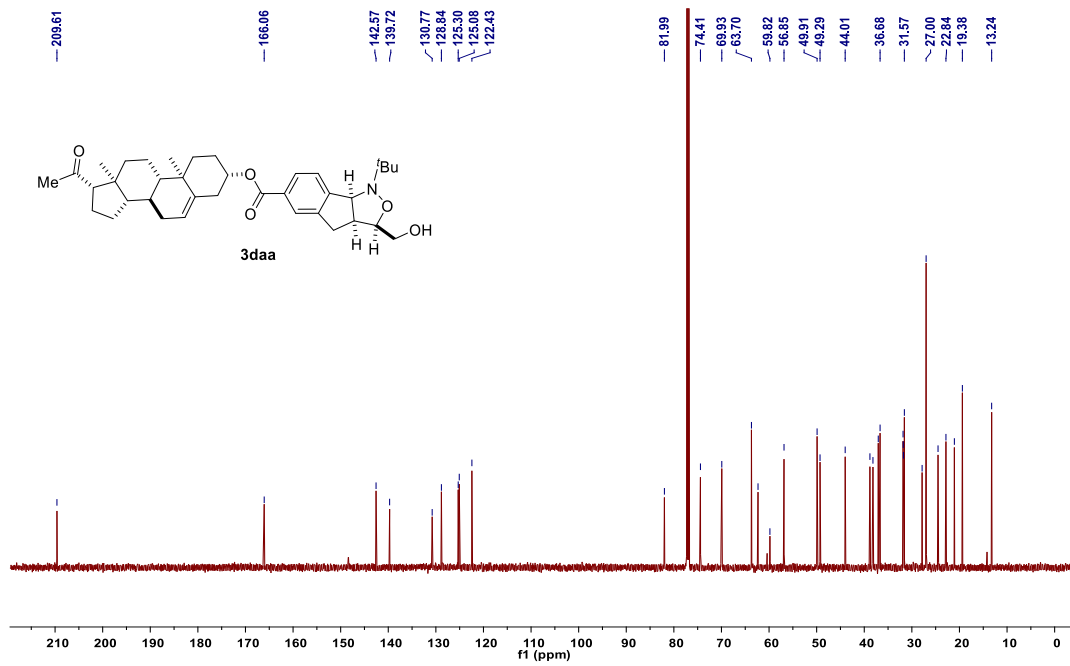

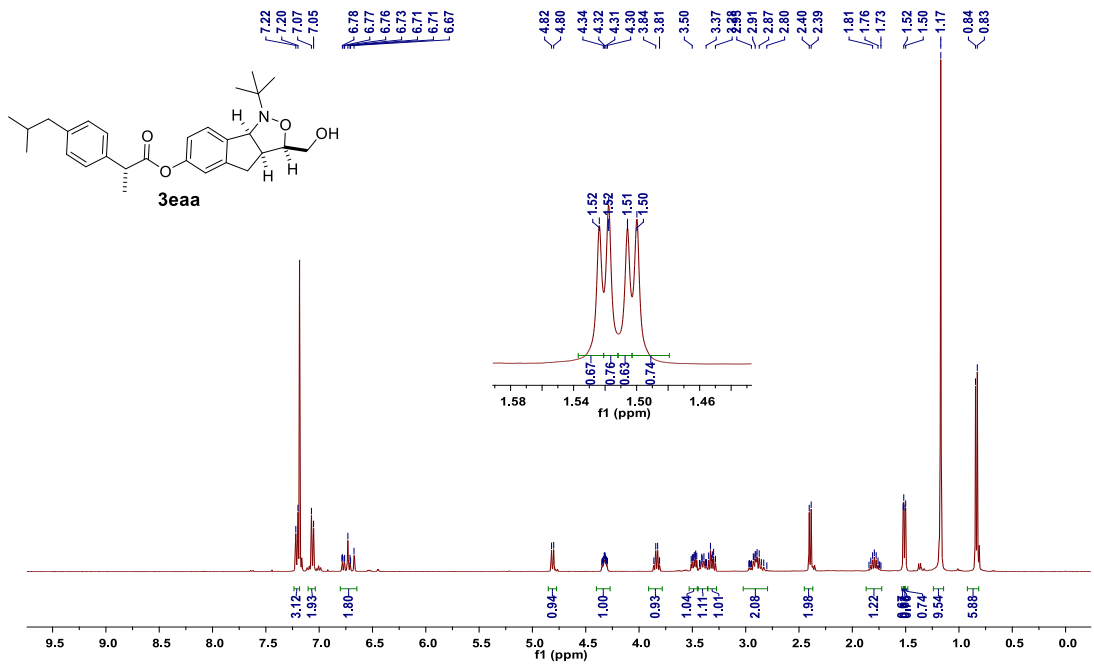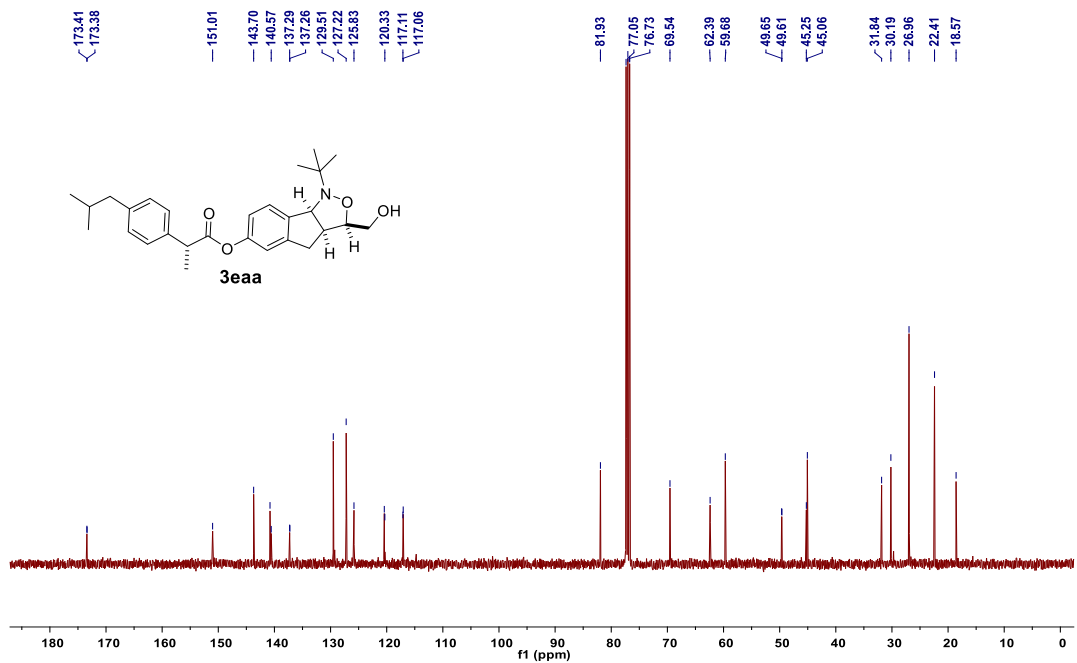

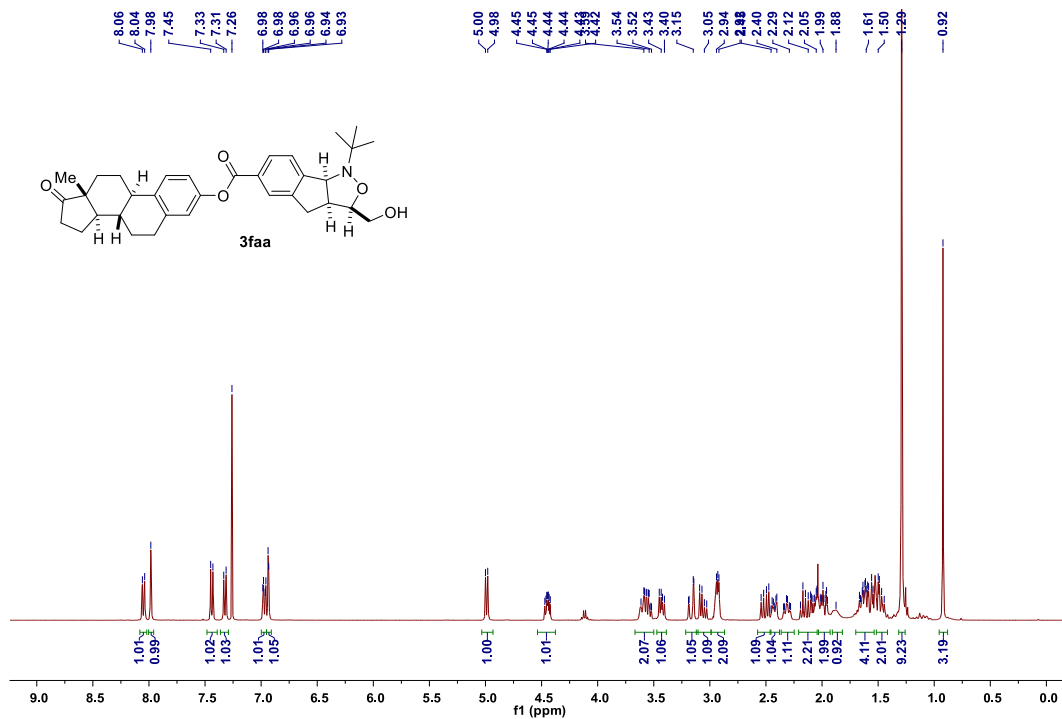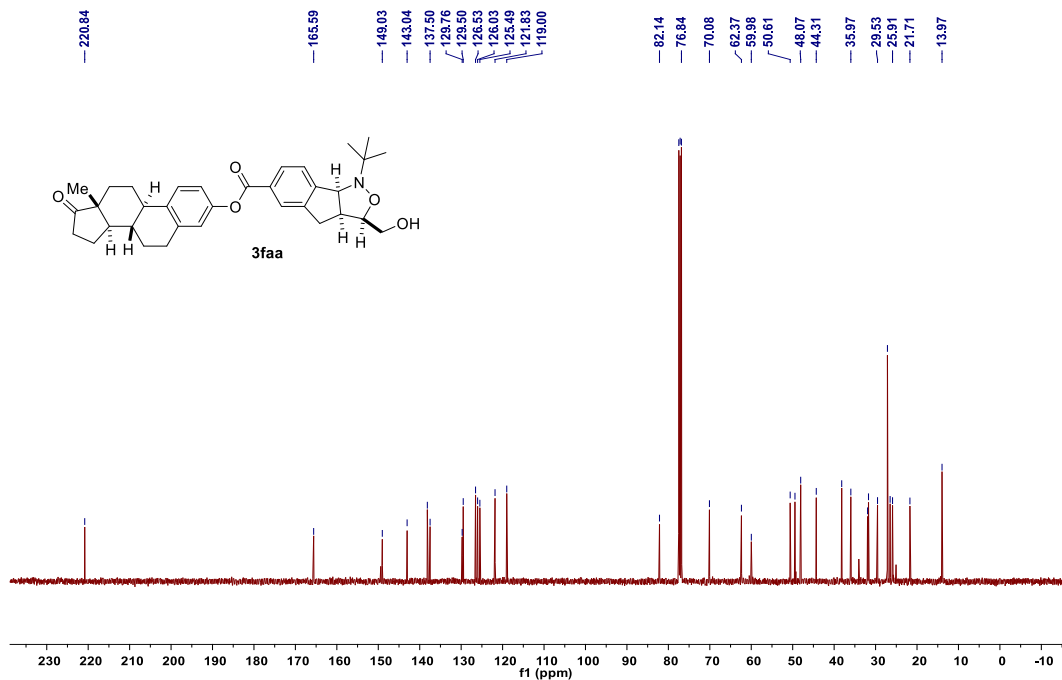

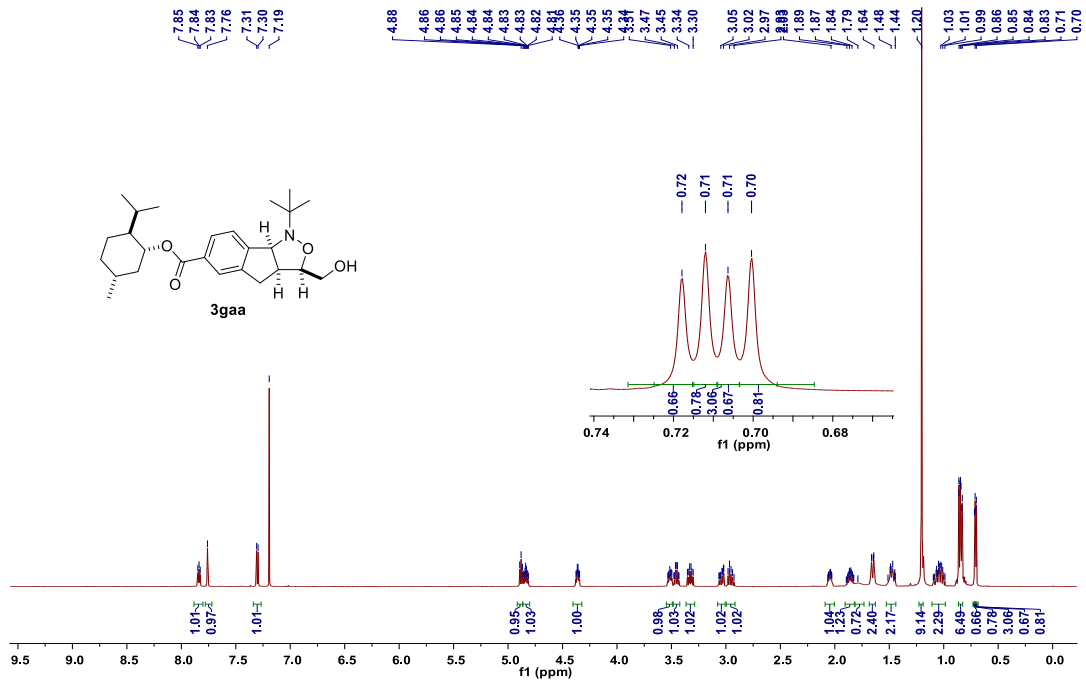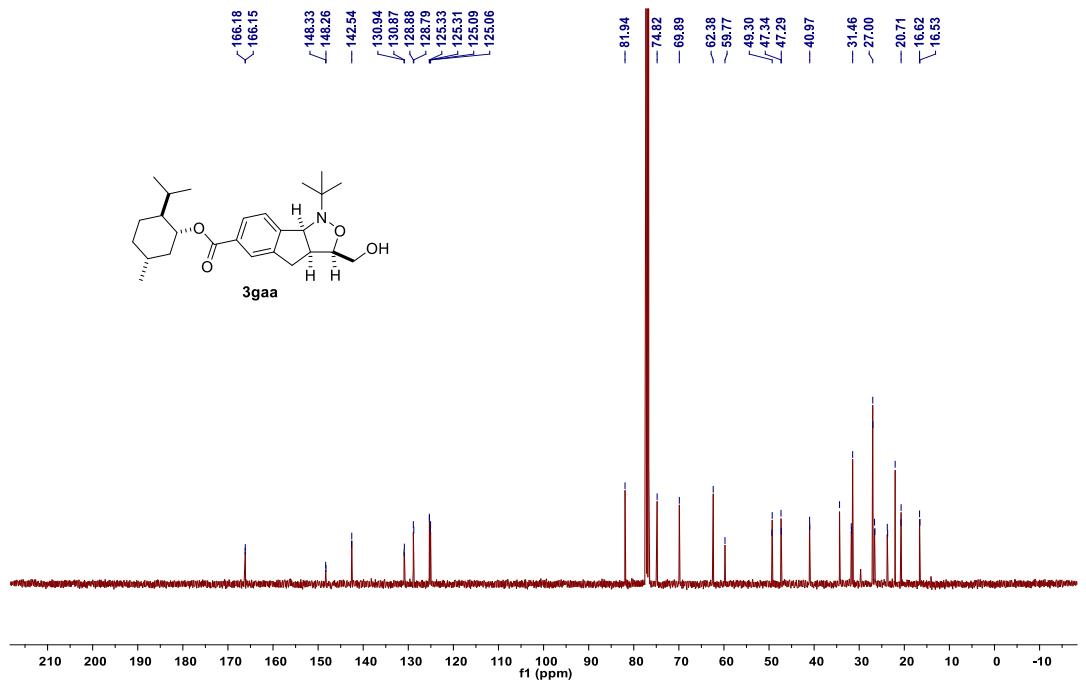

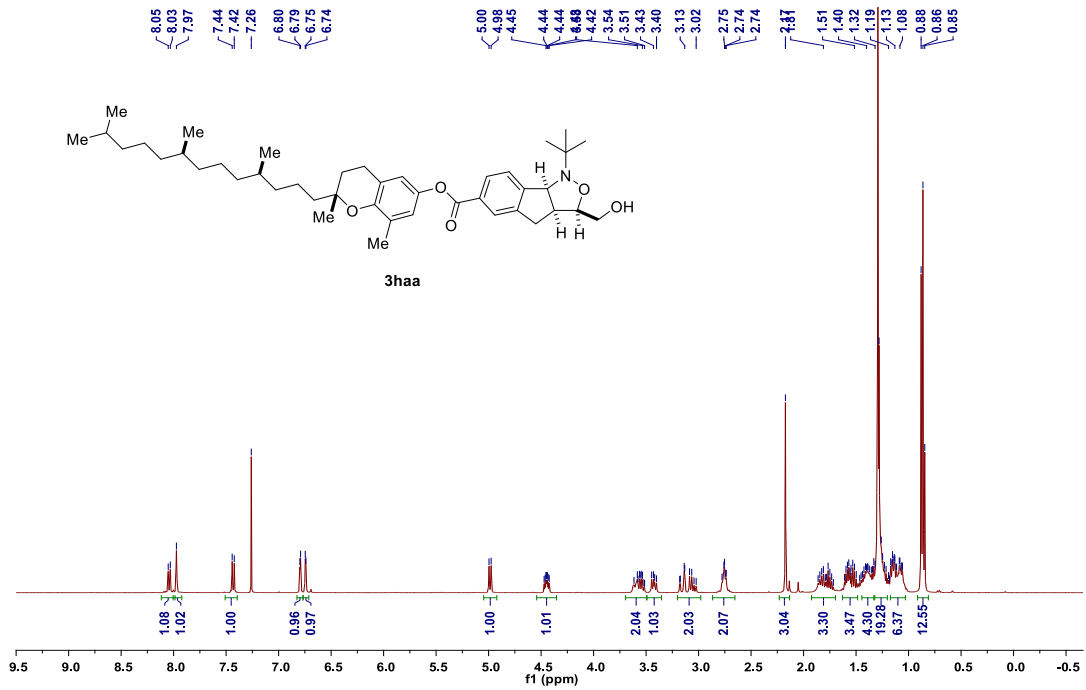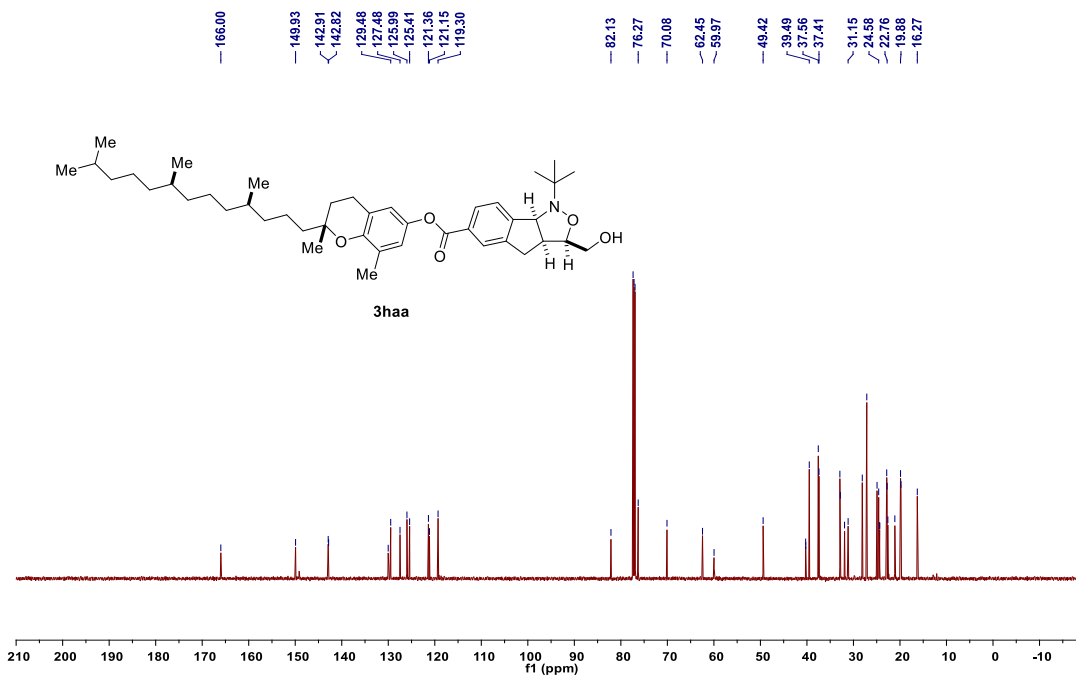

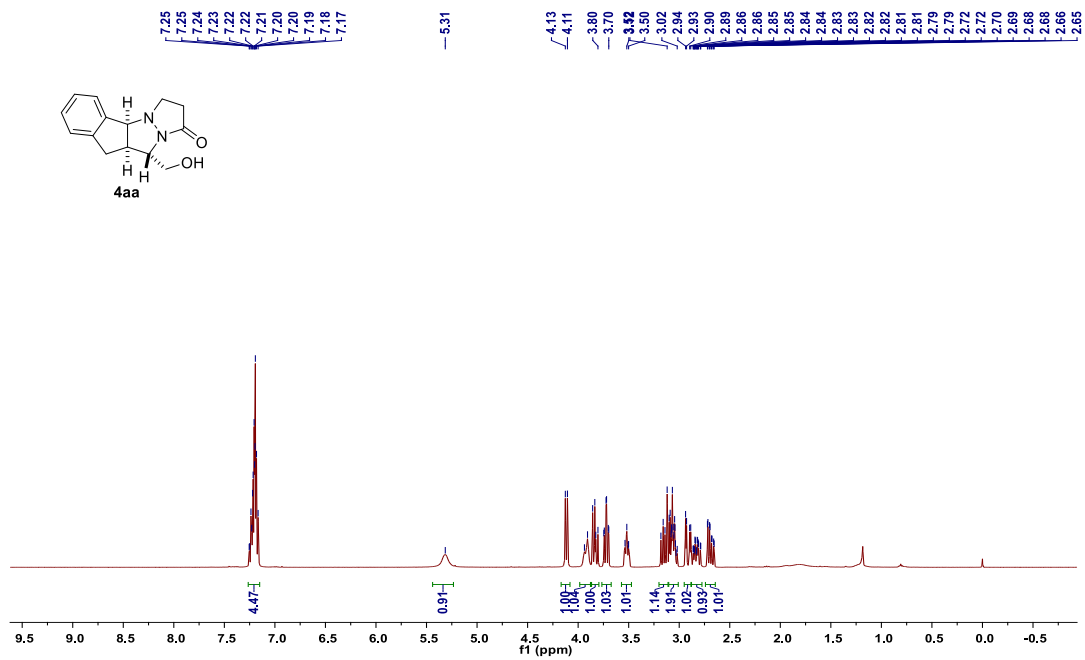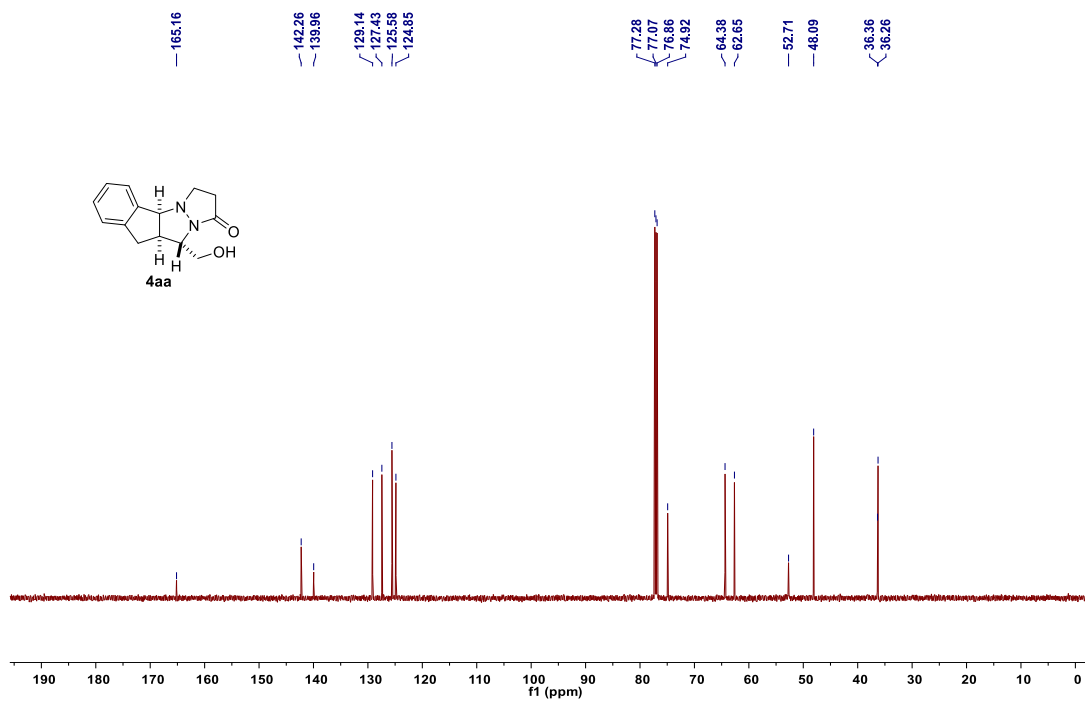

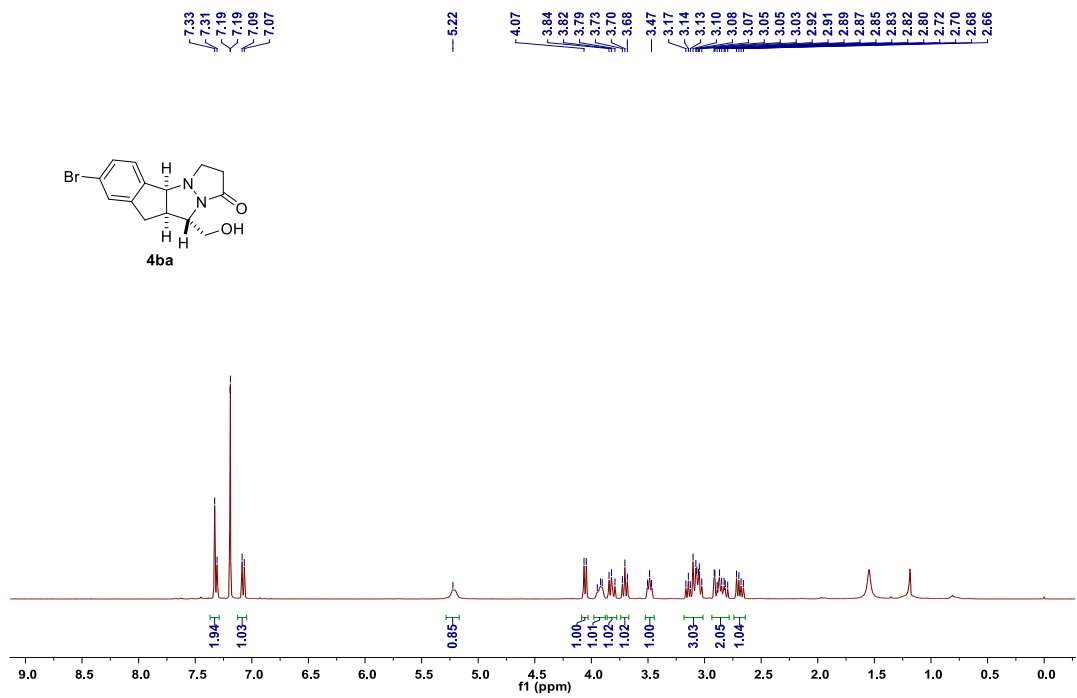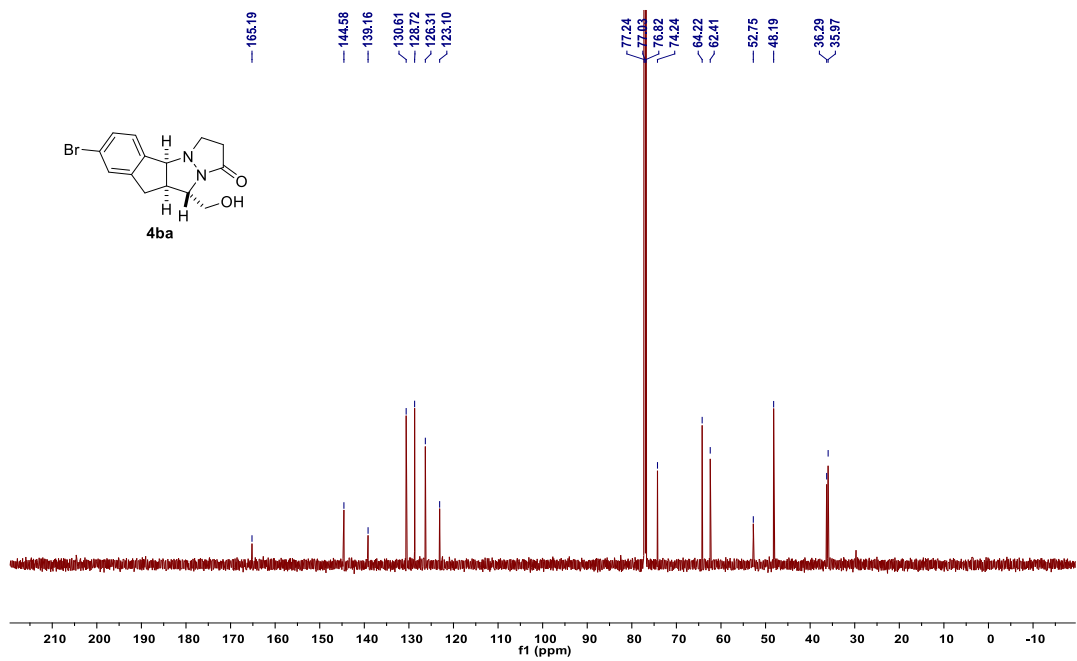



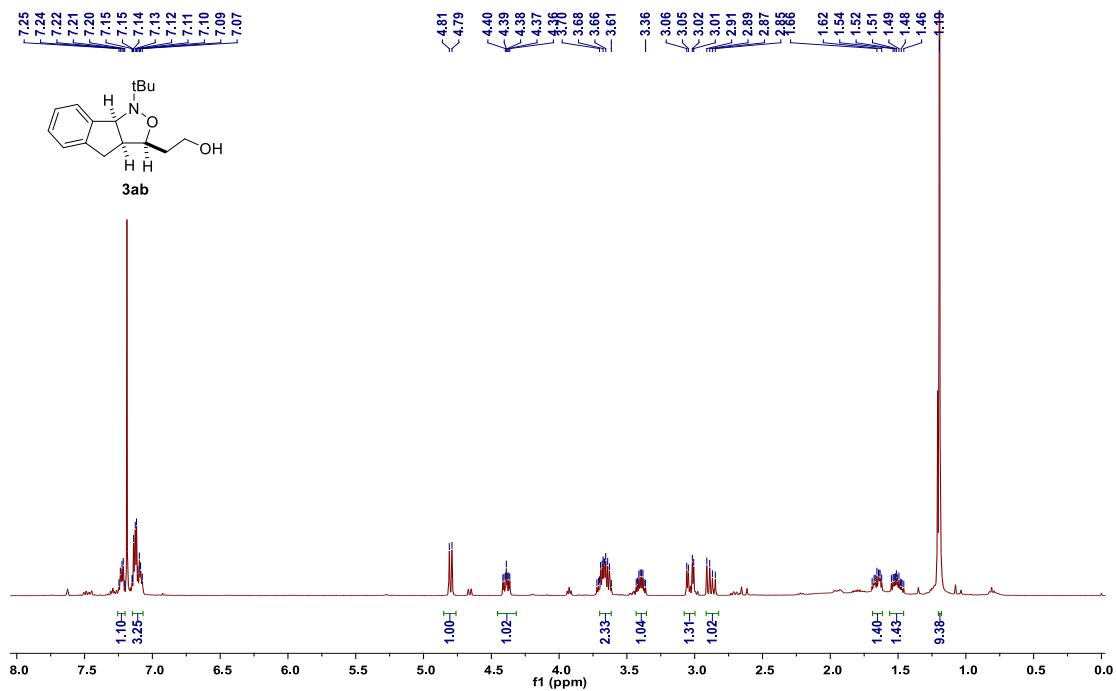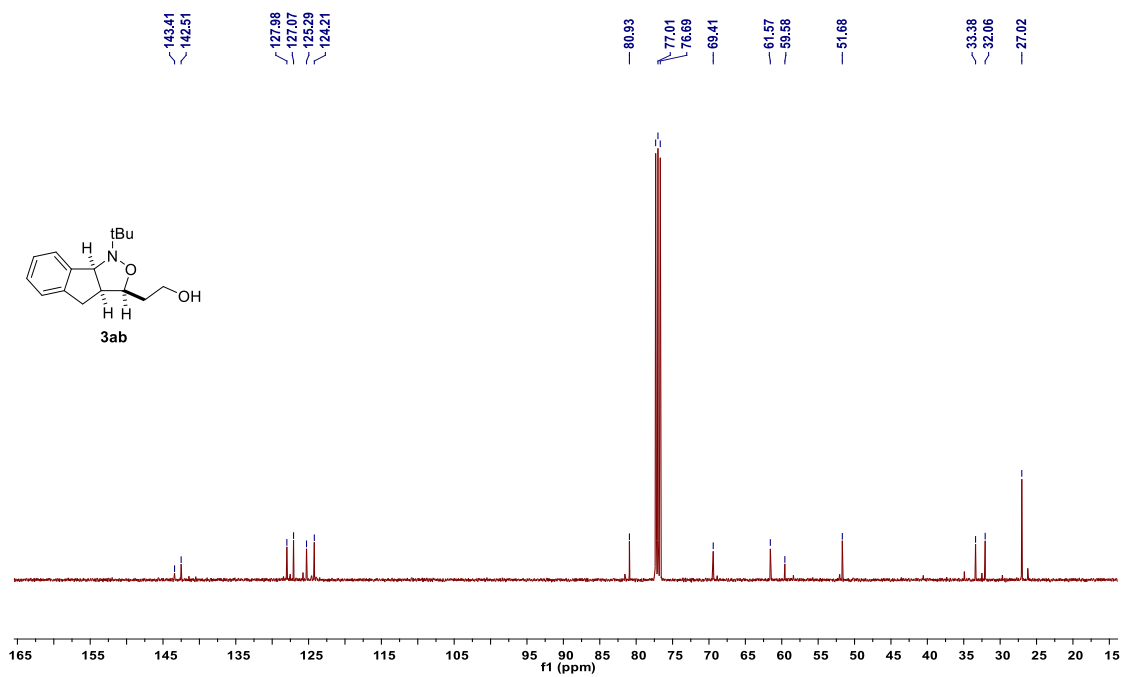

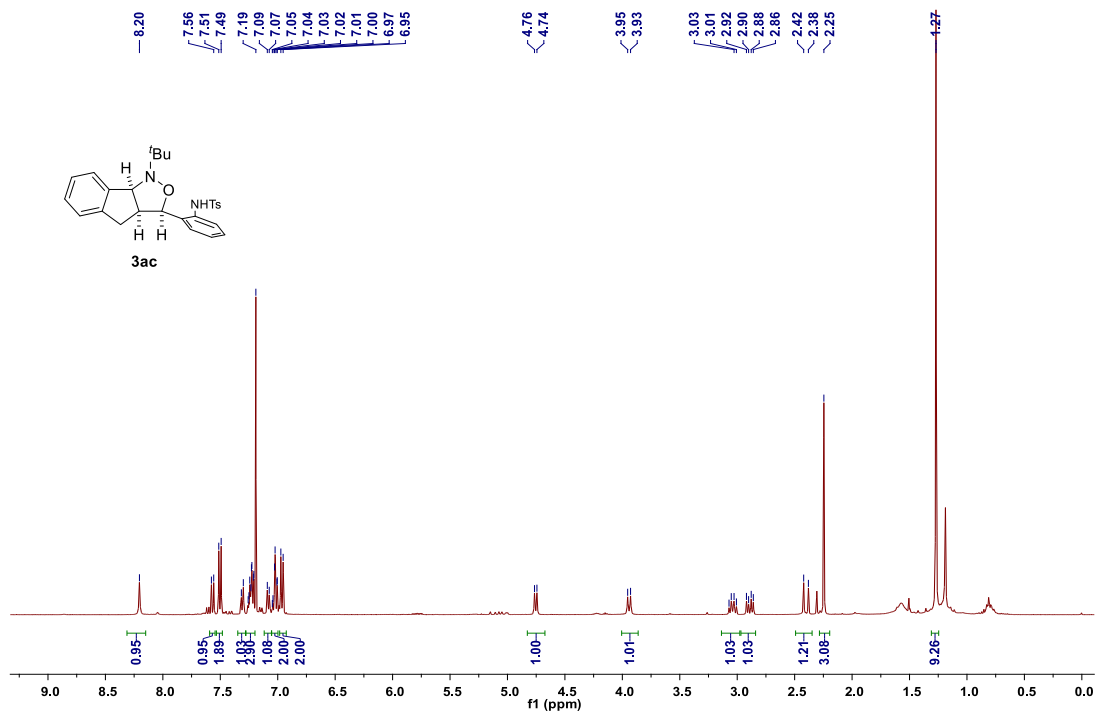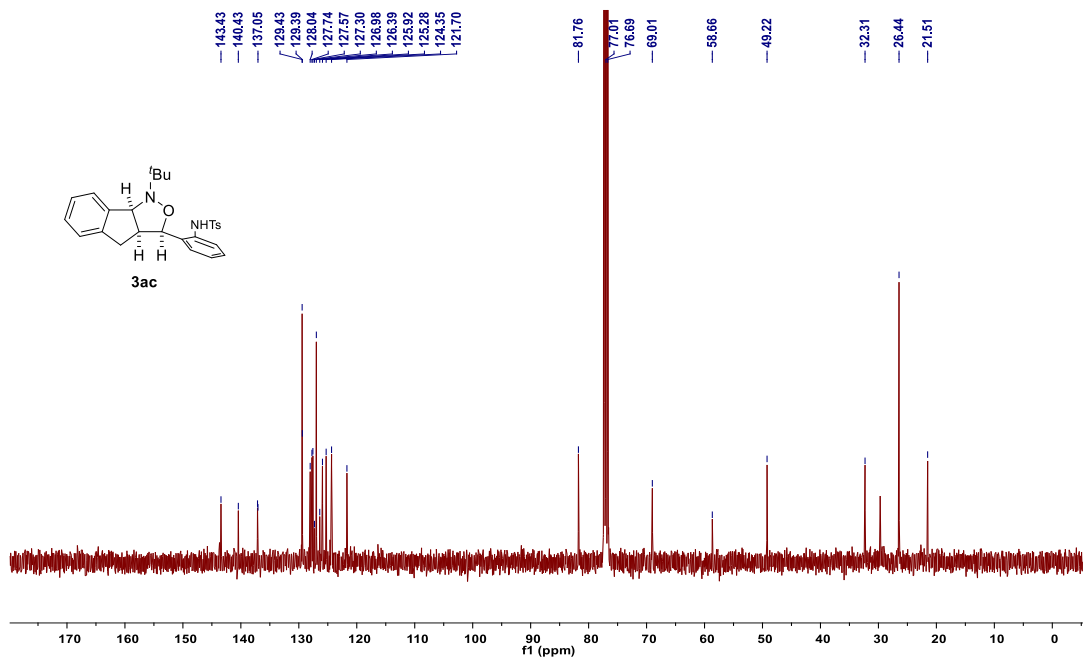

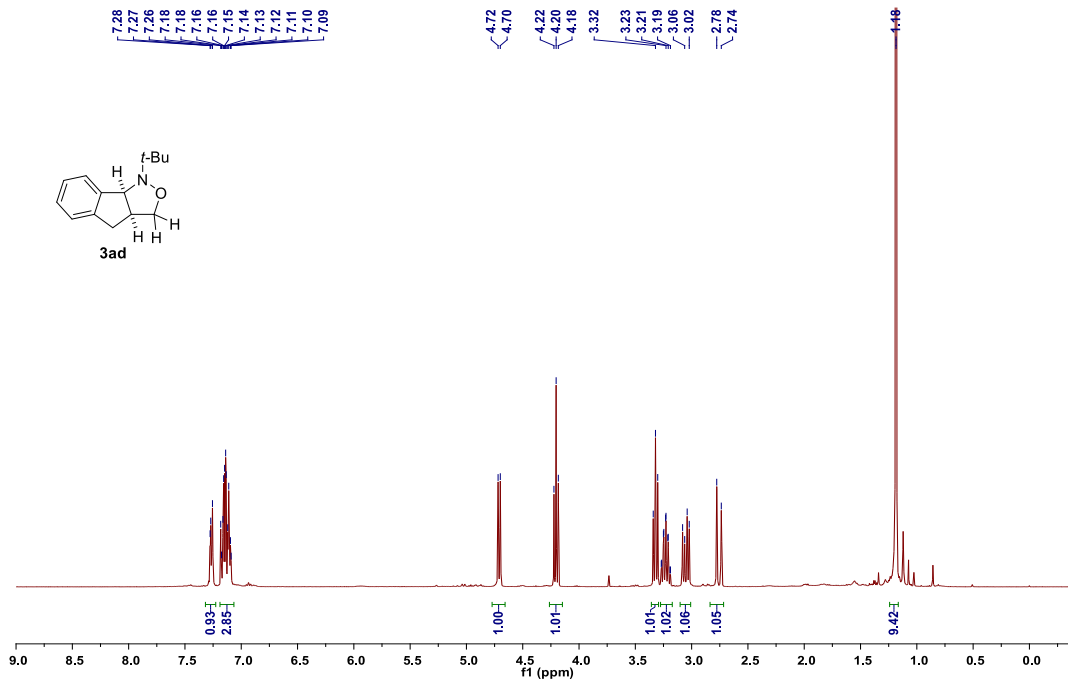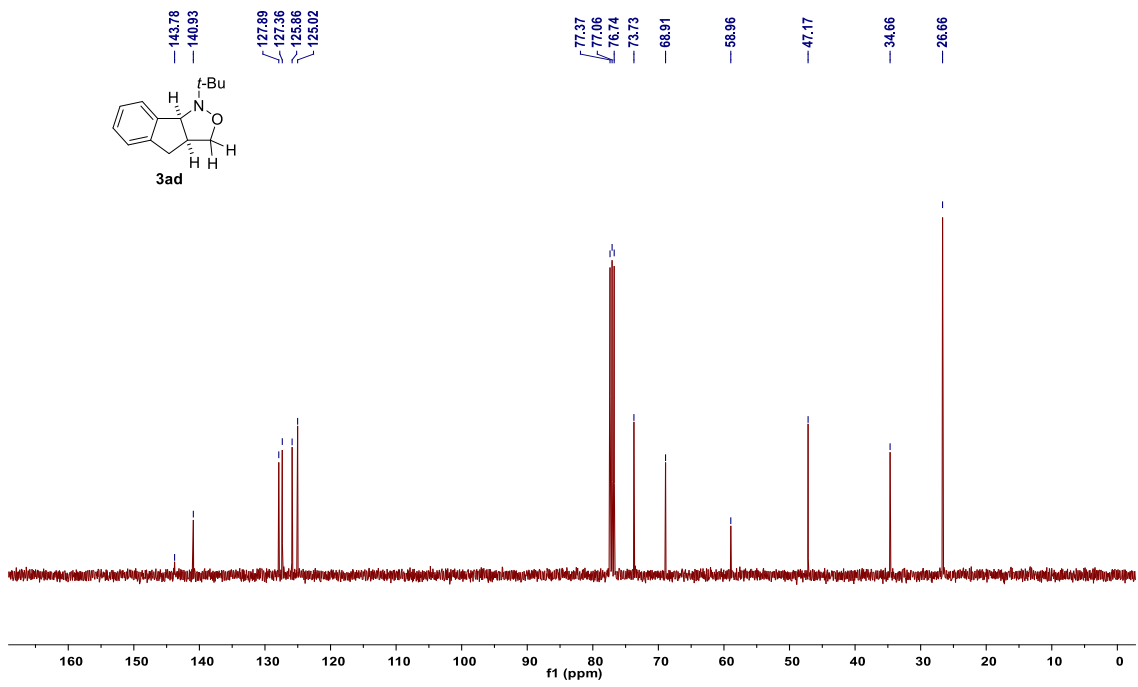

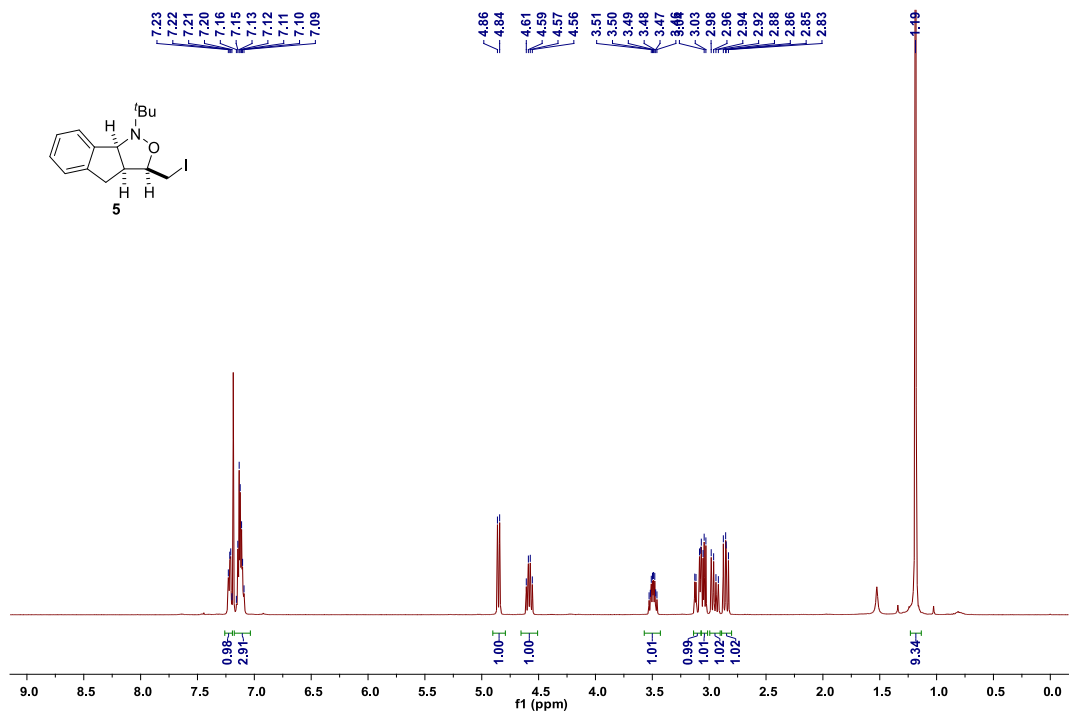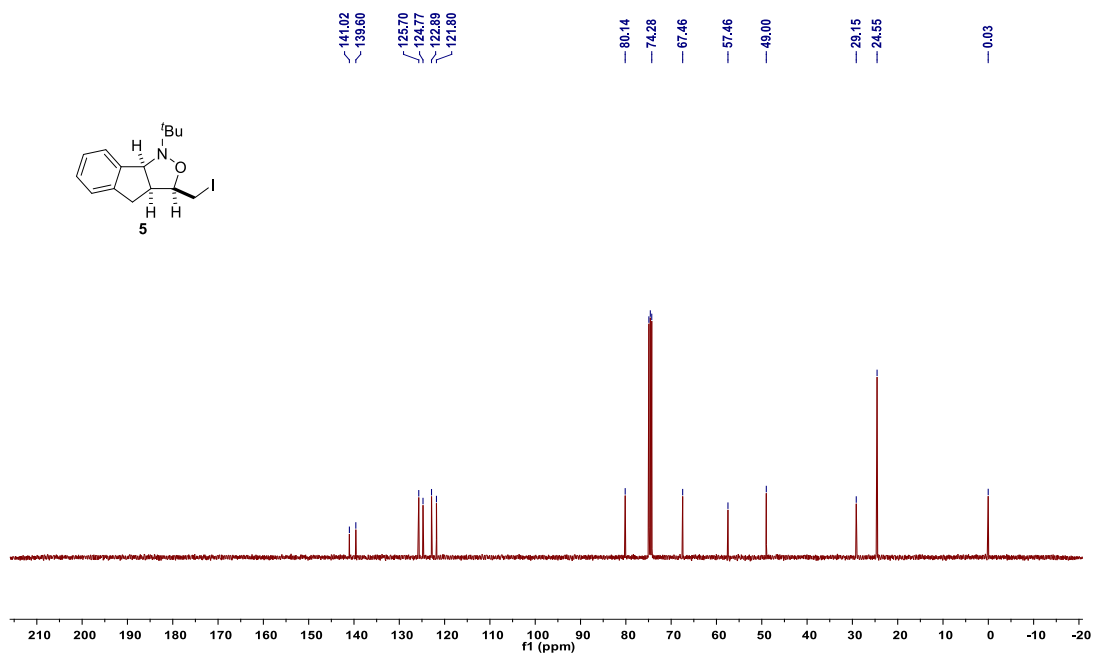

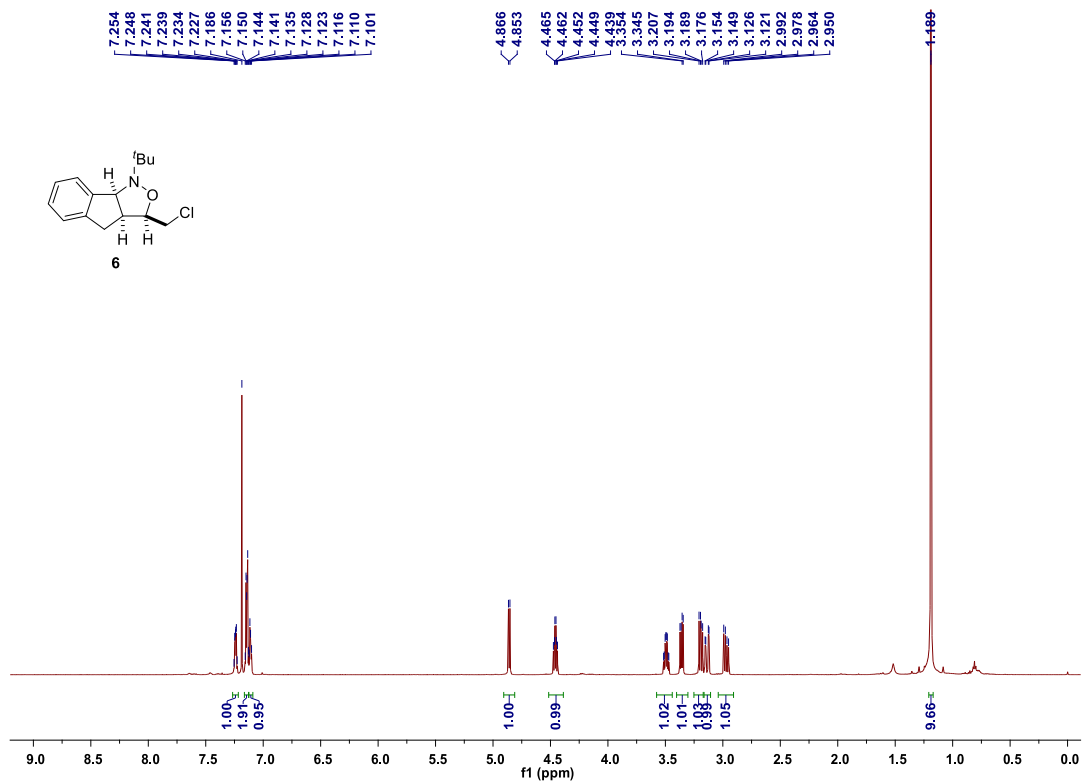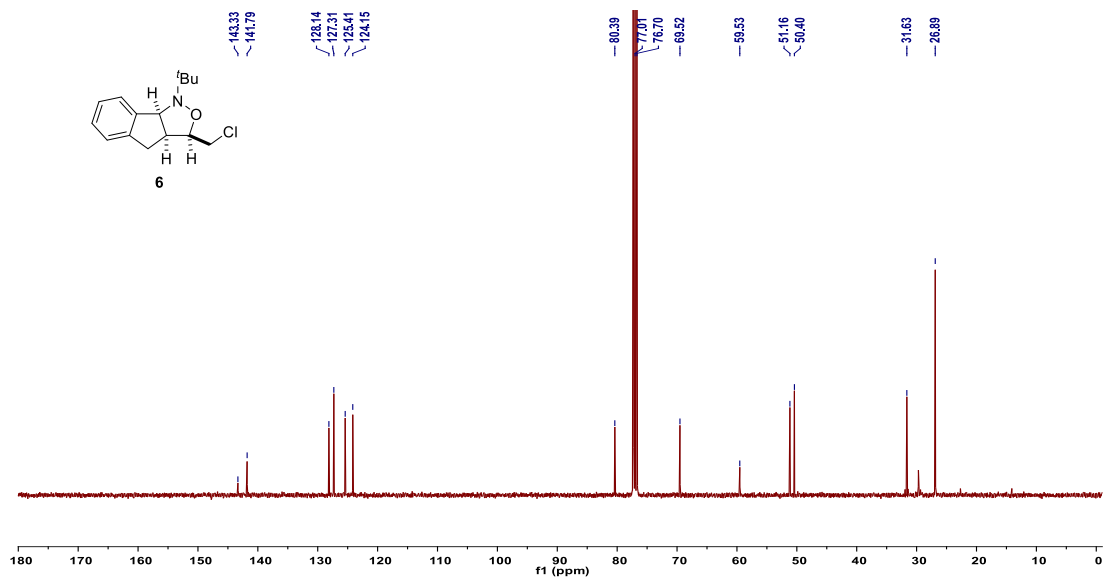

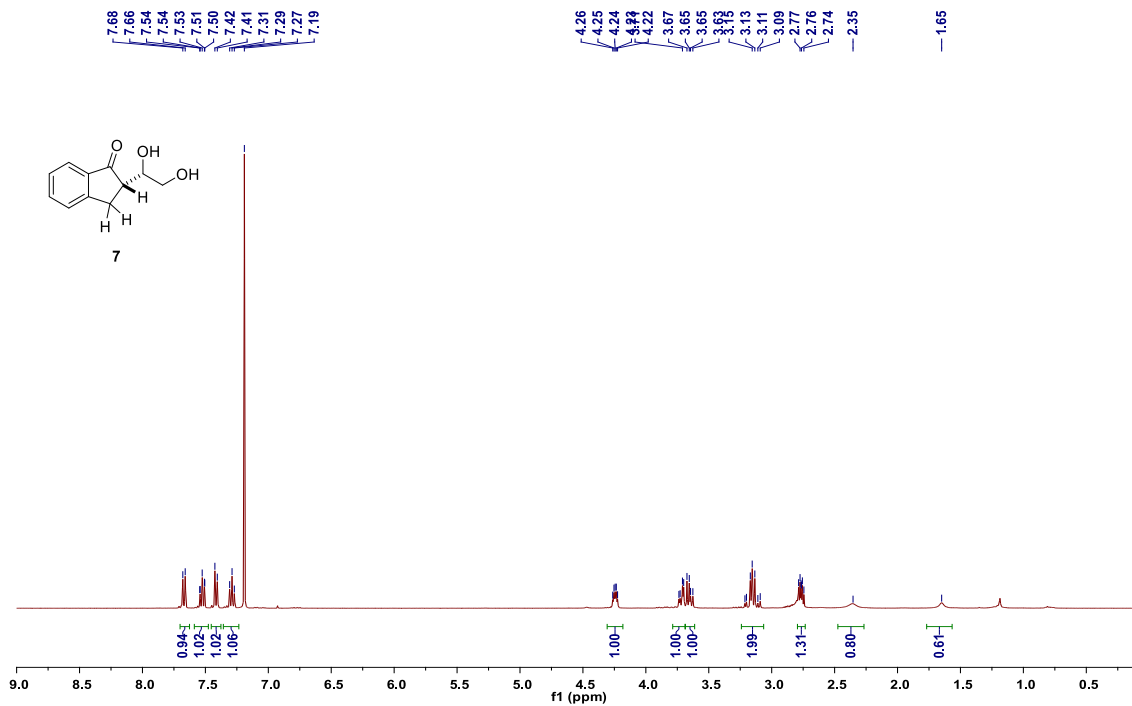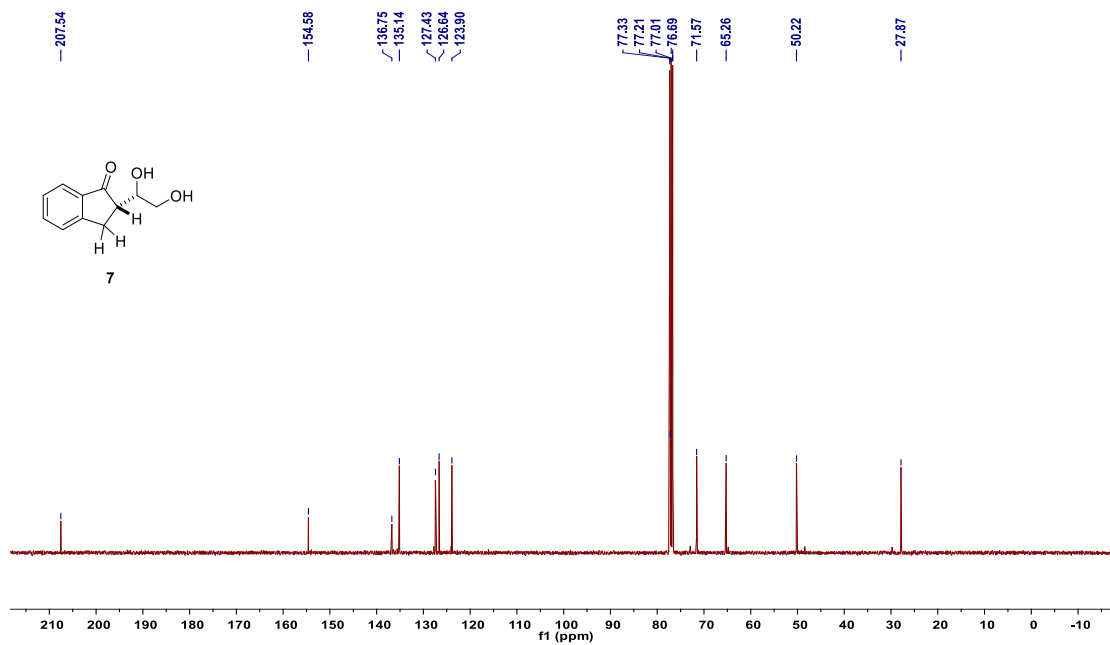

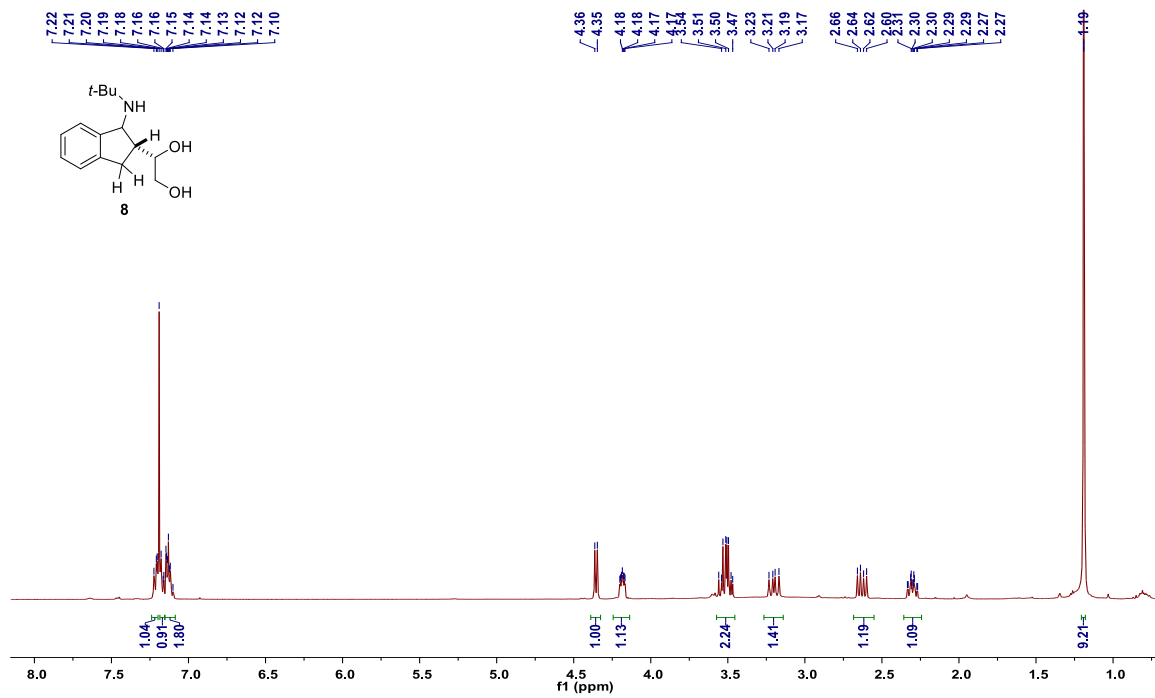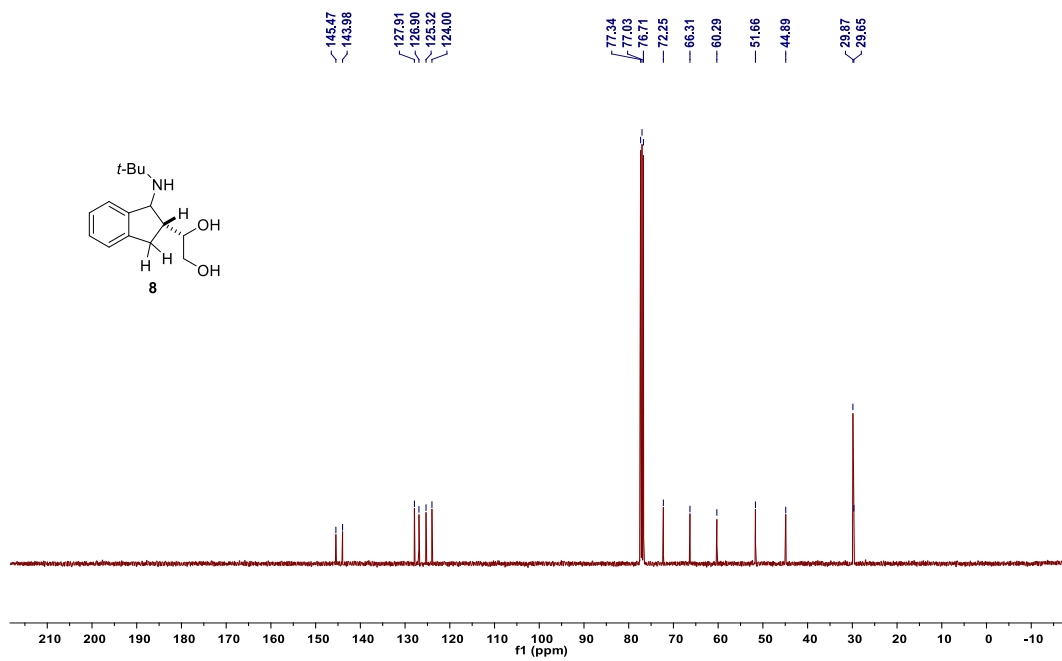

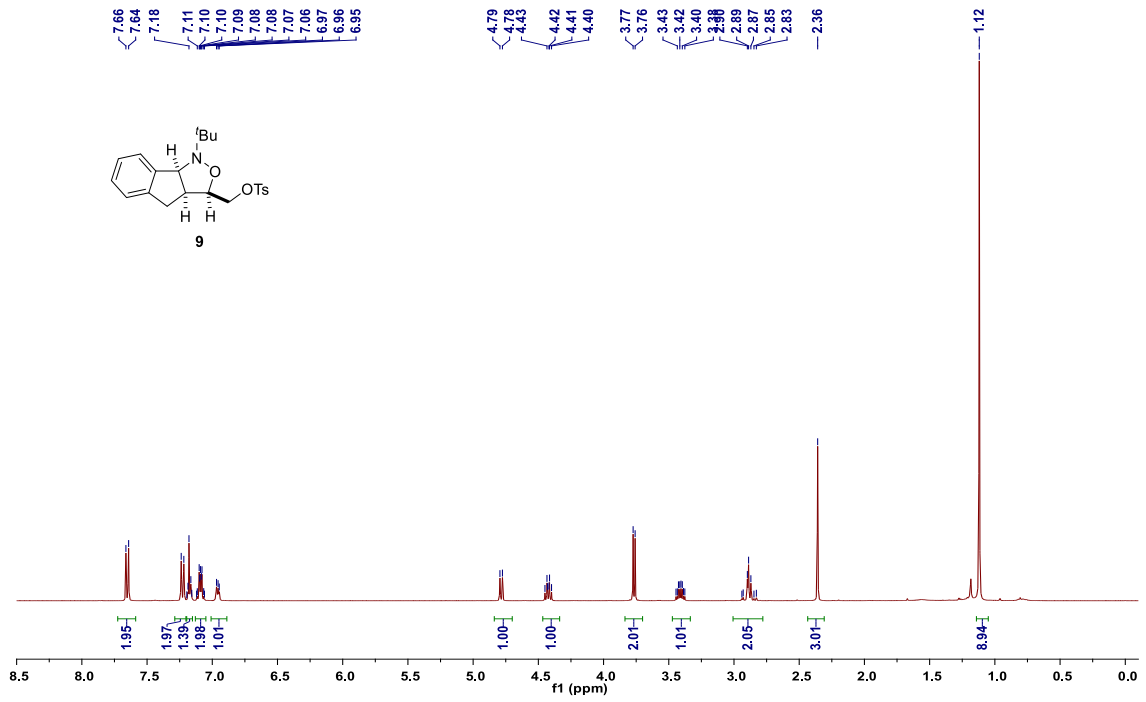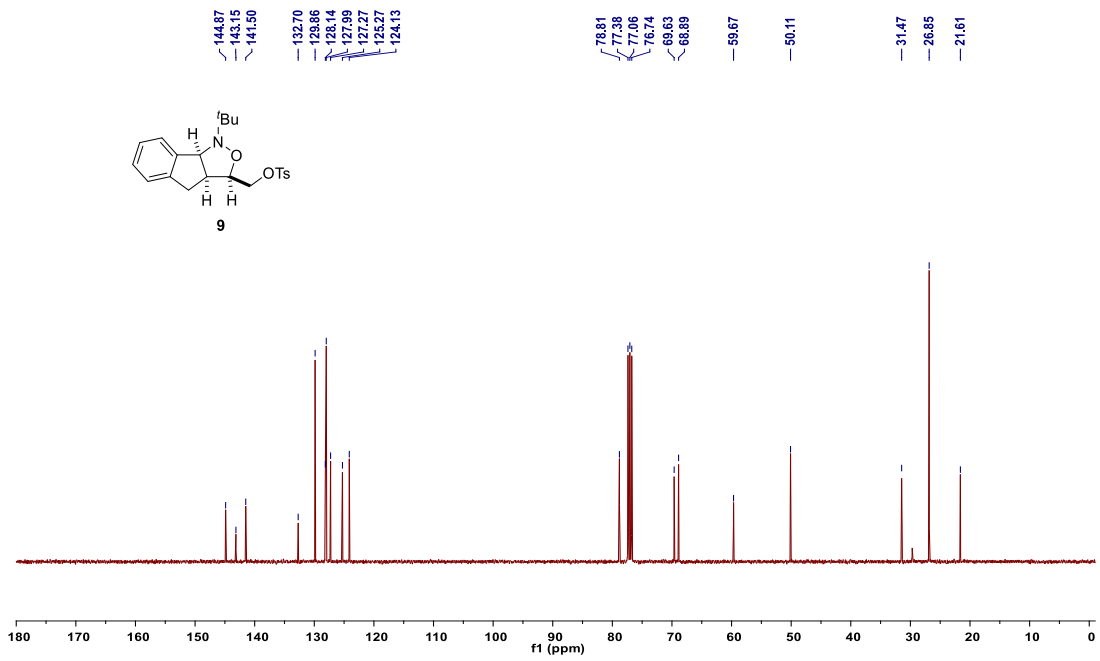



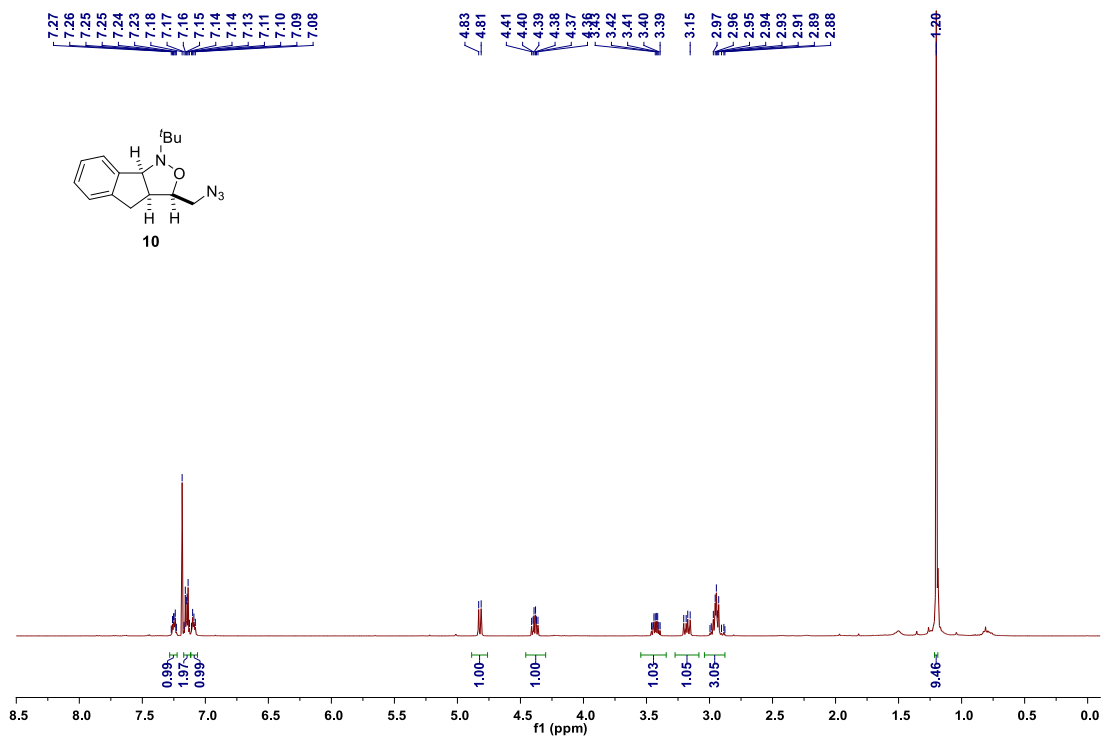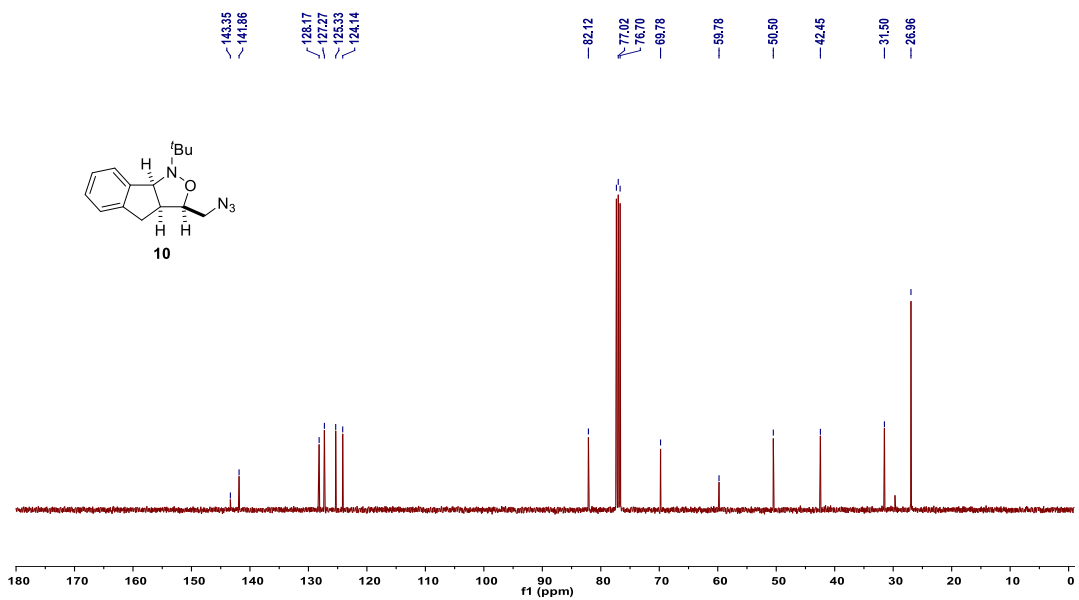

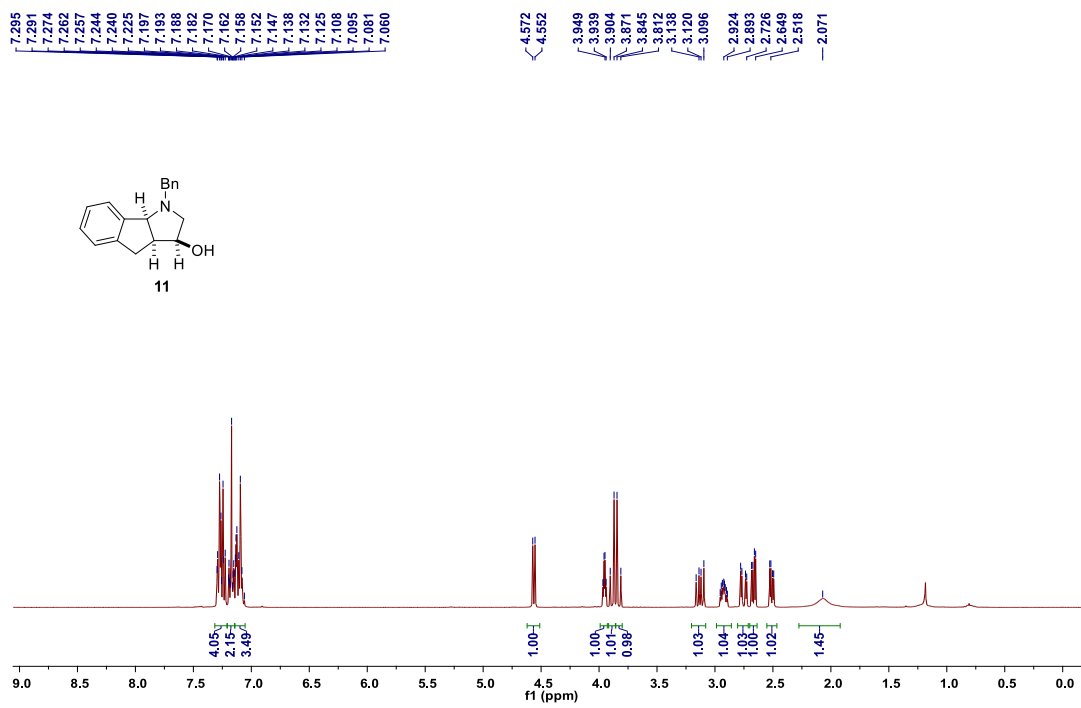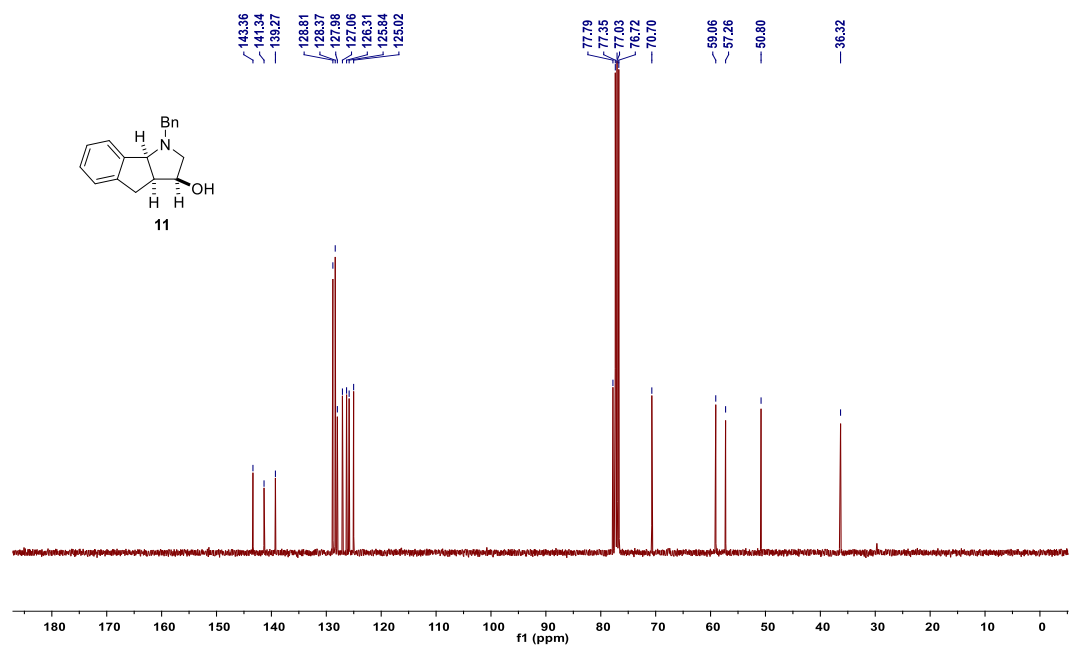

## Mass Spectrum SmartFormula Report

**Analysis Info**

Analysis Name G:\ZM MS\0412\_RB3\_01\_12730.d  
 Method LC\_NO UV\_P50-1500\_6MIN.m  
 Sample Name 0412

Acquisition D 2022-04-13 11:44:52

Operator Demo User  
 Instrument compact 8255754.2017  
 6

**Comment**
**Acquisition Paramet**

|             |            |               |          |                  |           |
|-------------|------------|---------------|----------|------------------|-----------|
| Source Type | ESI        | Ion Polarity  | Positive | Set Nebulizer    | 3.0 Bar   |
| Focus       | Not active | Set Capillary | 4000 V   | Set Dry Heater   | 200 °C    |
| Scan Begin  | 50 m/z     | Set End Plate | -500 V   | Set Dry Gas      | 8.0 l/min |
| Scan End    | 1500 m/z   | Off-charging  | 2000 V   | Set Divert Valve | Waste     |
|             |            | Voltage       | 0 nA     | Set APCI Heater  | 0 °C      |

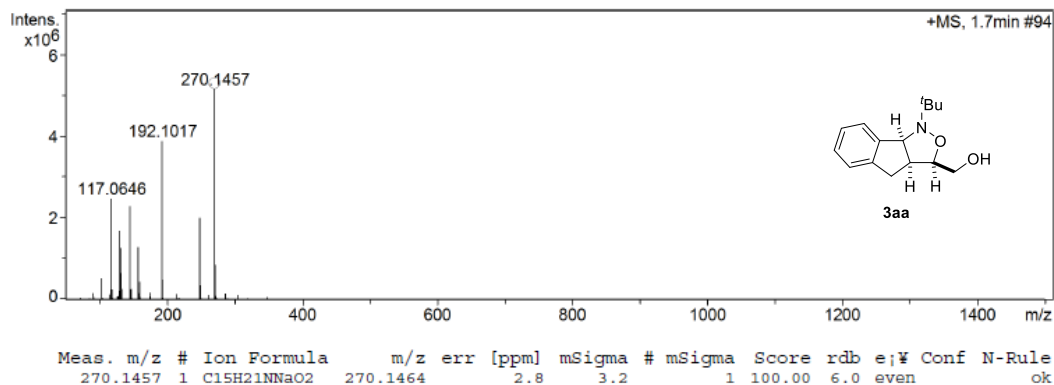

## Mass Spectrum SmartFormula Report

**Analysis Info**

Analysis Name G:\ZM MS\0617\_GA7\_01\_14488.d  
 Method LC\_NO UV\_P50-1500\_6MIN.m  
 Sample Name 0617

Acquisition D 2022-06-20 12:33:32

Operator Demo User  
 Instrument compact 8255754.2017  
 6

**Comment**
**Acquisition Paramet**

|             |            |               |          |                  |           |
|-------------|------------|---------------|----------|------------------|-----------|
| Source Type | ESI        | Ion Polarity  | Positive | Set Nebulizer    | 3.0 Bar   |
| Focus       | Not active | Set Capillary | 4000 V   | Set Dry Heater   | 50 °C     |
| Scan Begin  | 50 m/z     | Set End Plate | -500 V   | Set Dry Gas      | 4.0 l/min |
| Scan End    | 1500 m/z   | Off-charging  | 2000 V   | Set Divert Valve | Waste     |
|             |            | Voltage       | 0 nA     | Set APCI Heater  | 0 °C      |

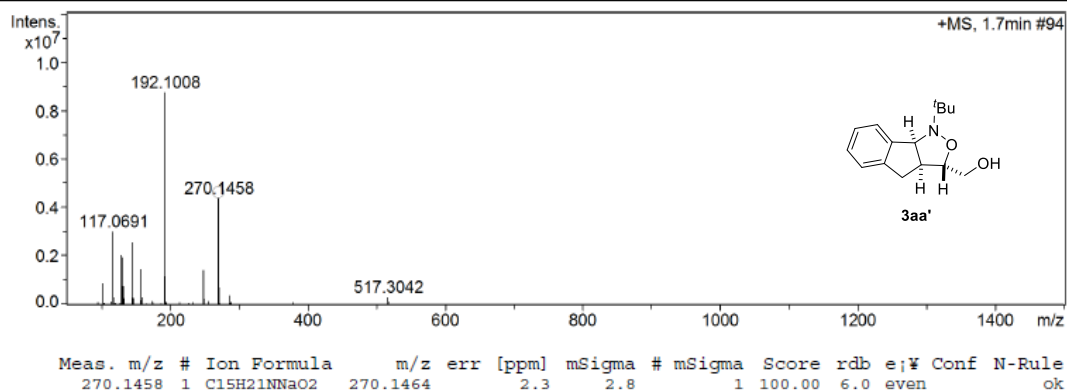

## Mass Spectrum SmartFormula Report

### Analysis Info

Analysis Name G:\ZM MS\0412\_RA8\_01\_12727.d  
Method LC\_NO UV\_P50-1500\_6MIN.m  
Sample Name 0412

Acquisition D 2022-04-13 11:21:46

Operator Demo User  
Instrument compact 8255754.2017  
6

### Comment

### Acquisition Paramet

|             |            |               |          |                  |           |
|-------------|------------|---------------|----------|------------------|-----------|
| Source Type | ESI        | Ion Polarity  | Positive | Set Nebulizer    | 3.0 Bar   |
| Focus       | Not active | Set Capillary | 4000 V   | Set Dry Heater   | 200 °C    |
| Scan Begin  | 50 m/z     | Set End Plate | -500 V   | Set Dry Gas      | 8.0 l/min |
| Scan End    | 1500 m/z   | Set Charging  | 2000 V   | Set Divert Valve | Waste     |
|             |            | Set Voltage   | 0 nA     | Set APCI Heater  | 0 °C      |

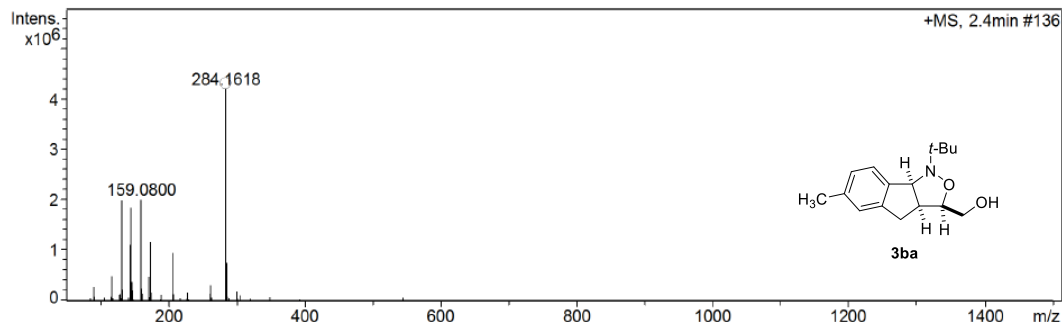

| Meas. m/z | # | Ion Formula                                       | m/z err [ppm] | mSigma | #   | mSigma | Score  | rdb | ej   | Conf | N-Rule |
|-----------|---|---------------------------------------------------|---------------|--------|-----|--------|--------|-----|------|------|--------|
| 284.1618  | 1 | C <sub>16</sub> H <sub>23</sub> NNaO <sub>2</sub> | 284.1621      | 1.0    | 1.3 | 1      | 100.00 | 6.0 | even |      | ok     |

## Mass Spectrum SmartFormula Report

### Analysis Info

Analysis Name G:\ZM MS\0412\_RA5\_01\_12715.d  
Method LC\_NO UV\_P50-1500\_6MIN.m  
Sample Name 0412

Acquisition D 2022-04-13 9:43:00

Operator Demo User  
Instrument compact 8255754.2017  
6

### Comment

### Acquisition Paramet

|             |            |               |          |                  |           |
|-------------|------------|---------------|----------|------------------|-----------|
| Source Type | ESI        | Ion Polarity  | Positive | Set Nebulizer    | 3.0 Bar   |
| Focus       | Not active | Set Capillary | 4000 V   | Set Dry Heater   | 200 °C    |
| Scan Begin  | 50 m/z     | Set End Plate | -500 V   | Set Dry Gas      | 8.0 l/min |
| Scan End    | 1500 m/z   | Set Charging  | 2000 V   | Set Divert Valve | Waste     |
|             |            | Set Voltage   | 0 nA     | Set APCI Heater  | 0 °C      |

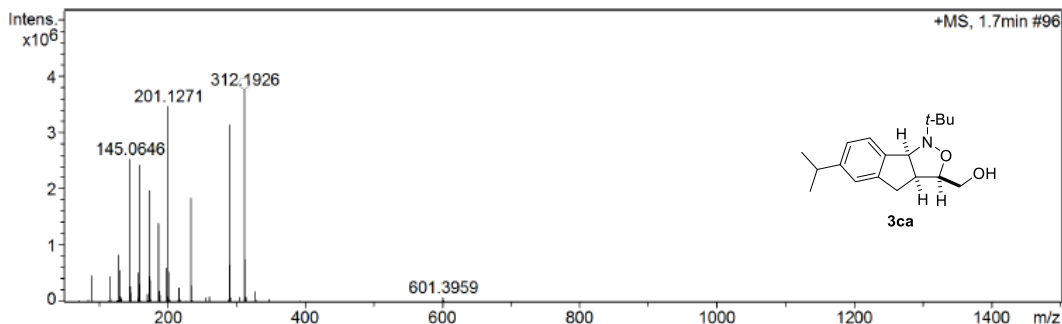

| Meas. m/z | # | Ion Formula                                       | m/z err [ppm] | mSigma | #   | mSigma | Score  | rdb | ej   | Conf | N-Rule |
|-----------|---|---------------------------------------------------|---------------|--------|-----|--------|--------|-----|------|------|--------|
| 312.1926  | 1 | C <sub>18</sub> H <sub>27</sub> NNaO <sub>2</sub> | 312.1934      | 2.7    | 1.1 | 1      | 100.00 | 6.0 | even |      | ok     |

## Mass Spectrum SmartFormula Report

**Analysis Info** Acquisition D 2022-04-13 9:50:52  
 Analysis Name G:\ZM MS\0412\_RA6\_01\_12716.d  
 Method LC\_NO UV\_P50-1500\_6MIN.m Operator Demo User  
 Sample Name 0412 Instrumen compact 8255754.2017  
6

Comment

### Acquisition Paramet

|             |            |                 |          |                  |           |
|-------------|------------|-----------------|----------|------------------|-----------|
| Source Type | ESI        | Ion Polarity    | Positive | Set Nebulizer    | 3.0 Bar   |
| Focus       | Not active | Set Capillary   | 4000 V   | Set Dry Heater   | 200 °C    |
| Scan Begin  | 50 m/z     | Set End Plate   | -500 V   | Set Dry Gas      | 8.0 l/min |
| Scan End    | 1500 m/z   | Offset charging | 2000 V   | Set Divert Valve | Waste     |
|             |            | Set Voltage     | 0 nA     | Set APCI Heater  | 0 °C      |

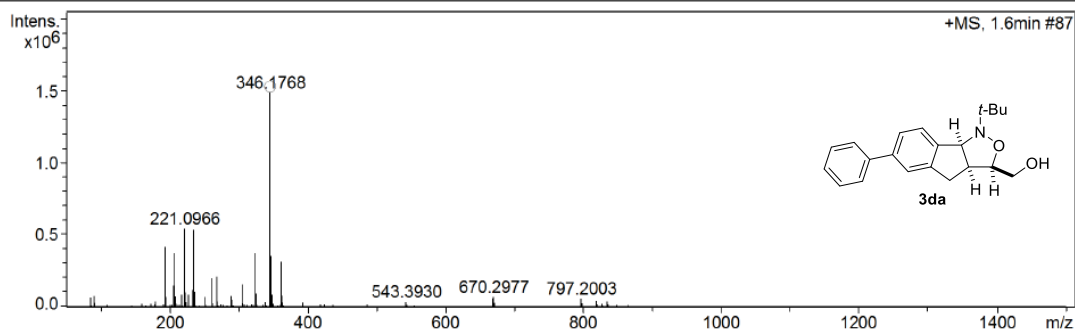

| Meas. m/z # | Ion Formula | m/z err [ppm] | mSigma # | mSigma | Score | rdb    | e;¥  | Conf | N-Rule |
|-------------|-------------|---------------|----------|--------|-------|--------|------|------|--------|
| 346.1768 1  | C21H25NNaO2 | 346.1777      | 2.7      | 2.3    | 1     | 100.00 | 10.0 | even | ok     |

## Mass Spectrum SmartFormula Report

**Analysis Info** Acquisition D 2022-04-13 11:53:01  
 Analysis Name G:\ZM MS\0412\_RB4\_01\_12731.d  
 Method LC\_NO UV\_P50-1500\_6MIN.m Operator Demo User  
 Sample Name 0412 Instrumen compact 8255754.2017  
6

Comment

### Acquisition Paramet

|             |            |                 |          |                  |           |
|-------------|------------|-----------------|----------|------------------|-----------|
| Source Type | ESI        | Ion Polarity    | Positive | Set Nebulizer    | 3.0 Bar   |
| Focus       | Not active | Set Capillary   | 4000 V   | Set Dry Heater   | 200 °C    |
| Scan Begin  | 50 m/z     | Set End Plate   | -500 V   | Set Dry Gas      | 8.0 l/min |
| Scan End    | 1500 m/z   | Offset charging | 2000 V   | Set Divert Valve | Waste     |
|             |            | Set Voltage     | 0 nA     | Set APCI Heater  | 0 °C      |

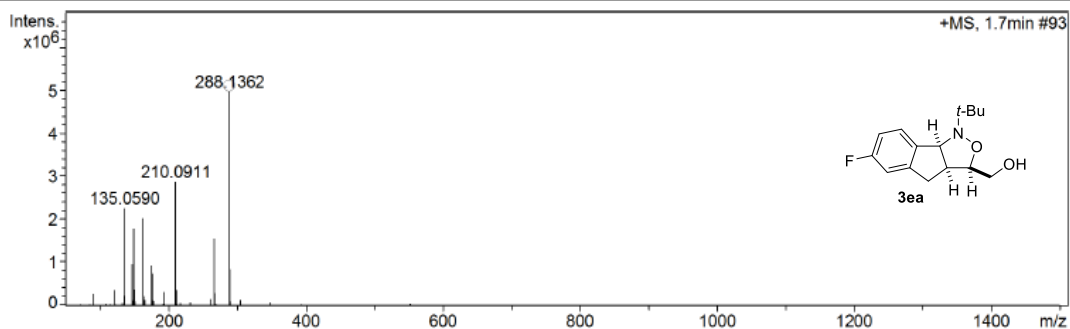

| Meas. m/z # | Ion Formula  | m/z err [ppm] | mSigma # | mSigma | Score | rdb    | e;¥ | Conf | N-Rule |
|-------------|--------------|---------------|----------|--------|-------|--------|-----|------|--------|
| 288.1362 1  | C15H20FNNaO2 | 288.1370      | 2.8      | 0.2    | 1     | 100.00 | 6.0 | even | ok     |

# Mass Spectrum SmartFormula Report

## Analysis Info

Analysis Name G:\ZM MS\0412\_RA4\_01\_12714.d  
 Method LC\_NO UV\_P50-1500\_6MIN.m  
 Sample Name 0412

Acquisition D 2022-04-13 9:35:39

Operator Demo User  
 Instrument compact 8255754.2017  
 6

## Comment

## Acquisition Paramet

|             |            |                |          |                  |           |
|-------------|------------|----------------|----------|------------------|-----------|
| Source Type | ESI        | Ion Polarity   | Positive | Set Nebulizer    | 3.0 Bar   |
| Focus       | Not active | Set Capillary  | 4000 V   | Set Dry Heater   | 200 °C    |
| Scan Begin  | 50 m/z     | Set End Plate  | -500 V   | Set Dry Gas      | 8.0 l/min |
| Scan End    | 1500 m/z   | Set SFC        | 2000 V   | Set Divert Valve | Waste     |
|             |            | Set Sheath Gas | 0 nA     | Set APCI Heater  | 0 °C      |

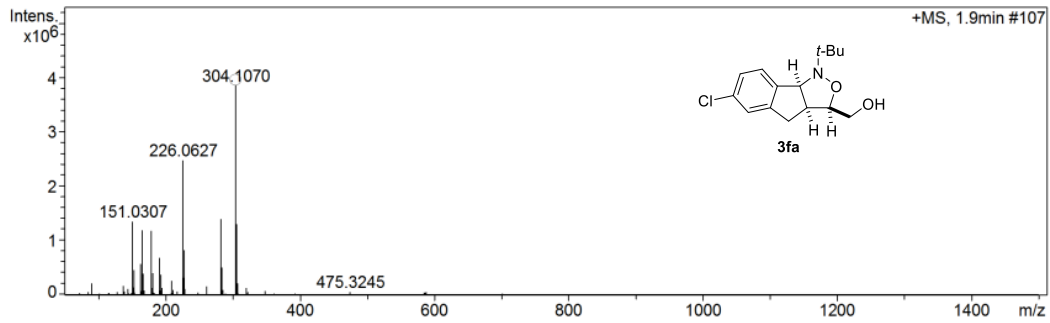

| Meas. m/z | # | Ion Formula   | m/z err [ppm] | mSigma | #   | mSigma | Score  | rdb | e    | Y | Conf | N-Rule |
|-----------|---|---------------|---------------|--------|-----|--------|--------|-----|------|---|------|--------|
| 304.1070  | 1 | C15H20ClNNaO2 | 304.1075      | 1.6    | 0.7 | 1      | 100.00 | 6.0 | even |   |      | ok     |

Identify Chemistry Process Callrate Annotation Method View Tools Compass Window Help

Chromatogram - 0412\_RA4\_01\_12714.d: BPC +All MS

Spectrum View - 0412\_RA4\_01\_12714.d

Compound Spectra - 0412\_RA4\_01\_12714.d

Spectrum Data

| #   | m/z      | Res.  | S/N    | I       | I %   | FWHM   |
|-----|----------|-------|--------|---------|-------|--------|
| 158 | 282.1250 | 11045 | 1649.0 | 1398313 | 36.3  | 0.0255 |
| 159 | 282.3366 | 6518  | 4.2    | 3557    | 0.1   | 0.0433 |
| 160 | 282.9049 | 11030 | 5.1    | 4334    | 0.1   | 0.0256 |
| 161 | 283.1286 | 11135 | 290.6  | 246452  | 6.4   | 0.0254 |
| 162 | 284.0199 | 8140  | 1.2    | 1921    | 0.0   | 0.0349 |
| 163 | 284.1227 | 10965 | 586.8  | 497637  | 12.9  | 0.0259 |
| 164 | 285.1260 | 10828 | 99.3   | 84188   | 2.2   | 0.0263 |
| 165 | 286.1287 | 11194 | 10.6   | 8904    | 0.2   | 0.0257 |
| 166 | 287.1292 | 11443 | 2.3    | 1932    | 0.1   | 0.0251 |
| 167 | 288.1337 | 11411 | 2.7    | 2229    | 0.1   | 0.0252 |
| 168 | 288.9230 | 10920 | 32.7   | 27707   | 0.7   | 0.0265 |
| 169 | 289.9259 | 10665 | 1.6    | 1370    | 0.0   | 0.0288 |
| 170 | 290.9248 | 13462 | 1.1    | 942     | 0.0   | 0.0216 |
| 171 | 292.1151 | 9309  | 2.9    | 2499    | 0.1   | 0.0214 |
| 172 | 292.9161 | 12924 | 1.1    | 967     | 0.0   | 0.0227 |
| 173 | 294.9391 | 11847 | 2.5    | 2149    | 0.1   | 0.0249 |
| 174 | 298.1443 | 9283  | 1.0    | 863     | 0.0   | 0.0218 |
| 175 | 300.9171 | 8618  | 2.0    | 1726    | 0.0   | 0.0349 |
| 176 | 301.0750 | 10400 | 6.4    | 5462    | 0.1   | 0.0289 |
| 177 | 301.1299 | 11772 | 1.4    | 1187    | 0.0   | 0.0256 |
| 178 | 302.0779 | 10010 | 1.3    | 1116    | 0.0   | 0.0302 |
| 179 | 302.6925 | 12242 | 3.1    | 2588    | 0.1   | 0.0247 |
| 180 | 303.1946 | 10119 | 1.7    | 1410    | 0.0   | 0.0300 |
| 181 | 303.7691 | 6072  | 1.1    | 922     | 0.0   | 0.0500 |
| 182 | 303.9264 | 5567  | 2.0    | 1711    | 0.0   | 0.0546 |
| 183 | 304.1070 | 11551 | 4539.6 | 3049560 | 100.0 | 0.0268 |
| 184 | 304.3265 | 8870  | 54.1   | 4586    | 1.2   | 0.0308 |
| 185 | 304.4083 | 9882  | 6.4    | 5469    | 0.1   | 0.0308 |
| 186 | 304.4783 | 7809  | 4.8    | 4845    | 0.1   | 0.0290 |
| 187 | 304.5324 | 8641  | 14.6   | 12398   | 0.3   | 0.0352 |
| 188 | 304.7057 | 8666  | 1.6    | 1376    | 0.0   | 0.0352 |
| 189 | 304.8966 | 8955  | 2.6    | 2229    | 0.1   | 0.0340 |
| 190 | 305.1104 | 11177 | 773.0  | 655971  | 17.0  | 0.0272 |
| 191 | 305.8141 | 7281  | 3.1    | 3641    | 0.1   | 0.0420 |
| 192 | 306.1044 | 11167 | 1531.8 | 1299978 | 33.7  | 0.0274 |
| 193 | 306.3276 | 10855 | 5.8    | 4906    | 0.1   | 0.0281 |
| 194 | 307.1077 | 11069 | 253.0  | 214574  | 5.6   | 0.0277 |
| 195 | 308.1117 | 10165 | 25.0   | 21194   | 0.6   | 0.0303 |
| 196 | 309.1180 | 8146  | 2.5    | 2078    | 0.1   | 0.0379 |
| 197 | 310.0147 | 11263 | 4.3    | 3622    | 0.1   | 0.0275 |
| 198 | 312.0128 | 10549 | 1.5    | 1242    | 0.0   | 0.0296 |
| 199 | 318.2977 | 13127 | 1.4    | 1219    | 0.0   | 0.0242 |
| 200 | 320.0813 | 11260 | 146.5  | 124223  | 3.2   | 0.0284 |
| 201 | 321.0857 | 10857 | 23.8   | 20169   | 0.5   | 0.0296 |
| 202 | 322.0793 | 10866 | 56.4   | 47807   | 1.2   | 0.0296 |
| 203 | 322.1771 | 9869  | 2.9    | 2421    | 0.1   | 0.0326 |
| 204 | 323.0823 | 11109 | 10.1   | 8998    | 0.2   | 0.0291 |
| 205 | 324.0812 | 8071  | 4.5    | 3788    | 0.1   | 0.0402 |
| 206 | 326.1269 | 11446 | 1.1    | 905     | 0.0   | 0.0285 |
| 207 | 326.1963 | 10501 | 5.8    | 4952    | 0.1   | 0.0320 |
| 208 | 327.1973 | 12822 | 1.7    | 1409    | 0.0   | 0.0263 |
| 209 | 328.0847 | 9630  | 1.8    | 1566    | 0.0   | 0.0351 |
| 210 | 340.2641 | 6588  | 2.2    | 1844    | 0.0   | 0.0516 |
| 211 | 344.8766 | 12465 | 1.4    | 1209    | 0.0   | 0.0276 |
| 212 | 347.1190 | 17666 | 2.0    | 1707    | 0.0   | 0.0273 |

ljkuku HPC Calibration

## Mass Spectrum SmartFormula Report

**Analysis Info** Acquisition D 2022-04-13 12:55:51  
 Analysis Name G:\ZM MS\0412\_RC4\_01\_12739.d  
 Method LC\_NO UV\_P50-1500\_6MIN.m Operator Demo User  
 Sample Name 0412 Instrument compact 8255754.2017  
6

Comment

| Acquisition Paramet |            |                      |           |
|---------------------|------------|----------------------|-----------|
| Source Type         | ESI        | Ion Polarity         | Positive  |
| Focus               | Not active | Set Capillary        | 4000 V    |
| Scan Begin          | 50 m/z     | Set End Plate        | -500 V    |
| Scan End            | 1500 m/z   | Set Charging Voltage | 2000 V    |
|                     |            | Set Nebulizer        | 3.0 Bar   |
|                     |            | Set Dry Heater       | 200 °C    |
|                     |            | Set Dry Gas          | 8.0 l/min |
|                     |            | Set Divert Valve     | Waste     |
|                     |            | Set APCI Heater      | 0 °C      |

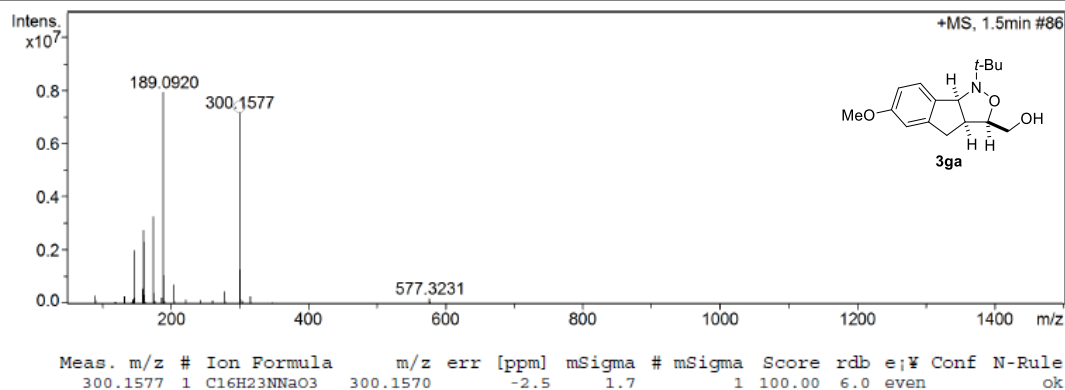

## Mass Spectrum SmartFormula Report

**Analysis Info** Acquisition D 2022-04-13 12:24:01  
 Analysis Name G:\ZM MS\0412\_RB8\_01\_12735.d  
 Method LC\_NO UV\_P50-1500\_6MIN.m Operator Demo User  
 Sample Name 0412 Instrument compact 8255754.2017  
6

Comment

| Acquisition Paramet |            |                      |           |
|---------------------|------------|----------------------|-----------|
| Source Type         | ESI        | Ion Polarity         | Positive  |
| Focus               | Not active | Set Capillary        | 4000 V    |
| Scan Begin          | 50 m/z     | Set End Plate        | -500 V    |
| Scan End            | 1500 m/z   | Set Charging Voltage | 2000 V    |
|                     |            | Set Nebulizer        | 3.0 Bar   |
|                     |            | Set Dry Heater       | 200 °C    |
|                     |            | Set Dry Gas          | 8.0 l/min |
|                     |            | Set Divert Valve     | Waste     |
|                     |            | Set APCI Heater      | 0 °C      |

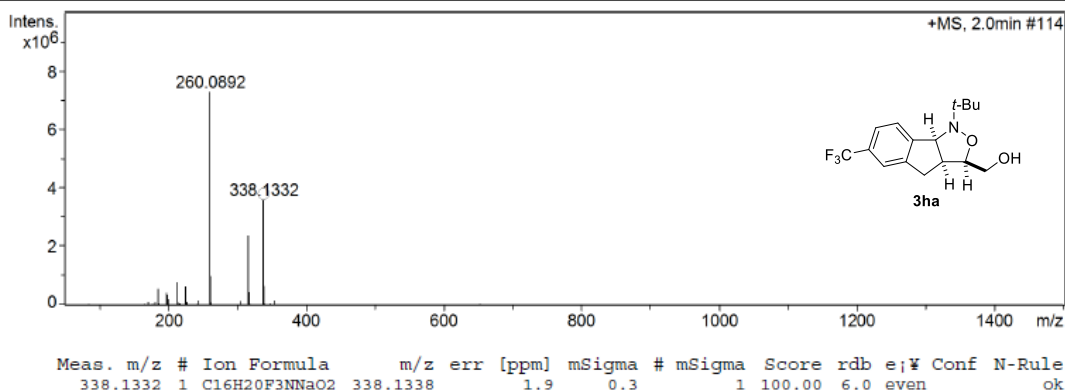

## Mass Spectrum SmartFormula Report

**Analysis Info** Acquisition D 2022-04-13 11:36:44  
 Analysis Name G: \ZM MS\0412\_RB2\_01\_12729.d  
 Method LC\_NO UV\_P50-1500\_6MIN.m Operator Demo User  
 Sample Name 0412 Instrument compact 8255754.2017  
6

**Acquisition Paramet**  
 Source Type ESI Ion Polarity Positive Set Nebulizer 3.0 Bar  
 Focus Not active Set Capillary 4000 V Set Dry Heater 200 °C  
 Scan Begin 50 m/z Set End Plate -500 V Set Dry Gas 8.0 l/min  
 Scan End 1500 m/z Set Charging 2000 V Set Divert Valve Waste  
Set Argon 0 nA Set APCI Heater 0 °C

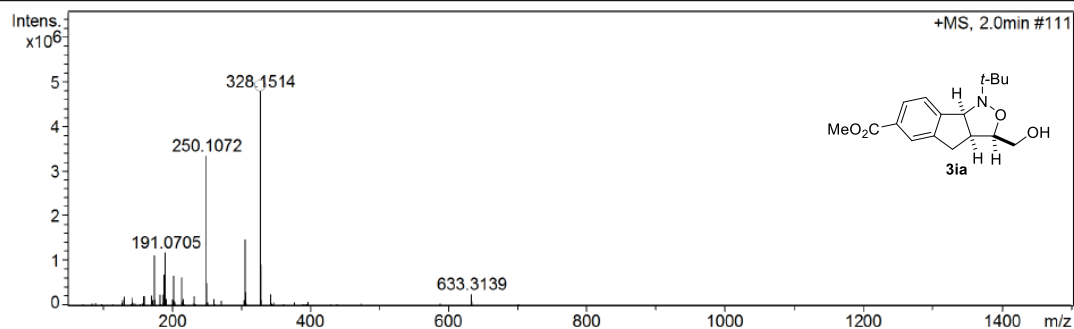

| Meas. m/z | # | Ion Formula | m/z      | err [ppm] | mSigma | # | mSigma | Score | rdb  | e | ¶ | Conf | N-Rule |
|-----------|---|-------------|----------|-----------|--------|---|--------|-------|------|---|---|------|--------|
| 328.1514  | 1 | C17H23NNaO4 | 328.1519 | 1.7       | 0.2    | 1 | 100.00 | 7.0   | even |   |   | ok   |        |

## Mass Spectrum SmartFormula Report

**Analysis Info** Acquisition D 2022-04-13 12:39:30  
 Analysis Name G: \ZM MS\0412\_RC2\_01\_12737.d  
 Method LC\_NO UV\_P50-1500\_6MIN.m Operator Demo User  
 Sample Name 0412 Instrument compact 8255754.2017  
6

**Acquisition Paramet**  
 Source Type ESI Ion Polarity Positive Set Nebulizer 3.0 Bar  
 Focus Not active Set Capillary 4000 V Set Dry Heater 200 °C  
 Scan Begin 50 m/z Set End Plate -500 V Set Dry Gas 8.0 l/min  
 Scan End 1500 m/z Set Charging 2000 V Set Divert Valve Waste  
Set Argon 0 nA Set APCI Heater 0 °C

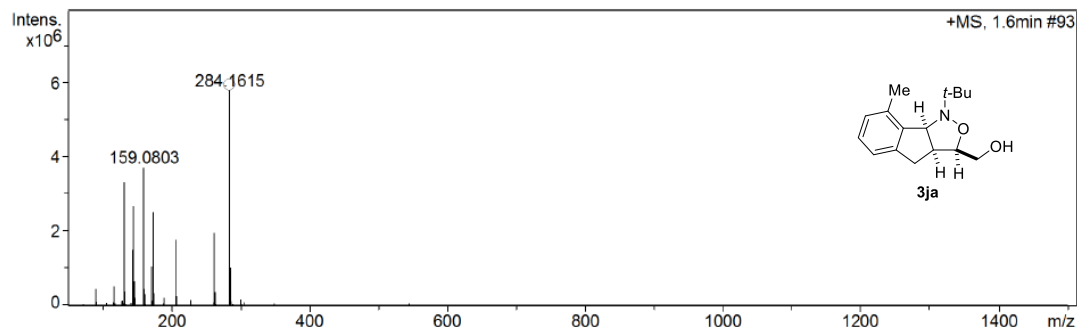

| Meas. m/z | # | Ion Formula | m/z      | err [ppm] | mSigma | # | mSigma | Score | rdb  | e | ¶ | Conf | N-Rule |
|-----------|---|-------------|----------|-----------|--------|---|--------|-------|------|---|---|------|--------|
| 284.1615  | 1 | C16H23NNaO2 | 284.1621 | 2.1       | 2.0    | 1 | 100.00 | 6.0   | even |   |   | ok   |        |



# Mass Spectrum SmartFormula Report

## Analysis Info

Analysis Name G:\ZM MS\0412\_RB1\_01\_12728.d  
 Method LC\_NO UV\_P50-1500\_6MIN.m  
 Sample Name 0412

Acquisition D 2022-04-13 11:29:23

Operator Demo User  
 Instrument compact 8255754.2017  
 6

## Comment

## Acquisition Paramet

|             |            |                 |          |                  |           |
|-------------|------------|-----------------|----------|------------------|-----------|
| Source Type | ESI        | Ion Polarity    | Positive | Set Nebulizer    | 3.0 Bar   |
| Focus       | Not active | Set Capillary   | 4000 V   | Set Dry Heater   | 200 °C    |
| Scan Begin  | 50 m/z     | Set End Plate   | -500 V   | Set Dry Gas      | 8.0 l/min |
| Scan End    | 1500 m/z   | Offset charging | 2000 V   | Set Divert Valve | Waste     |
|             |            | Veitagona       | 0 nA     | Set APCI Heater  | 0 °C      |

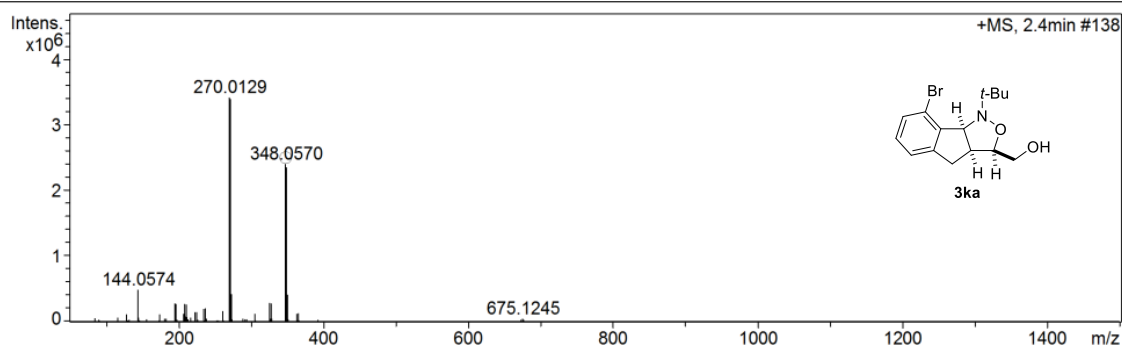

| Meas. m/z | # | Ion Formula   | m/z err [ppm] | mSigma | #   | mSigma | Score  | rdb | e;Y  | Conf | N-Rule |
|-----------|---|---------------|---------------|--------|-----|--------|--------|-----|------|------|--------|
| 348.0570  | 1 | C15H20BrNNaO2 | 348.0570      | -0.1   | 6.1 | 1      | 100.00 | 6.0 | even |      | ok     |

Identify Chemistry Process Calibrate Annotation Method View Tools Cgmpass Window Help

---

Chromatogram - 0412\_RB1\_01\_12728.d: BPC +All MS

Spectrum Data

| #        | m/z   | Res.   | S/N     | I    | I %    | FW |
|----------|-------|--------|---------|------|--------|----|
| 314.1219 | 9828  | 2.0    | 1708    | 0.1  | 0.0320 |    |
| 316.0196 | 10664 | 1.7    | 1458    | 0.0  | 0.0296 |    |
| 320.1604 | 9378  | 1.7    | 1417    | 0.0  | 0.0341 |    |
| 321.1233 | 10558 | 8.5    | 7233    | 0.2  | 0.0304 |    |
| 322.1286 | 10102 | 1.4    | 1170    | 0.0  | 0.0319 |    |
| 322.1791 | 11880 | 11.0   | 9370    | 0.3  | 0.0271 |    |
| 323.1822 | 9910  | 2.2    | 1882    | 0.1  | 0.0326 |    |
| 326.0753 | 11433 | 332.6  | 28265   | 8.3  | 0.0285 |    |
| 327.0791 | 10996 | 53.5   | 45335   | 1.3  | 0.0297 |    |
| 328.0735 | 11562 | 330.8  | 280518  | 8.2  | 0.0289 |    |
| 329.0771 | 11096 | 53.6   | 45981   | 1.3  | 0.0297 |    |
| 330.0804 | 10743 | 5.9    | 5005    | 0.1  | 0.0307 |    |
| 331.2163 | 11541 | 1.1    | 964     | 0.0  | 0.0287 |    |
| 332.0862 | 11470 | 1.7    | 1424    | 0.0  | 0.0290 |    |
| 334.0791 | 10578 | 1.3    | 1111    | 0.0  | 0.0316 |    |
| 336.1963 | 11492 | 11.1   | 9421    | 0.3  | 0.0293 |    |
| 337.1590 | 10741 | 2.4    | 2048    | 0.1  | 0.0314 |    |
| 338.1674 | 10844 | 1.6    | 1331    | 0.0  | 0.0312 |    |
| 339.1317 | 11624 | 1.3    | 1139    | 0.0  | 0.0292 |    |
| 344.8769 | 10197 | 3.2    | 2686    | 0.1  | 0.0338 |    |
| 347.8155 | 5212  | 11.0   | 864     | 0.0  | 0.0667 |    |
| 348.0570 | 11432 | 2830.4 | 2400159 | 70.3 | 0.0304 |    |
| 348.2132 | 6669  | 3.9    | 3331    | 0.1  | 0.0522 |    |
| 348.2942 | 10721 | 18.1   | 15371   | 0.5  | 0.0325 |    |
| 348.5145 | 7718  | 2.3    | 1946    | 0.1  | 0.0452 |    |
| 349.0602 | 11301 | 483.2  | 409771  | 12.0 | 0.0309 |    |
| 349.1846 | 11451 | 71.9   | 61008   | 1.8  | 0.0305 |    |
| 349.7981 | 6954  | 1.3    | 1315    | 0.0  | 0.0503 |    |
| 349.8847 | 6625  | 1.5    | 1233    | 0.0  | 0.0528 |    |
| 350.0552 | 11297 | 2768.6 | 2347756 | 68.7 | 0.0310 |    |
| 350.2077 | 7335  | 18.9   | 16049   | 0.5  | 0.0465 |    |
| 350.2931 | 7583  | 11.6   | 9851    | 0.3  | 0.0462 |    |
| 350.4508 | 7971  | 1.3    | 1137    | 0.0  | 0.0440 |    |
| 350.5139 | 8035  | 2.5    | 2081    | 0.1  | 0.0438 |    |
| 350.8994 | 10920 | 20.1   | 17082   | 0.5  | 0.0321 |    |
| 351.0584 | 11515 | 486.5  | 412573  | 12.1 | 0.0305 |    |
| 351.2085 | 7066  | 5.3    | 4471    | 0.1  | 0.0497 |    |
| 351.8970 | 7370  | 1.2    | 998     | 0.0  | 0.0465 |    |
| 352.0620 | 11371 | 46.6   | 39533   | 1.2  | 0.0310 |    |
| 352.8991 | 9099  | 1.1    | 945     | 0.0  | 0.0388 |    |
| 353.0833 | 10114 | 4.0    | 3400    | 0.1  | 0.0349 |    |
| 353.9668 | 11778 | 1.2    | 1006    | 0.0  | 0.0301 |    |
| 354.8872 | 8070  | 1.1    | 916     | 0.0  | 0.0440 |    |
| 356.9102 | 10322 | 6.5    | 5552    | 0.2  | 0.0349 |    |
| 360.3208 | 10484 | 2.4    | 2048    | 0.1  | 0.0346 |    |
| 362.9239 | 9153  | 3.3    | 2807    | 0.1  | 0.0397 |    |
| 364.0313 | 11719 | 142.4  | 120725  | 3.5  | 0.0311 |    |
| 365.0350 | 11031 | 22.4   | 19028   | 0.6  | 0.0331 |    |
| 365.1551 | 11513 | 3.2    | 2699    | 0.1  | 0.0317 |    |
| 366.0297 | 11476 | 147.3  | 124934  | 3.7  | 0.0319 |    |
| 367.0329 | 10635 | 22.9   | 19428   | 0.6  | 0.0345 |    |
| 368.0295 | 11531 | 15.1   | 11100   | 0.3  | 0.0316 |    |
| 369.0308 | 12696 | 2.0    | 1738    | 0.1  | 0.0291 |    |
| 371.8664 | 11441 | 1.3    | 1147    | 0.0  | 0.0337 |    |

Compound Spectra - 0412\_RB1\_01\_12728.d

Display threshold: 100  
 Mass List / SmartFormula /

## Mass Spectrum SmartFormula Report

**Analysis Info**

Analysis Name G:\ZM MS\0412\_RC6\_01\_12741.d  
 Method LC\_NO UV\_P50-1500\_6MIN.m  
 Sample Name 0412

Acquisition D 2022-04-13 13:11:47

Operator Demo User  
 Instrument compact 8255754.2017  
 6

**Comment**

**Acquisition Paramet**

|             |            |               |          |                  |           |
|-------------|------------|---------------|----------|------------------|-----------|
| Source Type | ESI        | Ion Polarity  | Positive | Set Nebulizer    | 3.0 Bar   |
| Focus       | Not active | Set Capillary | 4000 V   | Set Dry Heater   | 200 °C    |
| Scan Begin  | 50 m/z     | Set End Plate | -500 V   | Set Dry Gas      | 8.0 l/min |
| Scan End    | 1500 m/z   | Set Charging  | 2000 V   | Set Divert Valve | Waste     |
|             |            | Set Voltage   | 0 nA     | Set APCI Heater  | 0 °C      |

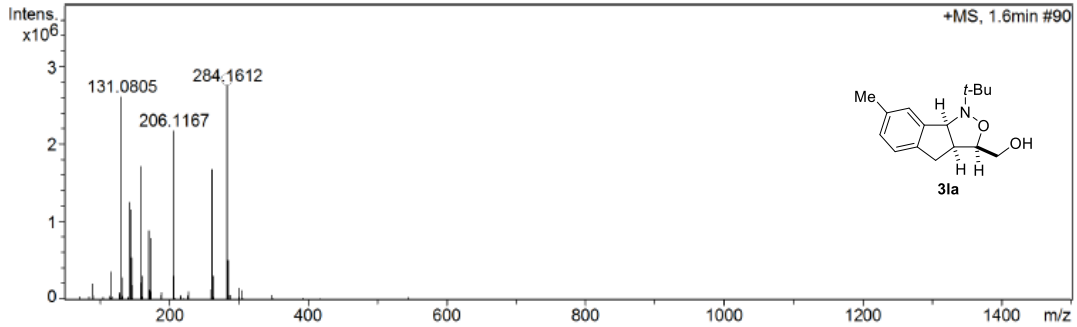

| Meas. m/z | # | Ion Formula | m/z err [ppm] | mSigma | #   | mSigma | Score  | rdB | e;Y  | Conf | N-Rule |
|-----------|---|-------------|---------------|--------|-----|--------|--------|-----|------|------|--------|
| 284.1612  | 1 | C16H23NNaO2 | 284.1621      | 3.1    | 1.5 | 1      | 100.00 | 6.0 | even |      | ok     |

## Mass Spectrum SmartFormula Report

**Analysis Info**

Analysis Name G:\ZM MS\0412\_RC7\_01\_12742.d  
 Method LC\_NO UV\_P50-1500\_6MIN.m  
 Sample Name 0412

Acquisition D 2022-04-13 13:19:40

Operator Demo User  
 Instrument compact 8255754.2017  
 6

**Comment**

**Acquisition Paramet**

|             |            |               |          |                  |           |
|-------------|------------|---------------|----------|------------------|-----------|
| Source Type | ESI        | Ion Polarity  | Positive | Set Nebulizer    | 3.0 Bar   |
| Focus       | Not active | Set Capillary | 4000 V   | Set Dry Heater   | 200 °C    |
| Scan Begin  | 50 m/z     | Set End Plate | -500 V   | Set Dry Gas      | 8.0 l/min |
| Scan End    | 1500 m/z   | Set Charging  | 2000 V   | Set Divert Valve | Waste     |
|             |            | Set Voltage   | 0 nA     | Set APCI Heater  | 0 °C      |

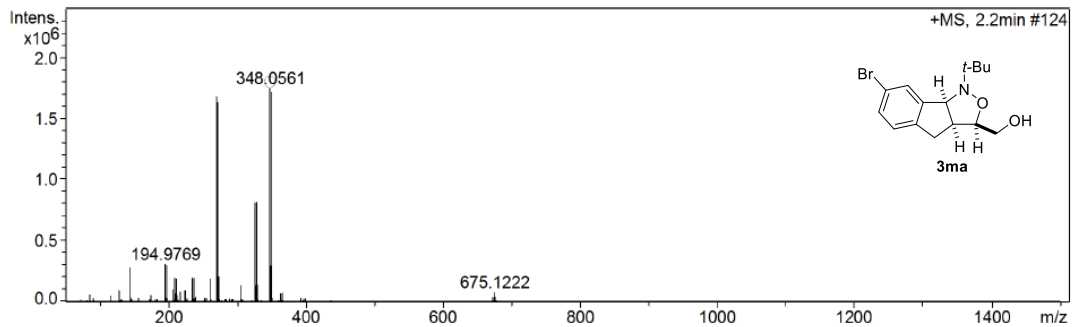

| Meas. m/z | # | Ion Formula   | m/z err [ppm] | mSigma | #   | mSigma | Score  | rdB | e;Y  | Conf | N-Rule |
|-----------|---|---------------|---------------|--------|-----|--------|--------|-----|------|------|--------|
| 348.0561  | 1 | C15H20BrNNaO2 | 348.0570      | 2.6    | 3.4 | 1      | 100.00 | 6.0 | even |      | ok     |

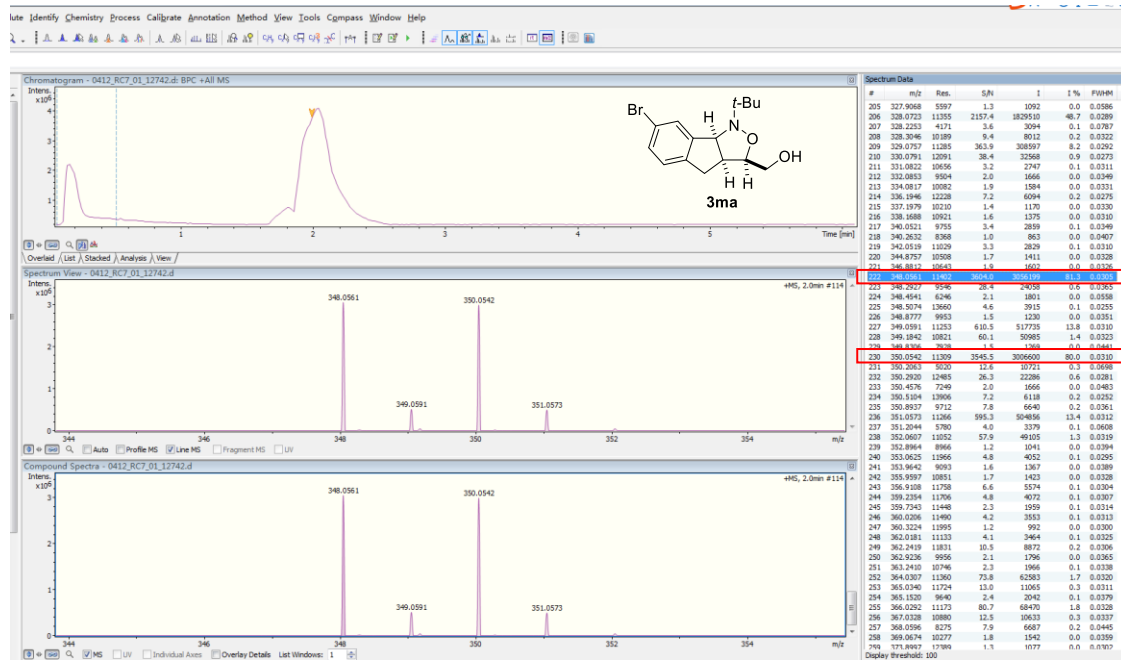

## Mass Spectrum SmartFormula Report

### Analysis Info

Analysis Name: G:\ZM MS\0412\_RC3\_01\_12738.d  
 Method: LC\_NO UV\_P50-1500\_6MIN.m  
 Sample Name: 0412

Acquisition D 2022-04-13 12:47:54

Operator: Demo User  
 Instrument: compact 8255754.2017  
 6

### Comment

### Acquisition Paramet

|             |            |               |          |                  |           |
|-------------|------------|---------------|----------|------------------|-----------|
| Source Type | ESI        | Ion Polarity  | Positive | Set Nebulizer    | 3.0 Bar   |
| Focus       | Not active | Set Capillary | 4000 V   | Set Dry Heater   | 200 °C    |
| Scan Begin  | 50 m/z     | Set End Plate | -500 V   | Set Dry Gas      | 8.0 l/min |
| Scan End    | 1500 m/z   | Set Charging  | 2000 V   | Set Divert Valve | Waste     |
|             |            | Set Corona    | 0 nA     | Set APCI Heater  | 0 °C      |

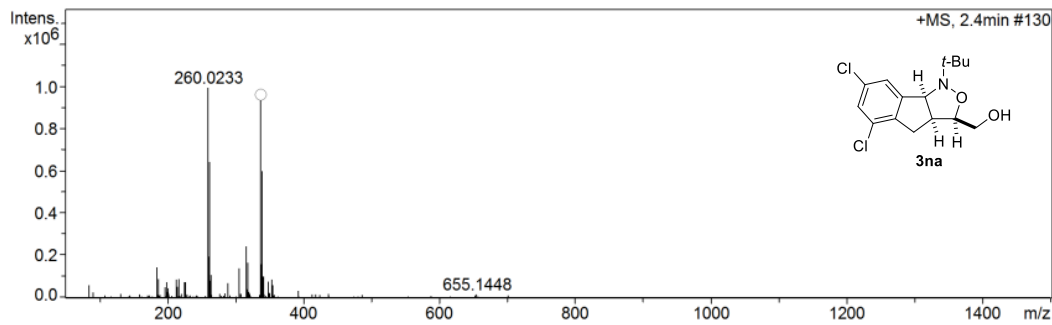

| Meas. m/z # | Ion Formula      | m/z err [ppm] | mSigma # | mSigma | Score | rdb    | e;Y | Conf | N-Rule |
|-------------|------------------|---------------|----------|--------|-------|--------|-----|------|--------|
| 338.0678    | 1 C15H19Cl2NNaO2 | 338.0685      | 2.2      | 6.8    | 1     | 100.00 | 6.0 | even | ok     |

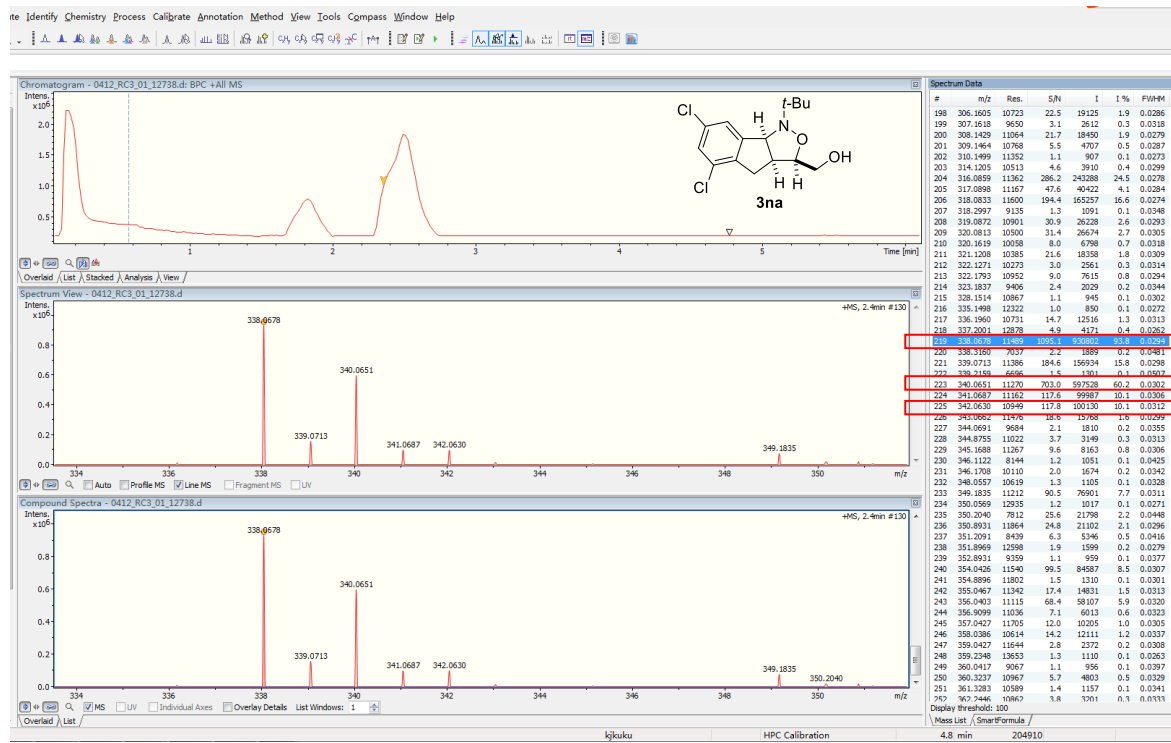

## Mass Spectrum SmartFormula Report

### Analysis Info

Analysis Name G:\ZM MS\0412\_RC8\_01\_12743.d  
 Method LC\_NO UV\_P50-1500\_6MIN.m  
 Sample Name 0412

Acquisition D 2022-04-13 13:27:19

Operator Demo User  
 Instrument compact 8255754.2017  
 6

### Comment

### Acquisition Paramet

|             |            |                      |          |                  |           |
|-------------|------------|----------------------|----------|------------------|-----------|
| Source Type | ESI        | Ion Polarity         | Positive | Set Nebulizer    | 3.0 Bar   |
| Focus       | Not active | Set Capillary        | 4000 V   | Set Dry Heater   | 200 °C    |
| Scan Begin  | 50 m/z     | Set End Plate        | -500 V   | Set Dry Gas      | 8.0 l/min |
| Scan End    | 1500 m/z   | Set Charging Voltage | 2000 V   | Set Divert Valve | Waste     |
|             |            | Set Voltage          | 0 nA     | Set APCI Heater  | 0 °C      |

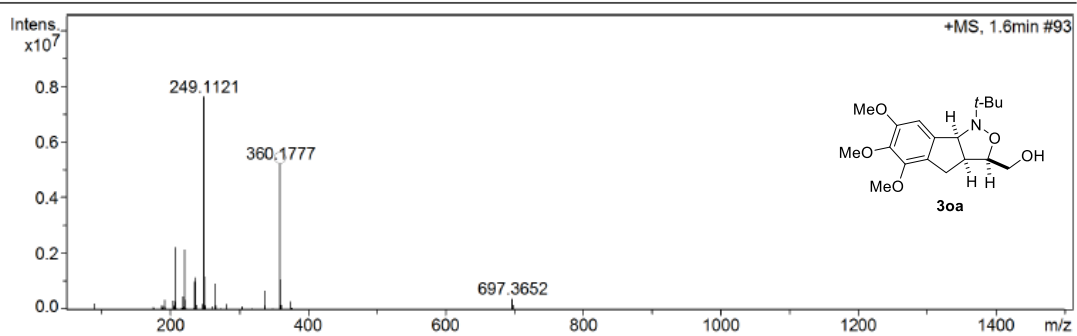

| Meas. m/z | # | Ion Formula | m/z      | err [ppm] | mSigma | # | mSigma | Score | rdB  | e | Conf | N-Rule |
|-----------|---|-------------|----------|-----------|--------|---|--------|-------|------|---|------|--------|
| 360.1777  | 1 | C18H27NNaO5 | 360.1781 | 1.3       | 0.3    | 1 | 100.00 | 6.0   | even |   |      | ok     |

## Mass Spectrum SmartFormula Report

|                                            |                                      |
|--------------------------------------------|--------------------------------------|
| Analysis Info                              | Acquisition D 2022-06-20 14:52:57    |
| Analysis Name G:\ZM MS\0617_GD1_01_14506.d |                                      |
| Method LC_NO UV_P50-1500_6MIN.m            | Operator Demo User                   |
| Sample Name 0617                           | Instrument compact 8255754.2017<br>6 |
| Comment                                    |                                      |

|                     |            |               |          |                  |           |
|---------------------|------------|---------------|----------|------------------|-----------|
| Acquisition Paramet |            |               |          |                  |           |
| Source Type         | ESI        | Ion Polarity  | Positive | Set Nebulizer    | 3.0 Bar   |
| Focus               | Not active | Set Capillary | 4000 V   | Set Dry Heater   | 50 °C     |
| Scan Begin          | 50 m/z     | Set End Plate | -500 V   | Set Dry Gas      | 4.0 l/min |
| Scan End            | 1500 m/z   | Set Charging  | 2000 V   | Set Divert Valve | Waste     |
|                     |            | Set Voltage   | 0 nA     | Set APCI Heater  | 0 °C      |

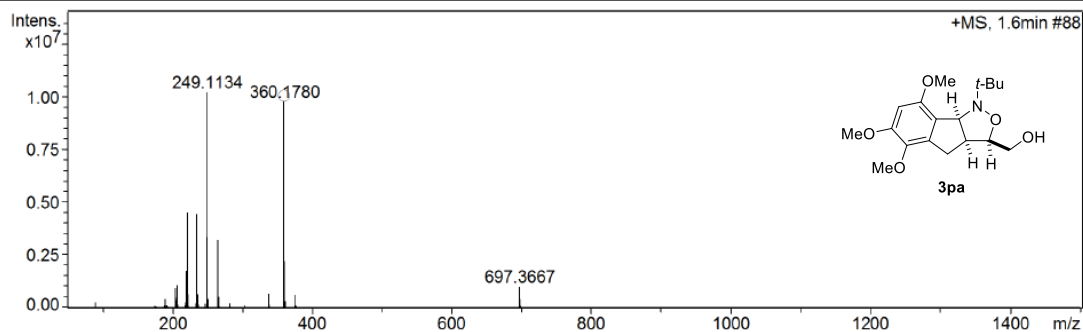

| Meas. m/z | # | Ion Formula | m/z err [ppm] | mSigma | #    | mSigma | Score  | rdB | e    | ¶ | Conf | N-Rule |
|-----------|---|-------------|---------------|--------|------|--------|--------|-----|------|---|------|--------|
| 360.1780  | 1 | C18H27NNaO5 | 360.1781      | 0.5    | 13.7 | 1      | 100.00 | 6.0 | even |   | ok   |        |

## Mass Spectrum SmartFormula Report

|                                            |                                      |
|--------------------------------------------|--------------------------------------|
| Analysis Info                              | Acquisition D 2022-04-13 11:14:10    |
| Analysis Name G:\ZM MS\0412_RA7_01_12726.d |                                      |
| Method LC_NO UV_P50-1500_6MIN.m            | Operator Demo User                   |
| Sample Name 0412                           | Instrument compact 8255754.2017<br>6 |
| Comment                                    |                                      |

|                     |            |               |          |                  |           |
|---------------------|------------|---------------|----------|------------------|-----------|
| Acquisition Paramet |            |               |          |                  |           |
| Source Type         | ESI        | Ion Polarity  | Positive | Set Nebulizer    | 3.0 Bar   |
| Focus               | Not active | Set Capillary | 4000 V   | Set Dry Heater   | 200 °C    |
| Scan Begin          | 50 m/z     | Set End Plate | -500 V   | Set Dry Gas      | 8.0 l/min |
| Scan End            | 1500 m/z   | Set Charging  | 2000 V   | Set Divert Valve | Waste     |
|                     |            | Set Voltage   | 0 nA     | Set APCI Heater  | 0 °C      |

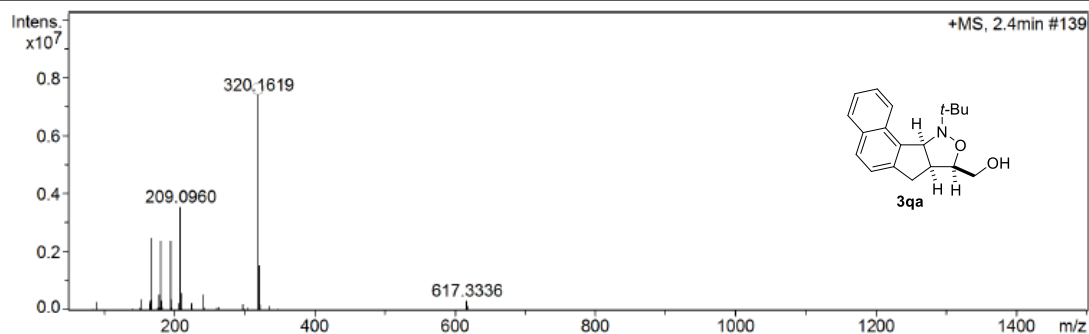

| Meas. m/z | # | Ion Formula | m/z err [ppm] | mSigma | #   | mSigma | Score  | rdB | e    | ¶ | Conf | N-Rule |
|-----------|---|-------------|---------------|--------|-----|--------|--------|-----|------|---|------|--------|
| 320.1619  | 1 | C19H23NNaO2 | 320.1621      | 0.5    | 2.7 | 1      | 100.00 | 9.0 | even |   | ok   |        |

## Mass Spectrum SmartFormula Report

**Analysis Info**

Analysis Name G:\ZM MS\0412\_RD1\_01\_12744.d  
 Method LC\_NO UV\_P50-1500\_6MIN.m  
 Sample Name 0412

Acquisition D 2022-04-13 13:35:25

Operator Demo User  
 Instrument compact 8255754.2017  
 6

**Comment**

**Acquisition Paramet**

|             |            |                 |          |                  |           |
|-------------|------------|-----------------|----------|------------------|-----------|
| Source Type | ESI        | Ion Polarity    | Positive | Set Nebulizer    | 3.0 Bar   |
| Focus       | Not active | Set Capillary   | 4000 V   | Set Dry Heater   | 200 °C    |
| Scan Begin  | 50 m/z     | Set End Plate   | -500 V   | Set Dry Gas      | 8.0 l/min |
| Scan End    | 1500 m/z   | Offset charging | 2000 V   | Set Divert Valve | Waste     |
|             |            | Voltage         | 0 nA     | Set APCI Heater  | 0 °C      |

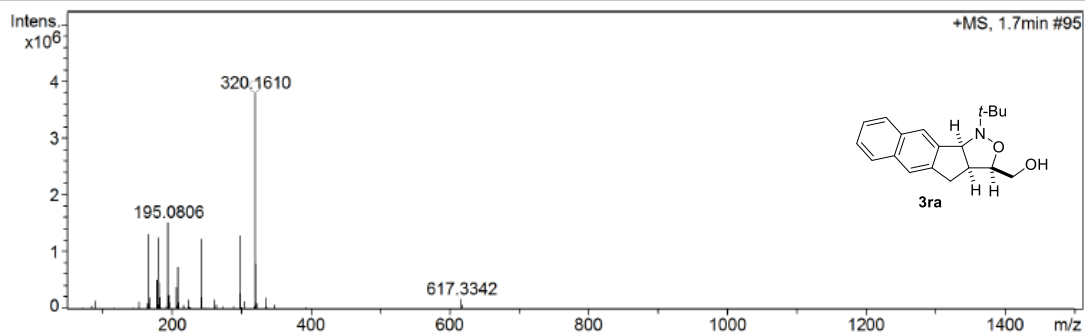

| Meas. m/z | # | Ion Formula | m/z      | err [ppm] | mSigma | # | mSigma | Score | rdb  | ej | Conf | N-Rule |
|-----------|---|-------------|----------|-----------|--------|---|--------|-------|------|----|------|--------|
| 320.1610  | 1 | C19H23NNaO2 | 320.1621 | 3.4       | 1.7    | 1 | 100.00 | 9.0   | even |    |      | ok     |

## Mass Spectrum SmartFormula Report

**Analysis Info**

Analysis Name G:\ZM MS\0412\_RC1\_01\_12736.d  
 Method LC\_NO UV\_P50-1500\_6MIN.m  
 Sample Name 0412

Acquisition D 2022-04-13 12:31:22

Operator Demo User  
 Instrument compact 8255754.2017  
 6

**Comment**

**Acquisition Paramet**

|             |            |                 |          |                  |           |
|-------------|------------|-----------------|----------|------------------|-----------|
| Source Type | ESI        | Ion Polarity    | Positive | Set Nebulizer    | 3.0 Bar   |
| Focus       | Not active | Set Capillary   | 4000 V   | Set Dry Heater   | 200 °C    |
| Scan Begin  | 50 m/z     | Set End Plate   | -500 V   | Set Dry Gas      | 8.0 l/min |
| Scan End    | 1500 m/z   | Offset charging | 2000 V   | Set Divert Valve | Waste     |
|             |            | Voltage         | 0 nA     | Set APCI Heater  | 0 °C      |

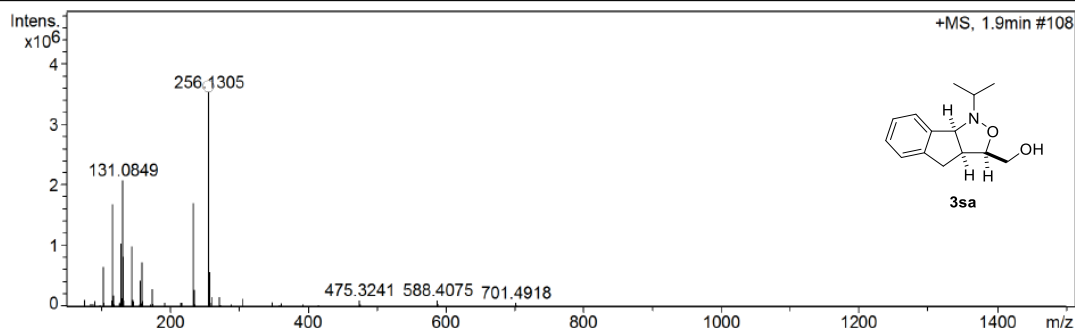

| Meas. m/z | # | Ion Formula | m/z      | err [ppm] | mSigma | # | mSigma | Score | rdb  | ej | Conf | N-Rule |
|-----------|---|-------------|----------|-----------|--------|---|--------|-------|------|----|------|--------|
| 256.1305  | 1 | C14H19NNaO2 | 256.1308 | 1.1       | 0.3    | 1 | 100.00 | 6.0   | even |    |      | ok     |

## Mass Spectrum SmartFormula Report

|                                            |                                     |
|--------------------------------------------|-------------------------------------|
| Analysis Info                              | Acquisition D 2022-04-13 12:16:08   |
| Analysis Name G:\ZM MS\0412_RB7_01_12734.d |                                     |
| Method LC_NO UV_P50-1500_6MIN.m            | Operator Demo User                  |
| Sample Name 0412                           | Instrumen compact 8255754.2017<br>6 |

Comment

|                     |            |               |          |                  |           |
|---------------------|------------|---------------|----------|------------------|-----------|
| Acquisition Paramet |            |               |          |                  |           |
| Source Type         | ESI        | Ion Polarity  | Positive | Set Nebulizer    | 3.0 Bar   |
| Focus               | Not active | Set Capillary | 4000 V   | Set Dry Heater   | 200 °C    |
| Scan Begin          | 50 m/z     | Set End Plate | -500 V   | Set Dry Gas      | 8.0 l/min |
| Scan End            | 1500 m/z   | Set Charging  | 2000 V   | Set Divert Valve | Waste     |
|                     |            | Set Voltage   | 0 nA     | Set APCI Heater  | 0 °C      |

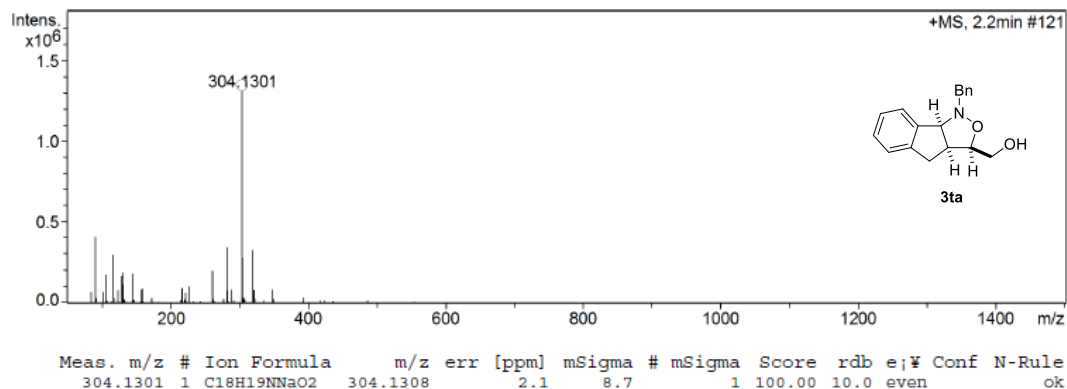

## Mass Spectrum SmartFormula Report

|                                            |                                     |
|--------------------------------------------|-------------------------------------|
| Analysis Info                              | Acquisition D 2022-06-20 13:27:52   |
| Analysis Name G:\ZM MS\0617_GB6_01_14495.d |                                     |
| Method LC_NO UV_P50-1500_6MIN.m            | Operator Demo User                  |
| Sample Name 0617                           | Instrumen compact 8255754.2017<br>6 |

Comment

|                     |            |               |          |                  |           |
|---------------------|------------|---------------|----------|------------------|-----------|
| Acquisition Paramet |            |               |          |                  |           |
| Source Type         | ESI        | Ion Polarity  | Positive | Set Nebulizer    | 3.0 Bar   |
| Focus               | Not active | Set Capillary | 4000 V   | Set Dry Heater   | 50 °C     |
| Scan Begin          | 50 m/z     | Set End Plate | -500 V   | Set Dry Gas      | 4.0 l/min |
| Scan End            | 1500 m/z   | Set Charging  | 2000 V   | Set Divert Valve | Waste     |
|                     |            | Set Voltage   | 0 nA     | Set APCI Heater  | 0 °C      |

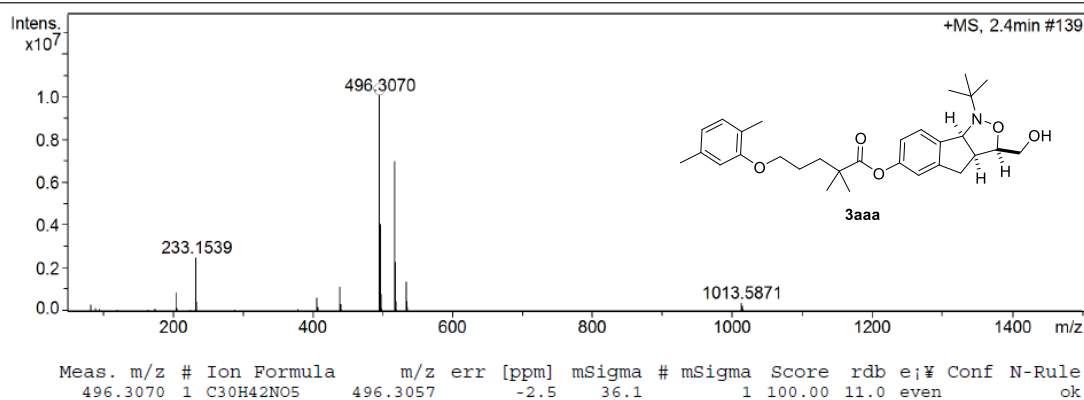

## Mass Spectrum SmartFormula Report

### Analysis Info

Analysis Name G:\ZM MS\0621\_GC8\_01\_14599.d  
Method LC\_NO UV\_P50-1500\_6MIN.m  
Sample Name 0621

Acquisition D 2022-06-24 16:22:37

Operator Demo User  
Instrument compact 8255754.2017  
6

### Comment

### Acquisition Paramet

|             |            |               |          |                  |           |
|-------------|------------|---------------|----------|------------------|-----------|
| Source Type | ESI        | Ion Polarity  | Positive | Set Nebulizer    | 3.0 Bar   |
| Focus       | Not active | Set Capillary | 4000 V   | Set Dry Heater   | 200 °C    |
| Scan Begin  | 50 m/z     | Set End Plate | -500 V   | Set Dry Gas      | 8.0 l/min |
| Scan End    | 1500 m/z   | Set Charging  | 2000 V   | Set Divert Valve | Waste     |
|             |            | Set Voltage   | 0 nA     | Set APCI Heater  | 0 °C      |

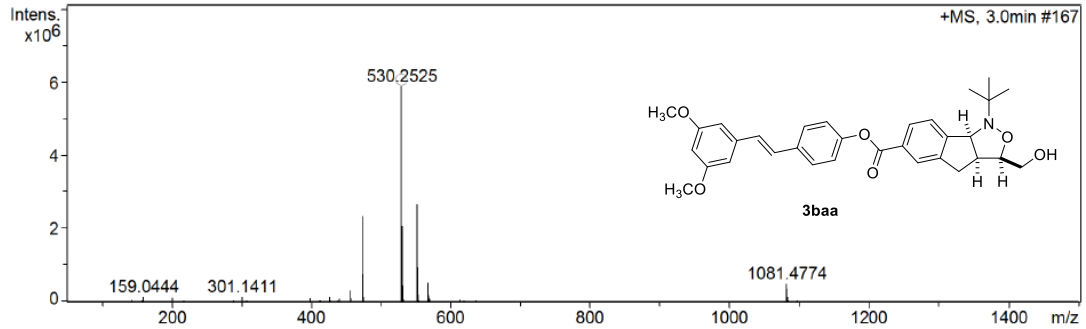

| Meas. m/z | # | Ion Formula | m/z err [ppm] | mSigma | #   | mSigma | Score  | rdb  | e;¶  | Conf | N-Rule |
|-----------|---|-------------|---------------|--------|-----|--------|--------|------|------|------|--------|
| 530.2525  | 1 | C32H36NO6   | 530.2537      | 2.3    | 1.6 | 1      | 100.00 | 16.0 | even |      | ok     |

## Mass Spectrum SmartFormula Report

### Analysis Info

Analysis Name G:\ZM MS\0621\_GC7\_01\_14601.d  
Method LC\_NO UV\_P50-1500\_6MIN.m  
Sample Name 0621

Acquisition D 2022-06-24 16:38:38

Operator Demo User  
Instrument compact 8255754.2017  
6

### Comment

### Acquisition Paramet

|             |            |               |          |                  |           |
|-------------|------------|---------------|----------|------------------|-----------|
| Source Type | ESI        | Ion Polarity  | Positive | Set Nebulizer    | 3.0 Bar   |
| Focus       | Not active | Set Capillary | 4000 V   | Set Dry Heater   | 200 °C    |
| Scan Begin  | 50 m/z     | Set End Plate | -500 V   | Set Dry Gas      | 8.0 l/min |
| Scan End    | 1500 m/z   | Set Charging  | 2000 V   | Set Divert Valve | Waste     |
|             |            | Set Voltage   | 0 nA     | Set APCI Heater  | 0 °C      |

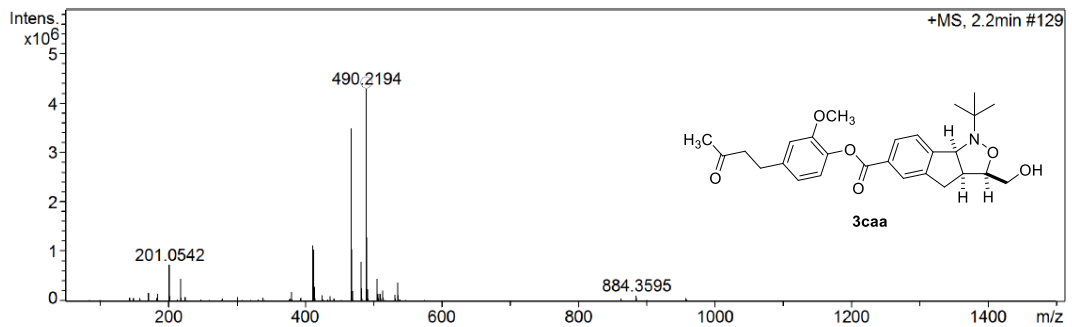

| Meas. m/z | # | Ion Formula | m/z err [ppm] | mSigma | #   | mSigma | Score  | rdb  | e;¶  | Conf | N-Rule |
|-----------|---|-------------|---------------|--------|-----|--------|--------|------|------|------|--------|
| 490.2194  | 1 | C27H33NNaO6 | 490.2200      | 1.3    | 1.2 | 1      | 100.00 | 12.0 | even |      | ok     |



## Mass Spectrum SmartFormula Report

### Analysis Info

Analysis Name G:\ZM MS\0617\_GA8\_01\_14489.d  
Method LC\_NO UV\_P50-1500\_6MIN.m  
Sample Name 0617

Acquisition D 2022-06-20 12:40:54

Operator Demo User  
Instrument compact 8255754.2017  
6

### Comment

### Acquisition Paramet

|             |            |               |          |                  |           |
|-------------|------------|---------------|----------|------------------|-----------|
| Source Type | ESI        | Ion Polarity  | Positive | Set Nebulizer    | 3.0 Bar   |
| Focus       | Not active | Set Capillary | 4000 V   | Set Dry Heater   | 50 °C     |
| Scan Begin  | 50 m/z     | Set End Plate | -500 V   | Set Dry Gas      | 4.0 l/min |
| Scan End    | 1500 m/z   | Set Charging  | 2000 V   | Set Divert Valve | Waste     |
|             |            | Set Voltage   | 0 nA     | Set APCI Heater  | 0 °C      |

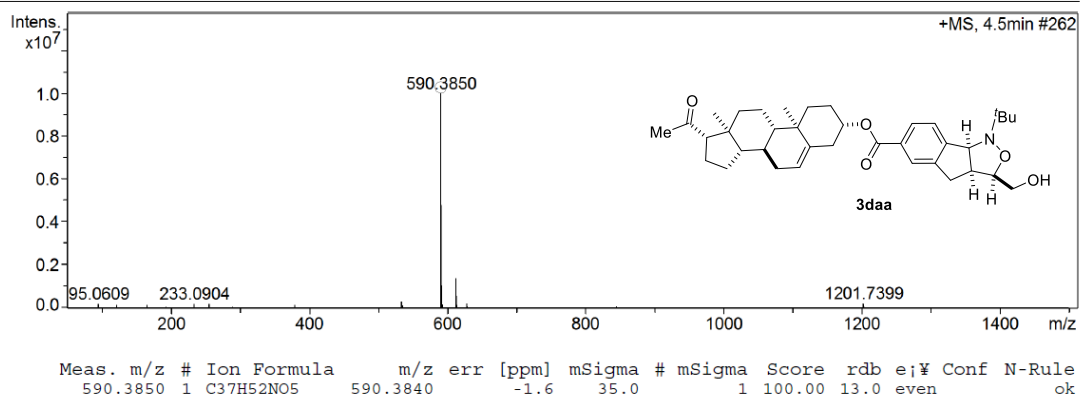

## Mass Spectrum SmartFormula Report

### Analysis Info

Analysis Name G:\ZM MS\0617\_GB4\_01\_14493.d  
Method LC\_NO UV\_P50-1500\_6MIN.m  
Sample Name 0617

Acquisition D 2022-06-20 13:11:51

Operator Demo User  
Instrument compact 8255754.2017  
6

### Comment

### Acquisition Paramet

|             |            |               |          |                  |           |
|-------------|------------|---------------|----------|------------------|-----------|
| Source Type | ESI        | Ion Polarity  | Positive | Set Nebulizer    | 3.0 Bar   |
| Focus       | Not active | Set Capillary | 4000 V   | Set Dry Heater   | 50 °C     |
| Scan Begin  | 50 m/z     | Set End Plate | -500 V   | Set Dry Gas      | 4.0 l/min |
| Scan End    | 1500 m/z   | Set Charging  | 2000 V   | Set Divert Valve | Waste     |
|             |            | Set Voltage   | 0 nA     | Set APCI Heater  | 0 °C      |

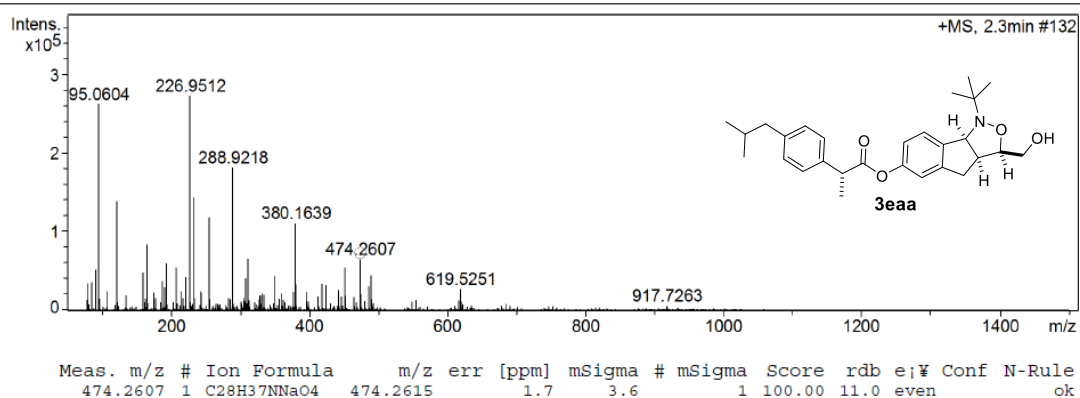

## Mass Spectrum SmartFormula Report

|                                            |                                      |
|--------------------------------------------|--------------------------------------|
| Analysis Info                              | Acquisition D 2022-06-20 12:48:46    |
| Analysis Name G:\ZM MS\0617_GB1_01_14490.d |                                      |
| Method LC_NO UV_P50-1500_6MIN.m            | Operator Demo User                   |
| Sample Name 0617                           | Instrument compact 8255754.2017<br>6 |
| Comment                                    |                                      |

|                     |            |               |          |                  |           |
|---------------------|------------|---------------|----------|------------------|-----------|
| Acquisition Paramet |            |               |          |                  |           |
| Source Type         | ESI        | Ion Polarity  | Positive | Set Nebulizer    | 3.0 Bar   |
| Focus               | Not active | Set Capillary | 4000 V   | Set Dry Heater   | 50 °C     |
| Scan Begin          | 50 m/z     | Set End Plate | -500 V   | Set Dry Gas      | 4.0 l/min |
| Scan End            | 1500 m/z   | Set Charging  | 2000 V   | Set Divert Valve | Waste     |
|                     |            | Set Voltage   | 0 nA     | Set APCI Heater  | 0 °C      |

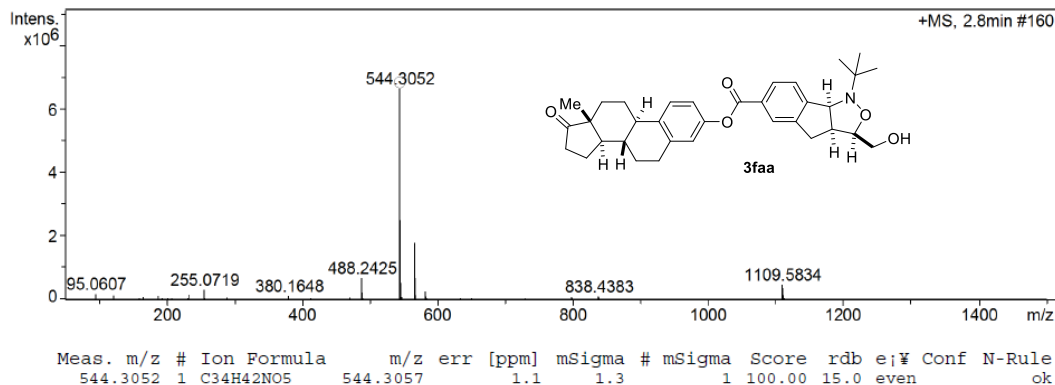

## Mass Spectrum SmartFormula Report

|                                            |                                      |
|--------------------------------------------|--------------------------------------|
| Analysis Info                              | Acquisition D 2022-06-20 13:03:59    |
| Analysis Name G:\ZM MS\0617_GB3_01_14492.d |                                      |
| Method LC_NO UV_P50-1500_6MIN.m            | Operator Demo User                   |
| Sample Name 0617                           | Instrument compact 8255754.2017<br>6 |
| Comment                                    |                                      |

|                     |            |               |          |                  |           |
|---------------------|------------|---------------|----------|------------------|-----------|
| Acquisition Paramet |            |               |          |                  |           |
| Source Type         | ESI        | Ion Polarity  | Positive | Set Nebulizer    | 3.0 Bar   |
| Focus               | Not active | Set Capillary | 4000 V   | Set Dry Heater   | 50 °C     |
| Scan Begin          | 50 m/z     | Set End Plate | -500 V   | Set Dry Gas      | 4.0 l/min |
| Scan End            | 1500 m/z   | Set Charging  | 2000 V   | Set Divert Valve | Waste     |
|                     |            | Set Voltage   | 0 nA     | Set APCI Heater  | 0 °C      |

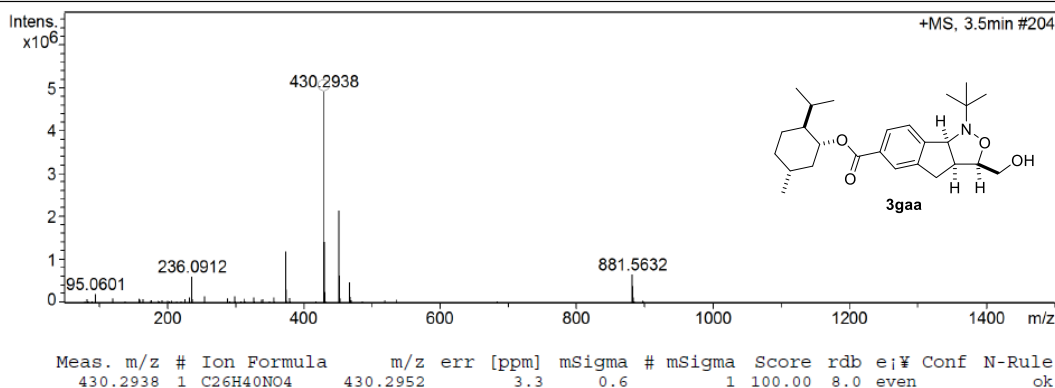

## Mass Spectrum SmartFormula Report

Analysis Info Acquisition D 2022-07-21 16:28:45  
 Analysis Name: \Desktop\0718\_BE3\_01\_15377.d  
 Method LC\_NO UV\_P50-1500\_30MIN.m Operator Demo User  
 Sample Name 0718 Instrument compact 8255754.2017  
6

Comment

### Acquisition Paramet

|             |            |                 |          |                  |           |
|-------------|------------|-----------------|----------|------------------|-----------|
| Source Type | ESI        | Ion Polarity    | Positive | Set Nebulizer    | 3.0 Bar   |
| Focus       | Not active | Set Capillary   | 4000 V   | Set Dry Heater   | 200 °C    |
| Scan Begin  | 50 m/z     | Set End Plate   | -500 V   | Set Dry Gas      | 8.0 l/min |
| Scan End    | 1500 m/z   | Offset charging | 2000 V   | Set Divert Valve | Waste     |
|             |            | Set Voltage     | 0 nA     | Set APCI Heater  | 0 °C      |

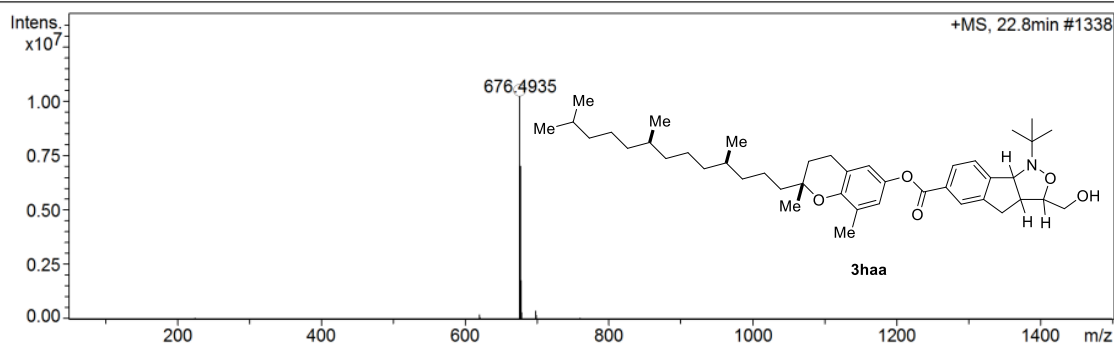

| Meas. m/z | # | Ion Formula | m/z      | err [ppm] | mSigma | # | mSigma | Score | rdb  | ej | Conf | N-Rule |
|-----------|---|-------------|----------|-----------|--------|---|--------|-------|------|----|------|--------|
| 676.4935  | 1 | C43H66NO5   | 676.4936 | 0.1       | 108.7  | 1 | 100.00 | 12.0  | even |    |      | ok     |

## Mass Spectrum SmartFormula Report

Analysis Info Acquisition D 2022-04-13 13:51:27  
 Analysis Name: \ZM MS\0412\_RD3\_01\_12746.d  
 Method LC\_NO UV\_P50-1500\_6MIN.m Operator Demo User  
 Sample Name 0412 Instrument compact 8255754.2017  
6

Comment

### Acquisition Paramet

|             |            |                 |          |                  |           |
|-------------|------------|-----------------|----------|------------------|-----------|
| Source Type | ESI        | Ion Polarity    | Positive | Set Nebulizer    | 3.0 Bar   |
| Focus       | Not active | Set Capillary   | 4000 V   | Set Dry Heater   | 200 °C    |
| Scan Begin  | 50 m/z     | Set End Plate   | -500 V   | Set Dry Gas      | 8.0 l/min |
| Scan End    | 1500 m/z   | Offset charging | 2000 V   | Set Divert Valve | Waste     |
|             |            | Set Voltage     | 0 nA     | Set APCI Heater  | 0 °C      |

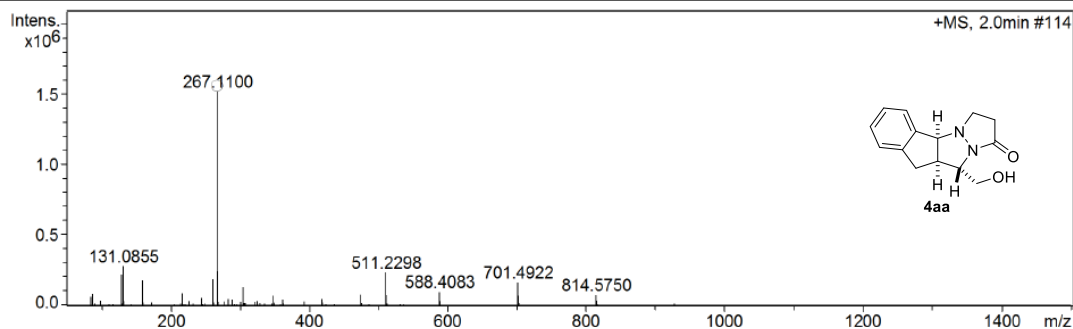

| Meas. m/z | # | Ion Formula  | m/z      | err [ppm] | mSigma | # | mSigma | Score | rdb  | ej | Conf | N-Rule |
|-----------|---|--------------|----------|-----------|--------|---|--------|-------|------|----|------|--------|
| 267.1100  | 1 | C14H16N2NaO2 | 267.1104 | 1.3       | 1.1    | 1 | 100.00 | 8.0   | even |    |      | ok     |

# Mass Spectrum SmartFormula Report

## Analysis Info

Analysis Name G:\ZM MS\0412\_RD2\_01\_12745.d  
 Method LC\_NO UV\_P50-1500\_6MIN.m  
 Sample Name 0412

Acquisition D 2022-04-13 13:43:33

Operator Demo User  
 Instrument compact 8255754.2017  
 6

## Comment

## Acquisition Paramet

|             |            |               |          |                  |           |
|-------------|------------|---------------|----------|------------------|-----------|
| Source Type | ESI        | Ion Polarity  | Positive | Set Nebulizer    | 3.0 Bar   |
| Focus       | Not active | Set Capillary | 4000 V   | Set Dry Heater   | 200 °C    |
| Scan Begin  | 50 m/z     | Set End Plate | -500 V   | Set Dry Gas      | 8.0 l/min |
| Scan End    | 1500 m/z   | Set Charging  | 2000 V   | Set Divert Valve | Waste     |
|             |            | Set Voltage   | 0 nA     | Set APCI Heater  | 0 °C      |

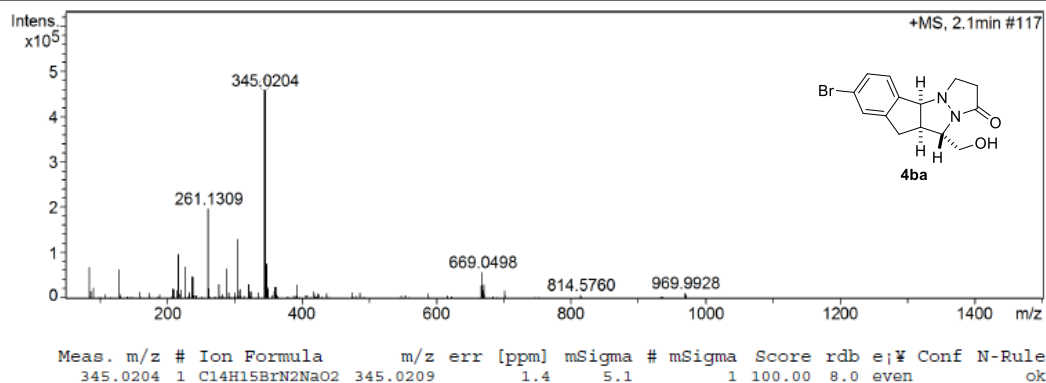

Identify Chemistry Process Calibrate Annotation Method View Tools Compass Window Help

**Chromatogram - 0412\_RD2\_01\_12745.d: BPC + All MS**

**Spectrum View - 0412\_RD2\_01\_12745.d**

**Compound Spectra - 0412\_RD2\_01\_12745.d**

| #   | m/z      | Res.  | S/N   | I     | I %   | FWHM   |
|-----|----------|-------|-------|-------|-------|--------|
| 155 | 315.1240 | 10172 | 1.3   | 1097  | 0.4   | 0.0310 |
| 156 | 320.1601 | 10371 | 1.8   | 1557  | 0.6   | 0.0309 |
| 157 | 321.1224 | 11409 | 34.8  | 29449 | 10.7  | 0.0281 |
| 158 | 322.0312 | 7438  | 1.5   | 1242  | 0.5   | 0.0433 |
| 159 | 322.1263 | 12644 | 5.2   | 4953  | 1.6   | 0.0235 |
| 160 | 322.1786 | 11757 | 10.6  | 8551  | 3.3   | 0.0274 |
| 161 | 323.0389 | 10740 | 9.7   | 8274  | 3.0   | 0.0301 |
| 162 | 323.1201 | 10135 | 1.5   | 1281  | 0.5   | 0.0319 |
| 163 | 323.1813 | 11987 | 3.0   | 2376  | 0.9   | 0.0269 |
| 164 | 324.0364 | 9636  | 2.8   | 2387  | 0.9   | 0.0336 |
| 165 | 325.0376 | 11088 | 10.7  | 9108  | 3.3   | 0.0293 |
| 166 | 326.0429 | 11146 | 2.0   | 1686  | 0.6   | 0.0293 |
| 167 | 328.0727 | 11986 | 1.8   | 1496  | 0.5   | 0.0274 |
| 168 | 329.0514 | 11425 | 1.0   | 868   | 0.3   | 0.0288 |
| 169 | 331.1139 | 8997  | 1.2   | 1042  | 0.4   | 0.0364 |
| 170 | 333.1063 | 12874 | 1.0   | 887   | 0.3   | 0.0259 |
| 171 | 336.1948 | 11362 | 17.1  | 14582 | 5.3   | 0.0296 |
| 172 | 337.1980 | 11018 | 3.9   | 3298  | 1.2   | 0.0306 |
| 173 | 338.1758 | 8309  | 2.2   | 1859  | 0.7   | 0.0407 |
| 174 | 338.3480 | 9638  | 1.1   | 926   | 0.3   | 0.0351 |
| 175 | 339.1346 | 10173 | 2.2   | 1880  | 0.7   | 0.0333 |
| 176 | 341.1010 | 10643 | 1.6   | 1362  | 0.5   | 0.0320 |
| 177 | 348.0254 | 11849 | 3.7   | 3182  | 1.2   | 0.0291 |
| 178 | 348.0204 | 11483 | 324.3 | 27965 | 100.0 | 0.0300 |
| 179 | 348.0243 | 11016 | 29.6  | 49202 | 16.3  | 0.0314 |
| 180 | 347.0184 | 11560 | 319.9 | 27232 | 89.7  | 0.0300 |
| 181 | 348.0220 | 11474 | 10.7  | 4519  | 15.6  | 0.0303 |
| 182 | 349.0272 | 8968  | 4.7   | 3972  | 1.4   | 0.0389 |
| 183 | 349.1832 | 11251 | 88.3  | 75107 | 27.2  | 0.0310 |
| 184 | 350.0561 | 10481 | 4.4   | 3765  | 1.4   | 0.0334 |
| 185 | 350.2033 | 8124  | 28.2  | 23981 | 8.7   | 0.0431 |
| 186 | 350.8923 | 12335 | 25.6  | 21793 | 7.9   | 0.0284 |
| 187 | 351.2103 | 8662  | 6.9   | 5903  | 2.1   | 0.0405 |
| 188 | 351.8958 | 12041 | 1.8   | 1538  | 0.6   | 0.0292 |
| 189 | 354.8843 | 10753 | 1.5   | 1249  | 0.5   | 0.0330 |
| 190 | 356.9096 | 11200 | 6.6   | 5622  | 2.0   | 0.0319 |
| 191 | 359.2359 | 12956 | 4.1   | 3467  | 1.3   | 0.0277 |
| 192 | 359.7268 | 11638 | 1.6   | 1360  | 0.5   | 0.0309 |
| 193 | 360.1732 | 9972  | 1.0   | 851   | 0.3   | 0.0361 |
| 194 | 360.3229 | 11996 | 16.6  | 14132 | 5.1   | 0.0301 |
| 195 | 360.9939 | 10521 | 26.0  | 21125 | 8.0   | 0.0290 |
| 196 | 361.3262 | 12283 | 3.9   | 3350  | 1.2   | 0.0294 |
| 197 | 361.9962 | 11912 | 4.1   | 3531  | 1.3   | 0.0304 |
| 198 | 362.2421 | 11279 | 34.9  | 29683 | 10.8  | 0.0321 |
| 199 | 362.7446 | 12414 | 8.9   | 7533  | 2.7   | 0.0292 |
| 200 | 362.9253 | 7945  | 6.2   | 5313  | 1.9   | 0.0457 |
| 201 | 362.9919 | 11578 | 28.8  | 24522 | 8.9   | 0.0314 |
| 202 | 363.2448 | 11047 | 4.6   | 3875  | 1.4   | 0.0329 |
| 203 | 363.9969 | 11123 | 4.4   | 3748  | 1.4   | 0.0327 |
| 204 | 365.0044 | 5395  | 2.0   | 1715  | 0.6   | 0.0677 |
| 205 | 365.1505 | 9633  | 5.4   | 4571  | 1.7   | 0.0379 |
| 206 | 372.1884 | 11707 | 1.2   | 1008  | 0.4   | 0.0318 |
| 207 | 373.8974 | 15257 | 1.5   | 1318  | 0.5   | 0.0245 |
| 208 | 376.2277 | 9790  | 1.9   | 1613  | 0.6   | 0.0286 |
| 209 | 376.7410 | 11467 | 1.5   | 1254  | 0.5   | 0.0278 |

## Mass Spectrum SmartFormula Report

### Analysis Info

Analysis Name G:\ZM MS\0621\_GD1\_01\_14602.d  
Method LC\_NO UV\_P50-1500\_6MIN.m  
Sample Name 0621

Acquisition D 2022-06-24 16:46:14

Operator Demo User  
Instrument compact 8255754.2017  
6

### Comment

### Acquisition Paramet

|             |            |               |          |                  |           |
|-------------|------------|---------------|----------|------------------|-----------|
| Source Type | ESI        | Ion Polarity  | Positive | Set Nebulizer    | 3.0 Bar   |
| Focus       | Not active | Set Capillary | 4000 V   | Set Dry Heater   | 200 °C    |
| Scan Begin  | 50 m/z     | Set End Plate | -500 V   | Set Dry Gas      | 8.0 l/min |
| Scan End    | 1500 m/z   | Set Charging  | 2000 V   | Set Divert Valve | Waste     |
|             |            | Set Voltage   | 0 nA     | Set APCI Heater  | 0 °C      |

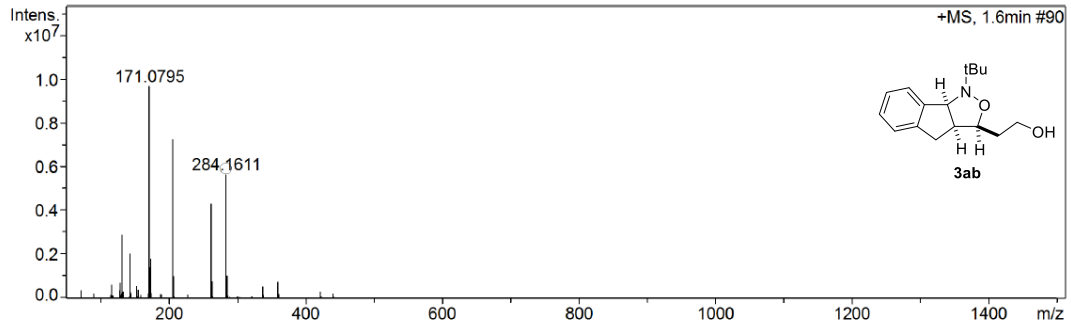

| Meas. m/z | # | Ion Formula | m/z err [ppm] | mSigma | #   | mSigma | Score  | rdb | e;Y  | Conf | N-Rule |
|-----------|---|-------------|---------------|--------|-----|--------|--------|-----|------|------|--------|
| 284.1611  | 1 | C16H23NNaO2 | 284.1621      | 3.5    | 0.5 | 1      | 100.00 | 6.0 | even |      | ok     |

## Mass Spectrum SmartFormula Report

### Analysis Info

Analysis Name G:\ZM MS\0617\_GD3\_01\_14508.d  
Method LC\_NO UV\_P50-1500\_6MIN.m  
Sample Name 0617

Acquisition D 2022-06-20 15:07:38

Operator Demo User  
Instrument compact 8255754.2017  
6

### Comment

### Acquisition Paramet

|             |            |               |          |                  |           |
|-------------|------------|---------------|----------|------------------|-----------|
| Source Type | ESI        | Ion Polarity  | Positive | Set Nebulizer    | 3.0 Bar   |
| Focus       | Not active | Set Capillary | 4000 V   | Set Dry Heater   | 50 °C     |
| Scan Begin  | 50 m/z     | Set End Plate | -500 V   | Set Dry Gas      | 4.0 l/min |
| Scan End    | 1500 m/z   | Set Charging  | 2000 V   | Set Divert Valve | Waste     |
|             |            | Set Voltage   | 0 nA     | Set APCI Heater  | 0 °C      |

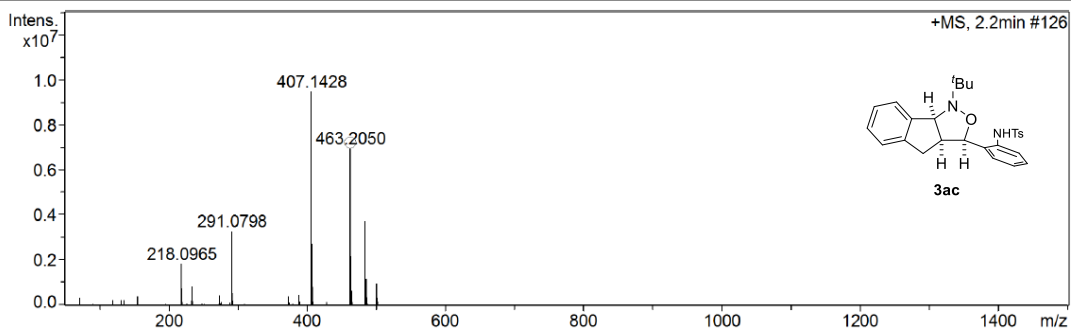

| Meas. m/z | # | Ion Formula | m/z err [ppm] | mSigma | #   | mSigma | Score  | rdb  | e;Y  | Conf | N-Rule |
|-----------|---|-------------|---------------|--------|-----|--------|--------|------|------|------|--------|
| 463.2050  | 1 | C27H31N2O3S | 463.2050      | 0.1    | 3.7 | 1      | 100.00 | 14.0 | even |      | ok     |

## Mass Spectrum SmartFormula Report

### Analysis Info

Analysis Name G:\ZM MS\0504\_GA5\_01\_13319.d  
Method LC\_NO UV\_P50-1500\_20MIN.m  
Sample Name 0504

Acquisition D 2022-05-06 0:32:09

Operator Demo User  
Instrument compact 8255754.2017  
6

### Comment

### Acquisition Paramet

|             |            |               |          |                  |           |
|-------------|------------|---------------|----------|------------------|-----------|
| Source Type | ESI        | Ion Polarity  | Positive | Set Nebulizer    | 3.0 Bar   |
| Focus       | Not active | Set Capillary | 4000 V   | Set Dry Heater   | 200 °C    |
| Scan Begin  | 50 m/z     | Set End Plate | -500 V   | Set Dry Gas      | 8.0 l/min |
| Scan End    | 1500 m/z   | Set Charging  | 2000 V   | Set Divert Valve | Waste     |
|             |            | Set Corona    | 0 nA     | Set APCI Heater  | 0 °C      |

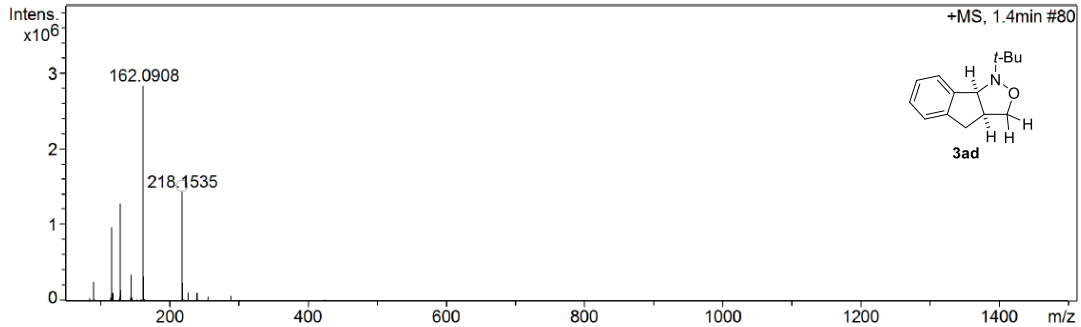

| Meas. m/z | # | Ion Formula | m/z err [ppm] | mSigma | #   | mSigma | Score  | rdb | ej   | Y | Conf | N-Rule |
|-----------|---|-------------|---------------|--------|-----|--------|--------|-----|------|---|------|--------|
| 218.1535  | 1 | C14H20NO    | 218.1539      | 2.2    | 1.3 | 1      | 100.00 | 6.0 | even |   |      | ok     |

## Mass Spectrum SmartFormula Report

### Analysis Info

Analysis Name G:\ZM MS\0715\_BE3\_01\_15261.d  
Method LC\_NO UV\_P50-1500\_6MIN.m  
Sample Name 0715

Acquisition D 2022-07-18 23:59:46

Operator Demo User  
Instrument compact 8255754.2017  
6

### Comment

### Acquisition Paramet

|             |            |               |          |                  |           |
|-------------|------------|---------------|----------|------------------|-----------|
| Source Type | ESI        | Ion Polarity  | Positive | Set Nebulizer    | 3.0 Bar   |
| Focus       | Not active | Set Capillary | 4000 V   | Set Dry Heater   | 200 °C    |
| Scan Begin  | 50 m/z     | Set End Plate | -500 V   | Set Dry Gas      | 8.0 l/min |
| Scan End    | 1500 m/z   | Set Charging  | 2000 V   | Set Divert Valve | Waste     |
|             |            | Set Corona    | 0 nA     | Set APCI Heater  | 0 °C      |

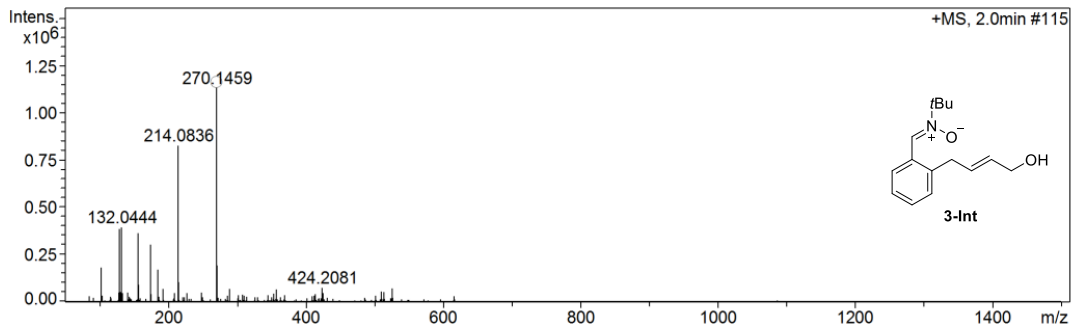

| Meas. m/z | # | Ion Formula | m/z err [ppm] | mSigma | #   | mSigma | Score  | rdb | ej   | Y | Conf | N-Rule |
|-----------|---|-------------|---------------|--------|-----|--------|--------|-----|------|---|------|--------|
| 270.1459  | 1 | C15H21NNO2  | 270.1464      | 1.9    | 0.7 | 1      | 100.00 | 6.0 | even |   |      | ok     |

## Mass Spectrum SmartFormula Report

**Analysis Info**

Analysis Name G:\ZM MS\0504\_RE8\_01\_13314.d  
 Method LC\_NO UV\_P50-1500\_20MIN.m  
 Sample Name 0504

Acquisition D 2022-05-05 22:45:50

Operator Demo User  
 Instrument compact 8255754.2017  
 6

**Comment**

**Acquisition Paramet**

|             |            |                 |          |                  |           |
|-------------|------------|-----------------|----------|------------------|-----------|
| Source Type | ESI        | Ion Polarity    | Positive | Set Nebulizer    | 3.0 Bar   |
| Focus       | Not active | Set Capillary   | 4000 V   | Set Dry Heater   | 200 °C    |
| Scan Begin  | 50 m/z     | Set End Plate   | -500 V   | Set Dry Gas      | 8.0 l/min |
| Scan End    | 1500 m/z   | Offset charging | 2000 V   | Set Divert Valve | Waste     |
|             |            | Set APCI Heater | 0 nA     | Set APCI Heater  | 0 °C      |

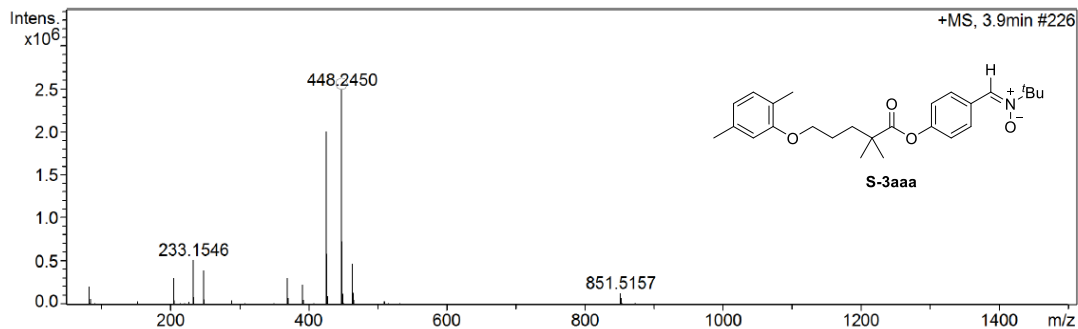

| Meas. m/z | # | Ion Formula | m/z err [ppm] | mSigma | #   | mSigma | Score  | rdb  | e;¥  | Conf | N-Rule |
|-----------|---|-------------|---------------|--------|-----|--------|--------|------|------|------|--------|
| 448.2450  | 1 | C26H35NNaO4 | 448.2458      | 2.0    | 2.4 | 1      | 100.00 | 10.0 | even |      | ok     |

## Mass Spectrum SmartFormula Report

**Analysis Info**

Analysis Name G:\ZM MS\0617\_GC4\_01\_14501.d  
 Method LC\_NO UV\_P50-1500\_6MIN.m  
 Sample Name 0617

Acquisition D 2022-06-20 14:14:05

Operator Demo User  
 Instrument compact 8255754.2017  
 6

**Comment**

**Acquisition Paramet**

|             |            |                 |          |                  |           |
|-------------|------------|-----------------|----------|------------------|-----------|
| Source Type | ESI        | Ion Polarity    | Positive | Set Nebulizer    | 3.0 Bar   |
| Focus       | Not active | Set Capillary   | 4000 V   | Set Dry Heater   | 50 °C     |
| Scan Begin  | 50 m/z     | Set End Plate   | -500 V   | Set Dry Gas      | 4.0 l/min |
| Scan End    | 1500 m/z   | Offset charging | 2000 V   | Set Divert Valve | Waste     |
|             |            | Set APCI Heater | 0 nA     | Set APCI Heater  | 0 °C      |

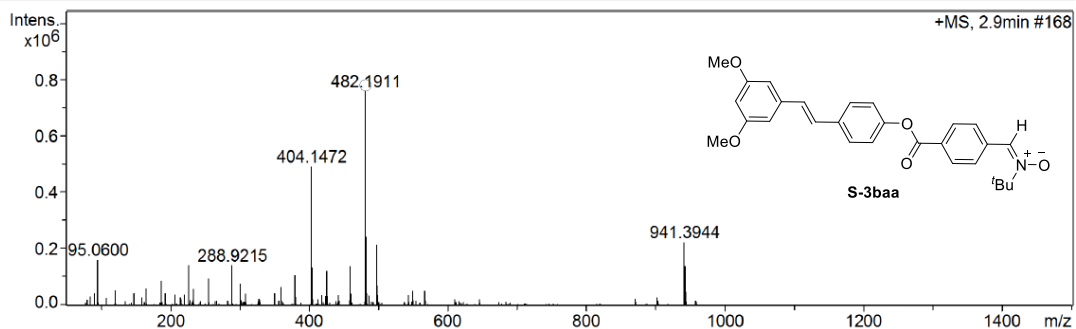

| Meas. m/z | # | Ion Formula | m/z err [ppm] | mSigma | #   | mSigma | Score  | rdb  | e;¥  | Conf | N-Rule |
|-----------|---|-------------|---------------|--------|-----|--------|--------|------|------|------|--------|
| 482.1911  | 1 | C28H29NNaO5 | 482.1938      | 5.7    | 5.3 | 1      | 100.00 | 15.0 | even |      | ok     |

## Mass Spectrum SmartFormula Report

### Analysis Info

Analysis Name G:\ZM MS\0504\_GA1\_01\_13315.d  
Method LC\_NO UV\_P50-1500\_20MIN.m  
Sample Name 0504

Acquisition D 2022-05-05 23:07:05

Operator Demo User  
Instrument compact 8255754.2017  
6

### Comment

### Acquisition Paramet

|             |            |               |          |                  |           |
|-------------|------------|---------------|----------|------------------|-----------|
| Source Type | ESI        | Ion Polarity  | Positive | Set Nebulizer    | 3.0 Bar   |
| Focus       | Not active | Set Capillary | 4000 V   | Set Dry Heater   | 200 °C    |
| Scan Begin  | 50 m/z     | Set End Plate | -500 V   | Set Dry Gas      | 8.0 l/min |
| Scan End    | 1500 m/z   | Set Charging  | 2000 V   | Set Divert Valve | Waste     |
|             |            | Set Response  | 0 nA     | Set APCI Heater  | 0 °C      |

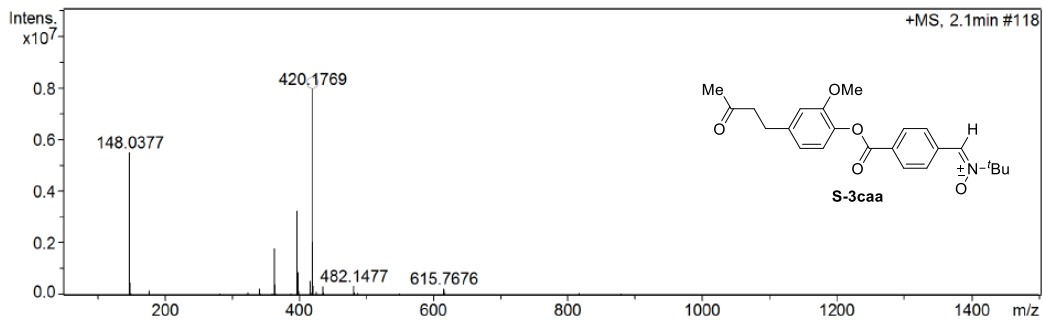

| Meas. m/z | # | Ion Formula | m/z err [ppm] | mSigma | #   | mSigma | Score  | rdb  | e    | ¥ | Conf | N-Rule |
|-----------|---|-------------|---------------|--------|-----|--------|--------|------|------|---|------|--------|
| 420.1769  | 1 | C23H27NNaO5 | 420.1781      | 3.0    | 0.8 | 1      | 100.00 | 11.0 | even |   | ok   |        |

## Mass Spectrum SmartFormula Report

### Analysis Info

Analysis Name G:\ZM MS\0617\_GC2\_01\_14499.d  
Method LC\_NO UV\_P50-1500\_6MIN.m  
Sample Name 0617

Acquisition D 2022-06-20 13:59:09

Operator Demo User  
Instrument compact 8255754.2017  
6

### Comment

### Acquisition Paramet

|             |            |               |          |                  |           |
|-------------|------------|---------------|----------|------------------|-----------|
| Source Type | ESI        | Ion Polarity  | Positive | Set Nebulizer    | 3.0 Bar   |
| Focus       | Not active | Set Capillary | 4000 V   | Set Dry Heater   | 50 °C     |
| Scan Begin  | 50 m/z     | Set End Plate | -500 V   | Set Dry Gas      | 4.0 l/min |
| Scan End    | 1500 m/z   | Set Charging  | 2000 V   | Set Divert Valve | Waste     |
|             |            | Set Response  | 0 nA     | Set APCI Heater  | 0 °C      |

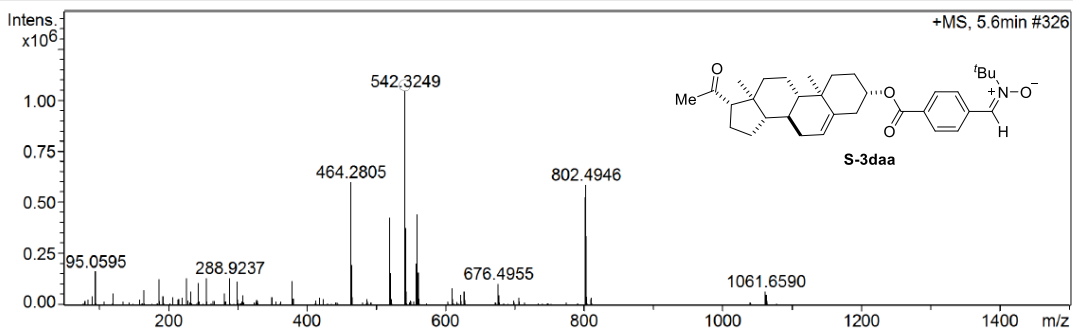

| Meas. m/z | # | Ion Formula | m/z err [ppm] | mSigma | #   | mSigma | Score  | rdb  | e    | ¥ | Conf | N-Rule |
|-----------|---|-------------|---------------|--------|-----|--------|--------|------|------|---|------|--------|
| 542.3249  | 1 | C33H45NNaO4 | 542.3241      | -1.5   | 6.3 | 1      | 100.00 | 12.0 | even |   | ok   |        |



## Mass Spectrum SmartFormula Report

**Analysis Info**

Analysis Name G:\ZM MS\0504\_GA3\_01\_13317.d  
 Method LC\_NO UV\_P50-1500\_20MIN.m  
 Sample Name 0504

Acquisition D 2022-05-05 23:49:38

Operator Demo User  
 Instrument compact 8255754.2017  
 6

**Comment**

**Acquisition Paramet**

|             |            |               |          |                  |           |
|-------------|------------|---------------|----------|------------------|-----------|
| Source Type | ESI        | Ion Polarity  | Positive | Set Nebulizer    | 3.0 Bar   |
| Focus       | Not active | Set Capillary | 4000 V   | Set Dry Heater   | 200 °C    |
| Scan Begin  | 50 m/z     | Set End Plate | -500 V   | Set Dry Gas      | 8.0 l/min |
| Scan End    | 1500 m/z   | Set Charging  | 2000 V   | Set Divert Valve | Waste     |
|             |            | Set Voltage   | 0 nA     | Set APCI Heater  | 0 °C      |

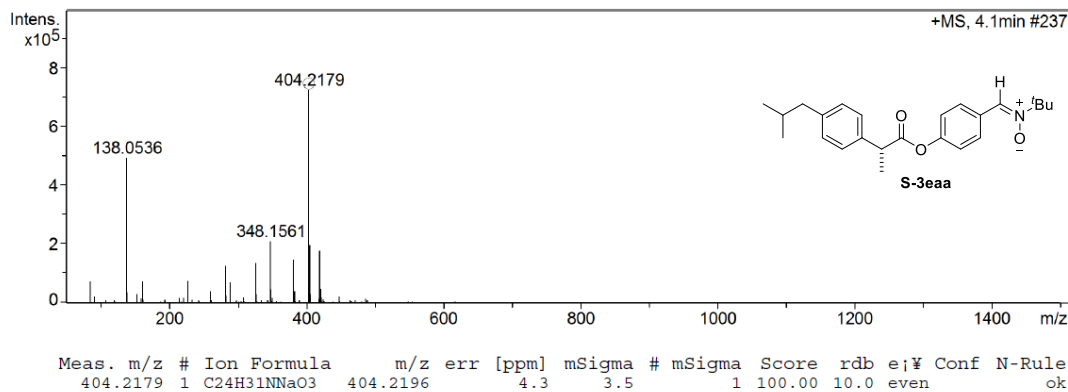

## Mass Spectrum SmartFormula Report

**Analysis Info**

Analysis Name G:\ZM MS\0617\_GC3\_01\_14500.d  
 Method LC\_NO UV\_P50-1500\_6MIN.m  
 Sample Name 0617

Acquisition D 2022-06-20 14:06:44

Operator Demo User  
 Instrument compact 8255754.2017  
 6

**Comment**

**Acquisition Paramet**

|             |            |               |          |                  |           |
|-------------|------------|---------------|----------|------------------|-----------|
| Source Type | ESI        | Ion Polarity  | Positive | Set Nebulizer    | 3.0 Bar   |
| Focus       | Not active | Set Capillary | 4000 V   | Set Dry Heater   | 50 °C     |
| Scan Begin  | 50 m/z     | Set End Plate | -500 V   | Set Dry Gas      | 4.0 l/min |
| Scan End    | 1500 m/z   | Set Charging  | 2000 V   | Set Divert Valve | Waste     |
|             |            | Set Voltage   | 0 nA     | Set APCI Heater  | 0 °C      |

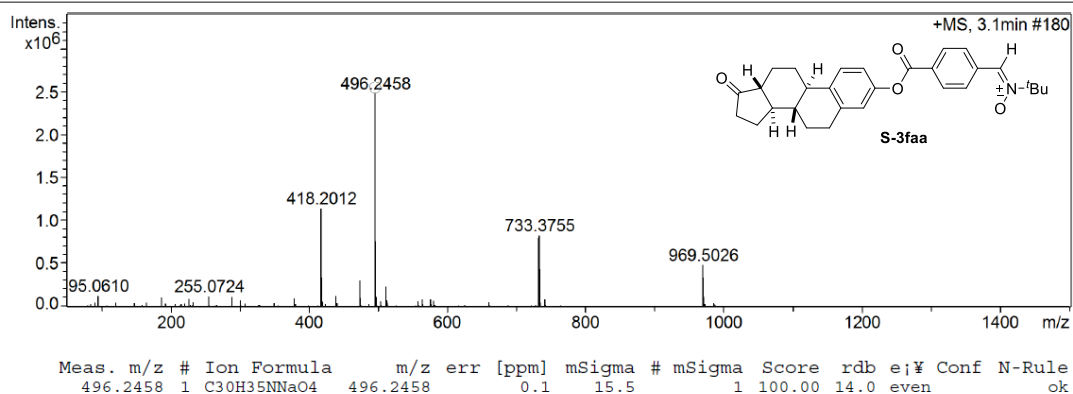

## Mass Spectrum SmartFormula Report

**Analysis Info** Acquisition D 2022-05-05 23:28:21  
 Analysis Name G:\ZM MS\0504\_GA2\_01\_13316.d  
 Method LC\_NO UV\_P50-1500\_20MIN.m Operator Demo User  
 Sample Name 0504 Instrument compact 8255754.2017

Comment

**Acquisition Paramet**

|             |            |               |          |                  |           |
|-------------|------------|---------------|----------|------------------|-----------|
| Source Type | ESI        | Ion Polarity  | Positive | Set Nebulizer    | 3.0 Bar   |
| Focus       | Not active | Set Capillary | 4000 V   | Set Dry Heater   | 200 °C    |
| Scan Begin  | 50 m/z     | Set End Plate | -500 V   | Set Dry Gas      | 8.0 l/min |
| Scan End    | 1500 m/z   | Set Charging  | 2000 V   | Set Divert Valve | Waste     |
|             |            | Set Voltage   | 0 nA     | Set APCI Heater  | 0 °C      |

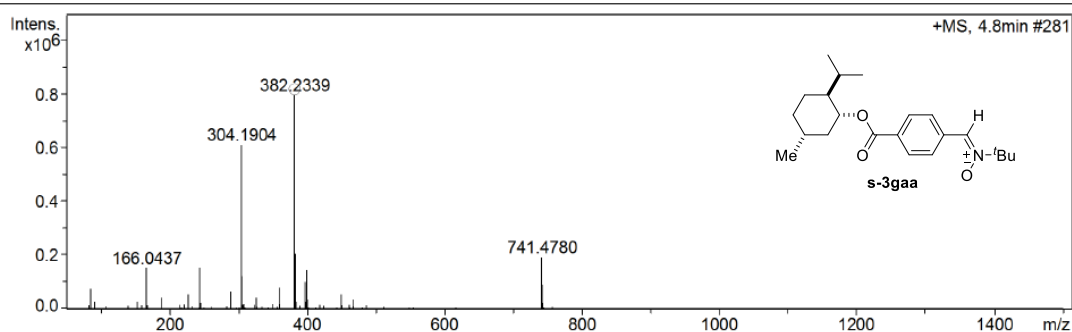

| Meas. m/z | # | Ion Formula | m/z err [ppm] | mSigma | #   | mSigma | Score  | rdB | e;Y  | Conf | N-Rule |
|-----------|---|-------------|---------------|--------|-----|--------|--------|-----|------|------|--------|
| 382.2339  | 1 | C22H33NNaO3 | 382.2353      | 3.5    | 6.6 | 1      | 100.00 | 7.0 | even |      | ok     |

## Mass Spectrum SmartFormula Report

**Analysis Info** Acquisition D 2022-07-21 17:00:03  
 Analysis Name g:\Desktop\0718\_BE4\_01\_15378.d  
 Method LC\_NO UV\_P50-1500\_30MIN.m Operator Demo User  
 Sample Name 0718 Instrument compact 8255754.2017

Comment

**Acquisition Paramet**

|             |            |               |          |                  |           |
|-------------|------------|---------------|----------|------------------|-----------|
| Source Type | ESI        | Ion Polarity  | Positive | Set Nebulizer    | 3.0 Bar   |
| Focus       | Not active | Set Capillary | 4000 V   | Set Dry Heater   | 200 °C    |
| Scan Begin  | 50 m/z     | Set End Plate | -500 V   | Set Dry Gas      | 8.0 l/min |
| Scan End    | 1500 m/z   | Set Charging  | 2000 V   | Set Divert Valve | Waste     |
|             |            | Set Voltage   | 0 nA     | Set APCI Heater  | 0 °C      |

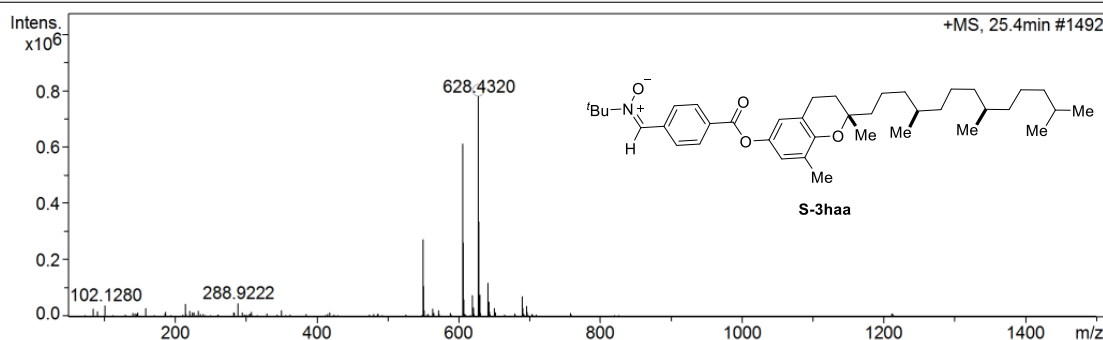

| Meas. m/z | # | Ion Formula | m/z err [ppm] | mSigma | #   | mSigma | Score  | rdB  | e;Y  | Conf | N-Rule |
|-----------|---|-------------|---------------|--------|-----|--------|--------|------|------|------|--------|
| 628.4320  | 1 | C39H59NNaO4 | 628.4336      | 2.5    | 0.9 | 1      | 100.00 | 11.0 | even |      | ok     |

## Mass Spectrum SmartFormula Report

**Analysis Info**

Analysis Name G:\ZM MS\0617\_GC6\_01\_14503.d  
 Method LC\_NO UV\_P50-1500\_6MIN.m  
 Sample Name 0617

Acquisition D 2022-06-20 14:30:08

Operator Demo User  
 Instrument compact 8255754.2017  
 6

**Comment**

**Acquisition Paramet**

|             |            |                 |          |                  |           |
|-------------|------------|-----------------|----------|------------------|-----------|
| Source Type | ESI        | Ion Polarity    | Positive | Set Nebulizer    | 3.0 Bar   |
| Focus       | Not active | Set Capillary   | 4000 V   | Set Dry Heater   | 50 °C     |
| Scan Begin  | 50 m/z     | Set End Plate   | -500 V   | Set Dry Gas      | 4.0 l/min |
| Scan End    | 1500 m/z   | Offset charging | 2000 V   | Set Divert Valve | Waste     |
|             |            | Set corona      | 0 nA     | Set APCI Heater  | 0 °C      |

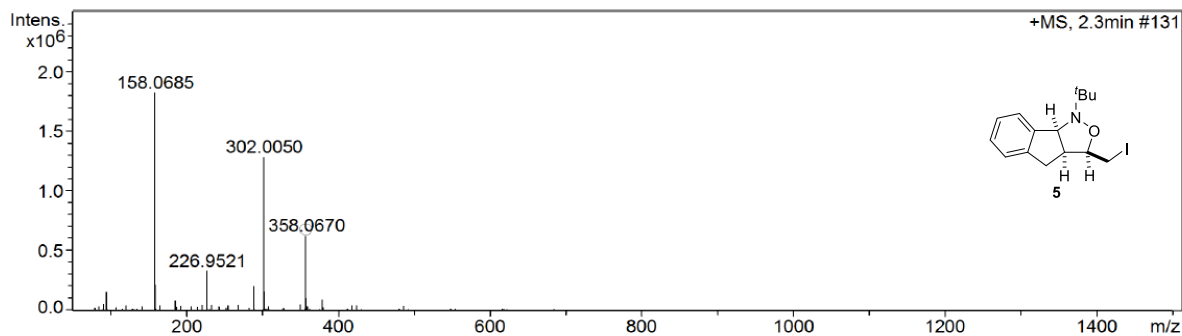

| Meas. m/z | # | Ion Formula | m/z      | err [ppm] | mSigma | # | mSigma | Score | rdB  | e;Y | Conf | N-Rule |
|-----------|---|-------------|----------|-----------|--------|---|--------|-------|------|-----|------|--------|
| 358.0670  | 1 | C15H21INO   | 358.0662 | -2.0      | 0.3    | 1 | 100.00 | 6.0   | even |     | ok   |        |

## Mass Spectrum SmartFormula Report

**Analysis Info**

Analysis Name G:\ZM MS\0617\_GC7\_01\_14504.d  
 Method LC\_NO UV\_P50-1500\_6MIN.m  
 Sample Name 0617

Acquisition D 2022-06-20 14:37:59

Operator Demo User  
 Instrument compact 8255754.2017  
 6

**Comment**

**Acquisition Paramet**

|             |            |                 |          |                  |           |
|-------------|------------|-----------------|----------|------------------|-----------|
| Source Type | ESI        | Ion Polarity    | Positive | Set Nebulizer    | 3.0 Bar   |
| Focus       | Not active | Set Capillary   | 4000 V   | Set Dry Heater   | 50 °C     |
| Scan Begin  | 50 m/z     | Set End Plate   | -500 V   | Set Dry Gas      | 4.0 l/min |
| Scan End    | 1500 m/z   | Offset charging | 2000 V   | Set Divert Valve | Waste     |
|             |            | Set corona      | 0 nA     | Set APCI Heater  | 0 °C      |

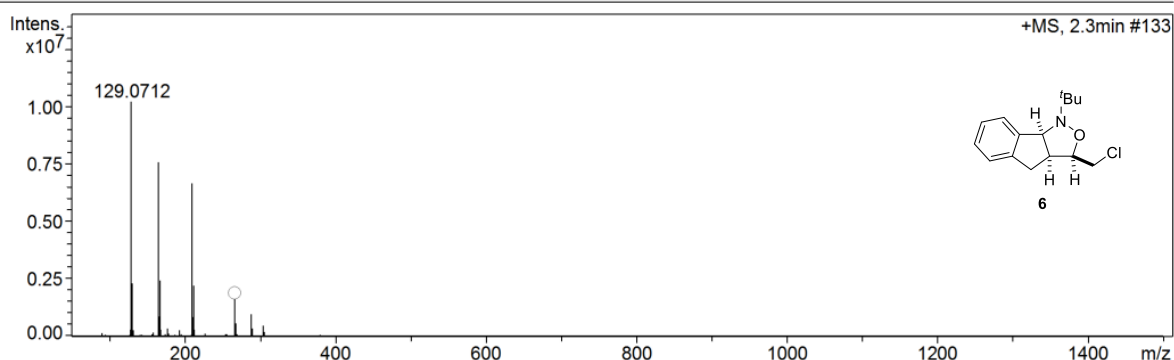

| Meas. m/z | # | Ion Formula | m/z      | err [ppm] | mSigma | # | mSigma | Score | rdB  | e;Y | Conf | N-Rule |
|-----------|---|-------------|----------|-----------|--------|---|--------|-------|------|-----|------|--------|
| 266.1310  | 1 | C15H21ClNO  | 266.1306 | -1.3      | 4.2    | 1 | 100.00 | 6.0   | even |     | ok   |        |

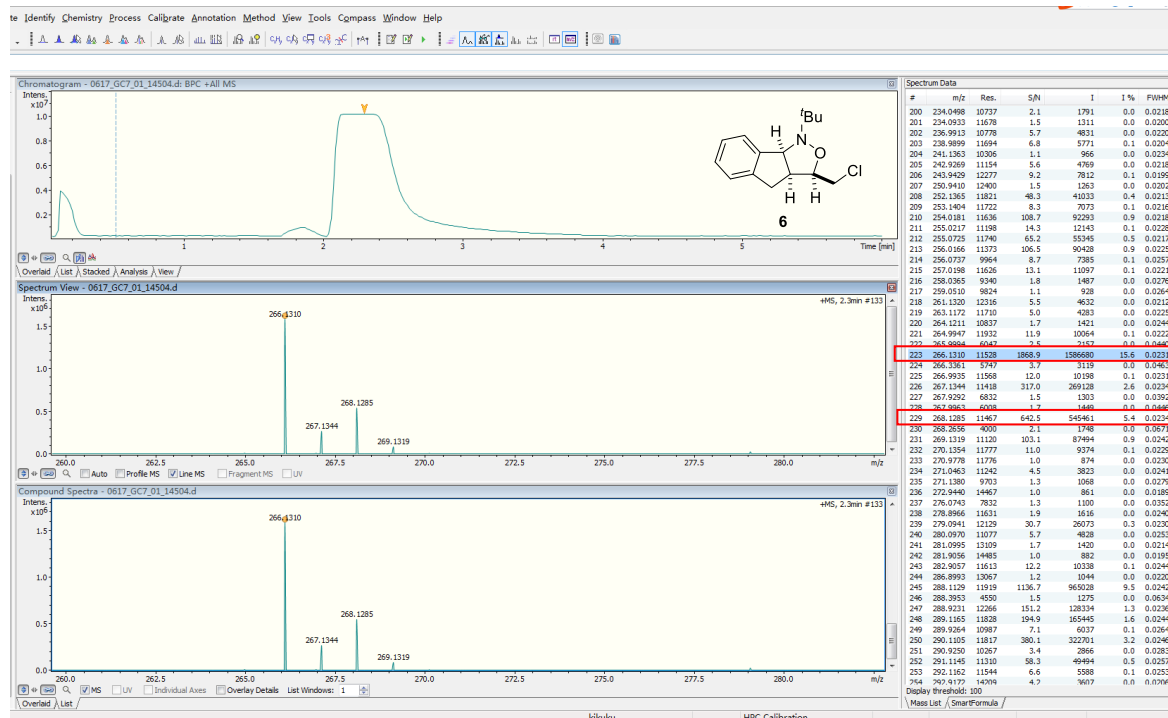

## Mass Spectrum SmartFormula Report

### Analysis Info

Analysis Name G:\ZM MS\0617\_GC7\_01\_14504.d  
 Method LC\_NO UV\_P50-1500\_6MIN.m  
 Sample Name 0617

Acquisition D 2022-06-20 14:37:59

Operator Demo User  
 Instrument compact 8255754.2017  
 6

### Comment

### Acquisition Paramet

|             |            |               |          |                  |           |
|-------------|------------|---------------|----------|------------------|-----------|
| Source Type | ESI        | Ion Polarity  | Positive | Set Nebulizer    | 3.0 Bar   |
| Focus       | Not active | Set Capillary | 4000 V   | Set Dry Heater   | 50 °C     |
| Scan Begin  | 50 m/z     | Set End Plate | -500 V   | Set Dry Gas      | 4.0 l/min |
| Scan End    | 1500 m/z   | Set Charging  | 2000 V   | Set Divert Valve | Waste     |
|             |            | Set Corona    | 0 nA     | Set APCI Heater  | 0 °C      |

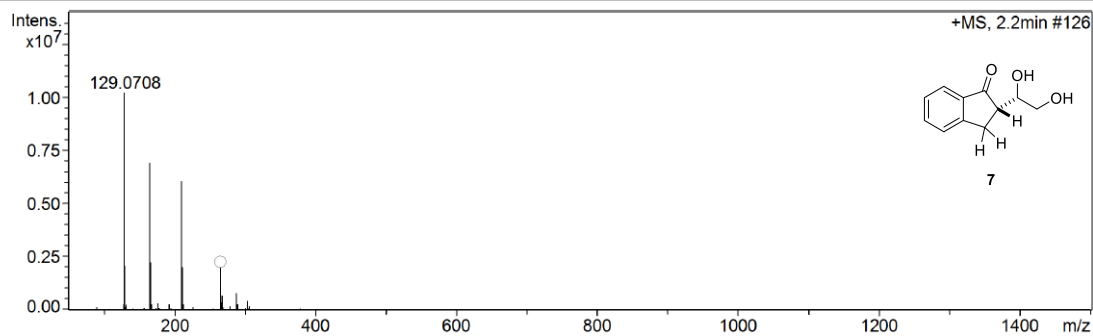

| Meas. m/z | # | Ion Formula | m/z err [ppm] | mSigma | #   | mSigma | Score  | rdb | e    | Y | Conf | N-Rule |
|-----------|---|-------------|---------------|--------|-----|--------|--------|-----|------|---|------|--------|
| 266.1311  | 1 | C15H21ClNO  | 266.1306      | -1.8   | 3.0 | 1      | 100.00 | 6.0 | even |   | ok   |        |

## Mass Spectrum SmartFormula Report

**Analysis Info**

Analysis Name G:\ZM MS\0412\_RD7\_01\_12750.d  
 Method LC\_NO UV\_P50-1500\_6MIN.m  
 Sample Name 0412

Acquisition D 2022-04-13 14:23:11

Operator Demo User  
 Instrument compact 8255754.2017  
 6

**Comment**
**Acquisition Paramet**

|             |            |                 |          |                  |           |
|-------------|------------|-----------------|----------|------------------|-----------|
| Source Type | ESI        | Ion Polarity    | Positive | Set Nebulizer    | 3.0 Bar   |
| Focus       | Not active | Set Capillary   | 4000 V   | Set Dry Heater   | 200 °C    |
| Scan Begin  | 50 m/z     | Set End Plate   | -500 V   | Set Dry Gas      | 8.0 l/min |
| Scan End    | 1500 m/z   | Offset charging | 2000 V   | Set Divert Valve | Waste     |
|             |            | Set APCI Heater | 0 nA     | Set APCI Heater  | 0 °C      |

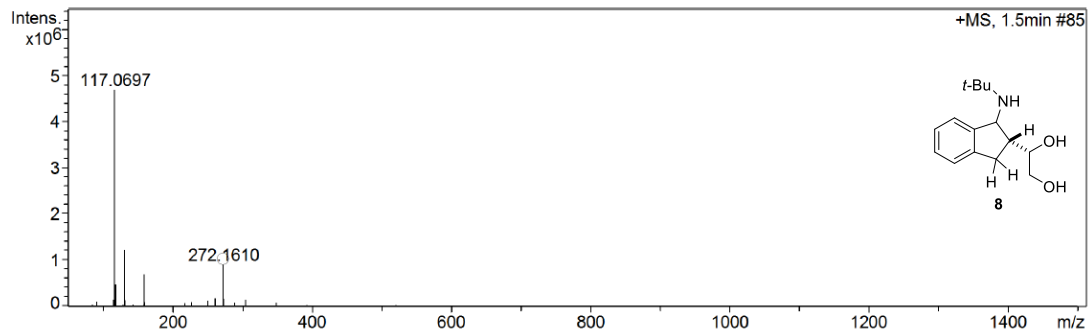

| Meas. m/z | # | Ion Formula | m/z err [ppm] | mSigma | #   | mSigma | Score  | rdb | ej   | Conf | N-Rule |
|-----------|---|-------------|---------------|--------|-----|--------|--------|-----|------|------|--------|
| 272.1610  | 1 | C15H23NNaO2 | 272.1621      | 4.1    | 0.4 | 1      | 100.00 | 5.0 | even |      | ok     |

## Mass Spectrum SmartFormula Report

**Analysis Info**

Analysis Name G:\ZM MS\0412\_RB5\_01\_12732.d  
 Method LC\_NO UV\_P50-1500\_6MIN.m  
 Sample Name 0412

Acquisition D 2022-04-13 12:00:54

Operator Demo User  
 Instrument compact 8255754.2017  
 6

**Comment**
**Acquisition Paramet**

|             |            |                 |          |                  |           |
|-------------|------------|-----------------|----------|------------------|-----------|
| Source Type | ESI        | Ion Polarity    | Positive | Set Nebulizer    | 3.0 Bar   |
| Focus       | Not active | Set Capillary   | 4000 V   | Set Dry Heater   | 200 °C    |
| Scan Begin  | 50 m/z     | Set End Plate   | -500 V   | Set Dry Gas      | 8.0 l/min |
| Scan End    | 1500 m/z   | Offset charging | 2000 V   | Set Divert Valve | Waste     |
|             |            | Set APCI Heater | 0 nA     | Set APCI Heater  | 0 °C      |

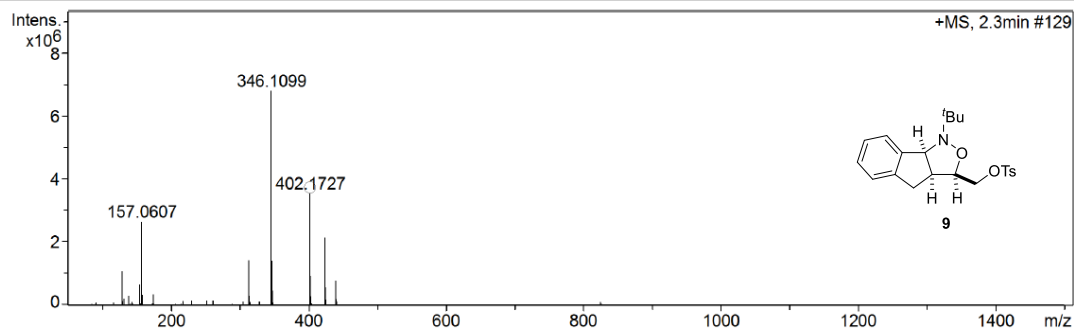

| Meas. m/z | # | Ion Formula | m/z err [ppm] | mSigma | #   | mSigma | Score  | rdb  | ej   | Conf | N-Rule |
|-----------|---|-------------|---------------|--------|-----|--------|--------|------|------|------|--------|
| 402.1727  | 1 | C22H28NO4S  | 402.1734      | 1.7    | 3.3 | 1      | 100.00 | 10.0 | even |      | ok     |

## Mass Spectrum SmartFormula Report

Analysis Info Acquisition D 2022-06-24 17:01:13  
Analysis Name G:\ZM MS\0621\_GD3\_01\_14604.d  
Method LC\_NO UV\_P50-1500\_6MIN.m Operator Demo User  
Sample Name 0621 Instrumen compact 8255754.2017  
6

Comment

### Acquisition Paramet

|             |            |                 |          |                  |           |
|-------------|------------|-----------------|----------|------------------|-----------|
| Source Type | ESI        | Ion Polarity    | Positive | Set Nebulizer    | 3.0 Bar   |
| Focus       | Not active | Set Capillary   | 4000 V   | Set Dry Heater   | 200 °C    |
| Scan Begin  | 50 m/z     | Set End Plate   | -500 V   | Set Dry Gas      | 8.0 l/min |
| Scan End    | 1500 m/z   | Offset charging | 2000 V   | Set Divert Valve | Waste     |
|             |            | Set APCI Heater | 0 nA     | Set APCI Heater  | 0 °C      |

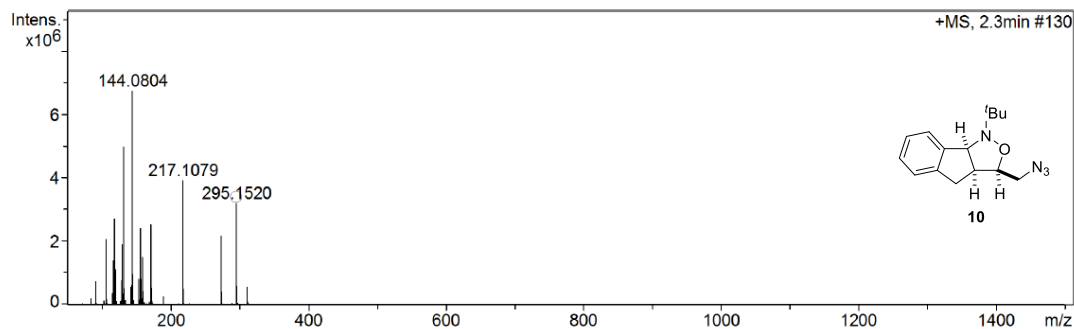

| Meas. m/z | # | Ion Formula | m/z err [ppm] | mSigma | #   | mSigma | Score  | rdb | ej   | ¶ | Conf | N-Rule |
|-----------|---|-------------|---------------|--------|-----|--------|--------|-----|------|---|------|--------|
| 295.1520  | 1 | C15H20N4NaO | 295.1529      | 3.1    | 1.9 | 1      | 100.00 | 8.0 | even |   |      | ok     |

## Mass Spectrum SmartFormula Report

Analysis Info Acquisition D 2022-06-20 15:00:18  
Analysis Name G:\ZM MS\0617\_GD2\_01\_14507.d  
Method LC\_NO UV\_P50-1500\_6MIN.m Operator Demo User  
Sample Name 0617 Instrumen compact 8255754.2017  
6

Comment

### Acquisition Paramet

|             |            |                 |          |                  |           |
|-------------|------------|-----------------|----------|------------------|-----------|
| Source Type | ESI        | Ion Polarity    | Positive | Set Nebulizer    | 3.0 Bar   |
| Focus       | Not active | Set Capillary   | 4000 V   | Set Dry Heater   | 50 °C     |
| Scan Begin  | 50 m/z     | Set End Plate   | -500 V   | Set Dry Gas      | 4.0 l/min |
| Scan End    | 1500 m/z   | Offset charging | 2000 V   | Set Divert Valve | Waste     |
|             |            | Set APCI Heater | 0 nA     | Set APCI Heater  | 0 °C      |

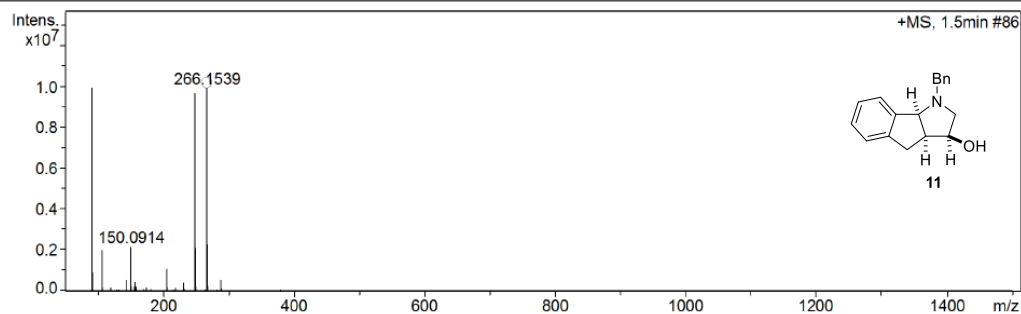

| Meas. m/z | # | Ion Formula | m/z err [ppm] | mSigma | #    | mSigma | Score  | rdb  | ej   | ¶ | Conf | N-Rule |
|-----------|---|-------------|---------------|--------|------|--------|--------|------|------|---|------|--------|
| 266.1539  | 1 | C18H20NO    | 266.1539      | -0.0   | 17.8 | 1      | 100.00 | 10.0 | even |   |      | ok     |
